# Supplementary material for: XMR: A cross-population Mendelian randomization method for causal inference using genome-wide summary statistics
Source: medRxiv preprint, doi:10.64898/2026.03.10.26348003, version 1 (2026-03-10)
Supplement: Supplementary tables (S4-S25) [file 348003_file03.xlsx]

## Sheet: Table S4-negative control data
Table S4	GWAS sources for traits used in real-data negative control studies from Pan-UKBB
column description:
n_population: sample size in the corresponding population
35 exposure traits
trait_type	phenocode	pheno_sex	trait description	category	n_EUR	n_AFR	n_CSA	wget
biomarkers	30600	both_sexes	Albumin	Biological samples > Assay results > Blood assays > Blood biochemistry	367192	5759	7694	wget https://pan-ukb-us-east-1.s3.amazonaws.com/sumstats_flat_files/biomarkers-30600-both_sexes-irnt.tsv.bgz
biomarkers	30870	both_sexes	Triglycerides	Biological samples > Assay results > Blood assays > Blood biochemistry	400639	6211	8415	wget https://pan-ukb-us-east-1.s3.amazonaws.com/sumstats_flat_files/biomarkers-30870-both_sexes-irnt.tsv.bgz
biomarkers	30890	both_sexes	Vitamin D	Biological samples > Assay results > Blood assays > Blood biochemistry	383324	6046	7380	wget https://pan-ukb-us-east-1.s3.amazonaws.com/sumstats_flat_files/biomarkers-30890-both_sexes-irnt.tsv.bgz
continuous	20015	both_sexes	Sitting height	UK Biobank Assessment Centre > Physical measures > Anthropometry > Body size measures	419233	6554	8649	wget https://pan-ukb-us-east-1.s3.amazonaws.com/sumstats_flat_files/continuous-20015-both_sexes-irnt.tsv.bgz
continuous	21002	both_sexes	Weight	UK Biobank Assessment Centre > Physical measures > Anthropometry > Body size measures	419316	6558	8771	wget https://pan-ukb-us-east-1.s3.amazonaws.com/sumstats_flat_files/continuous-21002-both_sexes-irnt.tsv.bgz
continuous	23098	both_sexes	Weight	UK Biobank Assessment Centre > Physical measures > Anthropometry > Impedance measures	413194	6458	8658	wget https://pan-ukb-us-east-1.s3.amazonaws.com/sumstats_flat_files/continuous-23098-both_sexes-irnt.tsv.bgz
continuous	23099	both_sexes	Body fat percentage	UK Biobank Assessment Centre > Physical measures > Anthropometry > Impedance measures	412960	6455	8654	wget https://pan-ukb-us-east-1.s3.amazonaws.com/sumstats_flat_files/continuous-23099-both_sexes-irnt.tsv.bgz
continuous	23100	both_sexes	Whole body fat mass	UK Biobank Assessment Centre > Physical measures > Anthropometry > Impedance measures	412524	6450	8645	wget https://pan-ukb-us-east-1.s3.amazonaws.com/sumstats_flat_files/continuous-23100-both_sexes-irnt.tsv.bgz
continuous	23101	both_sexes	Whole body fat-free mass	UK Biobank Assessment Centre > Physical measures > Anthropometry > Impedance measures	413158	6456	8658	wget https://pan-ukb-us-east-1.s3.amazonaws.com/sumstats_flat_files/continuous-23101-both_sexes-irnt.tsv.bgz
continuous	23102	both_sexes	Whole body water mass	UK Biobank Assessment Centre > Physical measures > Anthropometry > Impedance measures	413190	6458	8658	wget https://pan-ukb-us-east-1.s3.amazonaws.com/sumstats_flat_files/continuous-23102-both_sexes-irnt.tsv.bgz
continuous	23105	both_sexes	Basal metabolic rate	UK Biobank Assessment Centre > Physical measures > Anthropometry > Impedance measures	413178	6458	8658	wget https://pan-ukb-us-east-1.s3.amazonaws.com/sumstats_flat_files/continuous-23105-both_sexes-irnt.tsv.bgz
continuous	23106	both_sexes	Impedance of whole body	UK Biobank Assessment Centre > Physical measures > Anthropometry > Impedance measures	413153	6458	8654	wget https://pan-ukb-us-east-1.s3.amazonaws.com/sumstats_flat_files/continuous-23106-both_sexes-irnt.tsv.bgz
continuous	23109	both_sexes	Impedance of arm (right)	UK Biobank Assessment Centre > Physical measures > Anthropometry > Impedance measures	413141	6458	8658	wget https://pan-ukb-us-east-1.s3.amazonaws.com/sumstats_flat_files/continuous-23109-both_sexes-irnt.tsv.bgz
continuous	23110	both_sexes	Impedance of arm (left)	UK Biobank Assessment Centre > Physical measures > Anthropometry > Impedance measures	413157	6458	8658	wget https://pan-ukb-us-east-1.s3.amazonaws.com/sumstats_flat_files/continuous-23110-both_sexes-irnt.tsv.bgz
continuous	23113	both_sexes	Leg fat-free mass (right)	UK Biobank Assessment Centre > Physical measures > Anthropometry > Impedance measures	413147	6458	8658	wget https://pan-ukb-us-east-1.s3.amazonaws.com/sumstats_flat_files/continuous-23113-both_sexes-irnt.tsv.bgz
continuous	23114	both_sexes	Leg predicted mass (right)	UK Biobank Assessment Centre > Physical measures > Anthropometry > Impedance measures	413146	6458	8658	wget https://pan-ukb-us-east-1.s3.amazonaws.com/sumstats_flat_files/continuous-23114-both_sexes-irnt.tsv.bgz
continuous	23117	both_sexes	Leg fat-free mass (left)	UK Biobank Assessment Centre > Physical measures > Anthropometry > Impedance measures	413118	6455	8658	wget https://pan-ukb-us-east-1.s3.amazonaws.com/sumstats_flat_files/continuous-23117-both_sexes-irnt.tsv.bgz
continuous	23118	both_sexes	Leg predicted mass (left)	UK Biobank Assessment Centre > Physical measures > Anthropometry > Impedance measures	413113	6455	8658	wget https://pan-ukb-us-east-1.s3.amazonaws.com/sumstats_flat_files/continuous-23118-both_sexes-irnt.tsv.bgz
continuous	23119	both_sexes	Arm fat percentage (right)	UK Biobank Assessment Centre > Physical measures > Anthropometry > Impedance measures	413107	6454	8658	wget https://pan-ukb-us-east-1.s3.amazonaws.com/sumstats_flat_files/continuous-23119-both_sexes-irnt.tsv.bgz
continuous	23120	both_sexes	Arm fat mass (right)	UK Biobank Assessment Centre > Physical measures > Anthropometry > Impedance measures	413080	6454	8658	wget https://pan-ukb-us-east-1.s3.amazonaws.com/sumstats_flat_files/continuous-23120-both_sexes-irnt.tsv.bgz
continuous	23121	both_sexes	Arm fat-free mass (right)	UK Biobank Assessment Centre > Physical measures > Anthropometry > Impedance measures	413074	6454	8658	wget https://pan-ukb-us-east-1.s3.amazonaws.com/sumstats_flat_files/continuous-23121-both_sexes-irnt.tsv.bgz
continuous	23122	both_sexes	Arm predicted mass (right)	UK Biobank Assessment Centre > Physical measures > Anthropometry > Impedance measures	413067	6454	8657	wget https://pan-ukb-us-east-1.s3.amazonaws.com/sumstats_flat_files/continuous-23122-both_sexes-irnt.tsv.bgz
continuous	23123	both_sexes	Arm fat percentage (left)	UK Biobank Assessment Centre > Physical measures > Anthropometry > Impedance measures	413046	6454	8657	wget https://pan-ukb-us-east-1.s3.amazonaws.com/sumstats_flat_files/continuous-23123-both_sexes-irnt.tsv.bgz
continuous	23124	both_sexes	Arm fat mass (left)	UK Biobank Assessment Centre > Physical measures > Anthropometry > Impedance measures	413007	6454	8656	wget https://pan-ukb-us-east-1.s3.amazonaws.com/sumstats_flat_files/continuous-23124-both_sexes-irnt.tsv.bgz
continuous	23125	both_sexes	Arm fat-free mass (left)	UK Biobank Assessment Centre > Physical measures > Anthropometry > Impedance measures	412998	6453	8655	wget https://pan-ukb-us-east-1.s3.amazonaws.com/sumstats_flat_files/continuous-23125-both_sexes-irnt.tsv.bgz
continuous	23126	both_sexes	Arm predicted mass (left)	UK Biobank Assessment Centre > Physical measures > Anthropometry > Impedance measures	412983	6453	8654	wget https://pan-ukb-us-east-1.s3.amazonaws.com/sumstats_flat_files/continuous-23126-both_sexes-irnt.tsv.bgz
continuous	23129	both_sexes	Trunk fat-free mass	UK Biobank Assessment Centre > Physical measures > Anthropometry > Impedance measures	412844	6451	8652	wget https://pan-ukb-us-east-1.s3.amazonaws.com/sumstats_flat_files/continuous-23129-both_sexes-irnt.tsv.bgz
continuous	23130	both_sexes	Trunk predicted mass	UK Biobank Assessment Centre > Physical measures > Anthropometry > Impedance measures	412802	6451	8649	wget https://pan-ukb-us-east-1.s3.amazonaws.com/sumstats_flat_files/continuous-23130-both_sexes-irnt.tsv.bgz
continuous	30100	both_sexes	Mean platelet (thrombocyte) volume	Biological samples > Assay results > Blood assays > Blood count	407987	6281	8532	wget https://pan-ukb-us-east-1.s3.amazonaws.com/sumstats_flat_files/continuous-30100-both_sexes-irnt.tsv.bgz
continuous	30300	both_sexes	High light scatter reticulocyte count	Biological samples > Assay results > Blood assays > Blood count	401345	6108	8315	wget https://pan-ukb-us-east-1.s3.amazonaws.com/sumstats_flat_files/continuous-30300-both_sexes-irnt.tsv.bgz
continuous	3062	both_sexes	Forced vital capacity (FVC)	UK Biobank Assessment Centre > Physical measures > Spirometry	383471	5978	8080	wget https://pan-ukb-us-east-1.s3.amazonaws.com/sumstats_flat_files/continuous-3062-both_sexes-irnt.tsv.bgz
continuous	3063	both_sexes	Forced expiratory volume in 1-second (FEV1)	UK Biobank Assessment Centre > Physical measures > Spirometry	383471	5978	8080	wget https://pan-ukb-us-east-1.s3.amazonaws.com/sumstats_flat_files/continuous-3063-both_sexes-irnt.tsv.bgz
continuous	3064	both_sexes	Peak expiratory flow (PEF)	UK Biobank Assessment Centre > Physical measures > Spirometry	383471	5978	8080	wget https://pan-ukb-us-east-1.s3.amazonaws.com/sumstats_flat_files/continuous-3064-both_sexes-irnt.tsv.bgz
continuous	50	both_sexes	Standing height	UK Biobank Assessment Centre > Physical measures > Anthropometry > Body size measures	419596	6556	8657	wget https://pan-ukb-us-east-1.s3.amazonaws.com/sumstats_flat_files/continuous-50-both_sexes-irnt.tsv.bgz
continuous	51	both_sexes	Seated height	UK Biobank Assessment Centre > Physical measures > Anthropometry > Body size measures	419245	6554	8649	wget https://pan-ukb-us-east-1.s3.amazonaws.com/sumstats_flat_files/continuous-51-both_sexes-irnt.tsv.bgz
2 outcome traits
categorical	1747_5	both_sexes	Hair colour (natural	UK Biobank Assessment Centre > Touchscreen > Lifestyle and environment > Sun exposure	419469	6543	8670	wget https://pan-ukb-us-east-1.s3.amazonaws.com/sumstats_flat_files/categorical-1747-both_sexes-5.tsv.bgz
continuous	1727	both_sexes	Ease of skin tanning	UK Biobank Assessment Centre > Touchscreen > Lifestyle and environment > Sun exposure	411779	4689	7502	wget https://pan-ukb-us-east-1.s3.amazonaws.com/sumstats_flat_files/continuous-1727-both_sexes.tsv.bgz

## Sheet: Table S5-nc AFR results 1
Table S5	Results of negative control study in Africans across 15 methods under three IV selection thresholds (5e-5, 5e-6, 5e-7)
column description:
exposure: phecode of the exposure
outcome: phecode of the outcome
exposure_name: description of the exposure
outcome_name: description of the outcome
exp_N1: sample size of the exposure trait in the auxiliary population
exp_N2: sample size of the exposure trait in the target population
Threshold: IV selection threshold
For each of the following MR methods, its results are recorded in these columns:
method list: XMR, MRAPSS, Egger, Weighted-mode, IVW, Weighted-median, CAUSE (5e-5), MRMix, MR-Robust, MR-PRESSO, MR-Lasso, IVW_fe, cML-MA, ConMix, dIVW
nIV_method: number of IVs used in the corresponding method
beta_method: causal effect estimate by the corresponding method
beta.se_method: standard error of the causal effect estimate by the corresponding method
beta.pvalue_method: p-value of the causal effect estimate by the corresponding method
Unique columns:
Threshold_modified_XMR: modified threshold used in XMR fitting algorithm
nvalid_XMR: number of valid IVs detected by XMR
nvalid_MRAPSS: number of valid IVs detected by MRAPSS
CL_ConMix: The lower limit of the 95% confidence interval from ConMix
CU_ConMix: The upper limit of the 95% confidence interval from ConMix
exposure	outcome	exposure_name	outcome_name	exp_N1	exp_N2	Threshold	Threshold_modified_XMR	nIV_XMR	nvalid_XMR	beta_XMR	beta.se_XMR	beta.pvalue_XMR	nIV_MRAPSS	nvalid_MRAPSS	beta_MRAPSS	beta.se_MRAPSS	beta.pvalue_MRAPSS	nIV_Egger	beta_Egger	beta.se_Egger	beta.pvalue_Egger	nIV_Weighted-mode	beta_Weighted-mode	beta.se_Weighted-mode	beta.pvalue_Weighted-mode	nIV_IVW	beta_IVW	beta.se_IVW	beta.pvalue_IVW	nIV_Weighted-median	beta_Weighted-median	beta.se_Weighted-median	beta.pvalue_Weighted-median	nIV_CAUSE (5e-5)	beta_CAUSE (5e-5)	beta.se_CAUSE (5e-5)	beta.pvalue_CAUSE (5e-5)	nIV_MRMix	beta_MRMix	beta.se_MRMix	beta.pvalue_MRMix	nIV_MR-Robust	beta_MR-Robust	beta.se_MR-Robust	beta.pvalue_MR-Robust	nIV_MR-PRESSO	beta_MR-PRESSO	beta.se_MR-PRESSO	beta.pvalue_MR-PRESSO
50	1727	Standing height	Ease of skin tanning	419596	6556	5e-07	1.3086796091244e-09	2277	592.082	-0.008	0.029177	0.78407	NA	NA	NA	NA	NA	NA	NA	NA	NA	NA	NA	NA	NA	NA	NA	NA	NA	NA	NA	NA	NA	NA	NA	NA	NA	NA	NA	NA	NA	NA	NA	NA	NA	NA	NA	NA	NA
50	1727	Standing height	Ease of skin tanning	419596	6556	5e-06	2.08492441089447e-08	2735	666.512	-0.0234	0.0313815	0.45612	6	5.99938	0.867534	0.750523	0.24772	6	1.89461	5.22809	0.735396	6	0.113424	0.162415	0.516092	6	0.0855725	0.101838	0.400753	6	0.110169	0.119976	0.358481	6	1.13624387676481e-16	0.106645	0.158655	6	0.09	0.0998295	0.367303	6	0.092414	0.110477	0.402874	6	0.0855725	0.0416916	0.0953374
50	1727	Standing height	Ease of skin tanning	419596	6556	5e-05	3.47561655233974e-07	3350	806.042	-0.044	0.0296947	0.13801	45	44.9539	-0.220219	0.234736	0.34816	45	1.29331	0.84104	0.131436	45	0.0557447	0.118111	0.63928	45	-0.110947	0.040726	0.00644497	45	-0.038178	0.0560555	0.495824	45	-3.92394e-15	0.471015	NA	45	-0.13	0.0603361	0.0311933	45	-0.08765	0.0478544	0.0670112	45	-0.110947	0.037159	0.00460771
50	1747_5	Standing height	Hair colour (natural	419596	6556	5e-07	1.3086796091244e-09	2277	586.36	0.0051	0.0219887	0.81749	NA	NA	NA	NA	NA	NA	NA	NA	NA	NA	NA	NA	NA	NA	NA	NA	NA	NA	NA	NA	NA	NA	NA	NA	NA	NA	NA	NA	NA	NA	NA	NA	NA	NA	NA	NA	NA
50	1747_5	Standing height	Hair colour (natural	419596	6556	5e-06	2.08492441089447e-08	2735	660.071	-0.0012	0.00848882	0.89023	6	0.000709949	0.215191	42.6071	0.99597	6	4.95499	4.42583	0.325584	6	-0.0261445	0.170927	0.884413	6	-0.0153281	0.0862112	0.858882	6	-0.0281216	0.111366	0.800644	6	-0.00275624	0.158991	1	6	-0.015	0.0913679	0.869596	6	-0.0127292	0.0779919	0.870351	6	-0.0153281	0.0810955	0.857516
50	1747_5	Standing height	Hair colour (natural	419596	6556	5e-05	3.47561655233974e-07	3350	799.733	-0.0106	0.0223378	0.63606	45	44.9928	-0.372862	0.315344	0.23705	45	0.809503	0.957345	0.402473	45	-0.0250728	0.126602	0.843923	45	-0.0712576	0.046278	0.123615	45	-0.0668129	0.0546668	0.221638	45	-0.531084	0.278351	0.195416	45	2.00936105613651e-17	0.0656908	1	45	-0.0671117	0.0496643	0.176597	45	-0.0712576	0.046278	0.130777
51	1727	Seated height	Ease of skin tanning	419245	6554	5e-07	1.31093336186439e-09	1161	216.977	-0.0228	0.0572359	0.69062	NA	NA	NA	NA	NA	NA	NA	NA	NA	NA	NA	NA	NA	NA	NA	NA	NA	NA	NA	NA	NA	NA	NA	NA	NA	NA	NA	NA	NA	NA	NA	NA	NA	NA	NA	NA	NA
51	1727	Seated height	Ease of skin tanning	419245	6554	5e-06	2.08825499115051e-08	1500	245.331	-0.0637	0.0537245	0.23557	NA	NA	NA	NA	NA	NA	NA	NA	NA	NA	NA	NA	NA	NA	NA	NA	NA	NA	NA	NA	NA	NA	NA	NA	NA	NA	NA	NA	NA	NA	NA	NA	NA	NA	NA	NA	NA
51	1727	Seated height	Ease of skin tanning	419245	6554	5e-05	3.48069301381315e-07	2070	265.961	-0.0776	0.0508963	0.12746	43	4.05395	-8.04783	10.1928	0.42978	43	-0.839843	1.12973	0.461476	43	-0.143793	0.134755	0.292035	43	-0.098369	0.0483608	0.041945	43	-0.0939224	0.0624937	0.132862	43	-0.160414	0.484111	0.41804	43	-0.01	0.213723	0.962681	43	-0.0935538	0.048515	0.0538119	43	-0.098369	0.0483608	0.0482926
51	1747_5	Seated height	Hair colour (natural	419245	6554	5e-07	1.31093336186439e-09	1161	217.362	-0.0062	0.0353532	0.86185	NA	NA	NA	NA	NA	NA	NA	NA	NA	NA	NA	NA	NA	NA	NA	NA	NA	NA	NA	NA	NA	NA	NA	NA	NA	NA	NA	NA	NA	NA	NA	NA	NA	NA	NA	NA	NA
51	1747_5	Seated height	Hair colour (natural	419245	6554	5e-06	2.08825499115051e-08	1500	245.718	-0.0228	0.0451437	0.61323	NA	NA	NA	NA	NA	NA	NA	NA	NA	NA	NA	NA	NA	NA	NA	NA	NA	NA	NA	NA	NA	NA	NA	NA	NA	NA	NA	NA	NA	NA	NA	NA	NA	NA	NA	NA	NA
51	1747_5	Seated height	Hair colour (natural	419245	6554	5e-05	3.48069301381315e-07	2070	266.227	0.0158	0.0401979	0.69459	43	6.0239	-12.3809	120.36	0.91807	43	-0.68376	0.900737	0.452128	43	-0.160912	0.100184	0.115731	43	-0.0893405	0.0385606	0.0205099	43	-0.114103	0.0506386	0.0242417	43	-0.290726	0.397652	0.0246796	43	-0.11	0.055319	0.0467602	43	-0.115466	0.0364913	0.00155509	43	-0.0893405	0.0385606	0.0254583
3062	1727	Forced vital capacity (FVC)	Ease of skin tanning	383471	5978	5e-07	1.29911081891976e-09	719	86.8391	-0.107	0.107169	0.31795	NA	NA	NA	NA	NA	NA	NA	NA	NA	NA	NA	NA	NA	NA	NA	NA	NA	NA	NA	NA	NA	NA	NA	NA	NA	NA	NA	NA	NA	NA	NA	NA	NA	NA	NA	NA	NA
3062	1727	Forced vital capacity (FVC)	Ease of skin tanning	383471	5978	5e-06	2.07077797131916e-08	1019	103.945	-0.078	0.095206	0.41247	NA	NA	NA	NA	NA	NA	NA	NA	NA	NA	NA	NA	NA	NA	NA	NA	NA	NA	NA	NA	NA	NA	NA	NA	NA	NA	NA	NA	NA	NA	NA	NA	NA	NA	NA	NA	NA
3062	1727	Forced vital capacity (FVC)	Ease of skin tanning	383471	5978	5e-05	3.45404661983295e-07	1551	122.287	-0.0669	0.0835661	0.42343	35	33.5783	2.72077	3.28111	0.40698	35	0.720552	1.42845	0.617312	35	-0.19199	0.144557	0.192982	35	-0.05643	0.0492267	0.251659	35	-0.11732	0.0661921	0.0763242	35	0.0507962	0.302448	0.466689	35	-0.15	0.117047	0.200004	35	-0.0688768	0.0526675	0.190952	35	-0.05643	0.0492267	0.259663
3062	1747_5	Forced vital capacity (FVC)	Hair colour (natural	383471	5978	5e-07	1.29911081891976e-09	719	86.9691	-0.0353	0.0838071	0.6737	NA	NA	NA	NA	NA	NA	NA	NA	NA	NA	NA	NA	NA	NA	NA	NA	NA	NA	NA	NA	NA	NA	NA	NA	NA	NA	NA	NA	NA	NA	NA	NA	NA	NA	NA	NA	NA
3062	1747_5	Forced vital capacity (FVC)	Hair colour (natural	383471	5978	5e-06	2.07077797131916e-08	1019	104.492	-0.0756	0.0807988	0.3497	NA	NA	NA	NA	NA	NA	NA	NA	NA	NA	NA	NA	NA	NA	NA	NA	NA	NA	NA	NA	NA	NA	NA	NA	NA	NA	NA	NA	NA	NA	NA	NA	NA	NA	NA	NA	NA
3062	1747_5	Forced vital capacity (FVC)	Hair colour (natural	383471	5978	5e-05	3.45404661983295e-07	1551	121.229	-0.0613	0.0700615	0.3818	35	34.9261	-0.9426	1.0555	0.37184	35	-0.0855258	1.09584	0.938263	35	-0.013946	0.107391	0.897441	35	-0.0656446	0.0381613	0.0853985	35	-0.0365152	0.053799	0.497307	35	-0.0475944	0.26249	0.338392	35	-0.07	0.0425932	0.100289	35	-0.0539931	0.0440477	0.220279	35	-0.0656446	0.0327326	0.0529228
3063	1727	Forced expiratory volume in 1-second (FEV1)	Ease of skin tanning	383471	5978	5e-07	1.29911081891976e-09	612	76.9031	-0.0559	0.106736	0.6003	NA	NA	NA	NA	NA	NA	NA	NA	NA	NA	NA	NA	NA	NA	NA	NA	NA	NA	NA	NA	NA	NA	NA	NA	NA	NA	NA	NA	NA	NA	NA	NA	NA	NA	NA	NA	NA
3063	1727	Forced expiratory volume in 1-second (FEV1)	Ease of skin tanning	383471	5978	5e-06	2.07077797131916e-08	898	83.4443	-0.0427	0.0969539	0.6597	NA	NA	NA	NA	NA	NA	NA	NA	NA	NA	NA	NA	NA	NA	NA	NA	NA	NA	NA	NA	NA	NA	NA	NA	NA	NA	NA	NA	NA	NA	NA	NA	NA	NA	NA	NA	NA
3063	1727	Forced expiratory volume in 1-second (FEV1)	Ease of skin tanning	383471	5978	5e-05	3.45404661983295e-07	1392	96.5289	0.0077	0.0377504	0.83902	31	8.64214	-3.67996	4.86464	0.44937	31	0.626179	1.53072	0.68549	31	-0.0405383	0.129452	0.756331	31	-0.11411	0.0508034	0.0246971	31	-0.0470981	0.0685524	0.492059	31	-0.0445228	0.36115	0.919042	31	-0.15	0.16497	0.363215	31	-0.111028	0.0544786	0.0415494	31	-0.11411	0.0508034	0.0322151
3063	1747_5	Forced expiratory volume in 1-second (FEV1)	Hair colour (natural	383471	5978	5e-07	1.29911081891976e-09	612	77.6325	0.0302	0.0790671	0.70287	NA	NA	NA	NA	NA	NA	NA	NA	NA	NA	NA	NA	NA	NA	NA	NA	NA	NA	NA	NA	NA	NA	NA	NA	NA	NA	NA	NA	NA	NA	NA	NA	NA	NA	NA	NA	NA
3063	1747_5	Forced expiratory volume in 1-second (FEV1)	Hair colour (natural	383471	5978	5e-06	2.07077797131916e-08	898	83.828	0.0544	0.0708102	0.44231	NA	NA	NA	NA	NA	NA	NA	NA	NA	NA	NA	NA	NA	NA	NA	NA	NA	NA	NA	NA	NA	NA	NA	NA	NA	NA	NA	NA	NA	NA	NA	NA	NA	NA	NA	NA	NA
3063	1747_5	Forced expiratory volume in 1-second (FEV1)	Hair colour (natural	383471	5978	5e-05	3.45404661983295e-07	1392	96.3433	0.01	0.0538481	0.85313	31	5.80692	-2.50028	3.03197	0.40958	31	0.841386	1.31075	0.525972	31	0.00314982	0.116292	0.978571	31	-0.0742867	0.0436917	0.0890848	31	-0.0261334	0.0611797	0.669264	31	-0.0937349	0.263247	0.150916	31	2.00936105613651e-17	0.0679356	1	31	-0.0730934	0.0469321	0.119369	31	-0.0742867	0.0436917	0.0994312
3064	1727	Peak expiratory flow (PEF)	Ease of skin tanning	383471	5978	5e-07	1.29911081891976e-09	263	21.1155	-0.3296	0.259237	0.20357	NA	NA	NA	NA	NA	NA	NA	NA	NA	NA	NA	NA	NA	NA	NA	NA	NA	NA	NA	NA	NA	NA	NA	NA	NA	NA	NA	NA	NA	NA	NA	NA	NA	NA	NA	NA	NA
3064	1727	Peak expiratory flow (PEF)	Ease of skin tanning	383471	5978	5e-06	2.07077797131916e-08	404	23.6032	-0.3169	0.242435	0.19111	NA	NA	NA	NA	NA	NA	NA	NA	NA	NA	NA	NA	NA	NA	NA	NA	NA	NA	NA	NA	NA	NA	NA	NA	NA	NA	NA	NA	NA	NA	NA	NA	NA	NA	NA	NA	NA
3064	1727	Peak expiratory flow (PEF)	Ease of skin tanning	383471	5978	5e-05	3.45404661983295e-07	719	33.5531	-0.3205	0.1998	0.10865	33	9.70326	-4.2133	3.36622	0.2107	33	-0.27177	1.21282	0.824164	33	-0.217746	0.136925	0.121609	33	-0.137094	0.0524214	0.00891653	33	-0.155003	0.0653913	0.0177693	33	1.8249290967276e-14	0.526911	0.158655	33	-0.08	0.0664134	0.228367	33	-0.124319	0.0462068	0.00713487	33	-0.137094	0.0524214	0.0134883
3064	1747_5	Peak expiratory flow (PEF)	Hair colour (natural	383471	5978	5e-07	1.29911081891976e-09	263	20.682	-0.0846	0.205378	0.68036	NA	NA	NA	NA	NA	NA	NA	NA	NA	NA	NA	NA	NA	NA	NA	NA	NA	NA	NA	NA	NA	NA	NA	NA	NA	NA	NA	NA	NA	NA	NA	NA	NA	NA	NA	NA	NA
3064	1747_5	Peak expiratory flow (PEF)	Hair colour (natural	383471	5978	5e-06	2.07077797131916e-08	404	23.0459	-0.074	0.158233	0.64024	NA	NA	NA	NA	NA	NA	NA	NA	NA	NA	NA	NA	NA	NA	NA	NA	NA	NA	NA	NA	NA	NA	NA	NA	NA	NA	NA	NA	NA	NA	NA	NA	NA	NA	NA	NA	NA
3064	1747_5	Peak expiratory flow (PEF)	Hair colour (natural	383471	5978	5e-05	3.45404661983295e-07	719	32.7936	0.0014	0.0362301	0.97001	33	32.9956	4.29953	2.82926	0.1286	33	1.70422	0.983274	0.0929966	33	0.264281	0.125821	0.0436582	33	0.0899781	0.0443035	0.0422602	33	0.0827265	0.0602814	0.169958	33	0.200429	0.325044	0.0229942	33	0.14	0.0815231	0.0859234	33	0.103048	0.0463237	0.0261139	33	0.0899781	0.0443035	0.0506373
20015	1727	Sitting height	Ease of skin tanning	419233	6554	5e-07	1.31105482026328e-09	1841	374.802	-0.0468	0.0426923	0.27272	NA	NA	NA	NA	NA	NA	NA	NA	NA	NA	NA	NA	NA	NA	NA	NA	NA	NA	NA	NA	NA	NA	NA	NA	NA	NA	NA	NA	NA	NA	NA	NA	NA	NA	NA	NA	NA
20015	1727	Sitting height	Ease of skin tanning	419233	6554	5e-06	2.08843438098683e-08	2277	429.423	-0.0537	0.0405358	0.1851	5	4.99942	1.30342	1.28645	0.31097	5	-1.08794	4.34933	0.81863	5	-0.0731807	0.18315	0.709892	5	0.0420739	0.111793	0.706652	5	-0.0486909	0.147107	0.740653	5	0.0340251	0.13944	0.91472	5	0.045	0.111996	0.687831	5	0.0324726	0.155462	0.834543	5	0.0420739	0.075559	0.607323
20015	1727	Sitting height	Ease of skin tanning	419233	6554	5e-05	3.48096643287832e-07	2952	471.742	-0.0468	0.0386342	0.22587	48	0.00556003	-0.0863643	11.7743	0.99415	48	0.268704	0.945989	0.77765	48	0.0281507	0.122003	0.818521	48	-0.0913088	0.0418199	0.0290077	48	-0.01457	0.0574738	0.799877	48	-7.66748e-16	0.392842	NA	48	0.06	0.265021	0.820893	48	-0.0804923	0.0460082	0.0802011	48	-0.0913088	0.0418199	0.0340352
20015	1747_5	Sitting height	Hair colour (natural	419233	6554	5e-07	1.31105482026328e-09	1841	375.549	0.0063	0.0290656	0.82856	NA	NA	NA	NA	NA	NA	NA	NA	NA	NA	NA	NA	NA	NA	NA	NA	NA	NA	NA	NA	NA	NA	NA	NA	NA	NA	NA	NA	NA	NA	NA	NA	NA	NA	NA	NA	NA
20015	1747_5	Sitting height	Hair colour (natural	419233	6554	5e-06	2.08843438098683e-08	2277	428.189	-0.0029	0.0177817	0.86944	5	0.000554029	0.413359	59.6013	0.99447	5	-0.413136	3.68192	0.917746	5	-0.0556039	0.164749	0.752702	5	-0.0145043	0.0946381	0.878193	5	-0.0140878	0.117499	0.904565	5	-0.00143118	0.103694	0.999925	5	-0.01	0.0947481	0.915945	5	-0.0195782	0.0851054	0.818056	5	-0.0145043	0.0634072	0.830283
20015	1747_5	Sitting height	Hair colour (natural	419233	6554	5e-05	3.48096643287832e-07	2952	471.148	2e-04	0.00208615	0.93649	48	6.61978	3.33332	2.23776	0.13633	48	-0.448717	0.775419	0.56563	48	-0.025916	0.109482	0.813906	48	0.0133371	0.0343576	0.697879	48	0.00108517	0.0498808	0.982643	48	0.095132	0.259369	0.955627	48	0.02	0.126508	0.874384	48	0.00195074	0.0344563	0.954852	48	0.0133371	0.0343576	0.699632
21002	1727	Weight	Ease of skin tanning	419316	6558	5e-07	1.31280386561627e-09	1251	130.857	0.0499	0.072093	0.48893	NA	NA	NA	NA	NA	NA	NA	NA	NA	NA	NA	NA	NA	NA	NA	NA	NA	NA	NA	NA	NA	NA	NA	NA	NA	NA	NA	NA	NA	NA	NA	NA	NA	NA	NA	NA	NA
21002	1727	Weight	Ease of skin tanning	419316	6558	5e-06	2.09101904680153e-08	1751	158.037	0.0543	0.0650636	0.40428	NA	NA	NA	NA	NA	NA	NA	NA	NA	NA	NA	NA	NA	NA	NA	NA	NA	NA	NA	NA	NA	NA	NA	NA	NA	NA	NA	NA	NA	NA	NA	NA	NA	NA	NA	NA	NA
21002	1727	Weight	Ease of skin tanning	419316	6558	5e-05	3.48490544643809e-07	2435	187.145	0.0384	0.0586765	0.51285	30	1.12175	-3.43101	3.08043	0.26536	30	0.769331	1.09602	0.488514	30	-0.178074	0.143755	0.225378	30	-0.154113	0.0527679	0.00349374	30	-0.140669	0.0706055	0.0463358	30	5.49907341884648e-15	0.535326	NA	30	-0.16	0.241612	0.507831	30	-0.14041	0.0475823	0.00316855	30	-0.154113	0.0527679	0.00669757
21002	1747_5	Weight	Hair colour (natural	419316	6558	5e-07	1.31280386561627e-09	1251	131.426	-0.0169	0.0573673	0.76773	NA	NA	NA	NA	NA	NA	NA	NA	NA	NA	NA	NA	NA	NA	NA	NA	NA	NA	NA	NA	NA	NA	NA	NA	NA	NA	NA	NA	NA	NA	NA	NA	NA	NA	NA	NA	NA
21002	1747_5	Weight	Hair colour (natural	419316	6558	5e-06	2.09101904680153e-08	1751	159.638	-0.0199	0.0544225	0.71436	NA	NA	NA	NA	NA	NA	NA	NA	NA	NA	NA	NA	NA	NA	NA	NA	NA	NA	NA	NA	NA	NA	NA	NA	NA	NA	NA	NA	NA	NA	NA	NA	NA	NA	NA	NA	NA
21002	1747_5	Weight	Hair colour (natural	419316	6558	5e-05	3.48490544643809e-07	2435	188.766	-0.0011	0.0085964	0.8959	30	29.9962	-0.972104	0.6094	0.11067	30	1.2822	0.883527	0.157828	30	-0.0524443	0.136099	0.702798	30	-0.08239	0.0435616	0.058578	30	-0.0864223	0.0621582	0.164419	30	-0.061123	0.219785	0.360204	30	-0.085	0.139762	0.54307	30	-0.0909307	0.04795	0.0579117	30	-0.08239	0.0435616	0.0686045
23098	1727	Weight	Ease of skin tanning	413194	6458	5e-07	1.31001076653092e-09	1198	133.936	0.0537	0.0728101	0.46103	NA	NA	NA	NA	NA	NA	NA	NA	NA	NA	NA	NA	NA	NA	NA	NA	NA	NA	NA	NA	NA	NA	NA	NA	NA	NA	NA	NA	NA	NA	NA	NA	NA	NA	NA	NA	NA
23098	1727	Weight	Ease of skin tanning	413194	6458	5e-06	2.08689143743612e-08	1683	148.097	0.0663	0.0671775	0.32361	NA	NA	NA	NA	NA	NA	NA	NA	NA	NA	NA	NA	NA	NA	NA	NA	NA	NA	NA	NA	NA	NA	NA	NA	NA	NA	NA	NA	NA	NA	NA	NA	NA	NA	NA	NA	NA
23098	1727	Weight	Ease of skin tanning	413194	6458	5e-05	3.47861479399469e-07	2331	183.804	0.0314	0.0558729	0.57454	28	27.9958	-1.37475	0.65203	0.034995	28	1.45366	1.13901	0.213149	28	-0.124887	0.147581	0.404866	28	-0.106282	0.0521312	0.0414756	28	-0.108101	0.0739627	0.143862	28	3.68802210992669e-15	0.292144	NA	28	-0.11	0.0579027	0.0574676	28	-0.113594	0.050871	0.0255495	28	-0.106282	0.0462483	0.0295323
23098	1747_5	Weight	Hair colour (natural	413194	6458	5e-07	1.31001076653092e-09	1198	133.293	-0.0153	0.0570167	0.7887	NA	NA	NA	NA	NA	NA	NA	NA	NA	NA	NA	NA	NA	NA	NA	NA	NA	NA	NA	NA	NA	NA	NA	NA	NA	NA	NA	NA	NA	NA	NA	NA	NA	NA	NA	NA	NA
23098	1747_5	Weight	Hair colour (natural	413194	6458	5e-06	2.08689143743612e-08	1683	148.628	-0.0346	0.0579057	0.54988	NA	NA	NA	NA	NA	NA	NA	NA	NA	NA	NA	NA	NA	NA	NA	NA	NA	NA	NA	NA	NA	NA	NA	NA	NA	NA	NA	NA	NA	NA	NA	NA	NA	NA	NA	NA	NA
23098	1747_5	Weight	Hair colour (natural	413194	6458	5e-05	3.47861479399469e-07	2331	182.141	-0.0075	0.0328376	0.8197	28	27.9964	-1.29875	0.953349	0.1731	28	1.15488	1.00759	0.262158	28	-0.0662788	0.137909	0.634673	28	-0.0922593	0.046571	0.0475862	28	-0.0904199	0.0634505	0.154144	28	-0.0778439	0.225494	0.238921	28	-0.23	0.341122	0.500155	28	-0.101159	0.0508217	0.0465398	28	-0.0922593	0.046571	0.0578559
23099	1727	Body fat percentage	Ease of skin tanning	412960	6455	5e-07	1.3104424212429e-09	883	62.0571	0.0404	0.107067	0.70562	NA	NA	NA	NA	NA	NA	NA	NA	NA	NA	NA	NA	NA	NA	NA	NA	NA	NA	NA	NA	NA	NA	NA	NA	NA	NA	NA	NA	NA	NA	NA	NA	NA	NA	NA	NA	NA
23099	1727	Body fat percentage	Ease of skin tanning	412960	6455	5e-06	2.08752941599499e-08	1274	73.706	0.0564	0.101329	0.57746	4	0.688609	-0.0964023	0.409172	0.81374	4	-2.92375	2.02725	0.285994	4	-0.0503753	0.208106	0.824334	4	0.117701	0.120218	0.327549	4	0.0520831	0.149068	0.726796	4	0.00594836	0.188083	0.999979	4	0.125	0.124879	0.316843	4	0.117223	0.110761	0.2899	4	0.117701	0.119507	0.397301
23099	1727	Body fat percentage	Ease of skin tanning	412960	6455	5e-05	3.47958714952412e-07	1917	101.578	0.084	0.0954112	0.37866	38	16.359	-0.272655	0.362827	0.45237	38	-0.867048	0.7963	0.283457	38	0.218105	0.156148	0.170802	38	0.0438207	0.0458766	0.339484	38	0.106175	0.0657297	0.10624	38	-5.48173e-15	0.283478	NA	38	0.05	0.0513586	0.330282	38	0.0547027	0.0543632	0.314298	38	0.0438207	0.0458766	0.345683
23099	1747_5	Body fat percentage	Hair colour (natural	412960	6455	5e-07	1.3104424212429e-09	883	61.8294	-0.0538	0.0879692	0.54119	NA	NA	NA	NA	NA	NA	NA	NA	NA	NA	NA	NA	NA	NA	NA	NA	NA	NA	NA	NA	NA	NA	NA	NA	NA	NA	NA	NA	NA	NA	NA	NA	NA	NA	NA	NA	NA
23099	1747_5	Body fat percentage	Hair colour (natural	412960	6455	5e-06	2.08752941599499e-08	1274	73.5363	-0.0158	0.0713707	0.82434	4	0.740497	0.0102026	0.409125	0.9801	4	-1.55643	1.71617	0.460175	4	-0.0365051	0.163644	0.837803	4	0.0636648	0.10177	0.531595	4	0.0234829	0.124847	0.850803	4	0.00737413	0.137132	0.999813	4	0.065	0.102854	0.527412	4	0.0618662	0.0753878	0.411852	4	0.0636648	0.0812671	0.490548
23099	1747_5	Body fat percentage	Hair colour (natural	412960	6455	5e-05	3.47958714952412e-07	1917	102.501	-0.023	0.0649288	0.7236	38	34.4182	0.151762	0.303443	0.61698	38	-0.195694	0.723797	0.788419	38	0.00849538	0.112162	0.940033	38	0.013279	0.041007	0.746072	38	0.0219865	0.0525741	0.675802	38	0.0555947	0.248368	0.913639	38	0.13	0.156696	0.406746	38	0.0196028	0.0418645	0.639611	38	0.013279	0.041007	0.747896
23100	1727	Whole body fat mass	Ease of skin tanning	412524	6450	5e-07	1.31163613303897e-09	1066	83.2537	0.0948	0.0922536	0.30424	NA	NA	NA	NA	NA	NA	NA	NA	NA	NA	NA	NA	NA	NA	NA	NA	NA	NA	NA	NA	NA	NA	NA	NA	NA	NA	NA	NA	NA	NA	NA	NA	NA	NA	NA	NA	NA
23100	1727	Whole body fat mass	Ease of skin tanning	412524	6450	5e-06	2.08929349376774e-08	1532	108.482	0.0952	0.0855011	0.26562	NA	NA	NA	NA	NA	NA	NA	NA	NA	NA	NA	NA	NA	NA	NA	NA	NA	NA	NA	NA	NA	NA	NA	NA	NA	NA	NA	NA	NA	NA	NA	NA	NA	NA	NA	NA	NA
23100	1727	Whole body fat mass	Ease of skin tanning	412524	6450	5e-05	3.48227576996152e-07	2235	137.668	0.0936	0.0776919	0.22852	33	32.9049	-1.32477	1.41256	0.34832	33	0.778114	0.9162	0.402235	33	-0.129699	0.154922	0.408697	33	-0.0279926	0.0487359	0.565715	33	-0.0629101	0.0705963	0.372863	33	3.37577188425087e-15	0.303517	NA	33	-0.025	0.67227	0.970336	33	-0.0303233	0.0515814	0.556618	33	-0.0279926	0.0487359	0.569731
23100	1747_5	Whole body fat mass	Hair colour (natural	412524	6450	5e-07	1.31163613303897e-09	1066	83.1983	-0.0549	0.0756225	0.46814	NA	NA	NA	NA	NA	NA	NA	NA	NA	NA	NA	NA	NA	NA	NA	NA	NA	NA	NA	NA	NA	NA	NA	NA	NA	NA	NA	NA	NA	NA	NA	NA	NA	NA	NA	NA	NA
23100	1747_5	Whole body fat mass	Hair colour (natural	412524	6450	5e-06	2.08929349376774e-08	1532	109.219	-0.0793	0.0729855	0.27713	NA	NA	NA	NA	NA	NA	NA	NA	NA	NA	NA	NA	NA	NA	NA	NA	NA	NA	NA	NA	NA	NA	NA	NA	NA	NA	NA	NA	NA	NA	NA	NA	NA	NA	NA	NA	NA
23100	1747_5	Whole body fat mass	Hair colour (natural	412524	6450	5e-05	3.48227576996152e-07	2235	138.238	-0.0754	0.06826	0.26964	33	0.00456535	0.00376453	1.22369	0.99755	33	-0.173993	0.868037	0.842442	33	-0.031665	0.136425	0.817933	33	-0.0318767	0.0456262	0.484771	33	-0.0333153	0.0598958	0.578059	33	-0.0428855	0.282411	0.698624	33	2.00936105613651e-17	0.0695537	1	33	-0.0283367	0.0489309	0.562511	33	-0.0318767	0.0456262	0.489818
23101	1727	Whole body fat-free mass	Ease of skin tanning	413158	6456	5e-07	1.3090672990046e-09	1490	201.557	-0.0253	0.0557383	0.64983	NA	NA	NA	NA	NA	NA	NA	NA	NA	NA	NA	NA	NA	NA	NA	NA	NA	NA	NA	NA	NA	NA	NA	NA	NA	NA	NA	NA	NA	NA	NA	NA	NA	NA	NA	NA	NA
23101	1727	Whole body fat-free mass	Ease of skin tanning	413158	6456	5e-06	2.08549737479302e-08	1938	231.264	-0.0568	0.0554545	0.3061	4	3.99943	-1.73017	3.54542	0.62555	4	1.65305	8.68274	0.866582	4	0.0044344	0.216397	0.984938	4	-0.0151194	0.126076	0.904544	4	-0.00737566	0.149071	0.960539	4	-2.50668e-16	0.136712	NA	4	-0.015	0.127696	0.906491	4	-0.0141048	0.0896257	0.874949	4	-0.0151194	0.0994624	0.888826
23101	1727	Whole body fat-free mass	Ease of skin tanning	413158	6456	5e-05	3.47648990928207e-07	2627	271.281	-0.0381	0.0477154	0.42494	45	44.9915	-1.55416	0.73794	0.035198	45	0.797911	1.04995	0.451432	45	-0.0801166	0.137349	0.562664	45	-0.107214	0.0433542	0.013399	45	-0.0588456	0.0611185	0.335642	45	-4.76355e-15	0.365967	NA	45	-0.11	0.0605553	0.0692906	45	-0.100823	0.0453043	0.0260502	45	-0.107214	0.0433542	0.017333
23101	1747_5	Whole body fat-free mass	Hair colour (natural	413158	6456	5e-07	1.3090672990046e-09	1490	200.565	-0.039	0.051859	0.45209	NA	NA	NA	NA	NA	NA	NA	NA	NA	NA	NA	NA	NA	NA	NA	NA	NA	NA	NA	NA	NA	NA	NA	NA	NA	NA	NA	NA	NA	NA	NA	NA	NA	NA	NA	NA	NA
23101	1747_5	Whole body fat-free mass	Hair colour (natural	413158	6456	5e-06	2.08549737479302e-08	1938	228.886	-0.057	0.0493307	0.24822	4	3.99955	-2.19568	3.01731	0.4668	4	14.4154	7.35036	0.188891	4	-0.208074	0.219173	0.412478	4	-0.0453856	0.129498	0.725982	4	-0.111459	0.13164	0.397166	4	-0.00380716	0.151378	1	4	-0.2	0.18965	0.29162	4	-0.0552214	0.140352	0.693989	4	-0.0453856	0.129498	0.749147
23101	1747_5	Whole body fat-free mass	Hair colour (natural	413158	6456	5e-05	3.47648990928207e-07	2627	269.613	-0.0457	0.0423392	0.28004	45	44.9934	-0.957703	0.946645	0.31169	45	1.14475	0.842611	0.181365	45	-0.0278283	0.117604	0.814045	45	-0.0601757	0.0351146	0.0865848	45	-0.037588	0.05024	0.454358	45	-0.110023	0.228061	0.471851	45	-0.065	0.0453526	0.151797	45	-0.0648695	0.0365174	0.075667	45	-0.0601757	0.0351146	0.0936228
23102	1727	Whole body water mass	Ease of skin tanning	413190	6458	5e-07	1.31005162273823e-09	1450	199.456	-0.0111	0.0495139	0.82281	NA	NA	NA	NA	NA	NA	NA	NA	NA	NA	NA	NA	NA	NA	NA	NA	NA	NA	NA	NA	NA	NA	NA	NA	NA	NA	NA	NA	NA	NA	NA	NA	NA	NA	NA	NA	NA
23102	1727	Whole body water mass	Ease of skin tanning	413190	6458	5e-06	2.08695207781773e-08	1885	231.38	-0.0338	0.05332	0.52655	4	3.99929	-1.51977	3.16318	0.6309	4	-11.8563	7.71436	0.26413	4	0.188037	0.216304	0.448637	4	0.0373377	0.126544	0.767951	4	0.0957924	0.148777	0.519663	4	-3.25261e-16	0.133655	NA	4	0.04	0.131825	0.761561	4	0.0449149	0.12071	0.709827	4	0.0373377	0.113376	0.763561
23102	1727	Whole body water mass	Ease of skin tanning	413190	6458	5e-05	3.47870722228194e-07	2584	273.82	-0.0328	0.0485485	0.49952	42	41.9913	-1.23001	0.548053	0.024811	42	-0.0268687	1.07871	0.980252	42	-0.0364208	0.133844	0.7869	42	-0.096939	0.0444418	0.0291646	42	-0.0437826	0.0625021	0.483616	42	7.56686380221083e-15	0.365273	NA	42	-0.1	0.0576125	0.082611	42	-0.0913685	0.0472735	0.0532654	42	-0.096939	0.0444418	0.0349543
23102	1747_5	Whole body water mass	Hair colour (natural	413190	6458	5e-07	1.31005162273823e-09	1450	198.919	-0.0419	0.0507014	0.40827	NA	NA	NA	NA	NA	NA	NA	NA	NA	NA	NA	NA	NA	NA	NA	NA	NA	NA	NA	NA	NA	NA	NA	NA	NA	NA	NA	NA	NA	NA	NA	NA	NA	NA	NA	NA	NA
23102	1747_5	Whole body water mass	Hair colour (natural	413190	6458	5e-06	2.08695207781773e-08	1885	228.986	-0.0448	0.0462064	0.33243	4	3.99939	24.3039	123.831	0.8444	4	-10.2297	9.16475	0.380451	4	0.261351	0.248972	0.370951	4	0.108992	0.157026	0.487618	4	0.110375	0.13997	0.430368	4	0.0486606	0.221346	0.483853	4	0.38	0.272809	0.163646	4	0.111256	0.145997	0.446035	4	0.108992	0.157026	0.537538
23102	1747_5	Whole body water mass	Hair colour (natural	413190	6458	5e-05	3.47870722228194e-07	2584	271.097	-0.0274	0.0394597	0.48795	42	41.993	-0.906342	0.58739	0.12283	42	0.979066	0.88012	0.272597	42	-0.0363714	0.113435	0.750114	42	-0.0723651	0.0369004	0.0498682	42	-0.0562025	0.0517031	0.277026	42	-0.2363	0.277668	0.326848	42	-0.08	0.158292	0.613282	42	-0.0731505	0.0397909	0.0660073	42	-0.0723651	0.0369004	0.0566843
23105	1727	Basal metabolic rate	Ease of skin tanning	413178	6458	5e-07	1.31017485749396e-09	1409	192.307	-0.0216	0.0568483	0.70462	NA	NA	NA	NA	NA	NA	NA	NA	NA	NA	NA	NA	NA	NA	NA	NA	NA	NA	NA	NA	NA	NA	NA	NA	NA	NA	NA	NA	NA	NA	NA	NA	NA	NA	NA	NA	NA
23105	1727	Basal metabolic rate	Ease of skin tanning	413178	6458	5e-06	2.087134021167e-08	1872	209.616	-0.011	0.0440173	0.80332	NA	NA	NA	NA	NA	NA	NA	NA	NA	NA	NA	NA	NA	NA	NA	NA	NA	NA	NA	NA	NA	NA	NA	NA	NA	NA	NA	NA	NA	NA	NA	NA	NA	NA	NA	NA	NA
23105	1727	Basal metabolic rate	Ease of skin tanning	413178	6458	5e-05	3.4789845226868e-07	2581	250.359	-0.009	0.0358482	0.80267	42	41.9912	-1.22764	0.470787	0.0091172	42	0.29875	1.17729	0.80098	42	-0.0525711	0.139718	0.70866	42	-0.116045	0.0429532	0.00689948	42	-0.0707443	0.0613951	0.249207	42	-0.396881	0.335899	0.0316658	42	-0.13	0.115399	0.259942	42	-0.111208	0.0457632	0.0150959	42	-0.116045	0.0429532	0.0099879
23105	1747_5	Basal metabolic rate	Hair colour (natural	413178	6458	5e-07	1.31017485749396e-09	1409	192.244	-0.0702	0.0539353	0.19306	NA	NA	NA	NA	NA	NA	NA	NA	NA	NA	NA	NA	NA	NA	NA	NA	NA	NA	NA	NA	NA	NA	NA	NA	NA	NA	NA	NA	NA	NA	NA	NA	NA	NA	NA	NA	NA
23105	1747_5	Basal metabolic rate	Hair colour (natural	413178	6458	5e-06	2.087134021167e-08	1872	208.576	-0.0664	0.0517107	0.19903	NA	NA	NA	NA	NA	NA	NA	NA	NA	NA	NA	NA	NA	NA	NA	NA	NA	NA	NA	NA	NA	NA	NA	NA	NA	NA	NA	NA	NA	NA	NA	NA	NA	NA	NA	NA	NA
23105	1747_5	Basal metabolic rate	Hair colour (natural	413178	6458	5e-05	3.4789845226868e-07	2581	248.797	-0.0518	0.0456332	0.25668	42	12.0855	-4.06348	3.27381	0.21453	42	-0.260672	1.10074	0.814009	42	-0.0455371	0.107037	0.672746	42	-0.0731797	0.0401127	0.0680985	42	-0.0531355	0.0519412	0.306311	42	-0.247905	0.323626	0.241666	42	-0.01	0.16892	0.952793	42	-0.0680084	0.0430871	0.114475	42	-0.0731797	0.0401127	0.075392
23106	1727	Impedance of whole body	Ease of skin tanning	413153	6458	5e-07	1.31043131901265e-09	1195	132.014	-0.0417	0.0686046	0.5433	NA	NA	NA	NA	NA	NA	NA	NA	NA	NA	NA	NA	NA	NA	NA	NA	NA	NA	NA	NA	NA	NA	NA	NA	NA	NA	NA	NA	NA	NA	NA	NA	NA	NA	NA	NA	NA
23106	1727	Impedance of whole body	Ease of skin tanning	413153	6458	5e-06	2.08751311792099e-08	1621	152.367	-0.0304	0.0530914	0.567	NA	NA	NA	NA	NA	NA	NA	NA	NA	NA	NA	NA	NA	NA	NA	NA	NA	NA	NA	NA	NA	NA	NA	NA	NA	NA	NA	NA	NA	NA	NA	NA	NA	NA	NA	NA	NA
23106	1727	Impedance of whole body	Ease of skin tanning	413153	6458	5e-05	3.47956231605551e-07	2284	215.457	-0.0461	0.0526444	0.38168	27	26.9932	-0.099581	1.0018	0.92082	27	-1.61869	1.56839	0.311921	27	-0.0372079	0.135641	0.786014	27	0.0106902	0.0670461	0.873317	27	-0.0463897	0.0742054	0.531871	27	3.52842755013683e-15	0.465328	NA	27	0.03	0.344455	0.930597	27	-0.0154478	0.0860015	0.857449	27	0.0106902	0.0670461	0.874549
23106	1747_5	Impedance of whole body	Hair colour (natural	413153	6458	5e-07	1.31043131901265e-09	1195	131.903	-0.0635	0.0675313	0.34714	NA	NA	NA	NA	NA	NA	NA	NA	NA	NA	NA	NA	NA	NA	NA	NA	NA	NA	NA	NA	NA	NA	NA	NA	NA	NA	NA	NA	NA	NA	NA	NA	NA	NA	NA	NA	NA
23106	1747_5	Impedance of whole body	Hair colour (natural	413153	6458	5e-06	2.08751311792099e-08	1621	154.232	-0.0448	0.0595223	0.45151	NA	NA	NA	NA	NA	NA	NA	NA	NA	NA	NA	NA	NA	NA	NA	NA	NA	NA	NA	NA	NA	NA	NA	NA	NA	NA	NA	NA	NA	NA	NA	NA	NA	NA	NA	NA	NA
23106	1747_5	Impedance of whole body	Hair colour (natural	413153	6458	5e-05	3.47956231605551e-07	2284	218.654	-0.0246	0.0468207	0.59873	27	26.9904	-0.258942	0.417063	0.53468	27	1.7212	1.05972	0.116876	27	0.0440376	0.13083	0.739119	27	-0.0610038	0.0452306	0.177424	27	-0.0526807	0.0628522	0.401936	27	-0.085686	0.246535	0.325267	27	-0.065	0.0492354	0.186772	27	-0.0609221	0.043521	0.161564	27	-0.0610038	0.0417982	0.156409
23109	1727	Impedance of arm (right)	Ease of skin tanning	413141	6458	5e-07	1.31055455376838e-09	1163	130.754	-0.0212	0.0503784	0.67432	NA	NA	NA	NA	NA	NA	NA	NA	NA	NA	NA	NA	NA	NA	NA	NA	NA	NA	NA	NA	NA	NA	NA	NA	NA	NA	NA	NA	NA	NA	NA	NA	NA	NA	NA	NA	NA
23109	1727	Impedance of arm (right)	Ease of skin tanning	413141	6458	5e-06	2.08769510567919e-08	1561	151.605	0.01	0.0575718	0.86255	NA	NA	NA	NA	NA	NA	NA	NA	NA	NA	NA	NA	NA	NA	NA	NA	NA	NA	NA	NA	NA	NA	NA	NA	NA	NA	NA	NA	NA	NA	NA	NA	NA	NA	NA	NA	NA
23109	1727	Impedance of arm (right)	Ease of skin tanning	413141	6458	5e-05	3.47983969639643e-07	2244	172.178	0.0363	0.0618565	0.55746	33	32.9662	14.1757	23.8352	0.55202	33	1.16402	1.17797	0.330725	33	0.0190011	0.149072	0.899372	33	0.0705209	0.0545502	0.19609	33	0.0284145	0.0694184	0.682303	33	-1.11022e-16	0.456647	NA	33	0.14	0.0734041	0.056488	33	0.0830356	0.0510716	0.103978	33	0.0705209	0.0545502	0.205347
23109	1747_5	Impedance of arm (right)	Hair colour (natural	413141	6458	5e-07	1.31055455376838e-09	1163	131.73	-0.0361	0.0635047	0.56977	NA	NA	NA	NA	NA	NA	NA	NA	NA	NA	NA	NA	NA	NA	NA	NA	NA	NA	NA	NA	NA	NA	NA	NA	NA	NA	NA	NA	NA	NA	NA	NA	NA	NA	NA	NA	NA
23109	1747_5	Impedance of arm (right)	Hair colour (natural	413141	6458	5e-06	2.08769510567919e-08	1561	153.878	-0.0239	0.0590692	0.6858	NA	NA	NA	NA	NA	NA	NA	NA	NA	NA	NA	NA	NA	NA	NA	NA	NA	NA	NA	NA	NA	NA	NA	NA	NA	NA	NA	NA	NA	NA	NA	NA	NA	NA	NA	NA	NA
23109	1747_5	Impedance of arm (right)	Hair colour (natural	413141	6458	5e-05	3.47983969639643e-07	2244	175.064	-0.0111	0.0434113	0.79883	33	0.00390712	-0.0994809	11.87	0.99331	33	-0.587384	0.871983	0.505545	33	0.101073	0.128345	0.436778	33	0.000601592	0.0404666	0.988139	33	0.029585	0.0588482	0.615151	33	-0.015511	0.237411	1	33	2.92135422212607e-17	0.0440957	1	33	0.0022494	0.0396549	0.954765	33	0.000601592	0.0376683	0.987357
23110	1727	Impedance of arm (left)	Ease of skin tanning	413157	6458	5e-07	1.31039024076074e-09	1056	121.33	0.0445	0.0812806	0.58364	NA	NA	NA	NA	NA	NA	NA	NA	NA	NA	NA	NA	NA	NA	NA	NA	NA	NA	NA	NA	NA	NA	NA	NA	NA	NA	NA	NA	NA	NA	NA	NA	NA	NA	NA	NA	NA
23110	1727	Impedance of arm (left)	Ease of skin tanning	413157	6458	5e-06	2.08745245533493e-08	1450	129.93	0.0861	0.0800901	0.28232	NA	NA	NA	NA	NA	NA	NA	NA	NA	NA	NA	NA	NA	NA	NA	NA	NA	NA	NA	NA	NA	NA	NA	NA	NA	NA	NA	NA	NA	NA	NA	NA	NA	NA	NA	NA	NA
23110	1727	Impedance of arm (left)	Ease of skin tanning	413157	6458	5e-05	3.47946986334335e-07	2050	155.645	0.1111	0.0695611	0.1103	28	0.00289125	0.028348	6.47552	0.99651	28	-0.373463	1.07561	0.731227	28	0.0463258	0.139381	0.742177	28	0.056968	0.05206	0.273834	28	0.0541161	0.0690913	0.433478	28	4.79477568759989e-15	0.247097	NA	28	0.06	0.0550663	0.275891	28	0.0611688	0.0597131	0.305657	28	0.056968	0.0419586	0.185793
23110	1747_5	Impedance of arm (left)	Hair colour (natural	413157	6458	5e-07	1.31039024076074e-09	1056	120.754	-0.047	0.0624127	0.4512	NA	NA	NA	NA	NA	NA	NA	NA	NA	NA	NA	NA	NA	NA	NA	NA	NA	NA	NA	NA	NA	NA	NA	NA	NA	NA	NA	NA	NA	NA	NA	NA	NA	NA	NA	NA	NA
23110	1747_5	Impedance of arm (left)	Hair colour (natural	413157	6458	5e-06	2.08745245533493e-08	1450	129.455	-0.0531	0.0624258	0.39502	NA	NA	NA	NA	NA	NA	NA	NA	NA	NA	NA	NA	NA	NA	NA	NA	NA	NA	NA	NA	NA	NA	NA	NA	NA	NA	NA	NA	NA	NA	NA	NA	NA	NA	NA	NA	NA
23110	1747_5	Impedance of arm (left)	Hair colour (natural	413157	6458	5e-05	3.47946986334335e-07	2050	152.427	-0.025	0.0533272	0.63856	28	13.1686	-1.79709	1.91897	0.34902	28	0.398962	0.920386	0.668247	28	-0.0450285	0.123204	0.717601	28	-0.0692792	0.0440713	0.115955	28	-0.0544798	0.0618266	0.378225	28	-0.0797373	0.254591	0.142428	28	-0.07	0.0510892	0.17064	28	-0.0690603	0.0452383	0.126863	28	-0.0692792	0.043932	0.12645
23113	1727	Leg fat-free mass (right)	Ease of skin tanning	413147	6458	5e-07	1.31049282536821e-09	1350	164.611	-0.0185	0.0618039	0.76478	NA	NA	NA	NA	NA	NA	NA	NA	NA	NA	NA	NA	NA	NA	NA	NA	NA	NA	NA	NA	NA	NA	NA	NA	NA	NA	NA	NA	NA	NA	NA	NA	NA	NA	NA	NA	NA
23113	1727	Leg fat-free mass (right)	Ease of skin tanning	413147	6458	5e-06	2.08760411180009e-08	1814	200.152	0	0.000279123	0.94921	6	5.99782	-2.01202	4.04982	0.61932	6	7.20557	12.6342	0.598967	6	0.0409114	0.195705	0.842662	6	-0.0578764	0.103926	0.577597	6	-0.0321302	0.126406	0.799354	6	-2.12937e-15	0.138192	NA	6	-0.06	0.104037	0.564129	6	-0.0563812	0.0761462	0.459036	6	-0.0578764	0.0714011	0.454442
23113	1727	Leg fat-free mass (right)	Ease of skin tanning	413147	6458	5e-05	3.4797010028953e-07	2450	253.819	-0.005	0.0288478	0.86221	35	34.9958	-0.381192	0.224151	0.089017	35	1.49797	1.08459	0.176518	35	0.0679726	0.124636	0.589061	35	-0.0592145	0.0459578	0.197588	35	-0.00532464	0.065389	0.9351	35	-0.153487	0.339064	0.481506	35	-0.07	0.0640553	0.274479	35	-0.0426799	0.051892	0.410807	35	-0.0592145	0.0438778	0.186084
23113	1747_5	Leg fat-free mass (right)	Hair colour (natural	413147	6458	5e-07	1.31049282536821e-09	1350	163.652	0.0171	0.0515844	0.74084	NA	NA	NA	NA	NA	NA	NA	NA	NA	NA	NA	NA	NA	NA	NA	NA	NA	NA	NA	NA	NA	NA	NA	NA	NA	NA	NA	NA	NA	NA	NA	NA	NA	NA	NA	NA	NA
23113	1747_5	Leg fat-free mass (right)	Hair colour (natural	413147	6458	5e-06	2.08760411180009e-08	1814	198.108	-0.0021	0.0178739	0.90671	6	0.000680164	-1.39898	214.777	0.9948	6	26.5483	10.6955	0.0680506	6	-0.0389013	0.218944	0.865951	6	0.040243	0.109768	0.713904	6	0.0347795	0.121506	0.774697	6	0.0173066	0.18369	0.552219	6	2.00936105613651e-17	0.245802	1	6	0.04003	0.107176	0.708779	6	0.040243	0.109768	0.728907
23113	1747_5	Leg fat-free mass (right)	Hair colour (natural	413147	6458	5e-05	3.4797010028953e-07	2450	252.218	0.0044	0.019932	0.82626	35	34.9957	-0.192232	0.198267	0.33226	35	0.709612	0.918155	0.445102	35	-0.0327722	0.119274	0.785159	35	-0.0365286	0.0389055	0.347778	35	-0.0270478	0.0534752	0.612996	35	-0.0291023	0.216665	0.998347	35	-0.04	0.0427968	0.34997	35	-0.0376909	0.0418629	0.367939	35	-0.0365286	0.0360625	0.31825
23114	1727	Leg predicted mass (right)	Ease of skin tanning	413146	6458	5e-07	1.31050326146465e-09	1358	165.84	-0.0078	0.0490784	0.87395	NA	NA	NA	NA	NA	NA	NA	NA	NA	NA	NA	NA	NA	NA	NA	NA	NA	NA	NA	NA	NA	NA	NA	NA	NA	NA	NA	NA	NA	NA	NA	NA	NA	NA	NA	NA	NA
23114	1727	Leg predicted mass (right)	Ease of skin tanning	413146	6458	5e-06	2.08761927744661e-08	1823	206.384	0.0022	0.0161755	0.89368	5	0.000511764	-0.667916	162.328	0.99672	5	3.63498	15.8206	0.833051	5	0.0462714	0.176542	0.80619	5	-0.0161771	0.113668	0.886828	5	-1.31315e-05	0.153961	0.999932	5	3.00020425170189e-15	0.132494	NA	5	-0.015	0.112916	0.894318	5	-0.0106261	0.1023	0.917271	5	-0.0161771	0.0705212	0.829815
23114	1727	Leg predicted mass (right)	Ease of skin tanning	413146	6458	5e-05	3.47972411773867e-07	2490	258.571	-0.0008	0.00744532	0.91501	36	35.9951	-0.477908	0.263856	0.070103	36	1.23247	1.10742	0.273547	36	0.0531878	0.120828	0.662503	36	-0.0663071	0.0464697	0.153612	36	-0.000503804	0.0654665	0.99386	36	1.01203767588487e-14	0.379653	NA	36	-0.08	0.0559738	0.152935	36	-0.0431087	0.0566583	0.446744	36	-0.0663071	0.0464697	0.162473
23114	1747_5	Leg predicted mass (right)	Hair colour (natural	413146	6458	5e-07	1.31050326146465e-09	1358	165.206	0.0108	0.0449778	0.8102	NA	NA	NA	NA	NA	NA	NA	NA	NA	NA	NA	NA	NA	NA	NA	NA	NA	NA	NA	NA	NA	NA	NA	NA	NA	NA	NA	NA	NA	NA	NA	NA	NA	NA	NA	NA	NA
23114	1747_5	Leg predicted mass (right)	Hair colour (natural	413146	6458	5e-06	2.08761927744661e-08	1823	204.174	0.0123	0.0408544	0.76358	5	1.2404	1.95498	3.35487	0.56007	5	27.642	13.3929	0.131002	5	0.171846	0.21112	0.46134	5	0.100574	0.111582	0.367403	5	0.0893628	0.13278	0.50094	5	0.0275894	0.183998	0.365267	5	0.11	0.103221	0.286571	5	0.103646	0.107196	0.333602	5	0.100574	0.111582	0.418368
23114	1747_5	Leg predicted mass (right)	Hair colour (natural	413146	6458	5e-05	3.47972411773867e-07	2490	256.151	0.0045	0.0213717	0.83208	36	35.9947	-0.281787	0.235311	0.23111	36	1.19531	0.921846	0.203483	36	-0.0372062	0.112615	0.743079	36	-0.0545176	0.0384756	0.156501	36	-0.0354362	0.0550347	0.519648	36	-0.0556978	0.218943	0.836441	36	-0.055	0.0425315	0.195956	36	-0.0589428	0.041488	0.155398	36	-0.0545176	0.0352072	0.130502
23117	1727	Leg fat-free mass (left)	Ease of skin tanning	413118	6455	5e-07	1.30882127358234e-09	1389	167.266	-0.0596	0.0649361	0.35898	NA	NA	NA	NA	NA	NA	NA	NA	NA	NA	NA	NA	NA	NA	NA	NA	NA	NA	NA	NA	NA	NA	NA	NA	NA	NA	NA	NA	NA	NA	NA	NA	NA	NA	NA	NA	NA
23117	1727	Leg fat-free mass (left)	Ease of skin tanning	413118	6455	5e-06	2.08513373234354e-08	1835	186.103	-0.0361	0.0607232	0.55212	NA	NA	NA	NA	NA	NA	NA	NA	NA	NA	NA	NA	NA	NA	NA	NA	NA	NA	NA	NA	NA	NA	NA	NA	NA	NA	NA	NA	NA	NA	NA	NA	NA	NA	NA	NA	NA
23117	1727	Leg fat-free mass (left)	Ease of skin tanning	413118	6455	5e-05	3.47593562377568e-07	2543	243.227	-0.027	0.0504519	0.59252	37	36.9658	-0.864657	0.473871	0.068052	37	-0.0153284	1.1306	0.98926	37	0.0591136	0.120961	0.628019	37	-0.0640908	0.0452098	0.156299	37	-0.000234576	0.0619482	0.996979	37	-0.173872	0.341959	0.287296	37	-0.08	0.0980539	0.41457	37	-0.0276311	0.0660428	0.675669	37	-0.0640908	0.0440638	0.154472
23117	1747_5	Leg fat-free mass (left)	Hair colour (natural	413118	6455	5e-07	1.30882127358234e-09	1389	166.177	-0.0218	0.0562745	0.69867	NA	NA	NA	NA	NA	NA	NA	NA	NA	NA	NA	NA	NA	NA	NA	NA	NA	NA	NA	NA	NA	NA	NA	NA	NA	NA	NA	NA	NA	NA	NA	NA	NA	NA	NA	NA	NA
23117	1747_5	Leg fat-free mass (left)	Hair colour (natural	413118	6455	5e-06	2.08513373234354e-08	1835	184.177	-0.0245	0.0511421	0.63233	NA	NA	NA	NA	NA	NA	NA	NA	NA	NA	NA	NA	NA	NA	NA	NA	NA	NA	NA	NA	NA	NA	NA	NA	NA	NA	NA	NA	NA	NA	NA	NA	NA	NA	NA	NA	NA
23117	1747_5	Leg fat-free mass (left)	Hair colour (natural	413118	6455	5e-05	3.47593562377568e-07	2543	241.74	-0.0468	0.0486741	0.33679	37	36.9302	-0.511427	0.495464	0.30197	37	-0.0820535	0.957104	0.932169	37	-0.058857	0.118749	0.623159	37	-0.048114	0.0382723	0.2087	37	-0.051279	0.0540576	0.342825	37	-0.0405276	0.213558	0.843684	37	-0.05	0.0422188	0.236292	37	-0.0523512	0.042353	0.216433	37	-0.048114	0.0349229	0.176795
23118	1727	Leg predicted mass (left)	Ease of skin tanning	413113	6455	5e-07	1.30887256588608e-09	1333	159.164	0.0059	0.0391582	0.88046	NA	NA	NA	NA	NA	NA	NA	NA	NA	NA	NA	NA	NA	NA	NA	NA	NA	NA	NA	NA	NA	NA	NA	NA	NA	NA	NA	NA	NA	NA	NA	NA	NA	NA	NA	NA	NA
23118	1727	Leg predicted mass (left)	Ease of skin tanning	413113	6455	5e-06	2.08520949396274e-08	1782	186.805	0.0037	0.0236967	0.87674	NA	NA	NA	NA	NA	NA	NA	NA	NA	NA	NA	NA	NA	NA	NA	NA	NA	NA	NA	NA	NA	NA	NA	NA	NA	NA	NA	NA	NA	NA	NA	NA	NA	NA	NA	NA	NA
23118	1727	Leg predicted mass (left)	Ease of skin tanning	413113	6455	5e-05	3.4760511091747e-07	2463	237.273	-0.0046	0.0269836	0.86398	37	36.9934	-1.38459	0.743587	0.062596	37	-0.0484499	1.20338	0.968113	37	0.0802397	0.130091	0.541249	37	-0.0638338	0.0467204	0.171846	37	0.00370798	0.0647917	0.954363	37	-0.16993	0.352738	0.220013	37	0	0.146855	1	37	-0.0282012	0.0699667	0.686899	37	-0.0638338	0.0467204	0.18032
23118	1747_5	Leg predicted mass (left)	Hair colour (natural	413113	6455	5e-07	1.30887256588608e-09	1333	158.278	-0.0398	0.0592863	0.50195	NA	NA	NA	NA	NA	NA	NA	NA	NA	NA	NA	NA	NA	NA	NA	NA	NA	NA	NA	NA	NA	NA	NA	NA	NA	NA	NA	NA	NA	NA	NA	NA	NA	NA	NA	NA	NA
23118	1747_5	Leg predicted mass (left)	Hair colour (natural	413113	6455	5e-06	2.08520949396274e-08	1782	184.368	-0.0214	0.0516185	0.67829	NA	NA	NA	NA	NA	NA	NA	NA	NA	NA	NA	NA	NA	NA	NA	NA	NA	NA	NA	NA	NA	NA	NA	NA	NA	NA	NA	NA	NA	NA	NA	NA	NA	NA	NA	NA	NA
23118	1747_5	Leg predicted mass (left)	Hair colour (natural	413113	6455	5e-05	3.4760511091747e-07	2463	236.355	-0.0569	0.0503833	0.25892	37	36.9153	-0.804116	0.802032	0.31605	37	-0.0392955	0.974597	0.968067	37	-0.0559993	0.119309	0.64164	37	-0.0508291	0.0383747	0.185322	37	-0.0419339	0.0550021	0.445818	37	-0.0392964	0.218295	0.763783	37	-0.05	0.0429205	0.244041	37	-0.0532125	0.0388482	0.170764	37	-0.0508291	0.0365694	0.173084
23119	1727	Arm fat percentage (right)	Ease of skin tanning	413107	6454	5e-07	1.30827793043409e-09	845	71.029	0.0501	0.0966765	0.60458	NA	NA	NA	NA	NA	NA	NA	NA	NA	NA	NA	NA	NA	NA	NA	NA	NA	NA	NA	NA	NA	NA	NA	NA	NA	NA	NA	NA	NA	NA	NA	NA	NA	NA	NA	NA	NA
23119	1727	Arm fat percentage (right)	Ease of skin tanning	413107	6454	5e-06	2.08433068582536e-08	1215	81.6719	0.0553	0.0901614	0.53949	6	4.80552	-0.3397	0.236827	0.15146	6	-0.617829	2.06314	0.779504	6	-0.0831942	0.176621	0.657453	6	-0.111733	0.100752	0.267437	6	-0.0822093	0.125408	0.512125	6	-0.206563	0.202452	0.194478	6	-0.12	0.11214	0.284578	6	-0.102316	0.119014	0.389958	6	-0.111733	0.100752	0.317908
23119	1727	Arm fat percentage (right)	Ease of skin tanning	413107	6454	5e-05	3.47471154737988e-07	1833	106.617	0.0248	0.0787387	0.75248	32	6.06047	-0.260581	0.212492	0.22008	32	-0.953505	0.675722	0.168505	32	0.211734	0.154452	0.180258	32	0.0257753	0.0479434	0.59084	32	-0.00295902	0.0668861	0.964713	32	-1.03736e-15	0.279467	NA	32	0.025	0.0692922	0.718256	32	0.0324205	0.0501133	0.517668	32	0.0257753	0.047687	0.592708
23119	1747_5	Arm fat percentage (right)	Hair colour (natural	413107	6454	5e-07	1.30827793043409e-09	845	71.2789	-0.0458	0.0794902	0.56472	NA	NA	NA	NA	NA	NA	NA	NA	NA	NA	NA	NA	NA	NA	NA	NA	NA	NA	NA	NA	NA	NA	NA	NA	NA	NA	NA	NA	NA	NA	NA	NA	NA	NA	NA	NA	NA
23119	1747_5	Arm fat percentage (right)	Hair colour (natural	413107	6454	5e-06	2.08433068582536e-08	1215	82.869	-0.014	0.0654784	0.83048	6	4.23333	-0.0716069	0.281994	0.79955	6	0.246556	1.74271	0.894331	6	-0.0806192	0.166198	0.648125	6	-0.022234	0.0847212	0.792984	6	-0.0608313	0.112089	0.587331	6	-0.00474802	0.147611	0.988761	6	-0.02	0.0922305	0.828327	6	-0.0260377	0.0825882	0.752555	6	-0.022234	0.0847212	0.803454
23119	1747_5	Arm fat percentage (right)	Hair colour (natural	413107	6454	5e-05	3.47471154737988e-07	1833	106.566	-0.0214	0.0665452	0.74762	32	31.9788	-0.336111	0.31456	0.28529	32	-0.120497	0.572031	0.834586	32	-0.0922777	0.113803	0.423632	32	-0.0199158	0.0405864	0.623637	32	-0.0528681	0.0556383	0.342005	32	-0.0267583	0.20284	0.993077	32	-0.02	0.0457862	0.662247	32	-0.0187461	0.0405347	0.643743	32	-0.0199158	0.038621	0.609742
23120	1727	Arm fat mass (right)	Ease of skin tanning	413080	6454	5e-07	1.30855482005643e-09	942	72.2852	0.0731	0.0949658	0.44142	NA	NA	NA	NA	NA	NA	NA	NA	NA	NA	NA	NA	NA	NA	NA	NA	NA	NA	NA	NA	NA	NA	NA	NA	NA	NA	NA	NA	NA	NA	NA	NA	NA	NA	NA	NA	NA
23120	1727	Arm fat mass (right)	Ease of skin tanning	413080	6454	5e-06	2.08473973639656e-08	1353	95.4567	0.0801	0.0837847	0.33932	4	3.99941	-0.170329	0.214264	0.42664	4	-1.71391	2.50561	0.564578	4	-0.0971672	0.175006	0.617457	4	-0.0600829	0.11709	0.607857	4	-0.0812398	0.134764	0.54662	4	3.37403716077489e-16	0.10291	NA	4	-0.065	0.116497	0.576874	4	-0.0643955	0.0989512	0.515188	4	-0.0600829	0.0698024	0.452669
23120	1727	Arm fat mass (right)	Ease of skin tanning	413080	6454	5e-05	3.47533507527586e-07	2017	122.059	0.0654	0.074749	0.38181	27	26.994	-0.549491	0.408886	0.17899	27	0.0451704	0.698309	0.948939	27	-0.127062	0.141335	0.376899	27	-0.045375	0.0522371	0.385046	27	-0.0721014	0.0684009	0.291837	27	1.38777878078145e-16	0.278432	NA	27	-0.045	0.0563676	0.424679	27	-0.0528837	0.0573808	0.356723	27	-0.045375	0.0450521	0.323136
23120	1747_5	Arm fat mass (right)	Hair colour (natural	413080	6454	5e-07	1.30855482005643e-09	942	71.6097	-0.0111	0.0682147	0.87104	NA	NA	NA	NA	NA	NA	NA	NA	NA	NA	NA	NA	NA	NA	NA	NA	NA	NA	NA	NA	NA	NA	NA	NA	NA	NA	NA	NA	NA	NA	NA	NA	NA	NA	NA	NA	NA
23120	1747_5	Arm fat mass (right)	Hair colour (natural	413080	6454	5e-06	2.08473973639656e-08	1353	95.3237	-0.0269	0.0654469	0.68065	4	3.99941	0.0932533	0.174526	0.59312	4	0.0391513	2.47831	0.98883	4	-0.0546343	0.181072	0.782567	4	0.0604927	0.0991222	0.541673	4	0.0450866	0.118418	0.703395	4	0.0105541	0.13893	0.722799	4	0.065	0.102409	0.525616	4	0.0594458	0.0886029	0.502269	4	0.0604927	0.0945635	0.567865
23120	1747_5	Arm fat mass (right)	Hair colour (natural	413080	6454	5e-05	3.47533507527586e-07	2017	120.782	-0.0572	0.0675749	0.3975	27	2.7016	0.113372	0.321386	0.72427	27	0.284923	0.650662	0.665221	27	-0.190649	0.14112	0.188344	27	-0.0495028	0.0479806	0.302201	27	-0.0707048	0.0662124	0.285589	27	-0.023989	0.215472	0.771775	27	2.00936105613651e-17	0.0936611	1	27	-0.0528197	0.0516659	0.306624	27	-0.0495028	0.0479806	0.311703
23121	1727	Arm fat-free mass (right)	Ease of skin tanning	413074	6454	5e-07	1.30861632641199e-09	1264	159.692	-0.0114	0.055937	0.83852	NA	NA	NA	NA	NA	NA	NA	NA	NA	NA	NA	NA	NA	NA	NA	NA	NA	NA	NA	NA	NA	NA	NA	NA	NA	NA	NA	NA	NA	NA	NA	NA	NA	NA	NA	NA	NA
23121	1727	Arm fat-free mass (right)	Ease of skin tanning	413074	6454	5e-06	2.08483066366227e-08	1702	184.235	-0.0373	0.059762	0.53229	4	3.99957	-1.32971	0.803181	0.097813	4	-2.3009	6.90601	0.770688	4	-0.373803	0.208565	0.171	4	-0.264571	0.125156	0.0345205	4	-0.311538	0.145283	0.0320053	4	-5.75928e-16	0.209266	NA	4	-0.275	0.132431	0.0378428	4	-0.275395	0.148142	0.0630277	4	-0.264571	0.0922482	0.0641532
23121	1727	Arm fat-free mass (right)	Ease of skin tanning	413074	6454	5e-05	3.4754736533138e-07	2348	211.661	-0.0356	0.0524376	0.49686	39	38.9937	-4.56335	3.39245	0.17858	39	-1.53964	1.10734	0.172716	39	-0.217375	0.139115	0.126446	39	-0.0832594	0.0487048	0.087364	39	-0.0909617	0.0640474	0.155542	39	2.5882074261574e-15	0.365632	NA	39	-0.18	0.2384	0.450229	39	-0.0899348	0.0501464	0.072902	39	-0.0832594	0.0487048	0.0955197
23121	1747_5	Arm fat-free mass (right)	Hair colour (natural	413074	6454	5e-07	1.30861632641199e-09	1264	159.993	-0.0697	0.0561992	0.21511	NA	NA	NA	NA	NA	NA	NA	NA	NA	NA	NA	NA	NA	NA	NA	NA	NA	NA	NA	NA	NA	NA	NA	NA	NA	NA	NA	NA	NA	NA	NA	NA	NA	NA	NA	NA	NA
23121	1747_5	Arm fat-free mass (right)	Hair colour (natural	413074	6454	5e-06	2.08483066366227e-08	1702	183.974	-0.0622	0.0519629	0.23143	4	3.9995	-1.43978	2.41849	0.55163	4	-9.04251	6.23444	0.284015	4	-0.0974454	0.177581	0.621385	4	-0.0182062	0.132019	0.890314	4	-0.0802932	0.128796	0.533013	4	-0.00763993	0.179667	1	4	-0.14	0.189392	0.45978	4	-0.0408726	0.154302	0.791097	4	-0.0182062	0.132019	0.89905
23121	1747_5	Arm fat-free mass (right)	Hair colour (natural	413074	6454	5e-05	3.4754736533138e-07	2348	212.133	-0.0346	0.0471377	0.46255	39	38.4329	-1.02883	0.92431	0.26567	39	0.240721	0.853908	0.779588	39	-0.19653	0.117236	0.101876	39	-0.0530444	0.037201	0.153901	39	-0.0805983	0.0534941	0.131893	39	-0.0951695	0.175298	0.623993	39	-0.05	0.054251	0.356715	39	-0.0684899	0.0445984	0.124611	39	-0.0530444	0.0360589	0.149512
23122	1727	Arm predicted mass (right)	Ease of skin tanning	413067	6454	5e-07	1.30868804681938e-09	1301	158.903	-0.0605	0.0636736	0.34199	NA	NA	NA	NA	NA	NA	NA	NA	NA	NA	NA	NA	NA	NA	NA	NA	NA	NA	NA	NA	NA	NA	NA	NA	NA	NA	NA	NA	NA	NA	NA	NA	NA	NA	NA	NA	NA
23122	1727	Arm predicted mass (right)	Ease of skin tanning	413067	6454	5e-06	2.08493673437005e-08	1758	187.264	-0.0756	0.0578215	0.19121	5	4.99944	-0.858119	0.403184	0.033308	5	-4.58038	4.12914	0.348236	5	-0.386472	0.187734	0.108624	5	-0.243826	0.114426	0.0331013	5	-0.37297	0.143526	0.00935964	5	3.62123525610158e-15	0.200066	NA	5	-0.24	0.170099	0.15826	5	-0.355554	2.38821	0.881649	5	-0.243826	0.114426	0.100112
23122	1727	Arm predicted mass (right)	Ease of skin tanning	413067	6454	5e-05	3.47563533731332e-07	2407	225.289	-0.0508	0.0514361	0.32323	30	27.7854	-0.376789	0.201947	0.062072	30	-0.950398	0.894958	0.297334	30	-0.250061	0.146307	0.0981053	30	-0.0842621	0.0492302	0.0869717	30	-0.127642	0.0682737	0.0615448	30	7.97278909558941e-15	0.347933	NA	30	-0.08	0.11582	0.489739	30	-0.104038	0.059185	0.0787729	30	-0.0842621	0.0482358	0.0912429
23122	1747_5	Arm predicted mass (right)	Hair colour (natural	413067	6454	5e-07	1.30868804681938e-09	1301	159.077	-0.0469	0.0557643	0.40003	NA	NA	NA	NA	NA	NA	NA	NA	NA	NA	NA	NA	NA	NA	NA	NA	NA	NA	NA	NA	NA	NA	NA	NA	NA	NA	NA	NA	NA	NA	NA	NA	NA	NA	NA	NA	NA
23122	1747_5	Arm predicted mass (right)	Hair colour (natural	413067	6454	5e-06	2.08493673437005e-08	1758	187.078	-0.0363	0.0494285	0.46329	5	4.99945	-0.444109	0.398909	0.26558	5	-2.62408	3.38623	0.494858	5	-0.0807574	0.151731	0.622751	5	-0.104719	0.0926444	0.258337	5	-0.0812084	0.11554	0.482142	5	-0.0332192	0.117764	0.685714	5	-0.11	0.0914857	0.229219	5	-0.0718924	0.273717	0.792819	5	-0.104719	0.0388197	0.0542309
23122	1747_5	Arm predicted mass (right)	Hair colour (natural	413067	6454	5e-05	3.47563533731332e-07	2407	225.611	-0.0511	0.0460945	0.2675	30	29.9946	-0.134976	0.155238	0.38458	30	-0.899404	0.757625	0.245148	30	-0.0929786	0.113081	0.417657	30	-0.0275493	0.0416757	0.508588	30	-0.0628633	0.0592197	0.288451	30	-0.0430229	0.197348	0.995406	30	-0.025	0.059137	0.67248	30	-0.0375842	0.045069	0.404322	30	-0.0275493	0.0411267	0.508244
23123	1727	Arm fat percentage (left)	Ease of skin tanning	413046	6454	5e-07	1.30890343008616e-09	830	68.4433	0.0567	0.0951841	0.55104	NA	NA	NA	NA	NA	NA	NA	NA	NA	NA	NA	NA	NA	NA	NA	NA	NA	NA	NA	NA	NA	NA	NA	NA	NA	NA	NA	NA	NA	NA	NA	NA	NA	NA	NA	NA	NA
23123	1727	Arm fat percentage (left)	Ease of skin tanning	413046	6454	5e-06	2.08525496869783e-08	1208	76.7657	0.0456	0.0891188	0.60907	9	1.77262	-0.387369	0.416047	0.35182	9	-1.20858	1.57861	0.468937	9	-0.0693563	0.1679	0.690398	9	-0.0561988	0.0813354	0.489596	9	-0.0655345	0.110192	0.552025	9	1.52655665885959e-15	0.259834	NA	9	-0.065	0.0946203	0.492111	9	-0.0456751	0.0744069	0.53931	9	-0.0561988	0.0772412	0.487618
23123	1727	Arm fat percentage (left)	Ease of skin tanning	413046	6454	5e-05	3.47612044038215e-07	1844	102.268	0.0521	0.0826978	0.52885	32	11.9055	-0.265843	0.230049	0.24785	32	-0.70433	0.725287	0.339261	32	-0.0826249	0.153151	0.593395	32	0.000236789	0.0544626	0.996531	32	-0.0461108	0.0692607	0.505566	32	-7.9034e-15	0.354978	NA	32	2.00936105613651e-17	0.0638952	1	32	0.000207214	0.0551968	0.997005	32	0.000236789	0.0544626	0.996559
23123	1747_5	Arm fat percentage (left)	Hair colour (natural	413046	6454	5e-07	1.30890343008616e-09	830	68.299	-0.005	0.0499688	0.91974	NA	NA	NA	NA	NA	NA	NA	NA	NA	NA	NA	NA	NA	NA	NA	NA	NA	NA	NA	NA	NA	NA	NA	NA	NA	NA	NA	NA	NA	NA	NA	NA	NA	NA	NA	NA	NA
23123	1747_5	Arm fat percentage (left)	Hair colour (natural	413046	6454	5e-06	2.08525496869783e-08	1208	77.1685	4e-04	0.00748449	0.95708	9	0.00369948	-0.000850987	0.822343	0.99917	9	1.47002	1.46994	0.350593	9	-0.0954805	0.147451	0.535419	9	-0.0896362	0.0763435	0.240348	9	-0.0736877	0.0967043	0.446066	9	-0.0829128	0.218731	0.696101	9	-0.09	0.229034	0.694353	9	-0.0917519	0.0751053	0.221842	9	-0.0896362	0.0763435	0.274114
23123	1747_5	Arm fat percentage (left)	Hair colour (natural	413046	6454	5e-05	3.47612044038215e-07	1844	100.419	-0.0115	0.055727	0.83714	32	21.4024	-0.00280579	0.172883	0.98705	32	-0.810312	0.573666	0.168089	32	0.00933177	0.116788	0.936827	32	0.0153364	0.0438594	0.726585	32	0.0216971	0.0603264	0.7191	32	0.00651423	0.203447	0.990478	32	2.00936105613651e-17	0.0638511	1	32	0.0176859	0.0457498	0.699068	32	0.0153364	0.0438594	0.72895
23124	1727	Arm fat mass (left)	Ease of skin tanning	413007	6454	5e-07	1.30930333241963e-09	963	78.1435	0.0679	0.0913613	0.45755	NA	NA	NA	NA	NA	NA	NA	NA	NA	NA	NA	NA	NA	NA	NA	NA	NA	NA	NA	NA	NA	NA	NA	NA	NA	NA	NA	NA	NA	NA	NA	NA	NA	NA	NA	NA	NA
23124	1727	Arm fat mass (left)	Ease of skin tanning	413007	6454	5e-06	2.08584616245844e-08	1387	95.8473	0.0835	0.089483	0.35101	4	3.99953	-0.163641	0.220248	0.45749	4	0.822752	2.93037	0.805268	4	-0.0959208	0.174442	0.620698	4	-0.0552337	0.117506	0.638319	4	-0.0781181	0.143306	0.585675	4	5.65519853168439e-16	0.108282	NA	4	-0.055	0.116516	0.6369	4	-0.059226	0.0999861	0.553622	4	-0.0552337	0.0714286	0.495702
23124	1727	Arm fat mass (left)	Ease of skin tanning	413007	6454	5e-05	3.47702155290008e-07	2094	120.414	0.0768	0.0792284	0.33263	26	25.9964	-0.507965	0.212032	0.016589	26	0.786806	0.738189	0.297093	26	-0.114032	0.140617	0.425054	26	-0.100261	0.0529698	0.0583853	26	-0.0925539	0.0748314	0.21615	26	5.96050986345631e-15	0.305333	0.158655	26	-0.105	0.0609547	0.0849625	26	-0.108598	0.0573897	0.0584522	26	-0.100261	0.0505106	0.0582262
23124	1747_5	Arm fat mass (left)	Hair colour (natural	413007	6454	5e-07	1.30930333241963e-09	963	77.6439	-0.0075	0.0614958	0.9029	NA	NA	NA	NA	NA	NA	NA	NA	NA	NA	NA	NA	NA	NA	NA	NA	NA	NA	NA	NA	NA	NA	NA	NA	NA	NA	NA	NA	NA	NA	NA	NA	NA	NA	NA	NA	NA
23124	1747_5	Arm fat mass (left)	Hair colour (natural	413007	6454	5e-06	2.08584616245844e-08	1387	95.5913	-0.0181	0.065134	0.78131	4	2.57529	0.203909	0.243608	0.40257	4	3.46579	2.4807	0.297211	4	-0.0348601	0.177272	0.856672	4	0.0662123	0.0994745	0.505654	4	0.0618155	0.117634	0.599243	4	0.0197092	0.136328	0.827115	4	0.07	0.102524	0.494752	4	0.065506	0.0866651	0.449738	4	0.0662123	0.0936646	0.530585
23124	1747_5	Arm fat mass (left)	Hair colour (natural	413007	6454	5e-05	3.47702155290008e-07	2094	116.555	-0.0483	0.0701891	0.49152	26	2.1667	0.188912	0.28048	0.50061	26	0.575149	0.681043	0.406723	26	-0.219953	0.151105	0.157939	26	-0.075036	0.0487873	0.124042	26	-0.0826511	0.0667639	0.215731	26	-0.0772147	0.269028	0.482333	26	2.00936105613651e-17	0.119976	1	26	-0.0796544	0.0539685	0.139959	26	-0.075036	0.0487873	0.136604
23125	1727	Arm fat-free mass (left)	Ease of skin tanning	412998	6453	5e-07	1.30873933912312e-09	1267	163.661	-0.0003	0.00433647	0.93974	NA	NA	NA	NA	NA	NA	NA	NA	NA	NA	NA	NA	NA	NA	NA	NA	NA	NA	NA	NA	NA	NA	NA	NA	NA	NA	NA	NA	NA	NA	NA	NA	NA	NA	NA	NA	NA
23125	1727	Arm fat-free mass (left)	Ease of skin tanning	412998	6453	5e-06	2.08501247378479e-08	1694	185.083	0.0145	0.0519968	0.78016	4	3.99946	-1.89232	1.38267	0.17112	4	-9.01583	6.86874	0.319718	4	-0.333307	0.306528	0.356432	4	-0.131284	0.160575	0.413592	4	-0.172404	0.153815	0.26235	4	-0.0167535	0.204368	0.321978	4	2.00936105613651e-17	1.06486	1	4	-0.134392	0.148806	0.366452	4	-0.131284	0.160575	0.473484
23125	1727	Arm fat-free mass (left)	Ease of skin tanning	412998	6453	5e-05	3.47575080938967e-07	2368	229.135	0.0021	0.0161499	0.89497	33	11.614	-0.477097	0.58188	0.41226	33	-0.989307	1.12597	0.386365	33	-0.0213745	0.125538	0.865876	33	-0.00187166	0.0476272	0.968653	33	-0.0191775	0.0658531	0.770886	33	-9.12465e-16	0.31242	NA	33	3.8290095172598e-17	0.0518605	1	33	0.000426472	0.0504226	0.993252	33	-0.00187166	0.0412533	0.964094
23125	1747_5	Arm fat-free mass (left)	Hair colour (natural	412998	6453	5e-07	1.30873933912312e-09	1267	163.112	-0.0357	0.0554367	0.51921	NA	NA	NA	NA	NA	NA	NA	NA	NA	NA	NA	NA	NA	NA	NA	NA	NA	NA	NA	NA	NA	NA	NA	NA	NA	NA	NA	NA	NA	NA	NA	NA	NA	NA	NA	NA	NA
23125	1747_5	Arm fat-free mass (left)	Hair colour (natural	412998	6453	5e-06	2.08501247378479e-08	1694	184.259	-0.0634	0.0512144	0.21607	4	0.000404611	-0.0891725	58.5778	0.99879	4	-3.07602	5.04443	0.604055	4	-0.0790211	0.179881	0.690164	4	0.0123105	0.106565	0.908032	4	-0.066449	0.125734	0.59716	4	0.00354528	0.139356	0.946795	4	0.02	0.110449	0.856305	4	-0.0727911	0.047622	0.126384	4	0.0123105	0.0869827	0.896422
23125	1747_5	Arm fat-free mass (left)	Hair colour (natural	412998	6453	5e-05	3.47575080938967e-07	2368	228.086	-0.075	0.0455457	0.099626	33	2.26714	-3.54987	5.34085	0.50627	33	1.21314	0.95319	0.21258	33	-0.0465064	0.113793	0.685489	33	-0.0537421	0.0406442	0.186082	33	-0.0482711	0.0562606	0.390897	33	-0.102544	0.322245	0.637165	33	-0.06	0.409198	0.883426	33	-0.055688	0.0431982	0.197354	33	-0.0537421	0.0406442	0.195456
23126	1727	Arm predicted mass (left)	Ease of skin tanning	412983	6453	5e-07	1.30889321603433e-09	1270	157.207	-0.0202	0.063561	0.75107	NA	NA	NA	NA	NA	NA	NA	NA	NA	NA	NA	NA	NA	NA	NA	NA	NA	NA	NA	NA	NA	NA	NA	NA	NA	NA	NA	NA	NA	NA	NA	NA	NA	NA	NA	NA	NA
23126	1727	Arm predicted mass (left)	Ease of skin tanning	412983	6453	5e-06	2.08523984746023e-08	1718	185.178	-0.0162	0.0508819	0.74971	5	4.99929	-1.92833	1.49336	0.19661	5	-15.8313	7.84475	0.136911	5	0.135822	0.250912	0.617033	5	-0.073612	0.13934	0.597297	5	-0.0217277	0.162831	0.893848	5	-0.011438	0.201504	0.687823	5	2.00936105613651e-17	0.315585	1	5	-0.07262	0.133039	0.585167	5	-0.073612	0.13934	0.625249
23126	1727	Arm predicted mass (left)	Ease of skin tanning	412983	6453	5e-05	3.47609736994769e-07	2388	220.142	-0.0236	0.0514263	0.64667	32	31.9944	-0.276199	0.443495	0.53343	32	-0.979196	1.01573	0.342735	32	0.0955878	0.137025	0.490631	32	0.00508487	0.0503116	0.919497	32	0.0103168	0.0700526	0.882917	32	-3.92048e-16	0.361503	NA	32	0	0.0328338	1	32	0.00111778	0.0503782	0.982298	32	0.00508487	0.0503116	0.920148
23126	1747_5	Arm predicted mass (left)	Hair colour (natural	412983	6453	5e-07	1.30889321603433e-09	1270	157.08	-0.0426	0.0550981	0.43977	NA	NA	NA	NA	NA	NA	NA	NA	NA	NA	NA	NA	NA	NA	NA	NA	NA	NA	NA	NA	NA	NA	NA	NA	NA	NA	NA	NA	NA	NA	NA	NA	NA	NA	NA	NA	NA
23126	1747_5	Arm predicted mass (left)	Hair colour (natural	412983	6453	5e-06	2.08523984746023e-08	1718	185.086	-0.0599	0.0523587	0.2524	5	0.000507196	-0.280882	69.7638	0.99679	5	-9.13758	7.09296	0.288021	5	-0.0741334	0.157587	0.662553	5	-0.00447639	0.109506	0.967393	5	-0.0817771	0.123661	0.508418	5	0.0026566	0.216721	0.997454	5	-0.04	0.190041	0.833292	5	-0.105812	0.0249624	2.24652912710617e-05	5	-0.00447639	0.109506	0.969352
23126	1747_5	Arm predicted mass (left)	Hair colour (natural	412983	6453	5e-05	3.47609736994769e-07	2388	219.857	-0.063	0.0476904	0.18635	32	31.9859	-0.214672	0.275868	0.43647	32	0.807047	0.820091	0.33294	32	-0.0377581	0.117514	0.750134	32	-0.0585669	0.0406598	0.14975	32	-0.0519509	0.0589967	0.378549	32	-0.0442013	0.208177	0.794786	32	-0.06	0.0472526	0.204166	32	-0.0711197	0.043338	0.100788	32	-0.0585669	0.036079	0.114653
23129	1727	Trunk fat-free mass	Ease of skin tanning	412844	6451	5e-07	1.30900601469364e-09	1396	199.487	-0.06	0.0562259	0.28586	NA	NA	NA	NA	NA	NA	NA	NA	NA	NA	NA	NA	NA	NA	NA	NA	NA	NA	NA	NA	NA	NA	NA	NA	NA	NA	NA	NA	NA	NA	NA	NA	NA	NA	NA	NA	NA
23129	1727	Trunk fat-free mass	Ease of skin tanning	412844	6451	5e-06	2.08540669177637e-08	1819	234.753	-0.0525	0.0544423	0.33529	5	0.000522194	-0.905926	150.413	0.99519	5	6.93689	5.15118	0.270791	5	0.146775	0.194455	0.492373	5	0.0068372	0.112574	0.95157	5	0.0229664	0.149208	0.877671	5	-2.49627e-15	0.123631	NA	5	0.01	0.114291	0.930277	5	0.00747889	0.0889908	0.933024	5	0.0068372	0.0930566	0.944957
23129	1727	Trunk fat-free mass	Ease of skin tanning	412844	6451	5e-05	3.47635168429505e-07	2501	276.317	-0.0393	0.0500816	0.43204	42	41.9525	-4.8905	4.10925	0.234	42	0.449424	1.07032	0.676809	42	-0.277757	0.153789	0.07825	42	-0.0689732	0.0463408	0.136648	42	-0.0377052	0.0622592	0.544769	42	1.11022302462516e-14	0.351447	0.158655	42	2.00936105613651e-17	0.07482	1	42	-0.0707559	0.0488159	0.147213	42	-0.0689732	0.0463408	0.1443
23129	1747_5	Trunk fat-free mass	Hair colour (natural	412844	6451	5e-07	1.30900601469364e-09	1396	200.454	-0.0627	0.0492991	0.20313	NA	NA	NA	NA	NA	NA	NA	NA	NA	NA	NA	NA	NA	NA	NA	NA	NA	NA	NA	NA	NA	NA	NA	NA	NA	NA	NA	NA	NA	NA	NA	NA	NA	NA	NA	NA	NA
23129	1747_5	Trunk fat-free mass	Hair colour (natural	412844	6451	5e-06	2.08540669177637e-08	1819	235.062	-0.0576	0.0454585	0.2052	5	1.07875	1.22248	1.62769	0.45262	5	7.18032	4.36072	0.198197	5	-0.0534226	0.199081	0.801704	5	0.108076	0.109146	0.322078	5	-0.0184677	0.141872	0.89643	5	0.0669688	0.202249	0.332338	5	0.12	0.100923	0.234429	5	0.105067	0.108835	0.334354	5	0.108076	0.109146	0.378131
23129	1747_5	Trunk fat-free mass	Hair colour (natural	412844	6451	5e-05	3.47635168429505e-07	2501	275.589	-0.0602	0.0414382	0.14611	42	0.00460779	0.0297558	7.86611	0.99698	42	1.31211	0.821307	0.118006	42	-0.00888382	0.117492	0.940095	42	-0.0135801	0.0358958	0.705194	42	-0.00796847	0.0516509	0.877393	42	0.012875	0.177048	1	42	-0.015	0.039124	0.701426	42	-0.0168954	0.0356714	0.635756	42	-0.0135801	0.0315419	0.669058
23130	1727	Trunk predicted mass	Ease of skin tanning	412802	6451	5e-07	1.3094370032718e-09	1391	205.347	-0.048	0.0544245	0.37755	NA	NA	NA	NA	NA	NA	NA	NA	NA	NA	NA	NA	NA	NA	NA	NA	NA	NA	NA	NA	NA	NA	NA	NA	NA	NA	NA	NA	NA	NA	NA	NA	NA	NA	NA	NA	NA
23130	1727	Trunk predicted mass	Ease of skin tanning	412802	6451	5e-06	2.08604369333898e-08	1829	236.63	-0.054	0.0530967	0.30937	4	0.000409974	0.162233	76.685	0.99831	4	5.56914	5.54269	0.420817	4	0.179522	0.206537	0.448694	4	0.0658159	0.124734	0.597743	4	0.107139	0.142961	0.453602	4	-1.03563e-15	0.111164	0.841345	4	0.065	0.125016	0.603111	4	0.0691146	0.0923263	0.454104	4	0.0658159	0.0903585	0.519084
23130	1727	Trunk predicted mass	Ease of skin tanning	412802	6451	5e-05	3.47732264982525e-07	2484	281.538	-0.0359	0.0477756	0.45276	41	40.8867	-5.16577	5.34459	0.33377	41	0.114958	1.05088	0.913453	41	-0.0676857	0.148781	0.651616	41	-0.0564167	0.0463932	0.223963	41	-0.0340611	0.0620666	0.583155	41	5.5649929109336e-15	0.349262	0.841345	41	2.00936105613651e-17	0.0669915	1	41	-0.0564819	0.048311	0.242351	41	-0.0564167	0.0463932	0.231091
23130	1747_5	Trunk predicted mass	Hair colour (natural	412802	6451	5e-07	1.3094370032718e-09	1391	205.427	-0.055	0.047795	0.25026	NA	NA	NA	NA	NA	NA	NA	NA	NA	NA	NA	NA	NA	NA	NA	NA	NA	NA	NA	NA	NA	NA	NA	NA	NA	NA	NA	NA	NA	NA	NA	NA	NA	NA	NA	NA	NA
23130	1747_5	Trunk predicted mass	Hair colour (natural	412802	6451	5e-06	2.08604369333898e-08	1829	236.646	-0.0531	0.045128	0.23914	4	2.33797	1.9026	1.71762	0.26799	4	3.54275	5.5868	0.590853	4	0.00278802	0.218079	0.990602	4	0.170938	0.111617	0.125655	4	0.124428	0.126566	0.325557	4	0.0832904	0.203916	0.170807	4	0.18	0.112536	0.109712	4	0.170243	0.104016	0.101692	4	0.170938	0.111617	0.223166
23130	1747_5	Trunk predicted mass	Hair colour (natural	412802	6451	5e-05	3.47732264982525e-07	2484	280.182	-0.0514	0.0403843	0.20283	41	0.00453548	0.0315061	7.06737	0.99644	41	1.33919	0.81232	0.107263	41	-0.00964672	0.114852	0.933481	41	-0.0141144	0.0363058	0.697451	41	-0.0137794	0.050565	0.785231	41	0.013671	0.177258	1	41	-0.01	0.039657	0.800916	41	-0.0174741	0.0355187	0.622741	41	-0.0141144	0.0322733	0.664217
30100	1727	Mean platelet (thrombocyte) volume	Ease of skin tanning	407987	6281	5e-07	1.24724297556611e-09	1080	341.001	0.0565	0.0375655	0.13282	8	6.55351	0.0301454	0.0823851	0.71443	8	-0.542051	0.494972	0.315468	8	0.0143043	0.136335	0.919382	8	0.0592953	0.065894	0.368196	8	0.0427898	0.0848888	0.614213	8	-0.00726365	0.217845	0.999863	8	0.06	0.0697091	0.389392	8	0.0570989	0.0604851	0.345162	8	0.0592953	0.0632281	0.379568
30100	1727	Mean platelet (thrombocyte) volume	Ease of skin tanning	407987	6281	5e-06	1.9939615514275e-08	1384	355.821	0.0442	0.0370922	0.23389	15	7.81697	0.0478751	0.0792833	0.54594	15	-0.359405	0.318521	0.279562	15	0.0805849	0.125455	0.53103	15	0.095917	0.0536831	0.0739819	15	0.109663	0.0731517	0.133843	15	0.00749534	0.216776	0.992699	15	0.1	0.0561644	0.0749963	15	0.097104	0.0513767	0.0587525	15	0.095917	0.0445415	0.0492017
30100	1727	Mean platelet (thrombocyte) volume	Ease of skin tanning	407987	6281	5e-05	3.33669053276253e-07	1840	373.017	0.0595	0.0360008	0.098216	51	10.7155	0.0653807	0.075901	0.38902	51	-0.0744251	0.208057	0.722092	51	0.0503561	0.106086	0.637086	51	0.0960074	0.0348475	0.00586795	51	0.059062	0.0509783	0.246631	51	0.0461969	0.299642	0.800908	51	0.105	0.0394262	0.00774009	51	0.0945552	0.0351243	0.00710212	51	0.0960074	0.0337162	0.00637728
30100	1747_5	Mean platelet (thrombocyte) volume	Hair colour (natural	407987	6281	5e-07	1.24724297556611e-09	1080	341.738	-0.0433	0.0301334	0.15033	8	6.84053	0.0766418	0.0661068	0.24631	8	-0.103325	0.419018	0.813446	8	0.0944494	0.108957	0.414748	8	0.07133	0.0557825	0.200997	8	0.0769298	0.0726224	0.289457	8	0.0101747	0.109188	0.729875	8	0.07	0.0571869	0.220931	8	0.0767899	0.0615301	0.212029	8	0.07133	0.0422577	0.135272
30100	1747_5	Mean platelet (thrombocyte) volume	Hair colour (natural	407987	6281	5e-06	1.9939615514275e-08	1384	357.565	-0.0488	0.0296226	0.09966	15	7.93551	0.071925	0.0627885	0.252	15	0.173502	0.269643	0.53112	15	0.0479917	0.109448	0.667724	15	0.0428651	0.0454453	0.345566	15	0.0475888	0.0621213	0.44364	15	0.0211163	0.164867	0.755481	15	0.045	0.047063	0.338989	15	0.0440141	0.046903	0.348035	15	0.0428651	0.037847	0.276412
30100	1747_5	Mean platelet (thrombocyte) volume	Hair colour (natural	407987	6281	5e-05	3.33669053276253e-07	1840	374.312	-0.0314	0.0287443	0.27403	51	10.7842	0.0744049	0.0614526	0.22598	51	0.153711	0.181302	0.400662	51	0.0247176	0.0868119	0.77703	51	0.0300178	0.0302077	0.320362	51	0.0276342	0.042563	0.516174	51	0.103763	0.3165	0.467746	51	0.06	1.81996	0.9737	51	0.0323038	0.0298284	0.278814	51	0.0300178	0.0302077	0.325147
30300	1727	High light scatter reticulocyte count	Ease of skin tanning	401345	6108	5e-07	1.20107856993457e-09	717	156.94	-0.0776	0.0568695	0.17266	6	5.99855	0.000765628	0.0815682	0.99251	6	-0.566798	0.59189	0.392489	6	-0.0343617	0.116872	0.780564	6	0.00093989	0.0797235	0.990594	6	-0.038551	0.087684	0.660185	6	-0.0289755	0.213838	0.991697	6	-0.03	0.143812	0.834756	6	-0.048077	0.0791435	0.543541	6	0.00093989	0.0797235	0.99105
30300	1727	High light scatter reticulocyte count	Ease of skin tanning	401345	6108	5e-06	1.92539304499917e-08	1035	183.777	-0.0604	0.054329	0.2663	13	7.96535	0.0285344	0.0847665	0.7364	13	-0.466523	0.268771	0.110493	13	-0.0107632	0.108326	0.922494	13	0.0693544	0.0559476	0.215111	13	-0.00337665	0.0776207	0.965301	13	-0.00163399	0.213171	0.999982	13	0.075	0.0668545	0.261931	13	0.0651172	0.0621812	0.295	13	0.0693544	0.0559476	0.238807
30300	1727	High light scatter reticulocyte count	Ease of skin tanning	401345	6108	5e-05	3.23159866866263e-07	1500	199.6	-0.0295	0.0483239	0.54107	41	15.6667	0.0331296	0.0800475	0.67897	41	-0.0810166	0.21274	0.705401	41	-0.00924267	0.0973623	0.924844	41	0.0335008	0.0408538	0.412207	41	0.0140923	0.0568216	0.804127	41	-0.0354314	0.294768	0.997971	41	2.00936105613651e-17	0.0558159	1	41	0.0343235	0.0417646	0.411172	41	0.0335008	0.0408538	0.417067
30300	1747_5	High light scatter reticulocyte count	Hair colour (natural	401345	6108	5e-07	1.20107856993457e-09	717	156.737	-0.0697	0.0459354	0.12927	6	5.99862	-0.00686949	0.0631837	0.91342	6	-0.23711	0.431165	0.611631	6	-0.0663472	0.102099	0.544469	6	-0.0066206	0.0584426	0.909806	6	-0.00467672	0.0737591	0.949444	6	-0.000120188	0.0893702	0.99051	6	-0.005	0.0595591	0.933096	6	-0.0144334	0.0680149	0.831943	6	-0.0066206	0.0431724	0.884117
30300	1747_5	High light scatter reticulocyte count	Hair colour (natural	401345	6108	5e-06	1.92539304499917e-08	1035	183.077	-0.0788	0.0438109	0.072057	13	8.02646	-0.0144788	0.0625794	0.81703	13	0.097625	0.227527	0.676155	13	-0.0982671	0.0929588	0.311281	13	-0.035951	0.046744	0.441831	13	-0.0881127	0.0629731	0.16175	13	-0.00991856	0.161551	0.999376	13	-0.035	0.0518407	0.499584	13	-0.0630894	0.0835362	0.450108	13	-0.035951	0.0394115	0.379626
30300	1747_5	High light scatter reticulocyte count	Hair colour (natural	401345	6108	5e-05	3.23159866866263e-07	1500	199.4	-0.057	0.0400932	0.15509	41	15.3825	-0.0207677	0.0618257	0.73694	41	-0.0305961	0.18113	0.866734	41	-0.0627121	0.0745655	0.405329	41	-0.0206695	0.0346513	0.550841	41	-0.0221641	0.0450624	0.622822	41	-0.0229581	0.29827	0.966457	41	-0.01	0.139455	0.942834	41	-0.0207289	0.0325251	0.523917	41	-0.0206695	0.0346513	0.554202
30600	1727	Albumin	Ease of skin tanning	367192	5759	5e-07	1.32481425829667e-09	426	74.3757	-0.2002	0.0884397	0.023622	NA	NA	NA	NA	NA	NA	NA	NA	NA	NA	NA	NA	NA	NA	NA	NA	NA	NA	NA	NA	NA	NA	NA	NA	NA	NA	NA	NA	NA	NA	NA	NA	NA	NA	NA	NA	NA
30600	1727	Albumin	Ease of skin tanning	367192	5759	5e-06	2.10876016648598e-08	586	85.5985	-0.1928	0.081722	0.018302	NA	NA	NA	NA	NA	NA	NA	NA	NA	NA	NA	NA	NA	NA	NA	NA	NA	NA	NA	NA	NA	NA	NA	NA	NA	NA	NA	NA	NA	NA	NA	NA	NA	NA	NA	NA	NA
30600	1727	Albumin	Ease of skin tanning	367192	5759	5e-05	3.51193125025517e-07	943	89.6922	-0.1381	0.0782836	0.077806	30	17.6497	-0.457059	0.421977	0.27875	30	-0.602067	0.989955	0.547973	30	0.0768467	0.144561	0.599061	30	-0.0457963	0.0470839	0.330726	30	0.0190123	0.0676905	0.778809	30	4.23966417528732e-15	0.256252	NA	30	-0.05	0.0524463	0.34041	30	-0.0411809	0.0484545	0.395388	30	-0.0457963	0.0449366	0.316567
30600	1747_5	Albumin	Hair colour (natural	367192	5759	5e-07	1.32481425829667e-09	426	75.0449	0.0433	0.0764904	0.57102	NA	NA	NA	NA	NA	NA	NA	NA	NA	NA	NA	NA	NA	NA	NA	NA	NA	NA	NA	NA	NA	NA	NA	NA	NA	NA	NA	NA	NA	NA	NA	NA	NA	NA	NA	NA	NA
30600	1747_5	Albumin	Hair colour (natural	367192	5759	5e-06	2.10876016648598e-08	586	86.5822	0.0391	0.0707006	0.58051	NA	NA	NA	NA	NA	NA	NA	NA	NA	NA	NA	NA	NA	NA	NA	NA	NA	NA	NA	NA	NA	NA	NA	NA	NA	NA	NA	NA	NA	NA	NA	NA	NA	NA	NA	NA	NA
30600	1747_5	Albumin	Hair colour (natural	367192	5759	5e-05	3.51193125025517e-07	943	90.9145	0.0505	0.0699278	0.47043	30	1.48617	0.77987	0.946186	0.40981	30	0.414826	0.919565	0.655384	30	-0.0936329	0.122141	0.449518	30	0.0326278	0.043108	0.44912	30	-0.0230013	0.0562341	0.68252	30	0.0410396	0.312671	0.888461	30	-0.02	0.184315	0.913591	30	0.0176292	0.0490577	0.719328	30	0.0326278	0.043108	0.455225
30870	1727	Triglycerides	Ease of skin tanning	400639	6211	5e-07	1.27587385101435e-09	564	116.162	0.0287	0.0650106	0.65912	NA	NA	NA	NA	NA	NA	NA	NA	NA	NA	NA	NA	NA	NA	NA	NA	NA	NA	NA	NA	NA	NA	NA	NA	NA	NA	NA	NA	NA	NA	NA	NA	NA	NA	NA	NA	NA
30870	1727	Triglycerides	Ease of skin tanning	400639	6211	5e-06	2.03639254348076e-08	835	118.125	0.0168	0.0646941	0.79525	NA	NA	NA	NA	NA	NA	NA	NA	NA	NA	NA	NA	NA	NA	NA	NA	NA	NA	NA	NA	NA	NA	NA	NA	NA	NA	NA	NA	NA	NA	NA	NA	NA	NA	NA	NA	NA
30870	1727	Triglycerides	Ease of skin tanning	400639	6211	5e-05	3.40156264933e-07	1295	136.521	0.0114	0.0564537	0.84009	40	9.3093	-0.778375	0.419952	0.063813	40	-0.0936724	0.700552	0.894336	40	0.00451313	0.13002	0.972487	40	-0.0761721	0.0427507	0.0747859	40	-0.062363	0.0639077	0.329149	40	1.05367103930831e-14	0.306967	0.0759717	40	-0.08	0.107904	0.45845	40	-0.0737622	0.0458887	0.107963	40	-0.0761721	0.0427507	0.082574
30870	1747_5	Triglycerides	Hair colour (natural	400639	6211	5e-07	1.27587385101435e-09	564	117.29	0.0128	0.0527151	0.80804	NA	NA	NA	NA	NA	NA	NA	NA	NA	NA	NA	NA	NA	NA	NA	NA	NA	NA	NA	NA	NA	NA	NA	NA	NA	NA	NA	NA	NA	NA	NA	NA	NA	NA	NA	NA	NA
30870	1747_5	Triglycerides	Hair colour (natural	400639	6211	5e-06	2.03639254348076e-08	835	119.09	-0.0076	0.036217	0.83362	NA	NA	NA	NA	NA	NA	NA	NA	NA	NA	NA	NA	NA	NA	NA	NA	NA	NA	NA	NA	NA	NA	NA	NA	NA	NA	NA	NA	NA	NA	NA	NA	NA	NA	NA	NA	NA
30870	1747_5	Triglycerides	Hair colour (natural	400639	6211	5e-05	3.40156264933e-07	1295	137.111	0.0023	0.0251049	0.92745	40	2.04457	-0.274314	0.207364	0.18588	40	-0.779112	0.577291	0.18513	40	-0.159078	0.111405	0.161271	40	-0.0452485	0.035689	0.20485	40	-0.0667032	0.0515332	0.195537	40	-0.175187	0.169846	0.224664	40	-0.045	0.0393534	0.252838	40	-0.0496129	0.037288	0.183343	40	-0.0452485	0.0320369	0.165766
30890	1727	Vitamin D	Ease of skin tanning	383324	6046	5e-07	1.34911060101217e-09	127	24.0591	-0.0796	0.120072	0.5073	NA	NA	NA	NA	NA	NA	NA	NA	NA	NA	NA	NA	NA	NA	NA	NA	NA	NA	NA	NA	NA	NA	NA	NA	NA	NA	NA	NA	NA	NA	NA	NA	NA	NA	NA	NA	NA
30890	1727	Vitamin D	Ease of skin tanning	383324	6046	5e-06	2.1446124875979e-08	214	29.2398	-0.087	0.116895	0.45652	5	4.99946	-0.283762	0.141428	0.044813	5	0.695214	0.762037	0.428873	5	-0.0876975	0.164871	0.622955	5	-0.212202	0.0965816	0.0280114	5	-0.185466	0.124475	0.136228	5	-0.154878	0.151569	0.398282	5	-0.22	0.101228	0.0297575	5	-0.211069	0.0815798	0.00967381	5	-0.212202	0.0850546	0.0671321
30890	1727	Vitamin D	Ease of skin tanning	383324	6046	5e-05	3.56648565125184e-07	435	36.7474	-0.0682	0.105754	0.51875	30	10.7713	-0.284767	0.149197	0.056306	30	0.0191545	0.452451	0.966532	30	-0.0594131	0.131106	0.653799	30	-0.112973	0.0466421	0.0154299	30	-0.0662633	0.0640323	0.300743	30	-0.193438	0.163222	0.300015	30	-0.12	0.0540675	0.0264563	30	-0.110508	0.0474592	0.0198859	30	-0.112973	0.0465675	0.0217166
30890	1747_5	Vitamin D	Hair colour (natural	383324	6046	5e-07	1.34911060101217e-09	127	24.0889	0.0467	0.114183	0.68241	NA	NA	NA	NA	NA	NA	NA	NA	NA	NA	NA	NA	NA	NA	NA	NA	NA	NA	NA	NA	NA	NA	NA	NA	NA	NA	NA	NA	NA	NA	NA	NA	NA	NA	NA	NA	NA
30890	1747_5	Vitamin D	Hair colour (natural	383324	6046	5e-06	2.1446124875979e-08	214	29.4384	0.0623	0.110098	0.57166	5	1.99755	-0.337293	0.181608	0.063275	5	-1.12559	0.745623	0.228295	5	-0.277648	0.168565	0.174876	5	-0.149063	0.102907	0.147473	5	-0.168216	0.109907	0.125884	5	-0.214135	0.130912	0.13819	5	2.00936105613651e-17	0.398711	1	5	-0.150177	0.0974498	0.123299	5	-0.149063	0.102907	0.221051
30890	1747_5	Vitamin D	Hair colour (natural	383324	6046	5e-05	3.56648565125184e-07	435	36.8269	0.0308	0.0921477	0.73779	30	3.53529	-0.366362	0.186137	0.049041	30	-0.587725	0.450606	0.202752	30	-0.00933997	0.116205	0.936491	30	-0.061458	0.047433	0.195085	30	-0.0306583	0.0609727	0.615091	30	-0.192816	0.226245	0.459833	30	-0.11	0.188476	0.55947	30	-0.0642952	0.0501537	0.199856	30	-0.061458	0.047433	0.205304
[truncated: 21 more columns]

## Sheet: Table S6-nc AFR results 2-TEMR
Table S6	Results of negative control study in Africans by TEMR under three IV selection thresholds (5e-7, 5e-8, 5e-9)
column description:
exposure: phecode of the exposure
outcome: phecode of the outcome
exposure_name: description of the exposure
outcome_name: description of the outcome
Threshold: IV selection threshold
nIV: number of IVs used
beta: causal effect estimate by TEMR
beta.se: standard error of the causal effect estimate by TEMR
beta.pvalue: p-value of the causal effect estimate by TEMR
stat: statistics from the likelihood difference of the causal effect estimate returned by TEMR
exposure	outcome	exposure_name	outcome_name	Threshold	nIV	beta	beta.se	beta.pvalue	stat
30600	1727	Albumin	Ease of skin tanning	5e-07	422	-0.0468409	0.023967	0.0506554	-3.81963
30870	1727	Triglycerides	Ease of skin tanning	5e-07	564	0.046484	0.0223161	0.0372533	-4.33879
30890	1727	Vitamin D	Ease of skin tanning	5e-07	128	-0.0216575	0.0378462	0.567152	-0.32747
20015	1727	Sitting height	Ease of skin tanning	5e-07	1813	-0.0657431	0.0143502	4.61993e-06	-20.9887
21002	1727	Weight	Ease of skin tanning	5e-07	1236	-0.0138513	0.015568	0.373611	-0.791618
23098	1727	Weight	Ease of skin tanning	5e-07	1178	-0.00610661	0.0155754	0.695009	-0.153716
23099	1727	Body fat percentage	Ease of skin tanning	5e-07	858	0.0065706	0.0193147	0.733717	-0.115726
23100	1727	Whole body fat mass	Ease of skin tanning	5e-07	1053	0.0167701	0.0176473	0.341964	-0.903054
23101	1727	Whole body fat-free mass	Ease of skin tanning	5e-07	1447	-0.0523508	0.0146537	0.000353551	-12.763
23102	1727	Whole body water mass	Ease of skin tanning	5e-07	1409	-0.0417316	0.0151306	0.00581405	-7.60705
23105	1727	Basal metabolic rate	Ease of skin tanning	5e-07	1382	-0.0544117	0.0152641	0.000364303	-12.7069
23109	1727	Impedance of arm (right)	Ease of skin tanning	5e-07	1127	0.0235951	0.016251	0.146524	-2.10807
23110	1727	Impedance of arm (left)	Ease of skin tanning	5e-07	1040	0.0027971	0.0177277	0.874629	-0.0248951
23113	1727	Leg fat-free mass (right)	Ease of skin tanning	5e-07	1329	-0.065185	0.0159233	4.24584593383493e-05	-16.7582
23114	1727	Leg predicted mass (right)	Ease of skin tanning	5e-07	1334	-0.0684983	0.016058	1.99298e-05	-18.196
23117	1727	Leg fat-free mass (left)	Ease of skin tanning	5e-07	1364	-0.0496419	0.0158759	0.00176679	-9.77731
23118	1727	Leg predicted mass (left)	Ease of skin tanning	5e-07	1313	-0.0461816	0.0162448	0.00447105	-8.08186
23119	1727	Arm fat percentage (right)	Ease of skin tanning	5e-07	823	0.00260292	0.0183759	0.887357	-0.0200644
23120	1727	Arm fat mass (right)	Ease of skin tanning	5e-07	932	0.0110558	0.0161183	0.492763	-0.470487
23121	1727	Arm fat-free mass (right)	Ease of skin tanning	5e-07	1258	-0.0643971	0.0159438	5.3675968901309e-05	-16.3136
23122	1727	Arm predicted mass (right)	Ease of skin tanning	5e-07	1295	-0.0366663	0.0152115	0.015934	-5.81014
23123	1727	Arm fat percentage (left)	Ease of skin tanning	5e-07	832	0.0499866	0.0195031	0.010377	-6.56901
23124	1727	Arm fat mass (left)	Ease of skin tanning	5e-07	955	0.0157715	0.0194464	0.417351	-0.657763
23125	1727	Arm fat-free mass (left)	Ease of skin tanning	5e-07	1259	-0.0691399	0.0155252	8.45260002618158e-06	-19.8327
23126	1727	Arm predicted mass (left)	Ease of skin tanning	5e-07	1257	-0.0796086	0.015433	2.49136754059624e-07	-26.6086
23129	1727	Trunk fat-free mass	Ease of skin tanning	5e-07	1399	-0.0258811	0.0155349	0.0957127	-2.77557
23130	1727	Trunk predicted mass	Ease of skin tanning	5e-07	1386	-0.0231874	0.0155709	0.136448	-2.21756
30100	1727	Mean platelet (thrombocyte) volume	Ease of skin tanning	5e-07	1083	0.0527953	0.0156155	0.000722339	-11.4309
30300	1727	High light scatter reticulocyte count	Ease of skin tanning	5e-07	719	0.0975921	0.0185339	1.39731466059609e-07	-27.7266
3062	1727	Forced vital capacity (FVC)	Ease of skin tanning	5e-07	708	-0.0448271	0.0213437	0.0357067	-4.41106
3063	1727	Forced expiratory volume in 1-second (FEV1)	Ease of skin tanning	5e-07	616	-0.0562256	0.0219329	0.0103615	-6.57167
3064	1727	Peak expiratory flow (PEF)	Ease of skin tanning	5e-07	253	-0.0878212	0.0362138	0.0153051	-5.881
50	1727	Standing height	Ease of skin tanning	5e-07	2302	-0.0190048	0.0120764	0.115554	-2.47657
51	1727	Seated height	Ease of skin tanning	5e-07	1150	-0.027744	0.0178735	0.120605	-2.40944
23106	1727	Impedance of whole body	Ease of skin tanning	5e-07	1180	0.00316997	0.0166635	0.849125	-0.0361892
30600	1747_5	Albumin	Hair colour (natural	5e-07	424	0.0425668	0.0167273	0.0109358	-6.47572
30870	1747_5	Triglycerides	Hair colour (natural	5e-07	566	0.0105914	0.0159704	0.507208	-0.439823
30890	1747_5	Vitamin D	Hair colour (natural	5e-07	128	0.032488	0.0283979	0.252612	-1.3088
20015	1747_5	Sitting height	Hair colour (natural	5e-07	1814	-0.0169367	0.010178	0.0961032	-2.76905
21002	1747_5	Weight	Hair colour (natural	5e-07	1238	-0.03371	0.0111937	0.00259946	-9.06923
23098	1747_5	Weight	Hair colour (natural	5e-07	1181	-0.0402682	0.0111279	0.000296101	-13.0949
23099	1747_5	Body fat percentage	Hair colour (natural	5e-07	861	0.00709475	0.013996	0.612215	-0.256961
23100	1747_5	Whole body fat mass	Hair colour (natural	5e-07	1054	-0.0280142	0.0125946	0.0261275	-4.94756
23101	1747_5	Whole body fat-free mass	Hair colour (natural	5e-07	1449	-0.0303066	0.0103481	0.00340357	-8.57742
23102	1747_5	Whole body water mass	Hair colour (natural	5e-07	1413	-0.0152155	0.0106087	0.1515	-2.05709
23105	1747_5	Basal metabolic rate	Hair colour (natural	5e-07	1383	-0.0122601	0.0109863	0.264447	-1.24533
23106	1747_5	Impedance of whole body	Hair colour (natural	5e-07	1183	0.00780187	0.0118217	0.509278	-0.435551
23109	1747_5	Impedance of arm (right)	Hair colour (natural	5e-07	1128	-0.0207506	0.0117609	0.0776693	-3.11301
23110	1747_5	Impedance of arm (left)	Hair colour (natural	5e-07	1042	-0.0242709	0.0127473	0.0569092	-3.62525
23113	1747_5	Leg fat-free mass (right)	Hair colour (natural	5e-07	1333	-0.0220932	0.0112335	0.0492151	-3.868
23114	1747_5	Leg predicted mass (right)	Hair colour (natural	5e-07	1337	-0.0242288	0.0113279	0.0324475	-4.57469
23117	1747_5	Leg fat-free mass (left)	Hair colour (natural	5e-07	1366	-0.00343998	0.01134	0.761624	-0.0920205
23118	1747_5	Leg predicted mass (left)	Hair colour (natural	5e-07	1315	-0.00901177	0.0116488	0.439156	-0.598488
23119	1747_5	Arm fat percentage (right)	Hair colour (natural	5e-07	824	-0.0245551	0.0131466	0.0617908	-3.48865
23120	1747_5	Arm fat mass (right)	Hair colour (natural	5e-07	932	-0.0355941	0.0133747	0.00778416	-7.08247
23121	1747_5	Arm fat-free mass (right)	Hair colour (natural	5e-07	1258	-0.0221834	0.0113591	0.0508297	-3.81387
23122	1747_5	Arm predicted mass (right)	Hair colour (natural	5e-07	1296	-0.0269546	0.0109113	0.0134983	-6.1026
23123	1747_5	Arm fat percentage (left)	Hair colour (natural	5e-07	834	0.00734349	0.0139166	0.597724	-0.278443
23124	1747_5	Arm fat mass (left)	Hair colour (natural	5e-07	955	-0.0245296	0.0138694	0.0769583	-3.128
23125	1747_5	Arm fat-free mass (left)	Hair colour (natural	5e-07	1260	-0.0286984	0.0112134	0.0104886	-6.54997
23126	1747_5	Arm predicted mass (left)	Hair colour (natural	5e-07	1259	-0.0261003	0.0110966	0.0186676	-5.53238
23129	1747_5	Trunk fat-free mass	Hair colour (natural	5e-07	1401	-0.0349548	0.0108683	0.00129888	-10.3441
23130	1747_5	Trunk predicted mass	Hair colour (natural	5e-07	1389	-0.0366273	0.0109162	0.000792781	-11.2581
30100	1747_5	Mean platelet (thrombocyte) volume	Hair colour (natural	5e-07	1083	0.0174224	0.0110805	0.115871	-2.47227
30300	1747_5	High light scatter reticulocyte count	Hair colour (natural	5e-07	721	-0.00929415	0.0126932	0.464039	-0.536136
3062	1747_5	Forced vital capacity (FVC)	Hair colour (natural	5e-07	710	-0.000333775	0.0130285	0.979561	-0.000656324
3063	1747_5	Forced expiratory volume in 1-second (FEV1)	Hair colour (natural	5e-07	617	0.0254369	0.0155317	0.101477	-2.68218
3064	1747_5	Peak expiratory flow (PEF)	Hair colour (natural	5e-07	252	0.0480658	0.0263788	0.0684343	-3.32018
50	1747_5	Standing height	Hair colour (natural	5e-07	2303	-0.014378	0.00852496	0.091684	-2.84455
51	1747_5	Seated height	Hair colour (natural	5e-07	1150	0.00558306	0.0127332	0.661049	-0.192252
30600	1727	Albumin	Ease of skin tanning	5e-08	318	-0.0883553	0.0289321	0.00225901	-9.3262
30870	1727	Triglycerides	Ease of skin tanning	5e-08	429	0.0281805	0.0256487	0.271895	-1.20716
30890	1727	Vitamin D	Ease of skin tanning	5e-08	83	-0.00322973	0.0419269	0.938598	-0.005934
20015	1727	Sitting height	Ease of skin tanning	5e-08	1524	-0.0577751	0.0161059	0.000334239	-12.8681
21002	1727	Weight	Ease of skin tanning	5e-08	914	-0.0305121	0.0180361	0.0906977	-2.86195
23098	1727	Weight	Ease of skin tanning	5e-08	872	-0.0174446	0.018417	0.343538	-0.897184
23099	1727	Body fat percentage	Ease of skin tanning	5e-08	601	0.00683371	0.0230015	0.766392	-0.0882671
23100	1727	Whole body fat mass	Ease of skin tanning	5e-08	761	0.0039733	0.0203668	0.845325	-0.0380589
23101	1727	Whole body fat-free mass	Ease of skin tanning	5e-08	1129	-0.0493366	0.0171382	0.00399259	-8.28718
23102	1727	Whole body water mass	Ease of skin tanning	5e-08	1097	-0.0514467	0.0178326	0.00391449	-8.32306
23105	1727	Basal metabolic rate	Ease of skin tanning	5e-08	1089	-0.0492791	0.017824	0.0056965	-7.64389
23106	1727	Impedance of whole body	Ease of skin tanning	5e-08	913	-0.00726088	0.0200366	0.717067	-0.13132
23109	1727	Impedance of arm (right)	Ease of skin tanning	5e-08	837	0.00698168	0.0199056	0.725784	-0.123018
23110	1727	Impedance of arm (left)	Ease of skin tanning	5e-08	792	0.0107402	0.0210125	0.609258	-0.261257
23113	1727	Leg fat-free mass (right)	Ease of skin tanning	5e-08	1007	-6.1503e-05	0.0164642	0.997019	-1.39545e-05
23114	1727	Leg predicted mass (right)	Ease of skin tanning	5e-08	1036	0.00301907	0.0164055	0.853991	-0.0338664
23117	1727	Leg fat-free mass (left)	Ease of skin tanning	5e-08	1056	-0.0843653	0.0183989	4.53227387057543e-06	-21.0254
23118	1727	Leg predicted mass (left)	Ease of skin tanning	5e-08	997	-0.0852587	0.0186579	4.88700923020613e-06	-20.8811
23119	1727	Arm fat percentage (right)	Ease of skin tanning	5e-08	574	0.0413894	0.02385	0.0826695	-3.01162
23120	1727	Arm fat mass (right)	Ease of skin tanning	5e-08	656	0.0405569	0.0226891	0.0738559	-3.19517
23121	1727	Arm fat-free mass (right)	Ease of skin tanning	5e-08	949	-0.066223	0.0186708	0.00038982	-12.5804
23122	1727	Arm predicted mass (right)	Ease of skin tanning	5e-08	986	-0.0359144	0.0184237	0.0512525	-3.8
23123	1727	Arm fat percentage (left)	Ease of skin tanning	5e-08	588	0.0471703	0.0244289	0.0534933	-3.72844
23124	1727	Arm fat mass (left)	Ease of skin tanning	5e-08	683	0.0326095	0.0228747	0.153993	-2.03225
23125	1727	Arm fat-free mass (left)	Ease of skin tanning	5e-08	960	-0.0740565	0.0183456	5.41961900946703e-05	-16.2954
23126	1727	Arm predicted mass (left)	Ease of skin tanning	5e-08	950	-0.0708198	0.0181228	9.31507018707717e-05	-15.2707
23129	1727	Trunk fat-free mass	Ease of skin tanning	5e-08	1111	-0.00351473	0.0180817	0.845878	-0.037784
23130	1727	Trunk predicted mass	Ease of skin tanning	5e-08	1111	-0.00257647	0.0181242	0.886957	-0.0202083
30100	1727	Mean platelet (thrombocyte) volume	Ease of skin tanning	5e-08	918	0.0251301	0.0179411	0.161304	-1.96196
30300	1727	High light scatter reticulocyte count	Ease of skin tanning	5e-08	571	0.127524	0.0215937	3.51320371530782e-09	-34.8764
3062	1727	Forced vital capacity (FVC)	Ease of skin tanning	5e-08	527	-0.0506126	0.0265865	0.0569501	-3.62405
3063	1727	Forced expiratory volume in 1-second (FEV1)	Ease of skin tanning	5e-08	456	-0.0581131	0.0248827	0.0195183	-5.45447
3064	1727	Peak expiratory flow (PEF)	Ease of skin tanning	5e-08	170	-0.10801	0.0450625	0.0165348	-5.74509
50	1727	Standing height	Ease of skin tanning	5e-08	1966	-0.0225806	0.0132492	0.0883257	-2.90463
51	1727	Seated height	Ease of skin tanning	5e-08	954	-0.0239028	0.0199004	0.229703	-1.4427
30600	1747_5	Albumin	Hair colour (natural	5e-08	319	0.0482928	0.0200236	0.015874	-5.81678
30870	1747_5	Triglycerides	Hair colour (natural	5e-08	430	0.0112238	0.0185032	0.544123	-0.367951
30890	1747_5	Vitamin D	Hair colour (natural	5e-08	83	0.0208554	0.0315172	0.508155	-0.437865
20015	1747_5	Sitting height	Hair colour (natural	5e-08	1525	-0.00549468	0.0114717	0.631954	-0.22942
21002	1747_5	Weight	Hair colour (natural	5e-08	915	-0.0413391	0.01293	0.00138798	-10.2217
23098	1747_5	Weight	Hair colour (natural	5e-08	873	-0.0612144	0.0130822	2.87988503339337e-06	-21.895
23099	1747_5	Body fat percentage	Hair colour (natural	5e-08	603	-0.00367349	0.01653	0.824133	-0.0493872
23100	1747_5	Whole body fat mass	Hair colour (natural	5e-08	764	-0.0263993	0.0144048	0.0668519	-3.35867
23101	1747_5	Whole body fat-free mass	Hair colour (natural	5e-08	1130	-0.0159025	0.0119947	0.184907	-1.75774
23102	1747_5	Whole body water mass	Hair colour (natural	5e-08	1099	-0.0130658	0.0125053	0.296108	-1.09164
23105	1747_5	Basal metabolic rate	Hair colour (natural	5e-08	1091	0.00247794	0.0127592	0.846013	-0.0377168
23106	1747_5	Impedance of whole body	Hair colour (natural	5e-08	915	-0.00437519	0.0140921	0.756203	-0.0963919
23109	1747_5	Impedance of arm (right)	Hair colour (natural	5e-08	838	-0.0493097	0.0143311	0.000580119	-11.8387
23110	1747_5	Impedance of arm (left)	Hair colour (natural	5e-08	793	-0.0102288	0.014971	0.494454	-0.46682
23113	1747_5	Leg fat-free mass (right)	Hair colour (natural	5e-08	1010	-0.0141283	0.0134384	0.293105	-1.10531
23114	1747_5	Leg predicted mass (right)	Hair colour (natural	5e-08	1038	-0.0167428	0.0134195	0.212159	-1.55663
23117	1747_5	Leg fat-free mass (left)	Hair colour (natural	5e-08	1058	-0.00840524	0.0130802	0.520487	-0.412928
23118	1747_5	Leg predicted mass (left)	Hair colour (natural	5e-08	998	-0.0184495	0.0132898	0.165064	-1.92721
23119	1747_5	Arm fat percentage (right)	Hair colour (natural	5e-08	574	-0.0372691	0.0170075	0.028428	-4.80192
23120	1747_5	Arm fat mass (right)	Hair colour (natural	5e-08	656	-0.0242613	0.0160718	0.131156	-2.27877
23121	1747_5	Arm fat-free mass (right)	Hair colour (natural	5e-08	950	-0.0226724	0.0133625	0.0897489	-2.87887
23122	1747_5	Arm predicted mass (right)	Hair colour (natural	5e-08	988	-0.0191688	0.0131845	0.145977	-2.11379
23123	1747_5	Arm fat percentage (left)	Hair colour (natural	5e-08	589	-0.0290465	0.0175896	0.0986668	-2.72696
23124	1747_5	Arm fat mass (left)	Hair colour (natural	5e-08	684	-0.0333314	0.0162307	0.0400139	-4.21729
23125	1747_5	Arm fat-free mass (left)	Hair colour (natural	5e-08	962	-0.0203417	0.0131744	0.122581	-2.38403
23126	1747_5	Arm predicted mass (left)	Hair colour (natural	5e-08	953	-0.0408774	0.0130383	0.00171746	-9.82938
23129	1747_5	Trunk fat-free mass	Hair colour (natural	5e-08	1113	-0.0347452	0.0125813	0.0057508	-7.62678
23130	1747_5	Trunk predicted mass	Hair colour (natural	5e-08	1114	-0.0390971	0.012683	0.0020518	-9.5026
30100	1747_5	Mean platelet (thrombocyte) volume	Hair colour (natural	5e-08	918	-0.00436136	0.0126609	0.73049	-0.118662
30300	1747_5	High light scatter reticulocyte count	Hair colour (natural	5e-08	576	-0.0265724	0.0148222	0.0730136	-3.21394
3062	1747_5	Forced vital capacity (FVC)	Hair colour (natural	5e-08	529	0.000738054	0.0160142	0.963241	-0.00212405
3063	1747_5	Forced expiratory volume in 1-second (FEV1)	Hair colour (natural	5e-08	459	0.0138151	0.0177625	0.436705	-0.604925
3064	1747_5	Peak expiratory flow (PEF)	Hair colour (natural	5e-08	170	0.0589516	0.0320755	0.0660767	-3.37789
50	1747_5	Standing height	Hair colour (natural	5e-08	1967	-0.0296385	0.00940154	0.00161872	-9.93834
51	1747_5	Seated height	Hair colour (natural	5e-08	954	-0.0161046	0.0141538	0.25519	-1.29466
30600	1727	Albumin	Ease of skin tanning	5e-09	261	-0.105551	0.0330288	0.00139483	-10.2126
30870	1727	Triglycerides	Ease of skin tanning	5e-09	323	0.0611087	0.0313615	0.051352	-3.79676
30890	1727	Vitamin D	Ease of skin tanning	5e-09	65	-0.0422974	0.050164	0.399127	-0.710956
20015	1727	Sitting height	Ease of skin tanning	5e-09	1293	-0.0316647	0.0182857	0.0833339	-2.99865
21002	1727	Weight	Ease of skin tanning	5e-09	717	-0.0524332	0.0218772	0.0165434	-5.74418
23098	1727	Weight	Ease of skin tanning	5e-09	678	-0.0262494	0.0216061	0.224402	-1.476
23099	1727	Body fat percentage	Ease of skin tanning	5e-09	447	-0.0295024	0.0280574	0.293028	-1.10566
23100	1727	Whole body fat mass	Ease of skin tanning	5e-09	573	0.0166083	0.023417	0.478176	-0.50302
23101	1727	Whole body fat-free mass	Ease of skin tanning	5e-09	910	-0.0673798	0.0192802	0.000474466	-12.2134
23102	1727	Whole body water mass	Ease of skin tanning	5e-09	891	-0.0517307	0.0196834	0.00858546	-6.90709
23105	1727	Basal metabolic rate	Ease of skin tanning	5e-09	846	-0.0712389	0.0202463	0.000433801	-12.3807
23106	1727	Impedance of whole body	Ease of skin tanning	5e-09	696	0.0124911	0.023495	0.594969	-0.282651
23109	1727	Impedance of arm (right)	Ease of skin tanning	5e-09	654	0.0193639	0.0235795	0.411522	-0.6744
23110	1727	Impedance of arm (left)	Ease of skin tanning	5e-09	600	-0.00700955	0.024908	0.77839	-0.0791962
23113	1727	Leg fat-free mass (right)	Ease of skin tanning	5e-09	790	0.00020304	0.0183119	0.991153	-0.00012294
23114	1727	Leg predicted mass (right)	Ease of skin tanning	5e-09	813	0.00276448	0.0184037	0.880597	-0.0225639
23117	1727	Leg fat-free mass (left)	Ease of skin tanning	5e-09	823	-0.0786021	0.0204697	0.000123075	-14.745
23118	1727	Leg predicted mass (left)	Ease of skin tanning	5e-09	781	-0.0816544	0.0212248	0.00011951	-14.8004
23119	1727	Arm fat percentage (right)	Ease of skin tanning	5e-09	417	0.0840237	0.0291189	0.00390747	-8.32632
23120	1727	Arm fat mass (right)	Ease of skin tanning	5e-09	505	0.0410156	0.0281578	0.145218	-2.12178
23121	1727	Arm fat-free mass (right)	Ease of skin tanning	5e-09	770	-0.0522037	0.0217021	0.0161515	-5.7863
23122	1727	Arm predicted mass (right)	Ease of skin tanning	5e-09	791	-0.0520077	0.0212099	0.0142044	-6.01256
23123	1727	Arm fat percentage (left)	Ease of skin tanning	5e-09	424	0.0358909	0.02935	0.221383	-1.49538
23124	1727	Arm fat mass (left)	Ease of skin tanning	5e-09	525	0.0387135	0.0272794	0.155856	-2.01398
23125	1727	Arm fat-free mass (left)	Ease of skin tanning	5e-09	750	-0.0555028	0.0219175	0.0113301	-6.41279
23126	1727	Arm predicted mass (left)	Ease of skin tanning	5e-09	749	-0.0753673	0.0224746	0.000798134	-11.2456
23129	1727	Trunk fat-free mass	Ease of skin tanning	5e-09	905	-0.0063581	0.0203767	0.75502	-0.0973611
23130	1727	Trunk predicted mass	Ease of skin tanning	5e-09	896	-0.00862767	0.0204003	0.672354	-0.178861
30100	1727	Mean platelet (thrombocyte) volume	Ease of skin tanning	5e-09	824	0.0284563	0.0188592	0.13133	-2.27672
30300	1727	High light scatter reticulocyte count	Ease of skin tanning	5e-09	464	0.00137328	0.0276184	0.960343	-0.00247242
3062	1727	Forced vital capacity (FVC)	Ease of skin tanning	5e-09	414	-0.0164749	0.0314121	0.599946	-0.275077
3063	1727	Forced expiratory volume in 1-second (FEV1)	Ease of skin tanning	5e-09	343	-0.0841949	0.0319135	0.0083343	-6.96019
3064	1727	Peak expiratory flow (PEF)	Ease of skin tanning	5e-09	125	-0.140493	0.0527464	0.00773187	-7.09455
50	1727	Standing height	Ease of skin tanning	5e-09	1721	-0.00957885	0.0144912	0.508606	-0.436935
51	1727	Seated height	Ease of skin tanning	5e-09	810	-0.0220144	0.0223342	0.324291	-0.971563
30600	1747_5	Albumin	Hair colour (natural	5e-09	261	0.0886525	0.0232589	0.000138099	-14.5279
30870	1747_5	Triglycerides	Hair colour (natural	5e-09	323	-0.020493	0.0228155	0.369077	-0.806771
30890	1747_5	Vitamin D	Hair colour (natural	5e-09	65	-0.0105694	0.0330864	0.749385	-0.102048
20015	1747_5	Sitting height	Hair colour (natural	5e-09	1295	0.0010266	0.0132581	0.93828	-0.00599571
21002	1747_5	Weight	Hair colour (natural	5e-09	718	-0.0455506	0.0155427	0.00338237	-8.5888
23098	1747_5	Weight	Hair colour (natural	5e-09	679	-0.0394197	0.0153017	0.0099903	-6.63663
23099	1747_5	Body fat percentage	Hair colour (natural	5e-09	448	0.00896671	0.0201857	0.65689	-0.197324
23100	1747_5	Whole body fat mass	Hair colour (natural	5e-09	574	-0.0050022	0.016393	0.760257	-0.0931123
23101	1747_5	Whole body fat-free mass	Hair colour (natural	5e-09	910	-0.0255359	0.0136319	0.0610352	-3.50903
23102	1747_5	Whole body water mass	Hair colour (natural	5e-09	891	-0.00891824	0.0139677	0.523154	-0.407672
23105	1747_5	Basal metabolic rate	Hair colour (natural	5e-09	848	-0.0098006	0.0144822	0.498575	-0.457969
23106	1747_5	Impedance of whole body	Hair colour (natural	5e-09	699	-0.0383132	0.0165859	0.0208889	-5.33604
23109	1747_5	Impedance of arm (right)	Hair colour (natural	5e-09	655	-0.0571538	0.01704	0.000796258	-11.2499
23110	1747_5	Impedance of arm (left)	Hair colour (natural	5e-09	601	-0.0169995	0.0180035	0.345051	-0.891575
23113	1747_5	Leg fat-free mass (right)	Hair colour (natural	5e-09	791	-0.0126612	0.0148538	0.394001	-0.726557
23114	1747_5	Leg predicted mass (right)	Hair colour (natural	5e-09	813	-0.0216807	0.0150045	0.148474	-2.08786
23117	1747_5	Leg fat-free mass (left)	Hair colour (natural	5e-09	825	-0.00611296	0.0144972	0.67327	-0.177801
23118	1747_5	Leg predicted mass (left)	Hair colour (natural	5e-09	783	-0.0112809	0.0151404	0.45622	-0.555153
23119	1747_5	Arm fat percentage (right)	Hair colour (natural	5e-09	417	0.00486834	0.0206532	0.813651	-0.0555631
23120	1747_5	Arm fat mass (right)	Hair colour (natural	5e-09	506	-0.0175972	0.0197943	0.374002	-0.790325
23121	1747_5	Arm fat-free mass (right)	Hair colour (natural	5e-09	770	-0.00628131	0.0152292	0.680008	-0.170117
23122	1747_5	Arm predicted mass (right)	Hair colour (natural	5e-09	792	-0.0207545	0.0151958	0.172002	-1.86541
23123	1747_5	Arm fat percentage (left)	Hair colour (natural	5e-09	424	-0.0298676	0.021276	0.160374	-1.97069
23124	1747_5	Arm fat mass (left)	Hair colour (natural	5e-09	525	-0.0055237	0.0191257	0.772727	-0.0834112
23125	1747_5	Arm fat-free mass (left)	Hair colour (natural	5e-09	753	-0.00956932	0.015557	0.53848	-0.378364
23126	1747_5	Arm predicted mass (left)	Hair colour (natural	5e-09	752	-0.020864	0.0159708	0.191422	-1.70664
23129	1747_5	Trunk fat-free mass	Hair colour (natural	5e-09	906	-0.0453706	0.0141078	0.00129994	-10.3426
23130	1747_5	Trunk predicted mass	Hair colour (natural	5e-09	898	-0.0493857	0.0141593	0.000486902	-12.1652
30100	1747_5	Mean platelet (thrombocyte) volume	Hair colour (natural	5e-09	824	-0.0113098	0.0132224	0.392355	-0.73163
30300	1747_5	High light scatter reticulocyte count	Hair colour (natural	5e-09	468	-0.0601184	0.0194091	0.00195198	-9.59415
3062	1747_5	Forced vital capacity (FVC)	Hair colour (natural	5e-09	417	-0.000404306	0.0222132	0.985478	-0.000331283
3063	1747_5	Forced expiratory volume in 1-second (FEV1)	Hair colour (natural	5e-09	345	0.0127057	0.022963	0.58005	-0.306154
3064	1747_5	Peak expiratory flow (PEF)	Hair colour (natural	5e-09	125	0.02191	0.0329766	0.506427	-0.441442
50	1747_5	Standing height	Hair colour (natural	5e-09	1722	-0.0265654	0.0102724	0.00970709	-6.68787
51	1747_5	Seated height	Hair colour (natural	5e-09	810	-0.0150635	0.015789	0.340056	-0.910219

## Sheet: Table S7-nc AFR results 3
Table S7	Results of negative control study in Africans across three XMR variants (Omega=0, C=I, not correct selection bias) under the IV selection threshold 5e-5
column description:
exposure: phecode of the exposure
outcome: phecode of the outcome
exposure_name: description of the exposure
outcome_name: description of the outcome
exp_N1: sample size of the exposure trait in the auxiliary population
exp_N2: sample size of the exposure trait in the target population
method: specify the correponding XMR variant
nIV: number of IVs used
beta: causal effect estimate
beta.se: standard error of the causal effect estimate
beta.pvalue: p-value of the causal effect estimate
tau.sq: the (3,3) element in the estimated covariance of the causal inference mudule; variance of SNP's direct effect on outcome alpha_j
sigmax11: the (1,1) element in the estimated covariance of the causal inference mudule; variance of SNP's latent true effect on the auxiliary exposure gamma_1,j
sigmax12: the (1,2) element in the estimated covariance of the causal inference mudule; covariance of gamma_1,j and gamma_2,j
sigmax22: the (2,2) element in the estimated covariance of the causal inference mudule; variance of SNP's latent true effect on the target exposure gamma_2,j
IVsignal.sum: total IV strength
nvalid: number of valid IVs detected by the XMR variant
pi0: The probability of IVs to be valid
Threshold: IV selection threshold
Threshold_modified: modified threshold used in the fitting algorithm
exposure	outcome	exposure_name	outcome_name	exp_N1	exp_N2	method	nIV	beta	beta.se	beta.pvalue	tau.sq	sigmax11	sigmax12	sigmax22	IVsignal.sum	nvalid	pi0	Threshold	Threshold_modified
30600	1727	Albumin	Ease of skin tanning	367192	5759	XMR (Omega=0)	943	-0.0882	0.0673748	0.19044	1.77948e-05	6.80555e-05	7.5234e-05	0.000382208	0.0620844	124.047	0.131545	5e-05	3.51193e-07
30870	1727	Triglycerides	Ease of skin tanning	400639	6211	XMR (Omega=0)	1295	0.0206	0.0546552	0.70599	2.42359e-05	7.79058e-05	6.2063e-05	0.000494645	0.103504	186.361	0.143908	5e-05	3.40156e-07
30890	1727	Vitamin D	Ease of skin tanning	383324	6046	XMR (Omega=0)	435	-0.0533	0.10567	0.61399	2.2049e-05	0.000109246	0.000109134	0.000459215	0.0242407	42.534	0.0977794	5e-05	3.56649e-07
20015	1727	Sitting height	Ease of skin tanning	419233	6554	XMR (Omega=0)	2952	-0.0341	0.0344335	0.32151	1.89132e-05	6.81158e-05	4.73806e-05	0.000453549	0.295908	597.124	0.202278	5e-05	3.48097e-07
21002	1727	Weight	Ease of skin tanning	419316	6558	XMR (Omega=0)	2435	0.0404	0.0482273	0.4019	5.31771e-05	4.3626e-05	3.02585e-05	0.000503857	0.158052	292.658	0.120188	5e-05	3.48491e-07
23098	1727	Weight	Ease of skin tanning	413194	6458	XMR (Omega=0)	2331	0.0237	0.0468594	0.61352	5.91168e-05	4.09796e-05	3.72458e-05	0.000485653	0.159577	291.786	0.125176	5e-05	3.47861e-07
23099	1727	Body fat percentage	Ease of skin tanning	412960	6455	XMR (Omega=0)	1917	0.1024	0.0711971	0.15041	5.99561e-05	3.92942e-05	3.40544e-05	0.00043752	0.0858679	173.308	0.0904058	5e-05	3.47959e-07
23100	1727	Whole body fat mass	Ease of skin tanning	412524	6450	XMR (Omega=0)	2235	0.0857	0.0542689	0.1141	3.7636e-05	3.69721e-05	2.74211e-05	0.000484978	0.125707	239.616	0.107211	5e-05	3.48228e-07
23101	1727	Whole body fat-free mass	Ease of skin tanning	413158	6456	XMR (Omega=0)	2627	-0.0408	0.0434814	0.34863	3.10525e-05	5.43079e-05	4.57538e-05	0.000436027	0.18553	375.912	0.143096	5e-05	3.47649e-07
23102	1727	Whole body water mass	Ease of skin tanning	413190	6458	XMR (Omega=0)	2584	-0.0385	0.0436418	0.37706	3.24139e-05	5.5165e-05	4.54347e-05	0.000436032	0.183608	373.662	0.144606	5e-05	3.47871e-07
23105	1727	Basal metabolic rate	Ease of skin tanning	413178	6458	XMR (Omega=0)	2581	0.0051	0.0247531	0.83668	3.3019e-05	5.21446e-05	4.02991e-05	0.000451977	0.176228	352.69	0.136649	5e-05	3.47898e-07
23106	1727	Impedance of whole body	Ease of skin tanning	413153	6458	XMR (Omega=0)	2284	-0.0324	0.0472076	0.49253	2.67448e-05	3.50924e-05	3.60288e-05	0.000394862	0.143795	306.942	0.134388	5e-05	3.47956e-07
23109	1727	Impedance of arm (right)	Ease of skin tanning	413141	6458	XMR (Omega=0)	2244	0.0417	0.0534075	0.43532	2.7343e-05	4.40228e-05	3.76111e-05	0.000431671	0.125686	257.834	0.114899	5e-05	3.47984e-07
23110	1727	Impedance of arm (left)	Ease of skin tanning	413157	6458	XMR (Omega=0)	2050	0.0973	0.0557787	0.080964	3.41565e-05	4.03271e-05	3.18053e-05	0.000475676	0.115774	221.73	0.108161	5e-05	3.47947e-07
23113	1727	Leg fat-free mass (right)	Ease of skin tanning	413147	6458	XMR (Omega=0)	2450	-0.0057	0.029201	0.84481	3.21653e-05	4.70519e-05	4.15593e-05	0.000425316	0.169	348.095	0.142079	5e-05	3.4797e-07
23114	1727	Leg predicted mass (right)	Ease of skin tanning	413146	6458	XMR (Omega=0)	2490	0.0014	0.00880185	0.87375	2.97742e-05	4.76177e-05	4.56999e-05	0.000423606	0.169937	343.41	0.137916	5e-05	3.47972e-07
23117	1727	Leg fat-free mass (left)	Ease of skin tanning	413118	6455	XMR (Omega=0)	2543	-0.0192	0.0418034	0.64637	2.87544e-05	4.80029e-05	4.21282e-05	0.000430232	0.174736	356.635	0.140242	5e-05	3.47594e-07
23118	1727	Leg predicted mass (left)	Ease of skin tanning	413113	6455	XMR (Omega=0)	2463	0.0084	0.0319502	0.79286	2.56021e-05	4.60598e-05	4.02132e-05	0.000428317	0.170267	349.82	0.14203	5e-05	3.47605e-07
23119	1727	Arm fat percentage (right)	Ease of skin tanning	413107	6454	XMR (Omega=0)	1833	0.0764	0.0673727	0.25688	4.56257e-05	4.2731e-05	2.77726e-05	0.000439836	0.0790828	167.249	0.0912435	5e-05	3.47471e-07
23120	1727	Arm fat mass (right)	Ease of skin tanning	413080	6454	XMR (Omega=0)	2017	0.0472	0.0591245	0.42462	5.28192e-05	3.64278e-05	3.64703e-05	0.000475581	0.105452	192.428	0.095403	5e-05	3.47534e-07
23121	1727	Arm fat-free mass (right)	Ease of skin tanning	413074	6454	XMR (Omega=0)	2348	-0.0345	0.045907	0.45274	2.37467e-05	5.12445e-05	4.32704e-05	0.000417542	0.155849	328.449	0.139884	5e-05	3.47547e-07
23122	1727	Arm predicted mass (right)	Ease of skin tanning	413067	6454	XMR (Omega=0)	2407	-0.0315	0.0443873	0.47758	2.10222e-05	4.9358e-05	4.20044e-05	0.00040605	0.154608	333.912	0.138726	5e-05	3.47564e-07
23123	1727	Arm fat percentage (left)	Ease of skin tanning	413046	6454	XMR (Omega=0)	1844	0.0822	0.0671247	0.22047	3.91093e-05	3.98755e-05	3.32223e-05	0.000425295	0.0813087	170.063	0.0922248	5e-05	3.47612e-07
23124	1727	Arm fat mass (left)	Ease of skin tanning	413007	6454	XMR (Omega=0)	2094	0.0546	0.0614237	0.37392	5.57487e-05	3.53765e-05	3.21958e-05	0.000492718	0.107961	195.677	0.0934465	5e-05	3.47702e-07
23125	1727	Arm fat-free mass (left)	Ease of skin tanning	412998	6453	XMR (Omega=0)	2368	-0.0037	0.0206379	0.8596	2.84524e-05	4.88632e-05	3.98517e-05	0.000433342	0.157914	325.221	0.13734	5e-05	3.47575e-07
23126	1727	Arm predicted mass (left)	Ease of skin tanning	412983	6453	XMR (Omega=0)	2388	-0.0241	0.0448129	0.59124	4.00068e-05	5.02649e-05	4.1644e-05	0.00044109	0.159413	321.687	0.13471	5e-05	3.4761e-07
23129	1727	Trunk fat-free mass	Ease of skin tanning	412844	6451	XMR (Omega=0)	2501	-0.02	0.0429266	0.64152	5.03851e-05	5.08312e-05	4.00916e-05	0.000427439	0.188213	394.76	0.157841	5e-05	3.47635e-07
23130	1727	Trunk predicted mass	Ease of skin tanning	412802	6451	XMR (Omega=0)	2484	-0.0149	0.0394706	0.70632	4.49711e-05	5.22375e-05	4.38113e-05	0.000421977	0.186675	390.368	0.157153	5e-05	3.47732e-07
30100	1727	Mean platelet (thrombocyte) volume	Ease of skin tanning	407987	6281	XMR (Omega=0)	1840	0.0604	0.0342226	0.077533	2.43203e-05	9.45079e-05	7.58523e-05	0.000534199	0.266914	445.797	0.242281	5e-05	3.33669e-07
30300	1727	High light scatter reticulocyte count	Ease of skin tanning	401345	6108	XMR (Omega=0)	1500	-0.0342	0.0435062	0.43216	2.73298e-05	6.69491e-05	4.25586e-05	0.000549384	0.145235	247.965	0.16531	5e-05	3.2316e-07
3062	1727	Forced vital capacity (FVC)	Ease of skin tanning	383471	5978	XMR (Omega=0)	1551	-0.082	0.0643555	0.20243	4.72695e-05	4.17304e-05	4.13719e-05	0.000382817	0.0872644	189.178	0.121972	5e-05	3.45405e-07
3063	1727	Forced expiratory volume in 1-second (FEV1)	Ease of skin tanning	383471	5978	XMR (Omega=0)	1392	0.0062	0.0320072	0.84526	4.6622e-05	4.48447e-05	3.81593e-05	0.000392366	0.0680717	150.681	0.108248	5e-05	3.45405e-07
3064	1727	Peak expiratory flow (PEF)	Ease of skin tanning	383471	5978	XMR (Omega=0)	719	-0.3343	0.145378	0.021469	4.37193e-05	4.03429e-05	3.94952e-05	0.000243025	0.0176171	55.0699	0.0765923	5e-05	3.45405e-07
50	1727	Standing height	Ease of skin tanning	419596	6556	XMR (Omega=0)	3350	-0.0311	0.028612	0.27669	2.56487e-05	7.30448e-05	5.28536e-05	0.000477287	0.427398	817.071	0.243902	5e-05	3.47562e-07
51	1727	Seated height	Ease of skin tanning	419245	6554	XMR (Omega=0)	2070	-0.0799	0.0443057	0.071257	2.58421e-05	5.96397e-05	4.81704e-05	0.000411935	0.172448	369.713	0.178605	5e-05	3.48069e-07
30600	1747_5	Albumin	Hair colour (natural	367192	5759	XMR (Omega=0)	943	0.0611	0.0611116	0.3172	1.54596e-05	6.77316e-05	7.40812e-05	0.000383826	0.0625567	124.958	0.132511	5e-05	3.51193e-07
30870	1747_5	Triglycerides	Hair colour (natural	400639	6211	XMR (Omega=0)	1295	0.0018	0.016829	0.91354	2.75788e-05	7.80569e-05	6.22283e-05	0.000495105	0.103353	185.948	0.143589	5e-05	3.40156e-07
30890	1747_5	Vitamin D	Hair colour (natural	383324	6046	XMR (Omega=0)	435	0.0276	0.0827595	0.73861	4.50323e-05	0.000109325	0.000109277	0.000457691	0.024132	42.4736	0.0976405	5e-05	3.56649e-07
20015	1747_5	Sitting height	Hair colour (natural	419233	6554	XMR (Omega=0)	2952	0.0111	0.0267507	0.67793	2.63153e-05	6.81026e-05	4.74063e-05	0.000455055	0.296277	596.917	0.202208	5e-05	3.48097e-07
21002	1747_5	Weight	Hair colour (natural	419316	6558	XMR (Omega=0)	2435	-0.0138	0.0377567	0.71409	2.73349e-05	4.36835e-05	3.06058e-05	0.000505594	0.158464	292.145	0.119977	5e-05	3.48491e-07
23098	1747_5	Weight	Hair colour (natural	413194	6458	XMR (Omega=0)	2331	-0.0315	0.0391729	0.42187	2.22675e-05	4.12118e-05	3.76596e-05	0.000486727	0.159315	290.193	0.124493	5e-05	3.47861e-07
23099	1747_5	Body fat percentage	Hair colour (natural	412960	6455	XMR (Omega=0)	1917	-0.0596	0.0551003	0.27967	2.32498e-05	3.9346e-05	3.36452e-05	0.000442036	0.085928	173.082	0.0902879	5e-05	3.47959e-07
23100	1747_5	Whole body fat mass	Hair colour (natural	412524	6450	XMR (Omega=0)	2235	-0.0738	0.0493325	0.13481	5.05651e-05	3.68662e-05	2.70187e-05	0.000484999	0.126378	241.151	0.107898	5e-05	3.48228e-07
23101	1747_5	Whole body fat-free mass	Hair colour (natural	413158	6456	XMR (Omega=0)	2627	-0.0488	0.0357521	0.17225	1.84827e-05	5.43184e-05	4.55316e-05	0.000435938	0.185303	375.698	0.143014	5e-05	3.47649e-07
23102	1747_5	Whole body water mass	Hair colour (natural	413190	6458	XMR (Omega=0)	2584	-0.0192	0.0330963	0.56207	1.52292e-05	5.51644e-05	4.53781e-05	0.00043581	0.183424	373.463	0.144529	5e-05	3.47871e-07
23105	1747_5	Basal metabolic rate	Hair colour (natural	413178	6458	XMR (Omega=0)	2581	-0.0511	0.0376198	0.17406	2.08114e-05	5.2186e-05	4.03217e-05	0.000452015	0.176232	352.374	0.136526	5e-05	3.47898e-07
23106	1747_5	Impedance of whole body	Hair colour (natural	413153	6458	XMR (Omega=0)	2284	-0.0116	0.0341274	0.73386	1.63781e-05	3.50954e-05	3.59176e-05	0.0003961	0.14399	306.817	0.134333	5e-05	3.47956e-07
23109	1747_5	Impedance of arm (right)	Hair colour (natural	413141	6458	XMR (Omega=0)	2244	0.0224	0.0431139	0.60341	3.63289e-05	4.39439e-05	3.72643e-05	0.000431875	0.125496	258.038	0.11499	5e-05	3.47984e-07
23110	1747_5	Impedance of arm (left)	Hair colour (natural	413157	6458	XMR (Omega=0)	2050	0.0147	0.043024	0.73311	2.32818e-05	4.03186e-05	3.2041e-05	0.000475404	0.115767	221.826	0.108208	5e-05	3.47947e-07
23113	1747_5	Leg fat-free mass (right)	Hair colour (natural	413147	6458	XMR (Omega=0)	2450	-0.0035	0.0220736	0.87223	2.56797e-05	4.71583e-05	4.16615e-05	0.00042506	0.168462	347.097	0.141672	5e-05	3.4797e-07
23114	1747_5	Leg predicted mass (right)	Hair colour (natural	413146	6458	XMR (Omega=0)	2490	-0.001	0.00900313	0.90948	2.40897e-05	4.77316e-05	4.58524e-05	0.000423163	0.169405	342.491	0.137547	5e-05	3.47972e-07
23117	1747_5	Leg fat-free mass (left)	Hair colour (natural	413118	6455	XMR (Omega=0)	2543	-0.0424	0.0391742	0.27955	2.65046e-05	4.80085e-05	4.20787e-05	0.00042964	0.174532	356.495	0.140187	5e-05	3.47594e-07
23118	1747_5	Leg predicted mass (left)	Hair colour (natural	413113	6455	XMR (Omega=0)	2463	-0.0529	0.0397353	0.18324	2.73205e-05	4.60307e-05	4.00631e-05	0.000427799	0.17018	349.986	0.142097	5e-05	3.47605e-07
23119	1747_5	Arm fat percentage (right)	Hair colour (natural	413107	6454	XMR (Omega=0)	1833	-0.0348	0.0597815	0.56033	4.45013e-05	4.27977e-05	2.76693e-05	0.000439622	0.0788431	167.136	0.0911815	5e-05	3.47471e-07
23120	1747_5	Arm fat mass (right)	Hair colour (natural	413080	6454	XMR (Omega=0)	2017	-0.0757	0.0480932	0.11562	2.53457e-05	3.63468e-05	3.61317e-05	0.000479191	0.106166	192.992	0.0956829	5e-05	3.47534e-07
23121	1747_5	Arm fat-free mass (right)	Hair colour (natural	413074	6454	XMR (Omega=0)	2348	-0.0288	0.0389789	0.45971	1.26584e-05	5.11163e-05	4.32275e-05	0.000417038	0.156176	329.288	0.140242	5e-05	3.47547e-07
23122	1747_5	Arm predicted mass (right)	Hair colour (natural	413067	6454	XMR (Omega=0)	2407	-0.045	0.0389734	0.24871	1.73707e-05	4.93057e-05	4.17985e-05	0.000406296	0.154785	334.115	0.13881	5e-05	3.47564e-07
23123	1747_5	Arm fat percentage (left)	Hair colour (natural	413046	6454	XMR (Omega=0)	1844	-0.0502	0.0587578	0.3926	4.673e-05	3.98218e-05	3.29048e-05	0.000425362	0.0811631	170.396	0.0924054	5e-05	3.47612e-07
23124	1747_5	Arm fat mass (left)	Hair colour (natural	413007	6454	XMR (Omega=0)	2094	-0.0766	0.0480876	0.11096	3.66402e-05	3.54947e-05	3.23792e-05	0.000494179	0.107738	194.809	0.0930318	5e-05	3.47702e-07
23125	1747_5	Arm fat-free mass (left)	Hair colour (natural	412998	6453	XMR (Omega=0)	2368	-0.0823	0.0387284	0.033685	1.94097e-05	4.88527e-05	3.96563e-05	0.000435468	0.158417	324.986	0.137241	5e-05	3.47575e-07
23126	1747_5	Arm predicted mass (left)	Hair colour (natural	412983	6453	XMR (Omega=0)	2388	-0.0881	0.0383806	0.021736	2.10506e-05	5.02472e-05	4.11708e-05	0.000443155	0.159723	321.654	0.134696	5e-05	3.4761e-07
23129	1747_5	Trunk fat-free mass	Hair colour (natural	412844	6451	XMR (Omega=0)	2501	-0.0619	0.035908	0.084688	2.00354e-05	5.0973e-05	3.99958e-05	0.000429321	0.188047	393.251	0.157238	5e-05	3.47635e-07
23130	1747_5	Trunk predicted mass	Hair colour (natural	412802	6451	XMR (Omega=0)	2484	-0.0497	0.0360506	0.16825	2.17337e-05	5.24082e-05	4.37696e-05	0.000423395	0.186359	388.71	0.156485	5e-05	3.47732e-07
30100	1747_5	Mean platelet (thrombocyte) volume	Hair colour (natural	407987	6281	XMR (Omega=0)	1840	-0.0325	0.0279938	0.24611	9.17465e-06	9.42812e-05	7.55962e-05	0.000535294	0.267782	446.783	0.242817	5e-05	3.33669e-07
30300	1747_5	High light scatter reticulocyte count	Hair colour (natural	401345	6108	XMR (Omega=0)	1500	-0.053	0.0369321	0.15159	8.43571e-06	6.7009e-05	4.25113e-05	0.000547862	0.14478	247.773	0.165182	5e-05	3.2316e-07
3062	1747_5	Forced vital capacity (FVC)	Hair colour (natural	383471	5978	XMR (Omega=0)	1551	-0.0451	0.0515291	0.38175	2.10075e-05	4.18151e-05	4.20709e-05	0.000381042	0.0871711	188.752	0.121697	5e-05	3.45405e-07
3063	1747_5	Forced expiratory volume in 1-second (FEV1)	Hair colour (natural	383471	5978	XMR (Omega=0)	1392	-0.0029	0.0241543	0.90289	1.1406e-05	4.4907e-05	3.82108e-05	0.000392921	0.0680957	150.49	0.108111	5e-05	3.45405e-07
3064	1747_5	Peak expiratory flow (PEF)	Hair colour (natural	383471	5978	XMR (Omega=0)	719	0.0828	0.116557	0.47764	2.1969e-05	4.02415e-05	3.93444e-05	0.000248425	0.017922	55.2147	0.0767937	5e-05	3.45405e-07
50	1747_5	Standing height	Hair colour (natural	419596	6556	XMR (Omega=0)	3350	-0.0161	0.0232156	0.48935	1.91038e-05	7.31168e-05	5.29162e-05	0.000477445	0.426811	816.117	0.243617	5e-05	3.47562e-07
51	1747_5	Seated height	Hair colour (natural	419245	6554	XMR (Omega=0)	2070	0.0139	0.0350325	0.69173	2.02795e-05	5.95983e-05	4.82307e-05	0.000412633	0.172743	369.762	0.178629	5e-05	3.48069e-07
30600	1727	Albumin	Ease of skin tanning	367192	5759	XMR (C=I)	943	-0.121	0.0751858	0.10749	2.42067e-05	7.74387e-05	8.83525e-05	0.000391207	0.0531657	102.439	0.108631	5e-05	3.51193e-07
30870	1727	Triglycerides	Ease of skin tanning	400639	6211	XMR (C=I)	1295	0.0226	0.0585956	0.69995	3.22247e-05	8.66337e-05	7.3446e-05	0.000544631	0.0947534	154.553	0.119346	5e-05	3.40156e-07
30890	1727	Vitamin D	Ease of skin tanning	383324	6046	XMR (C=I)	435	-0.0642	0.105406	0.5426	1.96875e-05	0.000115915	0.000116534	0.0004575	0.0225779	39.5813	0.0909915	5e-05	3.56649e-07
20015	1727	Sitting height	Ease of skin tanning	419233	6554	XMR (C=I)	2952	-0.0916	0.0377961	0.015376	2.49447e-05	6.19502e-05	4.31851e-05	0.000532432	0.289952	510.579	0.17296	5e-05	3.48097e-07
21002	1727	Weight	Ease of skin tanning	419316	6558	XMR (C=I)	2435	0.0602	0.0579572	0.29905	6.32536e-05	4.20765e-05	3.23079e-05	0.000587663	0.134845	215.862	0.0886496	5e-05	3.48491e-07
23098	1727	Weight	Ease of skin tanning	413194	6458	XMR (C=I)	2331	0.0655	0.0580698	0.25961	6.8145e-05	3.9447e-05	3.95799e-05	0.00058249	0.134909	209.34	0.0898071	5e-05	3.47861e-07
23099	1727	Body fat percentage	Ease of skin tanning	412960	6455	XMR (C=I)	1917	0.1708	0.0885223	0.053678	0.000129525	3.93566e-05	5.45979e-05	0.000507673	0.0763028	120.591	0.0629059	5e-05	3.47959e-07
23100	1727	Whole body fat mass	Ease of skin tanning	412524	6450	XMR (C=I)	2235	0.1585	0.0686087	0.020862	6.65499e-05	3.31789e-05	3.19973e-05	0.000579796	0.107423	169.796	0.0759713	5e-05	3.48228e-07
23101	1727	Whole body fat-free mass	Ease of skin tanning	413158	6456	XMR (C=I)	2627	-0.0446	0.0453666	0.32594	3.32474e-05	5.02959e-05	4.36103e-05	0.000526174	0.176194	305.098	0.116139	5e-05	3.47649e-07
23102	1727	Whole body water mass	Ease of skin tanning	413190	6458	XMR (C=I)	2584	-0.0413	0.0461827	0.371	3.45764e-05	5.11717e-05	4.44527e-05	0.000519227	0.175714	307.525	0.119011	5e-05	3.47871e-07
23105	1727	Basal metabolic rate	Ease of skin tanning	413178	6458	XMR (C=I)	2581	-0.0036	0.0193918	0.85077	3.5354e-05	4.87621e-05	3.54062e-05	0.000547881	0.167577	287.055	0.111219	5e-05	3.47898e-07
23106	1727	Impedance of whole body	Ease of skin tanning	413153	6458	XMR (C=I)	2284	-0.0377	0.0493735	0.44548	3.13489e-05	2.59885e-05	4.67263e-05	0.000418848	0.150343	259.609	0.113664	5e-05	3.47956e-07
23109	1727	Impedance of arm (right)	Ease of skin tanning	413141	6458	XMR (C=I)	2244	0.0457	0.0586798	0.43624	3.26531e-05	3.8789e-05	3.94602e-05	0.000513123	0.120176	207.763	0.0925862	5e-05	3.47984e-07
23110	1727	Impedance of arm (left)	Ease of skin tanning	413157	6458	XMR (C=I)	2050	0.1021	0.0636865	0.10874	4.58944e-05	3.69086e-05	3.64553e-05	0.000566598	0.111288	177.139	0.0864093	5e-05	3.47947e-07
23113	1727	Leg fat-free mass (right)	Ease of skin tanning	413147	6458	XMR (C=I)	2450	-0.0017	0.0126786	0.89465	4.07421e-05	3.95244e-05	3.96245e-05	0.000511197	0.171576	299.375	0.122194	5e-05	3.4797e-07
23114	1727	Leg predicted mass (right)	Ease of skin tanning	413146	6458	XMR (C=I)	2490	0.0035	0.0188725	0.85296	3.78659e-05	3.99497e-05	4.41109e-05	0.00050594	0.173561	298.494	0.119877	5e-05	3.47972e-07
23117	1727	Leg fat-free mass (left)	Ease of skin tanning	413118	6455	XMR (C=I)	2543	-0.0131	0.0391717	0.73899	3.60132e-05	4.37497e-05	4.17197e-05	0.000515282	0.162424	282.92	0.111255	5e-05	3.47594e-07
23118	1727	Leg predicted mass (left)	Ease of skin tanning	413113	6455	XMR (C=I)	2463	0.0088	0.0367071	0.81032	3.38025e-05	4.20368e-05	3.9406e-05	0.00050948	0.156728	277.192	0.112543	5e-05	3.47605e-07
23119	1727	Arm fat percentage (right)	Ease of skin tanning	413107	6454	XMR (C=I)	1833	0.1124	0.0824747	0.17277	6.24896e-05	4.00338e-05	3.96567e-05	0.000552269	0.0743679	120.724	0.0658615	5e-05	3.47471e-07
23120	1727	Arm fat mass (right)	Ease of skin tanning	413080	6454	XMR (C=I)	2017	0.1279	0.072238	0.076618	7.09532e-05	3.24502e-05	4.27173e-05	0.000563094	0.0949355	143.045	0.0709197	5e-05	3.47534e-07
23121	1727	Arm fat-free mass (right)	Ease of skin tanning	413074	6454	XMR (C=I)	2348	-0.0429	0.0489351	0.38094	3.12882e-05	5.20179e-05	4.74247e-05	0.0005035	0.13904	247.152	0.105261	5e-05	3.47547e-07
23122	1727	Arm predicted mass (right)	Ease of skin tanning	413067	6454	XMR (C=I)	2407	-0.0534	0.0481515	0.26749	2.28592e-05	4.6816e-05	4.55299e-05	0.000486289	0.143747	261.317	0.108565	5e-05	3.47564e-07
23123	1727	Arm fat percentage (left)	Ease of skin tanning	413046	6454	XMR (C=I)	1844	0.1292	0.0800686	0.10662	5.72682e-05	3.67522e-05	3.96999e-05	0.000539321	0.0734859	119.884	0.0650129	5e-05	3.47612e-07
23124	1727	Arm fat mass (left)	Ease of skin tanning	413007	6454	XMR (C=I)	2094	0.1382	0.0750666	0.065533	7.52509e-05	3.17007e-05	3.67546e-05	0.000586215	0.0932307	140.53	0.0671108	5e-05	3.47702e-07
23125	1727	Arm fat-free mass (left)	Ease of skin tanning	412998	6453	XMR (C=I)	2368	-0.0026	0.0151667	0.86141	3.20396e-05	4.51177e-05	4.15717e-05	0.000535191	0.152578	257.951	0.108932	5e-05	3.47575e-07
23126	1727	Arm predicted mass (left)	Ease of skin tanning	412983	6453	XMR (C=I)	2388	-0.0309	0.050114	0.53738	4.38103e-05	4.88746e-05	4.39222e-05	0.000527789	0.146673	251.369	0.105263	5e-05	3.4761e-07
23129	1727	Trunk fat-free mass	Ease of skin tanning	412844	6451	XMR (C=I)	2501	-0.0564	0.0484984	0.24468	4.01059e-05	4.99636e-05	4.01946e-05	0.000528834	0.177816	309.997	0.123949	5e-05	3.47635e-07
23130	1727	Trunk predicted mass	Ease of skin tanning	412802	6451	XMR (C=I)	2484	-0.0536	0.0469753	0.25411	3.33073e-05	5.02952e-05	4.48068e-05	0.000521698	0.180162	312.561	0.12583	5e-05	3.47732e-07
30100	1727	Mean platelet (thrombocyte) volume	Ease of skin tanning	407987	6281	XMR (C=I)	1840	0.0848	0.0344343	0.013836	2.4792e-05	9.39906e-05	8.20873e-05	0.000603341	0.272129	403.736	0.219422	5e-05	3.33669e-07
30300	1727	High light scatter reticulocyte count	Ease of skin tanning	401345	6108	XMR (C=I)	1500	-0.0106	0.0380228	0.78108	3.38906e-05	6.91612e-05	4.35972e-05	0.000600937	0.137734	216.839	0.14456	5e-05	3.2316e-07
3062	1727	Forced vital capacity (FVC)	Ease of skin tanning	383471	5978	XMR (C=I)	1551	-0.1551	0.0789045	0.049374	5.28619e-05	4.19935e-05	4.99148e-05	0.000431772	0.0744949	140.314	0.0904666	5e-05	3.45405e-07
3063	1727	Forced expiratory volume in 1-second (FEV1)	Ease of skin tanning	383471	5978	XMR (C=I)	1392	-0.0582	0.0890274	0.51322	5.31244e-05	4.92029e-05	5.08739e-05	0.000421495	0.0539031	106.984	0.0768565	5e-05	3.45405e-07
3064	1727	Peak expiratory flow (PEF)	Ease of skin tanning	383471	5978	XMR (C=I)	719	-0.3888	0.181866	0.032527	3.79957e-05	4.81339e-05	4.83311e-05	0.000248818	0.0127381	38.6158	0.0537076	5e-05	3.45405e-07
50	1727	Standing height	Ease of skin tanning	419596	6556	XMR (C=I)	3350	-0.083	0.0294997	0.004898	2.9916e-05	5.45397e-05	4.53983e-05	0.000552116	0.467575	785.841	0.234579	5e-05	3.47562e-07
51	1727	Seated height	Ease of skin tanning	419245	6554	XMR (C=I)	2070	-0.1217	0.0479031	0.011091	2.14045e-05	5.90447e-05	4.86414e-05	0.000478281	0.160915	304.002	0.146861	5e-05	3.48069e-07
30600	1747_5	Albumin	Hair colour (natural	367192	5759	XMR (C=I)	943	0.0536	0.0674232	0.42681	1.78984e-05	7.67955e-05	8.6601e-05	0.000396232	0.0540083	103.547	0.109806	5e-05	3.51193e-07
30870	1747_5	Triglycerides	Hair colour (natural	400639	6211	XMR (C=I)	1295	-0.0005	0.00634557	0.93591	3.16281e-05	8.66357e-05	7.37417e-05	0.000543398	0.0946742	154.611	0.119391	5e-05	3.40156e-07
30890	1747_5	Vitamin D	Hair colour (natural	383324	6046	XMR (C=I)	435	0.0179	0.0765774	0.81474	3.41294e-05	0.000115556	0.000116461	0.000457394	0.0226514	39.6941	0.0912508	5e-05	3.56649e-07
20015	1747_5	Sitting height	Hair colour (natural	419233	6554	XMR (C=I)	2952	0.0022	0.0127327	0.85987	3.20812e-05	6.25799e-05	4.37179e-05	0.000531147	0.285089	503.401	0.170529	5e-05	3.48097e-07
21002	1747_5	Weight	Hair colour (natural	419316	6558	XMR (C=I)	2435	-0.0247	0.0472431	0.60097	4.56656e-05	4.18835e-05	3.23301e-05	0.000593915	0.136463	216.095	0.0887455	5e-05	3.48491e-07
23098	1747_5	Weight	Hair colour (natural	413194	6458	XMR (C=I)	2331	-0.0358	0.0482127	0.45797	3.75353e-05	3.96852e-05	3.97589e-05	0.000588117	0.135149	207.832	0.0891601	5e-05	3.47861e-07
23099	1747_5	Body fat percentage	Hair colour (natural	412960	6455	XMR (C=I)	1917	-0.0332	0.0634324	0.60042	4.20979e-05	3.72014e-05	5.22592e-05	0.000516783	0.0762264	119.782	0.0624843	5e-05	3.47959e-07
23100	1747_5	Whole body fat mass	Hair colour (natural	412524	6450	XMR (C=I)	2235	-0.0913	0.0611167	0.13537	6.76706e-05	3.35808e-05	3.04909e-05	0.000577416	0.106257	169.009	0.0756192	5e-05	3.48228e-07
23101	1747_5	Whole body fat-free mass	Hair colour (natural	413158	6456	XMR (C=I)	2627	-0.0569	0.0399398	0.15397	2.05129e-05	5.0375e-05	4.33426e-05	0.000527642	0.17648	304.806	0.116028	5e-05	3.47649e-07
23102	1747_5	Whole body water mass	Hair colour (natural	413190	6458	XMR (C=I)	2584	-0.0335	0.0378196	0.37554	1.97645e-05	5.13453e-05	4.42524e-05	0.000520843	0.175349	306.091	0.118456	5e-05	3.47871e-07
23105	1747_5	Basal metabolic rate	Hair colour (natural	413178	6458	XMR (C=I)	2581	-0.0649	0.0421507	0.12349	2.44406e-05	4.88844e-05	3.55001e-05	0.000549809	0.168115	286.761	0.111105	5e-05	3.47898e-07
23106	1747_5	Impedance of whole body	Hair colour (natural	413153	6458	XMR (C=I)	2284	-0.0074	0.0330238	0.82282	2.72126e-05	2.58067e-05	4.58877e-05	0.00042509	0.151513	260.688	0.114137	5e-05	3.47956e-07
23109	1747_5	Impedance of arm (right)	Hair colour (natural	413141	6458	XMR (C=I)	2244	0.0074	0.0314067	0.81253	5.39277e-05	3.83648e-05	3.85406e-05	0.000513062	0.120769	209.621	0.0934142	5e-05	3.47984e-07
23110	1747_5	Impedance of arm (left)	Hair colour (natural	413157	6458	XMR (C=I)	2050	-0.0132	0.0422938	0.75529	6.11738e-05	3.69919e-05	3.6075e-05	0.000568761	0.11045	175.801	0.0857567	5e-05	3.47947e-07
23113	1747_5	Leg fat-free mass (right)	Hair colour (natural	413147	6458	XMR (C=I)	2450	-0.0134	0.0375499	0.72086	3.42039e-05	3.96143e-05	3.98481e-05	0.000511414	0.171472	298.755	0.121941	5e-05	3.4797e-07
23114	1747_5	Leg predicted mass (right)	Hair colour (natural	413146	6458	XMR (C=I)	2490	-0.0125	0.0365332	0.73127	3.04631e-05	4.01284e-05	4.44001e-05	0.000505484	0.17286	297.216	0.119364	5e-05	3.47972e-07
23117	1747_5	Leg fat-free mass (left)	Hair colour (natural	413118	6455	XMR (C=I)	2543	-0.0689	0.0447663	0.12355	3.69991e-05	4.36846e-05	4.18892e-05	0.000516683	0.163697	283.955	0.111661	5e-05	3.47594e-07
23118	1747_5	Leg predicted mass (left)	Hair colour (natural	413113	6455	XMR (C=I)	2463	-0.0829	0.0462999	0.073237	3.95779e-05	4.19675e-05	3.94013e-05	0.000510992	0.157848	278.199	0.112951	5e-05	3.47605e-07
23119	1747_5	Arm fat percentage (right)	Hair colour (natural	413107	6454	XMR (C=I)	1833	-0.0286	0.0652231	0.66078	4.38767e-05	4.02658e-05	3.91015e-05	0.000556244	0.0733331	118.977	0.0649085	5e-05	3.47471e-07
23120	1747_5	Arm fat mass (right)	Hair colour (natural	413080	6454	XMR (C=I)	2017	-0.0873	0.0590581	0.13927	4.44942e-05	3.23516e-05	4.10578e-05	0.000574924	0.0948815	142.105	0.0704537	5e-05	3.47534e-07
23121	1747_5	Arm fat-free mass (right)	Hair colour (natural	413074	6454	XMR (C=I)	2348	-0.0476	0.0449418	0.28925	1.79505e-05	5.18086e-05	4.7307e-05	0.000504525	0.139966	248.172	0.105695	5e-05	3.47547e-07
23122	1747_5	Arm predicted mass (right)	Hair colour (natural	413067	6454	XMR (C=I)	2407	-0.0662	0.0435537	0.12869	2.41022e-05	4.6561e-05	4.44979e-05	0.000489889	0.144803	262.327	0.108985	5e-05	3.47564e-07
23123	1747_5	Arm fat percentage (left)	Hair colour (natural	413046	6454	XMR (C=I)	1844	-0.0243	0.0654989	0.71012	8.05436e-05	3.84264e-05	4.00273e-05	0.000527823	0.0697523	115.958	0.0628838	5e-05	3.47612e-07
23124	1747_5	Arm fat mass (left)	Hair colour (natural	413007	6454	XMR (C=I)	2094	-0.077	0.0646537	0.23354	7.86031e-05	3.339e-05	3.73269e-05	0.000579858	0.0896545	135.547	0.0647314	5e-05	3.47702e-07
23125	1747_5	Arm fat-free mass (left)	Hair colour (natural	412998	6453	XMR (C=I)	2368	-0.0887	0.042432	0.036476	2.28453e-05	4.50791e-05	4.15246e-05	0.000537027	0.153486	258.568	0.109193	5e-05	3.47575e-07
23126	1747_5	Arm predicted mass (left)	Hair colour (natural	412983	6453	XMR (C=I)	2388	-0.0816	0.0444742	0.066547	2.17833e-05	4.88353e-05	4.38672e-05	0.000528576	0.147808	252.679	0.105812	5e-05	3.4761e-07
23129	1747_5	Trunk fat-free mass	Hair colour (natural	412844	6451	XMR (C=I)	2501	-0.069	0.0394862	0.080413	2.40174e-05	5.00294e-05	3.96973e-05	0.000531932	0.177938	309.193	0.123628	5e-05	3.47635e-07
23130	1747_5	Trunk predicted mass	Hair colour (natural	412802	6451	XMR (C=I)	2484	-0.0589	0.0389266	0.13018	2.41261e-05	5.03619e-05	4.42043e-05	0.000524513	0.180265	311.899	0.125563	5e-05	3.47732e-07
30100	1747_5	Mean platelet (thrombocyte) volume	Hair colour (natural	407987	6281	XMR (C=I)	1840	-0.0316	0.0282182	0.26343	9.78652e-06	9.42305e-05	8.1837e-05	0.000603753	0.271307	402.68	0.218848	5e-05	3.33669e-07
30300	1747_5	High light scatter reticulocyte count	Hair colour (natural	401345	6108	XMR (C=I)	1500	-0.0622	0.0392301	0.11302	9.62059e-06	6.93219e-05	4.36934e-05	0.000600075	0.137243	216.38	0.144253	5e-05	3.2316e-07
3062	1747_5	Forced vital capacity (FVC)	Hair colour (natural	383471	5978	XMR (C=I)	1551	-0.0666	0.0646785	0.30325	2.99477e-05	4.24004e-05	5.12604e-05	0.000432435	0.0735124	137.116	0.088405	5e-05	3.45405e-07
3063	1747_5	Forced expiratory volume in 1-second (FEV1)	Hair colour (natural	383471	5978	XMR (C=I)	1392	0.0015	0.018395	0.93347	1.75709e-05	4.94324e-05	5.14848e-05	0.000420107	0.0535206	106.265	0.0763399	5e-05	3.45405e-07
3064	1747_5	Peak expiratory flow (PEF)	Hair colour (natural	383471	5978	XMR (C=I)	719	0.0109	0.192612	0.95492	3.83433e-05	5.01959e-05	4.82797e-05	0.000247994	0.0117179	36.5537	0.0508396	5e-05	3.45405e-07
50	1747_5	Standing height	Hair colour (natural	419596	6556	XMR (C=I)	3350	-0.0218	0.0240162	0.365	2.24523e-05	5.53604e-05	4.63771e-05	0.000551134	0.461437	775.64	0.231534	5e-05	3.47562e-07
51	1747_5	Seated height	Hair colour (natural	419245	6554	XMR (C=I)	2070	0.0073	0.030536	0.81111	2.47908e-05	5.93664e-05	4.89358e-05	0.000477592	0.159725	302.043	0.145915	5e-05	3.48069e-07
30600	1727	Albumin	Ease of skin tanning	367192	5759	XMR (not correct selection bias)	943	-0.0414	0.0378447	0.27348	7.87584e-06	6.79278e-05	4.45306e-05	0.000255514	0.240926	942.906	0.9999	5e-05	1
30870	1727	Triglycerides	Ease of skin tanning	400639	6211	XMR (not correct selection bias)	1295	0.0326	0.0344894	0.34409	7.46726e-06	6.54585e-05	3.18756e-05	0.000230981	0.2991	1294.87	0.9999	5e-05	1
30890	1727	Vitamin D	Ease of skin tanning	383324	6046	XMR (not correct selection bias)	435	-0.009	0.0566121	0.87348	1.30604e-05	6.49999e-05	3.52513e-05	0.000226268	0.0984172	434.956	0.9999	5e-05	1
20015	1727	Sitting height	Ease of skin tanning	419233	6554	XMR (not correct selection bias)	2952	-0.0671	0.0203162	0.00094935	7.98021e-06	6.40458e-05	2.85362e-05	0.00027625	0.815408	2951.7	0.999898	5e-05	1
21002	1727	Weight	Ease of skin tanning	419316	6558	XMR (not correct selection bias)	2435	0.0178	0.024096	0.45939	7.64587e-06	5.2912e-05	2.46119e-05	0.000238206	0.579987	2434.76	0.9999	5e-05	1
23098	1727	Weight	Ease of skin tanning	413194	6458	XMR (not correct selection bias)	2331	0.0233	0.0245968	0.34394	9.68813e-06	5.375e-05	2.69182e-05	0.000245525	0.572279	2330.77	0.9999	5e-05	1
23099	1727	Body fat percentage	Ease of skin tanning	412960	6455	XMR (not correct selection bias)	1917	0.0604	0.0287666	0.035618	1.20119e-05	5.0744e-05	2.15975e-05	0.000232287	0.445312	1916.81	0.9999	5e-05	1
23100	1727	Whole body fat mass	Ease of skin tanning	412524	6450	XMR (not correct selection bias)	2235	0.0725	0.0269628	0.0071567	1.22283e-05	5.14536e-05	2.2015e-05	0.000228214	0.510008	2234.78	0.9999	5e-05	1
23101	1727	Whole body fat-free mass	Ease of skin tanning	413158	6456	XMR (not correct selection bias)	2627	-0.0027	0.0151898	0.85644	8.67648e-06	5.72508e-05	3.38264e-05	0.000250434	0.657829	2626.74	0.999899	5e-05	1
23102	1727	Whole body water mass	Ease of skin tanning	413190	6458	XMR (not correct selection bias)	2584	-0.0042	0.0186032	0.8215	1.05384e-05	5.74225e-05	3.21273e-05	0.000249301	0.644135	2583.74	0.999899	5e-05	1
23105	1727	Basal metabolic rate	Ease of skin tanning	413178	6458	XMR (not correct selection bias)	2581	0.0188	0.0224804	0.40259	5.94351e-06	5.61547e-05	3.1441e-05	0.000252279	0.651056	2580.74	0.999899	5e-05	1
23106	1727	Impedance of whole body	Ease of skin tanning	413153	6458	XMR (not correct selection bias)	2284	-0.0268	0.0249468	0.28195	9.74411e-06	5.31455e-05	3.06485e-05	0.000243346	0.555741	2283.77	0.9999	5e-05	1
23109	1727	Impedance of arm (right)	Ease of skin tanning	413141	6458	XMR (not correct selection bias)	2244	0.0771	0.0253622	0.0023733	6.17556e-06	5.31348e-05	2.7718e-05	0.000238218	0.534507	2243.78	0.9999	5e-05	1
23110	1727	Impedance of arm (left)	Ease of skin tanning	413157	6458	XMR (not correct selection bias)	2050	0.0527	0.0265425	0.047019	1.33145e-05	5.26793e-05	2.74759e-05	0.000246534	0.505345	2049.79	0.9999	5e-05	1
23113	1727	Leg fat-free mass (right)	Ease of skin tanning	413147	6458	XMR (not correct selection bias)	2450	-0.0053	0.0202767	0.79268	1.67152e-05	5.56944e-05	3.35798e-05	0.00025093	0.614718	2449.75	0.9999	5e-05	1
23114	1727	Leg predicted mass (right)	Ease of skin tanning	413146	6458	XMR (not correct selection bias)	2490	-0.0076	0.0217747	0.72677	1.47293e-05	5.53555e-05	3.4489e-05	0.000250011	0.622464	2489.75	0.9999	5e-05	1
23117	1727	Leg fat-free mass (left)	Ease of skin tanning	413118	6455	XMR (not correct selection bias)	2543	-0.0002	0.00245576	0.92522	1.16519e-05	5.57902e-05	3.00199e-05	0.000241483	0.614031	2542.74	0.9999	5e-05	1
23118	1727	Leg predicted mass (left)	Ease of skin tanning	413113	6455	XMR (not correct selection bias)	2463	0.0022	0.0137607	0.87372	8.67103e-06	5.56727e-05	3.01835e-05	0.000242252	0.596607	2462.75	0.9999	5e-05	1
23119	1727	Arm fat percentage (right)	Ease of skin tanning	413107	6454	XMR (not correct selection bias)	1833	0.0619	0.0286233	0.030577	1.05339e-05	5.10893e-05	2.46542e-05	0.000239804	0.439584	1832.82	0.9999	5e-05	1
23120	1727	Arm fat mass (right)	Ease of skin tanning	413080	6454	XMR (not correct selection bias)	2017	0.0612	0.0283274	0.030734	1.44381e-05	5.07832e-05	2.2639e-05	0.000230872	0.465636	2016.8	0.9999	5e-05	1
23121	1727	Arm fat-free mass (right)	Ease of skin tanning	413074	6454	XMR (not correct selection bias)	2348	0.001	0.00841178	0.90596	7.17421e-06	5.67794e-05	3.58472e-05	0.00024682	0.579475	2347.76	0.9999	5e-05	1
23122	1727	Arm predicted mass (right)	Ease of skin tanning	413067	6454	XMR (not correct selection bias)	2407	0.0035	0.0180359	0.84732	1.02463e-05	5.62793e-05	3.25961e-05	0.000242078	0.582621	2406.76	0.9999	5e-05	1
23123	1727	Arm fat percentage (left)	Ease of skin tanning	413046	6454	XMR (not correct selection bias)	1844	0.0743	0.0285328	0.0092279	1.19526e-05	5.06984e-05	2.40215e-05	0.00024162	0.445508	1843.82	0.9999	5e-05	1
23124	1727	Arm fat mass (left)	Ease of skin tanning	413007	6454	XMR (not correct selection bias)	2094	0.0638	0.0280981	0.023121	1.75905e-05	5.0441e-05	1.8338e-05	0.000230636	0.482909	2093.79	0.9999	5e-05	1
23125	1727	Arm fat-free mass (left)	Ease of skin tanning	412998	6453	XMR (not correct selection bias)	2368	0.0248	0.0241834	0.30568	1.15482e-05	5.58003e-05	3.12601e-05	0.000250523	0.593169	2367.76	0.9999	5e-05	1
23126	1727	Arm predicted mass (left)	Ease of skin tanning	412983	6453	XMR (not correct selection bias)	2388	0.0081	0.0222271	0.71675	1.06836e-05	5.60949e-05	3.36621e-05	0.000250353	0.597776	2387.76	0.9999	5e-05	1
23129	1727	Trunk fat-free mass	Ease of skin tanning	412844	6451	XMR (not correct selection bias)	2501	-0.0065	0.0210436	0.75594	1.1667e-05	5.82522e-05	3.11946e-05	0.00024908	0.622897	2500.75	0.999899	5e-05	1
23130	1727	Trunk predicted mass	Ease of skin tanning	412802	6451	XMR (not correct selection bias)	2484	-0.0037	0.0180857	0.83727	1.27041e-05	5.82907e-05	3.30936e-05	0.000253003	0.628405	2483.75	0.999899	5e-05	1
30100	1727	Mean platelet (thrombocyte) volume	Ease of skin tanning	407987	6281	XMR (not correct selection bias)	1840	0.0645	0.0246936	0.0089946	6.7684e-06	8.10767e-05	4.69913e-05	0.000291945	0.537124	1839.82	0.9999	5e-05	1
30300	1727	High light scatter reticulocyte count	Ease of skin tanning	401345	6108	XMR (not correct selection bias)	1500	0.0342	0.0287373	0.23397	8.89645e-06	6.5389e-05	2.79415e-05	0.000276874	0.415291	1499.85	0.9999	5e-05	1
3062	1727	Forced vital capacity (FVC)	Ease of skin tanning	383471	5978	XMR (not correct selection bias)	1551	-0.0662	0.0312682	0.034334	1.98165e-05	5.72665e-05	2.58967e-05	0.000251762	0.390509	1550.84	0.9999	5e-05	1
3063	1727	Forced expiratory volume in 1-second (FEV1)	Ease of skin tanning	383471	5978	XMR (not correct selection bias)	1392	-0.1059	0.0341128	0.001909	8.71989e-06	5.70859e-05	1.77692e-05	0.000230724	0.321135	1391.86	0.9999	5e-05	1
3064	1727	Peak expiratory flow (PEF)	Ease of skin tanning	383471	5978	XMR (not correct selection bias)	719	-0.165	0.0530688	0.0018749	3.4604e-06	5.45516e-05	2.7198e-05	0.000185966	0.133696	718.928	0.9999	5e-05	1
50	1727	Standing height	Ease of skin tanning	419596	6556	XMR (not correct selection bias)	3350	-0.0604	0.0185037	0.0010873	1.45346e-05	6.82313e-05	3.84199e-05	0.000296779	0.994106	3349.65	0.999897	5e-05	1
51	1727	Seated height	Ease of skin tanning	419245	6554	XMR (not correct selection bias)	2070	-0.0399	0.025632	0.11998	5.66687e-06	6.18885e-05	3.05618e-05	0.00024939	0.516227	2069.79	0.9999	5e-05	1
30600	1747_5	Albumin	Hair colour (natural	367192	5759	XMR (not correct selection bias)	943	0.0591	0.0327035	0.070919	8.98143e-06	6.7932e-05	4.43705e-05	0.000255766	0.241163	942.906	0.9999	5e-05	1
30870	1747_5	Triglycerides	Hair colour (natural	400639	6211	XMR (not correct selection bias)	1295	-0.0017	0.0153636	0.91115	7.89689e-06	6.54575e-05	3.18574e-05	0.000231017	0.299138	1294.87	0.9999	5e-05	1
30890	1747_5	Vitamin D	Hair colour (natural	383324	6046	XMR (not correct selection bias)	435	-0.0036	0.040381	0.92837	1.05068e-05	6.50057e-05	3.55123e-05	0.000226117	0.0983551	434.956	0.9999	5e-05	1
20015	1747_5	Sitting height	Hair colour (natural	419233	6554	XMR (not correct selection bias)	2952	-0.0006	0.00498793	0.89684	7.34012e-06	6.4055e-05	2.85606e-05	0.00027618	0.815202	2951.7	0.999898	5e-05	1
21002	1747_5	Weight	Hair colour (natural	419316	6558	XMR (not correct selection bias)	2435	0.0086	0.0197772	0.66214	1.04639e-05	5.29166e-05	2.46384e-05	0.000238179	0.579893	2434.76	0.9999	5e-05	1
23098	1747_5	Weight	Hair colour (natural	413194	6458	XMR (not correct selection bias)	2331	0.0222	0.0205002	0.27826	5.74475e-06	5.37559e-05	2.69684e-05	0.000245469	0.572129	2330.77	0.9999	5e-05	1
23099	1747_5	Body fat percentage	Hair colour (natural	412960	6455	XMR (not correct selection bias)	1917	-0.0156	0.0232167	0.50139	4.14805e-06	5.07377e-05	2.15836e-05	0.000232354	0.445387	1916.81	0.9999	5e-05	1
23100	1747_5	Whole body fat mass	Hair colour (natural	412524	6450	XMR (not correct selection bias)	2235	0.0033	0.0169484	0.84678	9.74635e-06	5.14518e-05	2.19973e-05	0.000228145	0.509846	2234.78	0.9999	5e-05	1
23101	1747_5	Whole body fat-free mass	Hair colour (natural	413158	6456	XMR (not correct selection bias)	2627	0.0038	0.015228	0.80369	4.559e-06	5.72484e-05	3.3855e-05	0.000250416	0.657766	2626.74	0.999899	5e-05	1
23102	1747_5	Whole body water mass	Hair colour (natural	413190	6458	XMR (not correct selection bias)	2584	0.0155	0.0191559	0.41978	5.57687e-06	5.74195e-05	3.22119e-05	0.000249264	0.64402	2583.74	0.999899	5e-05	1
23105	1747_5	Basal metabolic rate	Hair colour (natural	413178	6458	XMR (not correct selection bias)	2581	-0.0029	0.0142659	0.83945	4.59911e-06	5.61574e-05	3.14097e-05	0.000252251	0.651006	2580.74	0.999899	5e-05	1
23106	1747_5	Impedance of whole body	Hair colour (natural	413153	6458	XMR (not correct selection bias)	2284	0.0001	0.00104201	0.94923	7.57325e-06	5.31434e-05	3.05453e-05	0.000243354	0.555766	2283.77	0.9999	5e-05	1
23109	1747_5	Impedance of arm (right)	Hair colour (natural	413141	6458	XMR (not correct selection bias)	2244	0.0038	0.0168805	0.82286	5.99699e-06	5.31442e-05	2.79193e-05	0.000238112	0.534273	2243.78	0.9999	5e-05	1
23110	1747_5	Impedance of arm (left)	Hair colour (natural	413157	6458	XMR (not correct selection bias)	2050	0.0151	0.0220799	0.4954	9.77843e-06	5.26884e-05	2.766e-05	0.000246432	0.505131	2049.79	0.9999	5e-05	1
23113	1747_5	Leg fat-free mass (right)	Hair colour (natural	413147	6458	XMR (not correct selection bias)	2450	-0.0239	0.0198977	0.23027	5.38135e-06	5.56912e-05	3.35786e-05	0.000250903	0.614667	2449.75	0.9999	5e-05	1
23114	1747_5	Leg predicted mass (right)	Hair colour (natural	413146	6458	XMR (not correct selection bias)	2490	-0.0253	0.0198844	0.20237	6.30069e-06	5.53482e-05	3.44779e-05	0.000249953	0.622337	2489.75	0.9999	5e-05	1
23117	1747_5	Leg fat-free mass (left)	Hair colour (natural	413118	6455	XMR (not correct selection bias)	2543	-0.0231	0.0203135	0.25567	9.16657e-06	5.57897e-05	3.00227e-05	0.000241432	0.613934	2542.74	0.9999	5e-05	1
23118	1747_5	Leg predicted mass (left)	Hair colour (natural	413113	6455	XMR (not correct selection bias)	2463	-0.0311	0.0206076	0.13122	7.57457e-06	5.56729e-05	3.01706e-05	0.000242243	0.596608	2462.75	0.9999	5e-05	1
23119	1747_5	Arm fat percentage (right)	Hair colour (natural	413107	6454	XMR (not correct selection bias)	1833	-0.0312	0.0236325	0.18609	4.55884e-06	5.10937e-05	2.45888e-05	0.000239968	0.439818	1832.82	0.9999	5e-05	1
23120	1747_5	Arm fat mass (right)	Hair colour (natural	413080	6454	XMR (not correct selection bias)	2017	-0.0103	0.0223753	0.64632	7.08867e-06	5.0783e-05	2.26002e-05	0.000230848	0.465581	2016.8	0.9999	5e-05	1
23121	1747_5	Arm fat-free mass (right)	Hair colour (natural	413074	6454	XMR (not correct selection bias)	2348	-0.0046	0.0173643	0.79092	5.89476e-06	5.67723e-05	3.58732e-05	0.000246791	0.579417	2347.76	0.9999	5e-05	1
23122	1747_5	Arm predicted mass (right)	Hair colour (natural	413067	6454	XMR (not correct selection bias)	2407	-0.016	0.0204652	0.43547	7.35591e-06	5.62688e-05	3.26106e-05	0.000242043	0.582559	2406.76	0.9999	5e-05	1
23123	1747_5	Arm fat percentage (left)	Hair colour (natural	413046	6454	XMR (not correct selection bias)	1844	-0.0012	0.0104212	0.91132	6.49244e-06	5.07062e-05	2.40238e-05	0.000241591	0.445452	1843.82	0.9999	5e-05	1
23124	1747_5	Arm fat mass (left)	Hair colour (natural	413007	6454	XMR (not correct selection bias)	2094	-0.0092	0.021992	0.6747	9.43556e-06	5.04429e-05	1.8288e-05	0.000230575	0.482789	2093.79	0.9999	5e-05	1
23125	1747_5	Arm fat-free mass (left)	Hair colour (natural	412998	6453	XMR (not correct selection bias)	2368	-0.0048	0.0172728	0.77981	3.80625e-06	5.58e-05	3.12193e-05	0.000250494	0.593117	2367.76	0.9999	5e-05	1
23126	1747_5	Arm predicted mass (left)	Hair colour (natural	412983	6453	XMR (not correct selection bias)	2388	0.0009	0.00754472	0.90269	3.71229e-06	5.60948e-05	3.36861e-05	0.000250319	0.597698	2387.76	0.9999	5e-05	1
23129	1747_5	Trunk fat-free mass	Hair colour (natural	412844	6451	XMR (not correct selection bias)	2501	-0.0083	0.0189535	0.65978	8.50473e-06	5.82513e-05	3.11776e-05	0.000249114	0.622981	2500.75	0.999899	5e-05	1
23130	1747_5	Trunk predicted mass	Hair colour (natural	412802	6451	XMR (not correct selection bias)	2484	-0.0053	0.0174433	0.76187	7.88858e-06	5.82841e-05	3.3097e-05	0.000253025	0.628457	2483.75	0.999899	5e-05	1
30100	1747_5	Mean platelet (thrombocyte) volume	Hair colour (natural	407987	6281	XMR (not correct selection bias)	1840	-0.0182	0.0205501	0.37564	4.05921e-06	8.10637e-05	4.69826e-05	0.00029196	0.537147	1839.82	0.999899	5e-05	1
30300	1747_5	High light scatter reticulocyte count	Hair colour (natural	401345	6108	XMR (not correct selection bias)	1500	-0.0115	0.0236397	0.62532	7.1218e-06	6.53912e-05	2.79512e-05	0.000276935	0.41537	1499.85	0.9999	5e-05	1
3062	1747_5	Forced vital capacity (FVC)	Hair colour (natural	383471	5978	XMR (not correct selection bias)	1551	-0.0208	0.0248352	0.40144	3.19425e-06	5.726e-05	2.58698e-05	0.000251874	0.390621	1550.84	0.9999	5e-05	1
3063	1747_5	Forced expiratory volume in 1-second (FEV1)	Hair colour (natural	383471	5978	XMR (not correct selection bias)	1392	0.0256	0.0279893	0.35997	3.7352e-06	5.70905e-05	1.78277e-05	0.000230784	0.321217	1391.86	0.9999	5e-05	1
3064	1747_5	Peak expiratory flow (PEF)	Hair colour (natural	383471	5978	XMR (not correct selection bias)	719	0.0694	0.0442277	0.11674	2.56589e-06	5.45444e-05	2.67888e-05	0.000186534	0.134104	718.928	0.9999	5e-05	1
50	1747_5	Standing height	Hair colour (natural	419596	6556	XMR (not correct selection bias)	3350	-0.0011	0.00730172	0.88089	9.44738e-06	6.82333e-05	3.84177e-05	0.000296736	0.993965	3349.65	0.999897	5e-05	1
51	1747_5	Seated height	Hair colour (natural	419245	6554	XMR (not correct selection bias)	2070	0.0226	0.0214988	0.29228	4.44678e-06	6.18829e-05	3.05874e-05	0.000249458	0.516324	2069.79	0.9999	5e-05	1

## Sheet: Table S8-nc AFR results 4-CAUSE
Table S8	Results of negative control study in Africans by CAUSE under other three IV selection thresholds (1e-3, 1e-4, 1e-5)
column description:
exposure: phecode of the exposure
outcome: phecode of the outcome
exposure_name: description of the exposure
outcome_name: description of the outcome
Threshold: IV selection threshold
nIV: number of IVs used
beta: causal effect estimate by CAUSE
beta.se: standard error of the causal effect estimate by CAUSE
beta.pvalue: p-value of the causal effect estimate by CAUSE
exposure	outcome	exposure_name	outcome_name	Threshold	nIV	beta	beta.se	beta.pvalue
50	1727	Standing height	Ease of skin tanning	1e-05	14	-3.23006e-15	0.204927	0.841345
50	1727	Standing height	Ease of skin tanning	0.0001	81	3.7019e-15	0.471015	0.922652
50	1727	Standing height	Ease of skin tanning	0.001	506	1.25594e-15	0.471015	0.5
50	1747_5	Standing height	Hair colour (natural	1e-05	14	0.00181649	0.197638	1
50	1747_5	Standing height	Hair colour (natural	0.0001	81	-0.423609	0.246233	0.265168
50	1747_5	Standing height	Hair colour (natural	0.001	506	-0.0630598	0.176751	0.97661
51	1727	Seated height	Ease of skin tanning	1e-05	9	1.54737e-15	0.26234	NA
51	1727	Seated height	Ease of skin tanning	0.0001	72	9.52016e-15	0.496288	0.841345
51	1727	Seated height	Ease of skin tanning	0.001	498	6.67869e-15	0.586892	0.921559
51	1747_5	Seated height	Hair colour (natural	1e-05	9	-0.108118	0.17483	0.268013
51	1747_5	Seated height	Hair colour (natural	0.0001	72	-0.325993	0.374839	0.0263663
51	1747_5	Seated height	Hair colour (natural	0.001	498	-0.471388	0.335161	0.139305
3062	1727	Forced vital capacity (FVC)	Ease of skin tanning	1e-05	NA	NA	NA	NA
3062	1727	Forced vital capacity (FVC)	Ease of skin tanning	0.0001	60	0.02334	0.30259	0.999995
3062	1727	Forced vital capacity (FVC)	Ease of skin tanning	0.001	472	-4.95784e-15	0.818329	0.24577
3062	1747_5	Forced vital capacity (FVC)	Hair colour (natural	1e-05	NA	NA	NA	NA
3062	1747_5	Forced vital capacity (FVC)	Hair colour (natural	0.0001	60	-0.118976	0.317911	0.240333
3062	1747_5	Forced vital capacity (FVC)	Hair colour (natural	0.001	472	-0.129468	0.342375	0.533782
3063	1727	Forced expiratory volume in 1-second (FEV1)	Ease of skin tanning	1e-05	NA	NA	NA	NA
3063	1727	Forced expiratory volume in 1-second (FEV1)	Ease of skin tanning	0.0001	61	0.00691275	0.359506	0.997678
3063	1727	Forced expiratory volume in 1-second (FEV1)	Ease of skin tanning	0.001	467	-6.22072e-15	0.756047	0.984077
3063	1747_5	Forced expiratory volume in 1-second (FEV1)	Hair colour (natural	1e-05	NA	NA	NA	NA
3063	1747_5	Forced expiratory volume in 1-second (FEV1)	Hair colour (natural	0.0001	61	-0.139699	0.309684	0.316143
3063	1747_5	Forced expiratory volume in 1-second (FEV1)	Hair colour (natural	0.001	467	0.0357079	0.358566	0.999911
3064	1727	Peak expiratory flow (PEF)	Ease of skin tanning	1e-05	5	2.40346e-15	0.166494	NA
3064	1727	Peak expiratory flow (PEF)	Ease of skin tanning	0.0001	67	1.56819e-15	0.526911	0.922929
3064	1727	Peak expiratory flow (PEF)	Ease of skin tanning	0.001	471	5.90847e-15	0.544118	0.99943
3064	1747_5	Peak expiratory flow (PEF)	Hair colour (natural	1e-05	5	0.0371195	0.241853	0.161865
3064	1747_5	Peak expiratory flow (PEF)	Hair colour (natural	0.0001	67	0.372277	0.388509	0.0142424
3064	1747_5	Peak expiratory flow (PEF)	Hair colour (natural	0.001	471	0.41105	0.400345	0.111944
20015	1727	Sitting height	Ease of skin tanning	1e-05	8	-2.44769e-15	0.190471	NA
20015	1727	Sitting height	Ease of skin tanning	0.0001	71	0.0115582	0.334126	1
20015	1727	Sitting height	Ease of skin tanning	0.001	530	-4.68375e-15	0.545677	NA
20015	1747_5	Sitting height	Hair colour (natural	1e-05	8	-0.00290777	0.115071	0.999994
20015	1747_5	Sitting height	Hair colour (natural	0.0001	71	0.153776	0.257807	0.740599
20015	1747_5	Sitting height	Hair colour (natural	0.001	530	-0.0796252	0.201759	0.969026
21002	1727	Weight	Ease of skin tanning	1e-05	4	2.64025e-15	0.193876	NA
21002	1727	Weight	Ease of skin tanning	0.0001	55	-1.48839e-15	0.535326	NA
21002	1727	Weight	Ease of skin tanning	0.001	466	-5.2007e-15	0.634003	0.00123847
21002	1747_5	Weight	Hair colour (natural	1e-05	4	0.0347429	0.175	0.0555653
21002	1747_5	Weight	Hair colour (natural	0.0001	55	-0.283331	0.313974	0.146658
21002	1747_5	Weight	Hair colour (natural	0.001	466	-0.0903745	0.213412	0.941383
23098	1727	Weight	Ease of skin tanning	1e-05	7	-1.40513e-15	0.23069	NA
23098	1727	Weight	Ease of skin tanning	0.0001	64	1.18204e-14	0.548281	NA
23098	1727	Weight	Ease of skin tanning	0.001	484	-0.318219	0.32044	0.58629
23098	1747_5	Weight	Hair colour (natural	1e-05	7	0.00239616	0.206615	0.985679
23098	1747_5	Weight	Hair colour (natural	0.0001	64	-0.166107	0.227141	0.125012
23098	1747_5	Weight	Hair colour (natural	0.001	484	-0.122678	0.263489	0.947672
23099	1727	Body fat percentage	Ease of skin tanning	1e-05	8	-5.5754e-15	0.283478	0.841345
23099	1727	Body fat percentage	Ease of skin tanning	0.0001	72	-7.26849e-15	0.286615	NA
23099	1727	Body fat percentage	Ease of skin tanning	0.001	481	-4.7462e-15	0.695244	0.658324
23099	1747_5	Body fat percentage	Hair colour (natural	1e-05	8	0.016302	0.16386	0.894543
23099	1747_5	Body fat percentage	Hair colour (natural	0.0001	72	0.0970138	0.308553	0.91049
23099	1747_5	Body fat percentage	Hair colour (natural	0.001	481	0.23135	0.211577	0.412933
23100	1727	Whole body fat mass	Ease of skin tanning	1e-05	5	1.08333e-15	0.196608	NA
23100	1727	Whole body fat mass	Ease of skin tanning	0.0001	59	-2.05183e-14	0.536737	NA
23100	1727	Whole body fat mass	Ease of skin tanning	0.001	484	8.63545e-15	0.59471	0.0444652
23100	1747_5	Whole body fat mass	Hair colour (natural	1e-05	5	-0.00336883	0.245437	0.711503
23100	1747_5	Whole body fat mass	Hair colour (natural	0.0001	59	-0.0220271	0.267849	0.978045
23100	1747_5	Whole body fat mass	Hair colour (natural	0.001	484	0.122062	0.276507	0.909945
23101	1727	Whole body fat-free mass	Ease of skin tanning	1e-05	9	-1.56819e-15	0.212065	0.158655
23101	1727	Whole body fat-free mass	Ease of skin tanning	0.0001	75	-2.25861e-15	0.365967	NA
23101	1727	Whole body fat-free mass	Ease of skin tanning	0.001	513	-0.228055	0.253611	0.656595
23101	1747_5	Whole body fat-free mass	Hair colour (natural	1e-05	9	0.0378209	0.218656	0.742503
23101	1747_5	Whole body fat-free mass	Hair colour (natural	0.0001	75	-0.269532	0.276387	0.365192
23101	1747_5	Whole body fat-free mass	Hair colour (natural	0.001	513	-0.193127	0.19038	0.609278
23102	1727	Whole body water mass	Ease of skin tanning	1e-05	9	5.01335e-15	0.350553	NA
23102	1727	Whole body water mass	Ease of skin tanning	0.0001	73	-0.375922	0.329674	0.111249
23102	1727	Whole body water mass	Ease of skin tanning	0.001	518	9.24955e-15	0.574585	0.871646
23102	1747_5	Whole body water mass	Hair colour (natural	1e-05	9	0.0105928	0.214468	0.932093
23102	1747_5	Whole body water mass	Hair colour (natural	0.0001	73	-0.236207	0.250142	0.393431
23102	1747_5	Whole body water mass	Hair colour (natural	0.001	518	-0.244386	0.203664	0.469778
23105	1727	Basal metabolic rate	Ease of skin tanning	1e-05	6	-5.34295e-16	0.210442	0.841345
23105	1727	Basal metabolic rate	Ease of skin tanning	0.0001	74	8.00748e-15	0.544214	0.629799
23105	1727	Basal metabolic rate	Ease of skin tanning	0.001	499	-0.457891	0.260472	0.236752
23105	1747_5	Basal metabolic rate	Hair colour (natural	1e-05	6	-0.00621598	0.159122	1
23105	1747_5	Basal metabolic rate	Hair colour (natural	0.0001	74	-0.322687	0.300483	0.153111
23105	1747_5	Basal metabolic rate	Hair colour (natural	0.001	499	-0.241417	0.189378	0.428073
23106	1727	Impedance of whole body	Ease of skin tanning	1e-05	NA	NA	NA	NA
23106	1727	Impedance of whole body	Ease of skin tanning	0.0001	53	0.111978	0.438166	0.84115
23106	1727	Impedance of whole body	Ease of skin tanning	0.001	511	0.438466	0.325639	0.348338
23106	1747_5	Impedance of whole body	Hair colour (natural	1e-05	NA	NA	NA	NA
23106	1747_5	Impedance of whole body	Hair colour (natural	0.0001	53	-0.0534151	0.237802	0.900972
23106	1747_5	Impedance of whole body	Hair colour (natural	0.001	511	-0.00540027	0.235378	1
23109	1727	Impedance of arm (right)	Ease of skin tanning	1e-05	7	-1.80758e-15	0.331093	NA
23109	1727	Impedance of arm (right)	Ease of skin tanning	0.0001	70	8.29198e-16	0.456647	NA
23109	1727	Impedance of arm (right)	Ease of skin tanning	0.001	509	1.36453e-14	0.48271	0.999904
23109	1747_5	Impedance of arm (right)	Hair colour (natural	1e-05	7	-0.00842795	0.143507	0.999337
23109	1747_5	Impedance of arm (right)	Hair colour (natural	0.0001	70	-0.0163592	0.225782	1
23109	1747_5	Impedance of arm (right)	Hair colour (natural	0.001	509	0.228325	0.24004	0.57128
23110	1727	Impedance of arm (left)	Ease of skin tanning	1e-05	5	-0.00194714	0.134548	0.989945
23110	1727	Impedance of arm (left)	Ease of skin tanning	0.0001	58	-3.46945e-18	0.423399	NA
23110	1727	Impedance of arm (left)	Ease of skin tanning	0.001	471	-1.71391e-14	0.525957	0.39086
23110	1747_5	Impedance of arm (left)	Hair colour (natural	1e-05	5	-0.0108975	0.190462	0.88837
23110	1747_5	Impedance of arm (left)	Hair colour (natural	0.0001	58	-0.0551939	0.252096	0.47429
23110	1747_5	Impedance of arm (left)	Hair colour (natural	0.001	471	-0.0773713	0.304893	0.990236
23113	1727	Leg fat-free mass (right)	Ease of skin tanning	1e-05	11	5.89806e-15	0.268387	NA
23113	1727	Leg fat-free mass (right)	Ease of skin tanning	0.0001	58	1.2098e-14	0.384357	0.158655
23113	1727	Leg fat-free mass (right)	Ease of skin tanning	0.001	527	3.60822e-16	0.669147	0.137573
23113	1747_5	Leg fat-free mass (right)	Hair colour (natural	1e-05	11	-0.00225203	0.20927	0.999999
23113	1747_5	Leg fat-free mass (right)	Hair colour (natural	0.0001	58	-0.0858003	0.263144	0.828216
23113	1747_5	Leg fat-free mass (right)	Hair colour (natural	0.001	527	-0.399511	0.233033	0.186107
23114	1727	Leg predicted mass (right)	Ease of skin tanning	1e-05	10	-0.000487809	0.137273	0.999981
23114	1727	Leg predicted mass (right)	Ease of skin tanning	0.0001	56	1.51198e-14	0.379653	NA
23114	1727	Leg predicted mass (right)	Ease of skin tanning	0.001	548	9.88792e-16	0.656511	0.999999
23114	1747_5	Leg predicted mass (right)	Hair colour (natural	1e-05	10	0.0129042	0.181829	0.872493
23114	1747_5	Leg predicted mass (right)	Hair colour (natural	0.0001	56	-0.0442489	0.214597	0.93736
23114	1747_5	Leg predicted mass (right)	Hair colour (natural	0.001	548	-0.297192	0.217848	0.337616
23117	1727	Leg fat-free mass (left)	Ease of skin tanning	1e-05	9	-3.9543e-15	0.135913	NA
23117	1727	Leg fat-free mass (left)	Ease of skin tanning	0.0001	64	-0.240413	0.332524	0.138839
23117	1727	Leg fat-free mass (left)	Ease of skin tanning	0.001	502	3.88578e-16	0.577872	1
23117	1747_5	Leg fat-free mass (left)	Hair colour (natural	1e-05	9	-0.0056031	0.225231	0.981798
23117	1747_5	Leg fat-free mass (left)	Hair colour (natural	0.0001	64	-0.217465	0.308838	0.191966
23117	1747_5	Leg fat-free mass (left)	Hair colour (natural	0.001	502	-0.422364	0.271954	0.273589
23118	1727	Leg predicted mass (left)	Ease of skin tanning	1e-05	8	1.3262e-15	0.135797	NA
23118	1727	Leg predicted mass (left)	Ease of skin tanning	0.0001	65	-0.235206	0.334777	0.130682
23118	1727	Leg predicted mass (left)	Ease of skin tanning	0.001	499	-0.594538	0.322663	0.162334
23118	1747_5	Leg predicted mass (left)	Hair colour (natural	1e-05	8	-0.0183475	0.22545	0.90001
23118	1747_5	Leg predicted mass (left)	Hair colour (natural	0.0001	65	-0.17561	0.307679	0.398602
23118	1747_5	Leg predicted mass (left)	Hair colour (natural	0.001	499	-0.40218	0.289931	0.33823
23119	1727	Arm fat percentage (right)	Ease of skin tanning	1e-05	7	2.32453e-16	0.269114	NA
23119	1727	Arm fat percentage (right)	Ease of skin tanning	0.0001	62	-1.52656e-16	0.369703	NA
23119	1727	Arm fat percentage (right)	Ease of skin tanning	0.001	474	-1.12826e-14	0.594942	0.996124
23119	1747_5	Arm fat percentage (right)	Hair colour (natural	1e-05	7	-0.0135826	0.142074	0.965546
23119	1747_5	Arm fat percentage (right)	Hair colour (natural	0.0001	62	-0.0109845	0.232752	0.999929
23119	1747_5	Arm fat percentage (right)	Hair colour (natural	0.001	474	0.163935	0.208911	0.671603
23120	1727	Arm fat mass (right)	Ease of skin tanning	1e-05	6	-0.0112426	0.15166	1
23120	1727	Arm fat mass (right)	Ease of skin tanning	0.0001	60	-2.76862e-15	0.411684	0.923117
23120	1727	Arm fat mass (right)	Ease of skin tanning	0.001	490	1.58311e-14	0.602392	0.0123754
23120	1747_5	Arm fat mass (right)	Hair colour (natural	1e-05	6	0.00330935	0.138417	0.895978
23120	1747_5	Arm fat mass (right)	Hair colour (natural	0.0001	60	-0.0506268	0.247471	0.936065
23120	1747_5	Arm fat mass (right)	Hair colour (natural	0.001	490	0.116067	0.274235	0.920686
23121	1727	Arm fat-free mass (right)	Ease of skin tanning	1e-05	8	-6.03684e-16	0.209266	NA
23121	1727	Arm fat-free mass (right)	Ease of skin tanning	0.0001	79	4.25354e-15	0.369291	0.0773149
23121	1727	Arm fat-free mass (right)	Ease of skin tanning	0.001	495	1.44051e-14	0.509797	5.41243e-07
23121	1747_5	Arm fat-free mass (right)	Hair colour (natural	1e-05	8	-0.000443788	0.177221	0.999877
23121	1747_5	Arm fat-free mass (right)	Hair colour (natural	0.0001	79	-0.17535	0.169584	0.325203
23121	1747_5	Arm fat-free mass (right)	Hair colour (natural	0.001	495	-0.17558	0.150939	0.531271
23122	1727	Arm predicted mass (right)	Ease of skin tanning	1e-05	9	3.54664e-15	0.200066	0.841345
23122	1727	Arm predicted mass (right)	Ease of skin tanning	0.0001	61	-1.3739e-15	0.383273	NA
23122	1727	Arm predicted mass (right)	Ease of skin tanning	0.001	476	1.82562e-14	0.516822	0.0655753
23122	1747_5	Arm predicted mass (right)	Hair colour (natural	1e-05	9	-0.0489236	0.179651	0.798474
23122	1747_5	Arm predicted mass (right)	Hair colour (natural	0.0001	61	-0.108859	0.20972	0.583734
23122	1747_5	Arm predicted mass (right)	Hair colour (natural	0.001	476	-0.289826	0.168343	0.215602
23123	1727	Arm fat percentage (left)	Ease of skin tanning	1e-05	10	2.60902e-15	0.259834	0.158655
23123	1727	Arm fat percentage (left)	Ease of skin tanning	0.0001	63	-2.76515e-15	0.354978	0.158655
23123	1727	Arm fat percentage (left)	Ease of skin tanning	0.001	479	-0.249805	0.460281	0.517438
23123	1747_5	Arm fat percentage (left)	Hair colour (natural	1e-05	10	-0.0656881	0.210472	0.812553
23123	1747_5	Arm fat percentage (left)	Hair colour (natural	0.0001	63	-0.032334	0.150936	0.970267
23123	1747_5	Arm fat percentage (left)	Hair colour (natural	0.001	479	0.378703	0.368592	0.198354
23124	1727	Arm fat mass (left)	Ease of skin tanning	1e-05	6	9.54098e-18	0.150141	0.158655
23124	1727	Arm fat mass (left)	Ease of skin tanning	0.0001	58	1.39333e-14	0.407076	0.841345
23124	1727	Arm fat mass (left)	Ease of skin tanning	0.001	497	-8.72219e-15	0.552124	0.946134
23124	1747_5	Arm fat mass (left)	Hair colour (natural	1e-05	6	0.00632069	0.136349	0.988005
23124	1747_5	Arm fat mass (left)	Hair colour (natural	0.0001	58	-0.0902899	0.257231	0.7064
23124	1747_5	Arm fat mass (left)	Hair colour (natural	0.001	497	0.13902	0.257946	0.903944
23125	1727	Arm fat-free mass (left)	Ease of skin tanning	1e-05	6	-3.08781e-16	0.203824	NA
23125	1727	Arm fat-free mass (left)	Ease of skin tanning	0.0001	56	3.67761e-16	0.377894	NA
23125	1727	Arm fat-free mass (left)	Ease of skin tanning	0.001	480	-0.536814	0.362323	0.312794
23125	1747_5	Arm fat-free mass (left)	Hair colour (natural	1e-05	6	0.0012767	0.141265	0.999973
23125	1747_5	Arm fat-free mass (left)	Hair colour (natural	0.0001	56	-0.164053	0.309158	0.404511
23125	1747_5	Arm fat-free mass (left)	Hair colour (natural	0.001	480	-0.360187	0.273621	0.308257
23126	1727	Arm predicted mass (left)	Ease of skin tanning	1e-05	10	9.08995e-16	0.201333	NA
23126	1727	Arm predicted mass (left)	Ease of skin tanning	0.0001	56	2.44249e-15	0.421881	0.158655
23126	1727	Arm predicted mass (left)	Ease of skin tanning	0.001	503	-0.299865	0.389622	0.647658
23126	1747_5	Arm predicted mass (left)	Hair colour (natural	1e-05	10	0.0548209	0.187345	0.948658
23126	1747_5	Arm predicted mass (left)	Hair colour (natural	0.0001	56	-0.138219	0.243268	0.179599
23126	1747_5	Arm predicted mass (left)	Hair colour (natural	0.001	503	-0.381973	0.282919	0.294345
23129	1727	Trunk fat-free mass	Ease of skin tanning	1e-05	8	1.07813e-15	0.129166	NA
23129	1727	Trunk fat-free mass	Ease of skin tanning	0.0001	63	8.37178e-15	0.398366	NA
23129	1727	Trunk fat-free mass	Ease of skin tanning	0.001	492	1.09981e-15	0.59065	0.000292039
23129	1747_5	Trunk fat-free mass	Hair colour (natural	1e-05	8	0.0608766	0.198475	0.575052
23129	1747_5	Trunk fat-free mass	Hair colour (natural	0.0001	63	-0.0819544	0.237122	0.939257
23129	1747_5	Trunk fat-free mass	Hair colour (natural	0.001	492	-0.190589	0.202233	0.60603
23130	1727	Trunk predicted mass	Ease of skin tanning	1e-05	9	-0.00373246	0.127871	1
23130	1727	Trunk predicted mass	Ease of skin tanning	0.0001	66	7.75421e-15	0.398422	NA
23130	1727	Trunk predicted mass	Ease of skin tanning	0.001	494	1.1758e-14	0.592863	0.582507
23130	1747_5	Trunk predicted mass	Hair colour (natural	1e-05	9	0.0703176	0.195428	0.399634
23130	1747_5	Trunk predicted mass	Hair colour (natural	0.0001	66	-0.0730584	0.246966	0.990026
23130	1747_5	Trunk predicted mass	Hair colour (natural	0.001	494	-0.126755	0.182458	0.833686
30100	1727	Mean platelet (thrombocyte) volume	Ease of skin tanning	1e-05	18	0.0071808	0.215868	0.985206
30100	1727	Mean platelet (thrombocyte) volume	Ease of skin tanning	0.0001	81	0.106711	0.383813	0.807384
30100	1727	Mean platelet (thrombocyte) volume	Ease of skin tanning	0.001	484	-0.00940615	0.39152	1
30100	1747_5	Mean platelet (thrombocyte) volume	Hair colour (natural	1e-05	18	0.0512832	0.235708	0.496512
30100	1747_5	Mean platelet (thrombocyte) volume	Hair colour (natural	0.0001	81	0.0307801	0.314254	0.998095
30100	1747_5	Mean platelet (thrombocyte) volume	Hair colour (natural	0.001	484	-0.0795334	0.34142	0.962967
30300	1727	High light scatter reticulocyte count	Ease of skin tanning	1e-05	16	-0.00209359	0.212307	0.99986
30300	1727	High light scatter reticulocyte count	Ease of skin tanning	0.0001	60	-0.025412	0.423034	0.996334
30300	1727	High light scatter reticulocyte count	Ease of skin tanning	0.001	423	-0.449903	0.403159	0.262408
30300	1747_5	High light scatter reticulocyte count	Hair colour (natural	1e-05	16	-0.0151392	0.193318	0.990869
30300	1747_5	High light scatter reticulocyte count	Hair colour (natural	0.0001	60	-0.0794379	0.288885	0.817225
30300	1747_5	High light scatter reticulocyte count	Hair colour (natural	0.001	423	-0.371802	0.342703	0.320663
30600	1727	Albumin	Ease of skin tanning	1e-05	7	-0.0267193	0.145143	0.843243
30600	1727	Albumin	Ease of skin tanning	0.0001	57	-6.09929e-15	0.374686	NA
30600	1727	Albumin	Ease of skin tanning	0.001	498	-3.49477e-14	0.607668	0.044474
30600	1747_5	Albumin	Hair colour (natural	1e-05	7	0.0550743	0.255917	0.223011
30600	1747_5	Albumin	Hair colour (natural	0.0001	57	0.119866	0.281943	0.646598
30600	1747_5	Albumin	Hair colour (natural	0.001	498	-0.0675168	0.252052	0.997037
30870	1727	Triglycerides	Ease of skin tanning	1e-05	9	-2.46678e-15	0.264807	NA
30870	1727	Triglycerides	Ease of skin tanning	0.0001	63	-4.94049e-15	0.329518	NA
30870	1727	Triglycerides	Ease of skin tanning	0.001	503	-0.339232	0.178509	0.216692
30870	1747_5	Triglycerides	Hair colour (natural	1e-05	9	-0.155723	0.172355	0.0080312
30870	1747_5	Triglycerides	Hair colour (natural	0.0001	63	-0.181299	0.158667	0.31737
30870	1747_5	Triglycerides	Hair colour (natural	0.001	503	-0.307304	0.161255	0.17223
30890	1727	Vitamin D	Ease of skin tanning	1e-05	10	-0.127281	0.157639	0.539568
30890	1727	Vitamin D	Ease of skin tanning	0.0001	63	-0.21309	0.194611	0.473473
30890	1727	Vitamin D	Ease of skin tanning	0.001	445	-0.154436	0.171526	0.657863
30890	1747_5	Vitamin D	Hair colour (natural	1e-05	10	-0.0402758	0.203105	0.209685
30890	1747_5	Vitamin D	Hair colour (natural	0.0001	63	-0.208096	0.204926	0.242103
30890	1747_5	Vitamin D	Hair colour (natural	0.001	445	-0.292308	0.216074	0.250664

## Sheet: Table S9-nc AFR results 5
Table S9	Results of negative control study in Africans across three XMR variants (sigma12f=0, dt unmodeled 1, dt unmodeled 2) under the IV selection threshold 5e-5
column description:
exposure: phecode of the exposure
outcome: phecode of the outcome
exposure_name: description of the exposure
outcome_name: description of the outcome
exp_N1: sample size of the exposure trait in the auxiliary population
exp_N2: sample size of the exposure trait in the target population
method: specify the correponding XMR variant
nIV: number of IVs used
beta: causal effect estimate
beta.se: standard error of the causal effect estimate
beta.pvalue: p-value of the causal effect estimate
tau.sq: the (3,3) element in the estimated covariance of the causal inference mudule; variance of SNP's direct effect on outcome alpha_j
sigmax11: the (1,1) element in the estimated covariance of the causal inference mudule; variance of SNP's latent true effect on the auxiliary exposure gamma_1,j
sigmax12: the (1,2) element in the estimated covariance of the causal inference mudule; covariance of gamma_1,j and gamma_2,j
sigmax22: the (2,2) element in the estimated covariance of the causal inference mudule; variance of SNP's latent true effect on the target exposure gamma_2,j
IVsignal.sum: total IV strength
nvalid: number of valid IVs detected by the XMR variant
pi0: The probability of IVs to be valid
Threshold: IV selection threshold
Threshold_modified: modified threshold used in the fitting algorithm
exposure	outcome	exposure_name	outcome_name	exp_N1	exp_N2	method	nIV	beta	beta.se	beta.pvalue	tau.sq	sigmax11	sigmax12	sigmax22	IVsignal.sum	nvalid	pi0	Threshold	Threshold_modified
30600	1727	Albumin	Ease of skin tanning	367192	5759	XMR (sigma12f=0)	943	-0.1007	0.0785634	0.19985	2.73137e-05	8.52686e-05	0	0.000553547	0.0490094	87.7159	0.0930179	5e-05	3.51193e-07
30870	1727	Triglycerides	Ease of skin tanning	400639	6211	XMR (sigma12f=0)	1295	0.0211	0.061934	0.7337	4.04524e-05	9.41258e-05	0	0.000643308	0.0877081	135.484	0.104621	5e-05	3.40156e-07
30890	1727	Vitamin D	Ease of skin tanning	383324	6046	XMR (sigma12f=0)	435	-0.0767	0.108873	0.48104	1.73444e-05	0.000122034	0	0.000576444	0.0213517	36.7015	0.0843712	5e-05	3.56649e-07
20015	1727	Sitting height	Ease of skin tanning	419233	6554	XMR (sigma12f=0)	2952	-0.0484	0.0392348	0.21748	2.56924e-05	5.87017e-05	0	0.000598889	0.282885	469.648	0.159095	5e-05	3.48097e-07
21002	1727	Weight	Ease of skin tanning	419316	6558	XMR (sigma12f=0)	2435	0.0348	0.0595951	0.5588	7.37862e-05	4.26982e-05	0	0.000659388	0.122807	185.724	0.0762728	5e-05	3.48491e-07
23098	1727	Weight	Ease of skin tanning	413194	6458	XMR (sigma12f=0)	2331	0.0254	0.0570617	0.65608	8.04625e-05	3.96108e-05	0	0.000676657	0.123004	181.064	0.0776764	5e-05	3.47861e-07
23099	1727	Body fat percentage	Ease of skin tanning	412960	6455	XMR (sigma12f=0)	1917	0.0951	0.0978896	0.33115	0.00011709	4.09668e-05	0	0.000616833	0.0649834	101.543	0.0529699	5e-05	3.47959e-07
23100	1727	Whole body fat mass	Ease of skin tanning	412524	6450	XMR (sigma12f=0)	2235	0.0774	0.0798637	0.33262	9.24971e-05	3.353e-05	0	0.000664779	0.0948151	140.787	0.0629919	5e-05	3.48228e-07
23101	1727	Whole body fat-free mass	Ease of skin tanning	413158	6456	XMR (sigma12f=0)	2627	-0.0276	0.0472693	0.55912	3.66486e-05	5.02394e-05	0	0.000603297	0.159776	263.998	0.100494	5e-05	3.47649e-07
23102	1727	Whole body water mass	Ease of skin tanning	413190	6458	XMR (sigma12f=0)	2584	-0.0202	0.0457706	0.65953	3.87713e-05	5.11652e-05	0	0.000592602	0.159186	267.734	0.103612	5e-05	3.47871e-07
23105	1727	Basal metabolic rate	Ease of skin tanning	413178	6458	XMR (sigma12f=0)	2581	-0.0035	0.0210037	0.86819	3.8567e-05	4.99135e-05	0	0.000610769	0.15071	246.235	0.0954028	5e-05	3.47898e-07
23106	1727	Impedance of whole body	Ease of skin tanning	413153	6458	XMR (sigma12f=0)	2284	-0.0449	0.0548506	0.41261	3.53613e-05	2.5902e-05	0	0.000614302	0.126799	205.184	0.0898354	5e-05	3.47956e-07
23109	1727	Impedance of arm (right)	Ease of skin tanning	413141	6458	XMR (sigma12f=0)	2244	0.0433	0.0667067	0.51669	3.58866e-05	4.08819e-05	0	0.000611592	0.103179	168.01	0.0748706	5e-05	3.47984e-07
23110	1727	Impedance of arm (left)	Ease of skin tanning	413157	6458	XMR (sigma12f=0)	2050	0.1372	0.072516	0.058423	5.51574e-05	3.74642e-05	0	0.000652579	0.100079	152.614	0.0744457	5e-05	3.47947e-07
23113	1727	Leg fat-free mass (right)	Ease of skin tanning	413147	6458	XMR (sigma12f=0)	2450	0.0074	0.0308524	0.81144	4.69146e-05	4.07824e-05	0	0.000607893	0.149084	244.376	0.0997454	5e-05	3.4797e-07
23114	1727	Leg predicted mass (right)	Ease of skin tanning	413146	6458	XMR (sigma12f=0)	2490	0.0146	0.0421155	0.72897	4.31654e-05	4.04653e-05	0	0.00061556	0.153157	247.751	0.0994984	5e-05	3.47972e-07
23117	1727	Leg fat-free mass (left)	Ease of skin tanning	413118	6455	XMR (sigma12f=0)	2543	-0.0158	0.0462426	0.73186	3.81726e-05	4.44155e-05	0	0.00060959	0.145491	237.874	0.0935408	5e-05	3.47594e-07
23118	1727	Leg predicted mass (left)	Ease of skin tanning	413113	6455	XMR (sigma12f=0)	2463	0.0027	0.0154685	0.86274	3.70346e-05	4.28119e-05	0	0.000599771	0.139485	231.854	0.0941348	5e-05	3.47605e-07
23119	1727	Arm fat percentage (right)	Ease of skin tanning	413107	6454	XMR (sigma12f=0)	1833	0.0329	0.0832273	0.69294	6.07018e-05	4.11966e-05	0	0.000641111	0.067892	105.437	0.0575216	5e-05	3.47471e-07
23120	1727	Arm fat mass (right)	Ease of skin tanning	413080	6454	XMR (sigma12f=0)	2017	0.0574	0.0753195	0.44572	8.97245e-05	3.27285e-05	0	0.000697812	0.0863999	122.231	0.0606005	5e-05	3.47534e-07
23121	1727	Arm fat-free mass (right)	Ease of skin tanning	413074	6454	XMR (sigma12f=0)	2348	-0.0286	0.0532153	0.59111	3.83761e-05	5.44097e-05	0	0.000600439	0.12558	208.372	0.0887445	5e-05	3.47547e-07
23122	1727	Arm predicted mass (right)	Ease of skin tanning	413067	6454	XMR (sigma12f=0)	2407	-0.0349	0.0517257	0.50046	2.67952e-05	4.81237e-05	0	0.00058021	0.128869	221.238	0.0919144	5e-05	3.47564e-07
23123	1727	Arm fat percentage (left)	Ease of skin tanning	413046	6454	XMR (sigma12f=0)	1844	0.0591	0.0857132	0.49063	5.65546e-05	3.69717e-05	0	0.00064472	0.0664621	102.427	0.0555461	5e-05	3.47612e-07
23124	1727	Arm fat mass (left)	Ease of skin tanning	413007	6454	XMR (sigma12f=0)	2094	0.0571	0.0823704	0.48794	9.02611e-05	3.0597e-05	0	0.00069112	0.0870156	124.099	0.0592641	5e-05	3.47702e-07
23125	1727	Arm fat-free mass (left)	Ease of skin tanning	412998	6453	XMR (sigma12f=0)	2368	0.0106	0.0413835	0.79769	3.66075e-05	4.52689e-05	0	0.00061931	0.138621	223.136	0.0942299	5e-05	3.47575e-07
23126	1727	Arm predicted mass (left)	Ease of skin tanning	412983	6453	XMR (sigma12f=0)	2388	-0.0236	0.0523294	0.65177	4.55194e-05	4.99462e-05	0	0.000611205	0.132675	216.36	0.0906028	5e-05	3.4761e-07
23129	1727	Trunk fat-free mass	Ease of skin tanning	412844	6451	XMR (sigma12f=0)	2501	-0.0328	0.0500858	0.51208	3.94912e-05	4.97229e-05	0	0.000598963	0.163923	272.695	0.109035	5e-05	3.47635e-07
23130	1727	Trunk predicted mass	Ease of skin tanning	412802	6451	XMR (sigma12f=0)	2484	-0.0252	0.0462722	0.58544	3.27804e-05	4.9478e-05	0	0.000603353	0.168036	277.37	0.111663	5e-05	3.47732e-07
30100	1727	Mean platelet (thrombocyte) volume	Ease of skin tanning	407987	6281	XMR (sigma12f=0)	1840	0.0558	0.0364368	0.12551	2.72937e-05	9.67078e-05	0	0.000696327	0.261301	370.616	0.201422	5e-05	3.33669e-07
30300	1727	High light scatter reticulocyte count	Ease of skin tanning	401345	6108	XMR (sigma12f=0)	1500	-0.0263	0.0485666	0.5878	3.72999e-05	7.21203e-05	0	0.000664822	0.131584	197.329	0.131553	5e-05	3.2316e-07
3062	1727	Forced vital capacity (FVC)	Ease of skin tanning	383471	5978	XMR (sigma12f=0)	1551	-0.0532	0.0866198	0.53929	5.1907e-05	4.17352e-05	0	0.000555461	0.0682985	122.165	0.0787651	5e-05	3.45405e-07
3063	1727	Forced expiratory volume in 1-second (FEV1)	Ease of skin tanning	383471	5978	XMR (sigma12f=0)	1392	0.0038	0.0226256	0.86598	5.76286e-05	4.8554e-05	0	0.000531522	0.0526097	98.5343	0.0707861	5e-05	3.45405e-07
3064	1727	Peak expiratory flow (PEF)	Ease of skin tanning	383471	5978	XMR (sigma12f=0)	719	-0.2724	0.216313	0.20799	4.97946e-05	5.14393e-05	0	0.000316891	0.0107103	33.424	0.0464868	5e-05	3.45405e-07
50	1727	Standing height	Ease of skin tanning	419596	6556	XMR (sigma12f=0)	3350	-0.0457	0.0302265	0.13059	3.19943e-05	4.51013e-05	0	0.000599343	0.480519	797	0.237911	5e-05	3.47562e-07
51	1727	Seated height	Ease of skin tanning	419245	6554	XMR (sigma12f=0)	2070	-0.072	0.0514931	0.1623	2.33672e-05	6.12302e-05	0	0.000557575	0.148878	265.323	0.128175	5e-05	3.48069e-07
30600	1747_5	Albumin	Hair colour (natural	367192	5759	XMR (sigma12f=0)	943	0.0627	0.0670034	0.34952	1.30271e-05	8.44953e-05	0	0.000552905	0.0495702	88.7989	0.0941664	5e-05	3.51193e-07
30870	1747_5	Triglycerides	Hair colour (natural	400639	6211	XMR (sigma12f=0)	1295	0.0018	0.0213062	0.93202	3.47445e-05	9.37062e-05	0	0.000643736	0.0882043	136.193	0.105168	5e-05	3.40156e-07
30890	1747_5	Vitamin D	Hair colour (natural	383324	6046	XMR (sigma12f=0)	435	0.0335	0.0928687	0.71822	3.29961e-05	0.000121916	0	0.000573774	0.0212491	36.7394	0.0844584	5e-05	3.56649e-07
20015	1747_5	Sitting height	Hair colour (natural	419233	6554	XMR (sigma12f=0)	2952	0.0021	0.0121458	0.86451	3.43295e-05	5.86047e-05	0	0.000600766	0.283006	469.367	0.159	5e-05	3.48097e-07
21002	1747_5	Weight	Hair colour (natural	419316	6558	XMR (sigma12f=0)	2435	-0.0003	0.00374682	0.94022	6.06154e-05	4.22577e-05	0	0.000665562	0.124877	187.001	0.0767969	5e-05	3.48491e-07
23098	1747_5	Weight	Hair colour (natural	413194	6458	XMR (sigma12f=0)	2331	-0.0078	0.0339961	0.81804	5.00208e-05	3.99406e-05	0	0.000683157	0.122728	179.098	0.0768331	5e-05	3.47861e-07
23099	1747_5	Body fat percentage	Hair colour (natural	412960	6455	XMR (sigma12f=0)	1917	-0.0397	0.0679492	0.55915	5.81696e-05	3.99947e-05	0	0.000647176	0.0662362	101.073	0.0527245	5e-05	3.47959e-07
23100	1747_5	Whole body fat mass	Hair colour (natural	412524	6450	XMR (sigma12f=0)	2235	-0.0878	0.0686141	0.2009	8.45851e-05	3.39793e-05	0	0.000652138	0.094149	141.027	0.0630994	5e-05	3.48228e-07
23101	1747_5	Whole body fat-free mass	Hair colour (natural	413158	6456	XMR (sigma12f=0)	2627	-0.0545	0.0435578	0.21069	2.54261e-05	5.04944e-05	0	0.000604644	0.159429	262.558	0.099946	5e-05	3.47649e-07
23102	1747_5	Whole body water mass	Hair colour (natural	413190	6458	XMR (sigma12f=0)	2584	-0.0419	0.0415949	0.31425	2.51818e-05	5.15836e-05	0	0.000594451	0.158128	264.958	0.102538	5e-05	3.47871e-07
23105	1747_5	Basal metabolic rate	Hair colour (natural	413178	6458	XMR (sigma12f=0)	2581	-0.0522	0.0466086	0.26249	3.04383e-05	5.02406e-05	0	0.000612106	0.150397	244.868	0.0948733	5e-05	3.47898e-07
23106	1747_5	Impedance of whole body	Hair colour (natural	413153	6458	XMR (sigma12f=0)	2284	-0.0586	0.0549433	0.28592	4.7044e-05	2.63575e-05	0	0.000618508	0.125896	202.386	0.0886104	5e-05	3.47956e-07
23109	1747_5	Impedance of arm (right)	Hair colour (natural	413141	6458	XMR (sigma12f=0)	2244	-0.0201	0.0535517	0.70746	6.71608e-05	4.03661e-05	0	0.00060468	0.103679	170.418	0.0759438	5e-05	3.47984e-07
23110	1747_5	Impedance of arm (left)	Hair colour (natural	413157	6458	XMR (sigma12f=0)	2050	-0.0283	0.0570835	0.61986	8.37118e-05	3.8542e-05	0	0.000637714	0.0965326	149.057	0.0727108	5e-05	3.47947e-07
23113	1747_5	Leg fat-free mass (right)	Hair colour (natural	413147	6458	XMR (sigma12f=0)	2450	0.007	0.0260993	0.78945	4.10665e-05	4.09074e-05	0	0.000608846	0.14881	243.555	0.0994103	5e-05	3.4797e-07
23114	1747_5	Leg predicted mass (right)	Hair colour (natural	413146	6458	XMR (sigma12f=0)	2490	0.0055	0.0235858	0.8165	3.66183e-05	4.06906e-05	0	0.000616115	0.152331	246.175	0.0988656	5e-05	3.47972e-07
23117	1747_5	Leg fat-free mass (left)	Hair colour (natural	413118	6455	XMR (sigma12f=0)	2543	-0.0499	0.0503951	0.32171	4.72331e-05	4.46282e-05	0	0.000610525	0.145353	236.959	0.093181	5e-05	3.47594e-07
23118	1747_5	Leg predicted mass (left)	Hair colour (natural	413113	6455	XMR (sigma12f=0)	2463	-0.0634	0.0520387	0.22329	4.9593e-05	4.29766e-05	0	0.000600346	0.139501	231.329	0.0939215	5e-05	3.47605e-07
23119	1747_5	Arm fat percentage (right)	Hair colour (natural	413107	6454	XMR (sigma12f=0)	1833	-0.0396	0.0719673	0.58219	5.70161e-05	4.14577e-05	0	0.000639872	0.0676558	105.202	0.0573931	5e-05	3.47471e-07
23120	1747_5	Arm fat mass (right)	Hair colour (natural	413080	6454	XMR (sigma12f=0)	2017	-0.0646	0.0696625	0.35352	7.6467e-05	3.36108e-05	0	0.000688077	0.0847194	120.126	0.0595566	5e-05	3.47534e-07
23121	1747_5	Arm fat-free mass (right)	Hair colour (natural	413074	6454	XMR (sigma12f=0)	2348	-0.0483	0.0483235	0.3172	2.22062e-05	5.4207e-05	0	0.000601903	0.126077	208.584	0.0888349	5e-05	3.47547e-07
23122	1747_5	Arm predicted mass (right)	Hair colour (natural	413067	6454	XMR (sigma12f=0)	2407	-0.067	0.047464	0.15795	3.33375e-05	4.79212e-05	0	0.000581706	0.129261	221.357	0.0919637	5e-05	3.47564e-07
23123	1747_5	Arm fat percentage (left)	Hair colour (natural	413046	6454	XMR (sigma12f=0)	1844	-0.0092	0.0484313	0.85002	9.26257e-05	3.87844e-05	0	0.000610467	0.0641971	101.464	0.055024	5e-05	3.47612e-07
23124	1747_5	Arm fat mass (left)	Hair colour (natural	413007	6454	XMR (sigma12f=0)	2094	-0.049	0.0694558	0.48022	9.09667e-05	3.2364e-05	0	0.000669575	0.0838665	120.754	0.0576669	5e-05	3.47702e-07
23125	1747_5	Arm fat-free mass (left)	Hair colour (natural	412998	6453	XMR (sigma12f=0)	2368	-0.0795	0.0468002	0.08918	2.8633e-05	4.55232e-05	0	0.000620674	0.138375	222.091	0.0937885	5e-05	3.47575e-07
23126	1747_5	Arm predicted mass (left)	Hair colour (natural	412983	6453	XMR (sigma12f=0)	2388	-0.0691	0.0486547	0.15574	2.51041e-05	5.00402e-05	0	0.000611994	0.132913	216.221	0.0905447	5e-05	3.4761e-07
23129	1747_5	Trunk fat-free mass	Hair colour (natural	412844	6451	XMR (sigma12f=0)	2501	-0.0646	0.0420306	0.12433	2.96e-05	4.97321e-05	0	0.000601618	0.164209	272.11	0.1088	5e-05	3.47635e-07
23130	1747_5	Trunk predicted mass	Hair colour (natural	412802	6451	XMR (sigma12f=0)	2484	-0.0577	0.0411582	0.16072	3.02512e-05	4.96151e-05	0	0.000605249	0.167774	276.117	0.111158	5e-05	3.47732e-07
30100	1747_5	Mean platelet (thrombocyte) volume	Hair colour (natural	407987	6281	XMR (sigma12f=0)	1840	-0.0325	0.0290487	0.26318	1.0176e-05	9.62456e-05	0	0.000698157	0.262232	371.663	0.201991	5e-05	3.33669e-07
30300	1747_5	High light scatter reticulocyte count	Hair colour (natural	401345	6108	XMR (sigma12f=0)	1500	-0.0555	0.0403017	0.16873	1.08092e-05	7.22273e-05	0	0.000663128	0.1311	197.037	0.131358	5e-05	3.2316e-07
3062	1747_5	Forced vital capacity (FVC)	Hair colour (natural	383471	5978	XMR (sigma12f=0)	1551	-0.0456	0.0716199	0.52435	3.34816e-05	4.19713e-05	0	0.000562412	0.0685674	121.23	0.0781628	5e-05	3.45405e-07
3063	1747_5	Forced expiratory volume in 1-second (FEV1)	Hair colour (natural	383471	5978	XMR (sigma12f=0)	1392	0.037	0.0678528	0.58565	1.76221e-05	4.87788e-05	0	0.000534412	0.0526669	98.1353	0.0704995	5e-05	3.45405e-07
3064	1747_5	Peak expiratory flow (PEF)	Hair colour (natural	383471	5978	XMR (sigma12f=0)	719	-0.0422	0.0943916	0.65497	4.37129e-05	5.23659e-05	0	0.000320206	0.0104037	32.5152	0.0452228	5e-05	3.45405e-07
50	1747_5	Standing height	Hair colour (natural	419596	6556	XMR (sigma12f=0)	3350	-0.0098	0.0219979	0.65726	2.36863e-05	4.54425e-05	0	0.000599886	0.477069	790.986	0.236115	5e-05	3.47562e-07
51	1747_5	Seated height	Hair colour (natural	419245	6554	XMR (sigma12f=0)	2070	0.015	0.0398763	0.70667	2.59422e-05	6.10585e-05	0	0.000560067	0.149368	265.38	0.128203	5e-05	3.48069e-07
30600	1727	Albumin	Ease of skin tanning	367192	5759	XMR (dt unmodeled1)	943	-0.028	0.0452316	0.53535	1.1624e-05	2.95546e-05	3.15166e-05	0.000381728	0.176619	408.209	0.432883	5e-05	5e-05
30870	1727	Triglycerides	Ease of skin tanning	400639	6211	XMR (dt unmodeled1)	1295	0.022	0.0419313	0.5996	1.34615e-05	4.28059e-05	3.25348e-05	0.000435421	0.198543	428.245	0.330691	5e-05	5e-05
30890	1727	Vitamin D	Ease of skin tanning	383324	6046	XMR (dt unmodeled1)	435	-0.0641	0.0824489	0.43711	1.50258e-05	6.1214e-05	6.05823e-05	0.000481988	0.0522122	96.0128	0.220719	5e-05	5e-05
20015	1727	Sitting height	Ease of skin tanning	419233	6554	XMR (dt unmodeled1)	2952	-0.0673	0.0227679	0.0031324	1.22508e-05	1.90003e-05	1.2328e-05	0.000352123	0.711646	1971.03	0.667691	5e-05	5e-05
21002	1727	Weight	Ease of skin tanning	419316	6558	XMR (dt unmodeled1)	2435	0.0152	0.0241248	0.52877	7.42293e-06	4.54405e-06	3.64446e-06	0.000229701	0.568109	2432.44	0.998951	5e-05	5e-05
23098	1727	Weight	Ease of skin tanning	413194	6458	XMR (dt unmodeled1)	2331	0.0202	0.0248468	0.41677	8.87708e-06	4.66582e-06	3.93139e-06	0.000235967	0.558268	2321.71	0.996015	5e-05	5e-05
23099	1727	Body fat percentage	Ease of skin tanning	412960	6455	XMR (dt unmodeled1)	1917	0.0601	0.0289977	0.038163	1.18687e-05	3.21374e-06	3.17442e-06	0.000225497	0.440421	1916.22	0.999596	5e-05	5e-05
23100	1727	Whole body fat mass	Ease of skin tanning	412524	6450	XMR (dt unmodeled1)	2235	0.0708	0.0274161	0.0098598	1.24482e-05	3.20826e-06	2.68626e-06	0.000220902	0.499926	2234.4	0.999732	5e-05	5e-05
23101	1727	Whole body fat-free mass	Ease of skin tanning	413158	6456	XMR (dt unmodeled1)	2627	-0.0082	0.0217387	0.70709	9.48324e-06	8.22614e-06	7.9443e-06	0.000261554	0.620449	2283.43	0.869216	5e-05	5e-05
23102	1727	Whole body water mass	Ease of skin tanning	413190	6458	XMR (dt unmodeled1)	2584	-0.0105	0.0236025	0.65615	1.35961e-05	1.0803e-05	9.71411e-06	0.000295738	0.577651	1878.14	0.726836	5e-05	5e-05
23105	1727	Basal metabolic rate	Ease of skin tanning	413178	6458	XMR (dt unmodeled1)	2581	0.0112	0.0231387	0.62756	8.34595e-06	9.07821e-06	8.08005e-06	0.000288359	0.59453	1993.67	0.772442	5e-05	5e-05
23106	1727	Impedance of whole body	Ease of skin tanning	413153	6458	XMR (dt unmodeled1)	2284	-0.0241	0.0251846	0.33833	9.58469e-06	4.68296e-06	5.38203e-06	0.000231632	0.547887	2282.12	0.999176	5e-05	5e-05
23109	1727	Impedance of arm (right)	Ease of skin tanning	413141	6458	XMR (dt unmodeled1)	2244	0.0816	0.0258548	0.0016082	5.68379e-06	4.7573e-06	4.43982e-06	0.000228977	0.521448	2220.73	0.989629	5e-05	5e-05
23110	1727	Impedance of arm (left)	Ease of skin tanning	413157	6458	XMR (dt unmodeled1)	2050	0.0559	0.0269832	0.038343	1.23327e-05	4.52459e-06	4.44354e-06	0.000236233	0.495853	2043.72	0.996937	5e-05	5e-05
23113	1727	Leg fat-free mass (right)	Ease of skin tanning	413147	6458	XMR (dt unmodeled1)	2450	-0.0061	0.0211805	0.77171	1.64239e-05	6.85584e-06	7.10064e-06	0.000252376	0.589785	2246.64	0.916995	5e-05	5e-05
23114	1727	Leg predicted mass (right)	Ease of skin tanning	413146	6458	XMR (dt unmodeled1)	2490	-0.0084	0.0224074	0.70803	1.43088e-05	6.41456e-06	7.2287e-06	0.000248048	0.599553	2314.01	0.929321	5e-05	5e-05
23117	1727	Leg fat-free mass (left)	Ease of skin tanning	413118	6455	XMR (dt unmodeled1)	2543	-0.0014	0.0101523	0.89214	1.28024e-05	7.33192e-06	6.62528e-06	0.00025713	0.578941	2182.35	0.858181	5e-05	5e-05
23118	1727	Leg predicted mass (left)	Ease of skin tanning	413113	6455	XMR (dt unmodeled1)	2463	0	0.000560456	0.94417	9.98262e-06	7.46107e-06	6.76875e-06	0.000258007	0.56193	2107.9	0.855825	5e-05	5e-05
23119	1727	Arm fat percentage (right)	Ease of skin tanning	413107	6454	XMR (dt unmodeled1)	1833	0.063	0.0288926	0.029291	1.07838e-05	3.46236e-06	3.67932e-06	0.000231289	0.434083	1832.48	0.999719	5e-05	5e-05
23120	1727	Arm fat mass (right)	Ease of skin tanning	413080	6454	XMR (dt unmodeled1)	2017	0.0577	0.0286634	0.043943	1.34491e-05	3.27952e-06	3.0151e-06	0.000223345	0.457709	2014.56	0.998788	5e-05	5e-05
23121	1727	Arm fat-free mass (right)	Ease of skin tanning	413074	6454	XMR (dt unmodeled1)	2348	-0.0053	0.0208593	0.79997	8.62032e-06	9.22591e-06	9.48054e-06	0.000271389	0.530234	1858.02	0.79132	5e-05	5e-05
23122	1727	Arm predicted mass (right)	Ease of skin tanning	413067	6454	XMR (dt unmodeled1)	2407	0.0006	0.00509697	0.9028	1.07431e-05	7.4147e-06	7.09081e-06	0.000247049	0.554062	2159.38	0.897126	5e-05	5e-05
23123	1727	Arm fat percentage (left)	Ease of skin tanning	413046	6454	XMR (dt unmodeled1)	1844	0.0742	0.028889	0.01023	1.22341e-05	3.17368e-06	3.15713e-06	0.000233446	0.438383	1843.54	0.999753	5e-05	5e-05
23124	1727	Arm fat mass (left)	Ease of skin tanning	413007	6454	XMR (dt unmodeled1)	2094	0.0595	0.0284005	0.036203	1.7065e-05	2.97146e-06	2.07735e-06	0.000225061	0.475168	2093.21	0.999621	5e-05	5e-05
23125	1727	Arm fat-free mass (left)	Ease of skin tanning	412998	6453	XMR (dt unmodeled1)	2368	0.02	0.0246597	0.41663	1.18956e-05	7.49201e-06	7.16855e-06	0.000263131	0.56215	2059.98	0.869922	5e-05	5e-05
23126	1727	Arm predicted mass (left)	Ease of skin tanning	412983	6453	XMR (dt unmodeled1)	2388	0.0001	0.00148776	0.92233	1.20179e-05	8.531e-06	8.64881e-06	0.000274734	0.555456	1933.69	0.809754	5e-05	5e-05
23129	1727	Trunk fat-free mass	Ease of skin tanning	412844	6451	XMR (dt unmodeled1)	2501	-0.0099	0.0241238	0.68213	1.71051e-05	1.22453e-05	9.98445e-06	0.000304439	0.551218	1747.23	0.698611	5e-05	5e-05
23130	1727	Trunk predicted mass	Ease of skin tanning	412802	6451	XMR (dt unmodeled1)	2484	-0.0041	0.0185753	0.82456	1.74845e-05	1.18904e-05	1.06784e-05	0.000302641	0.559867	1773.75	0.714069	5e-05	5e-05
30100	1727	Mean platelet (thrombocyte) volume	Ease of skin tanning	407987	6281	XMR (dt unmodeled1)	1840	0.0737	0.0286249	0.01	1.30513e-05	5.79469e-05	4.71237e-05	0.00047972	0.418971	815.758	0.443346	5e-05	5e-05
30300	1727	High light scatter reticulocyte count	Ease of skin tanning	401345	6108	XMR (dt unmodeled1)	1500	0.0287	0.0350763	0.41387	1.96695e-05	3.1122e-05	1.94986e-05	0.00044434	0.307463	668.213	0.445475	5e-05	5e-05
3062	1727	Forced vital capacity (FVC)	Ease of skin tanning	383471	5978	XMR (dt unmodeled1)	1551	-0.066	0.0347367	0.05734	2.59138e-05	9.26761e-06	7.3434e-06	0.000314544	0.34541	1063.34	0.685582	5e-05	5e-05
3063	1727	Forced expiratory volume in 1-second (FEV1)	Ease of skin tanning	383471	5978	XMR (dt unmodeled1)	1392	-0.0908	0.0399038	0.022909	1.72582e-05	1.07587e-05	5.6633e-06	0.000322166	0.266795	814.61	0.585208	5e-05	5e-05
3064	1727	Peak expiratory flow (PEF)	Ease of skin tanning	383471	5978	XMR (dt unmodeled1)	719	-0.2016	0.0677884	0.0029468	7.04013e-06	1.43538e-05	1.27457e-05	0.000305088	0.0882252	268.773	0.373815	5e-05	5e-05
50	1727	Standing height	Ease of skin tanning	419596	6556	XMR (dt unmodeled1)	3350	-0.0614	0.0196104	0.0017284	1.71765e-05	1.78586e-05	1.46142e-05	0.000328933	0.927561	2724.31	0.813228	5e-05	5e-05
51	1727	Seated height	Ease of skin tanning	419245	6554	XMR (dt unmodeled1)	2070	-0.0455	0.0297244	0.1262	9.85694e-06	2.09841e-05	1.56125e-05	0.00034651	0.42134	1164.14	0.562386	5e-05	5e-05
30600	1747_5	Albumin	Hair colour (natural	367192	5759	XMR (dt unmodeled1)	943	0.0655	0.0389954	0.093037	1.08827e-05	2.95213e-05	3.13089e-05	0.00038208	0.176871	408.878	0.433593	5e-05	5e-05
30870	1747_5	Triglycerides	Hair colour (natural	400639	6211	XMR (dt unmodeled1)	1295	0.0134	0.0352233	0.70263	1.5736e-05	4.2767e-05	3.24534e-05	0.000435874	0.198816	428.507	0.330893	5e-05	5e-05
30890	1747_5	Vitamin D	Hair colour (natural	383324	6046	XMR (dt unmodeled1)	435	-0.009	0.0634515	0.8869	2.13732e-05	6.14283e-05	6.14495e-05	0.000477817	0.051807	95.7614	0.220141	5e-05	5e-05
20015	1747_5	Sitting height	Hair colour (natural	419233	6554	XMR (dt unmodeled1)	2952	-0.0013	0.00877903	0.88093	1.15334e-05	1.89943e-05	1.23421e-05	0.000351992	0.711125	1970.08	0.66737	5e-05	5e-05
21002	1747_5	Weight	Hair colour (natural	419316	6558	XMR (dt unmodeled1)	2435	0.008	0.0197555	0.68578	9.57834e-06	4.56162e-06	3.65715e-06	0.000229982	0.568014	2429.31	0.997664	5e-05	5e-05
23098	1747_5	Weight	Hair colour (natural	413194	6458	XMR (dt unmodeled1)	2331	0.0215	0.0210051	0.30614	5.43054e-06	4.65634e-06	3.93266e-06	0.00023575	0.558466	2325.01	0.997432	5e-05	5e-05
23099	1747_5	Body fat percentage	Hair colour (natural	412960	6455	XMR (dt unmodeled1)	1917	-0.0149	0.0232531	0.52163	4.3424e-06	3.20505e-06	3.16857e-06	0.000225765	0.440767	1916.43	0.999703	5e-05	5e-05
23100	1747_5	Whole body fat mass	Hair colour (natural	412524	6450	XMR (dt unmodeled1)	2235	0.0038	0.0175986	0.83048	9.76733e-06	3.21188e-06	2.68647e-06	0.000220946	0.499925	2234.36	0.999714	5e-05	5e-05
23101	1747_5	Whole body fat-free mass	Hair colour (natural	413158	6456	XMR (dt unmodeled1)	2627	0.0002	0.00216901	0.91744	5.19704e-06	8.16001e-06	7.89772e-06	0.00026056	0.621297	2295.36	0.873756	5e-05	5e-05
23102	1747_5	Whole body water mass	Hair colour (natural	413190	6458	XMR (dt unmodeled1)	2584	0.0111	0.020148	0.58101	6.91375e-06	1.0681e-05	9.64495e-06	0.000294207	0.579231	1893.09	0.732621	5e-05	5e-05
23105	1747_5	Basal metabolic rate	Hair colour (natural	413178	6458	XMR (dt unmodeled1)	2581	-0.0072	0.0187705	0.7028	5.66424e-06	8.93573e-06	7.96391e-06	0.000285919	0.596331	2016.9	0.781442	5e-05	5e-05
23106	1747_5	Impedance of whole body	Hair colour (natural	413153	6458	XMR (dt unmodeled1)	2284	-0.0001	0.00163745	0.94546	7.33119e-06	4.68566e-06	5.37184e-06	0.000231654	0.547786	2281.68	0.998986	5e-05	5e-05
23109	1747_5	Impedance of arm (right)	Hair colour (natural	413141	6458	XMR (dt unmodeled1)	2244	0.0033	0.0163286	0.83771	5.50587e-06	4.83621e-06	4.53953e-06	0.000230402	0.52026	2200.54	0.980631	5e-05	5e-05
23110	1747_5	Impedance of arm (left)	Hair colour (natural	413157	6458	XMR (dt unmodeled1)	2050	0.0136	0.022155	0.54017	8.96114e-06	4.53692e-06	4.48658e-06	0.000236208	0.495643	2042.15	0.996171	5e-05	5e-05
23113	1747_5	Leg fat-free mass (right)	Hair colour (natural	413147	6458	XMR (dt unmodeled1)	2450	-0.0255	0.0206256	0.2172	5.8411e-06	6.86225e-06	7.11901e-06	0.000252591	0.589261	2242.07	0.915129	5e-05	5e-05
23114	1747_5	Leg predicted mass (right)	Hair colour (natural	413146	6458	XMR (dt unmodeled1)	2490	-0.027	0.0203538	0.18509	6.25787e-06	6.3788e-06	7.19598e-06	0.000247501	0.599728	2319.87	0.931676	5e-05	5e-05
23117	1747_5	Leg fat-free mass (left)	Hair colour (natural	413118	6455	XMR (dt unmodeled1)	2543	-0.0275	0.0214102	0.19953	1.02752e-05	7.3557e-06	6.65069e-06	0.000257299	0.57837	2178.06	0.856493	5e-05	5e-05
23118	1747_5	Leg predicted mass (left)	Hair colour (natural	413113	6455	XMR (dt unmodeled1)	2463	-0.0362	0.0217826	0.096324	8.90621e-06	7.53345e-06	6.83586e-06	0.000258957	0.560769	2094.89	0.850546	5e-05	5e-05
23119	1747_5	Arm fat percentage (right)	Hair colour (natural	413107	6454	XMR (dt unmodeled1)	1833	-0.0312	0.0238274	0.19023	4.79989e-06	3.46106e-06	3.6648e-06	0.000231631	0.434474	1832.49	0.999723	5e-05	5e-05
23120	1747_5	Arm fat mass (right)	Hair colour (natural	413080	6454	XMR (dt unmodeled1)	2017	-0.0084	0.0220048	0.70181	6.93517e-06	3.27362e-06	3.00621e-06	0.000223376	0.457893	2015.76	0.999387	5e-05	5e-05
23121	1747_5	Arm fat-free mass (right)	Hair colour (natural	413074	6454	XMR (dt unmodeled1)	2348	-0.0094	0.0206947	0.64835	6.79077e-06	9.158e-06	9.42219e-06	0.000270405	0.531025	1867.6	0.795401	5e-05	5e-05
23122	1747_5	Arm predicted mass (right)	Hair colour (natural	413067	6454	XMR (dt unmodeled1)	2407	-0.0214	0.0215416	0.32161	8.13935e-06	7.47543e-06	7.15588e-06	0.000248059	0.553012	2145.69	0.891438	5e-05	5e-05
23123	1747_5	Arm fat percentage (left)	Hair colour (natural	413046	6454	XMR (dt unmodeled1)	1844	0	7.04928e-05	0.95072	6.78783e-06	3.17478e-06	3.15537e-06	0.000233574	0.438506	1843.54	0.99975	5e-05	5e-05
23124	1747_5	Arm fat mass (left)	Hair colour (natural	413007	6454	XMR (dt unmodeled1)	2094	-0.0086	0.0218509	0.69421	9.49631e-06	2.97171e-06	2.07522e-06	0.000225164	0.475287	2093.4	0.999713	5e-05	5e-05
23125	1747_5	Arm fat-free mass (left)	Hair colour (natural	412998	6453	XMR (dt unmodeled1)	2368	-0.009	0.0197846	0.65071	4.41742e-06	7.47091e-06	7.1474e-06	0.000262908	0.562124	2061.54	0.870584	5e-05	5e-05
23126	1747_5	Arm predicted mass (left)	Hair colour (natural	412983	6453	XMR (dt unmodeled1)	2388	-0.0041	0.016616	0.80392	4.68493e-06	8.51101e-06	8.63886e-06	0.000274468	0.555556	1935.7	0.810596	5e-05	5e-05
23129	1747_5	Trunk fat-free mass	Hair colour (natural	412844	6451	XMR (dt unmodeled1)	2501	-0.0139	0.0214769	0.51785	1.11066e-05	1.21171e-05	9.88953e-06	0.000302856	0.552593	1760.89	0.704074	5e-05	5e-05
23130	1747_5	Trunk predicted mass	Hair colour (natural	412802	6451	XMR (dt unmodeled1)	2484	-0.0108	0.0207187	0.60198	1.01401e-05	1.17915e-05	1.06124e-05	0.000301384	0.560743	1783.81	0.71812	5e-05	5e-05
30100	1747_5	Mean platelet (thrombocyte) volume	Hair colour (natural	407987	6281	XMR (dt unmodeled1)	1840	-0.0216	0.0235451	0.35807	8.28127e-06	5.79155e-05	4.70809e-05	0.000479679	0.418952	815.864	0.443405	5e-05	5e-05
30300	1747_5	High light scatter reticulocyte count	Hair colour (natural	401345	6108	XMR (dt unmodeled1)	1500	-0.017	0.0288056	0.55476	7.92182e-06	3.09194e-05	1.93964e-05	0.000443538	0.308471	671.67	0.44778	5e-05	5e-05
3062	1747_5	Forced vital capacity (FVC)	Hair colour (natural	383471	5978	XMR (dt unmodeled1)	1551	-0.0202	0.0272549	0.45799	4.72066e-06	9.24059e-06	7.37214e-06	0.000314697	0.345333	1062.38	0.684967	5e-05	5e-05
3063	1747_5	Forced expiratory volume in 1-second (FEV1)	Hair colour (natural	383471	5978	XMR (dt unmodeled1)	1392	0.0228	0.0319979	0.47539	5.20237e-06	1.04891e-05	5.51985e-06	0.000318937	0.268886	829.361	0.595805	5e-05	5e-05
3064	1747_5	Peak expiratory flow (PEF)	Hair colour (natural	383471	5978	XMR (dt unmodeled1)	719	0.0353	0.0569607	0.53587	6.38552e-06	1.41518e-05	1.22258e-05	0.000305979	0.0892828	272.466	0.378951	5e-05	5e-05
50	1747_5	Standing height	Hair colour (natural	419596	6556	XMR (dt unmodeled1)	3350	-0.0021	0.010233	0.83784	1.1199e-05	1.77659e-05	1.45403e-05	0.000328115	0.928076	2732.69	0.815728	5e-05	5e-05
51	1747_5	Seated height	Hair colour (natural	419245	6554	XMR (dt unmodeled1)	2070	0.0185	0.0249595	0.45778	9.62042e-06	2.10337e-05	1.56763e-05	0.000347262	0.421201	1161.38	0.561052	5e-05	5e-05
30600	1727	Albumin	Ease of skin tanning	367192	5759	XMR (dt unmodeled2)	943	-0.0291	0.0505723	0.56482	1.38378e-05	3.97478e-05	4.61186e-05	0.000429136	0.136504	270.677	0.287038	5e-05	2.0173e-05
30870	1727	Triglycerides	Ease of skin tanning	400639	6211	XMR (dt unmodeled2)	1295	0.0211	0.045434	0.64184	1.68238e-05	5.45808e-05	4.37746e-05	0.000491534	0.1645	310.829	0.240022	5e-05	2.13954e-05
30890	1727	Vitamin D	Ease of skin tanning	383324	6046	XMR (dt unmodeled2)	435	-0.07	0.0884533	0.42854	1.38374e-05	7.81677e-05	8.02017e-05	0.000507796	0.0418426	71.4371	0.164223	5e-05	2.2794e-05
20015	1727	Sitting height	Ease of skin tanning	419233	6554	XMR (dt unmodeled2)	2952	-0.0642	0.0260966	0.013839	1.64484e-05	2.59022e-05	1.8031e-05	0.000431428	0.584542	1310.71	0.444008	5e-05	1.53028e-05
21002	1727	Weight	Ease of skin tanning	419316	6558	XMR (dt unmodeled2)	2435	0.0143	0.0241049	0.55413	7.5652e-06	1.5964e-06	2.32841e-06	0.000229101	0.564968	2434.48	0.999787	5e-05	1.80123e-05
23098	1727	Weight	Ease of skin tanning	413194	6458	XMR (dt unmodeled2)	2331	0.0193	0.0249095	0.43918	9.25653e-06	1.69111e-06	2.48347e-06	0.000234762	0.554977	2330.46	0.999767	5e-05	1.8417e-05
23099	1727	Body fat percentage	Ease of skin tanning	412960	6455	XMR (dt unmodeled2)	1917	0.06	0.0290228	0.038708	9.73542e-06	5.25101e-07	2.05871e-06	0.000225285	0.438937	1916.68	0.999832	5e-05	1.86239e-05
23100	1727	Whole body fat mass	Ease of skin tanning	412524	6450	XMR (dt unmodeled2)	2235	0.0704	0.0275052	0.010531	1.01159e-05	5.51103e-07	1.59426e-06	0.000220533	0.49725	2234.63	0.999836	5e-05	1.93406e-05
23101	1727	Whole body fat-free mass	Ease of skin tanning	413158	6456	XMR (dt unmodeled2)	2627	-0.0167	0.0268375	0.5328	1.32978e-05	1.24067e-05	1.29456e-05	0.000362885	0.502424	1313.16	0.499872	5e-05	1.70204e-05
23102	1727	Whole body water mass	Ease of skin tanning	413190	6458	XMR (dt unmodeled2)	2584	-0.0177	0.0286241	0.53714	1.84274e-05	1.64807e-05	1.57523e-05	0.000395807	0.455274	1091.14	0.422269	5e-05	1.73229e-05
23105	1727	Basal metabolic rate	Ease of skin tanning	413178	6458	XMR (dt unmodeled2)	2581	0.0013	0.00870202	0.87922	1.44777e-05	1.3995e-05	1.26763e-05	0.000397518	0.469972	1133.98	0.439355	5e-05	1.695e-05
23106	1727	Impedance of whole body	Ease of skin tanning	413153	6458	XMR (dt unmodeled2)	2284	-0.0231	0.0252372	0.36053	9.61155e-06	1.66121e-06	3.6834e-06	0.000231201	0.545282	2283.49	0.999778	5e-05	1.72215e-05
23109	1727	Impedance of arm (right)	Ease of skin tanning	413141	6458	XMR (dt unmodeled2)	2244	0.0829	0.0261827	0.0015388	5.61456e-06	1.68678e-06	2.87036e-06	0.000226522	0.518857	2243.46	0.999759	5e-05	1.71108e-05
23110	1727	Impedance of arm (left)	Ease of skin tanning	413157	6458	XMR (dt unmodeled2)	2050	0.0571	0.027212	0.036031	1.23696e-05	1.49915e-06	2.92356e-06	0.000235042	0.493005	2049.55	0.999778	5e-05	1.71562e-05
23113	1727	Leg fat-free mass (right)	Ease of skin tanning	413147	6458	XMR (dt unmodeled2)	2450	-0.0079	0.0246024	0.7476	2.12209e-05	8.98471e-06	1.05072e-05	0.000335375	0.499606	1410.43	0.575686	5e-05	1.76145e-05
23114	1727	Leg predicted mass (right)	Ease of skin tanning	413146	6458	XMR (dt unmodeled2)	2490	-0.0101	0.025066	0.68768	1.82412e-05	7.93288e-06	1.04041e-05	0.000325373	0.517801	1496.41	0.600969	5e-05	1.76023e-05
23117	1727	Leg fat-free mass (left)	Ease of skin tanning	413118	6455	XMR (dt unmodeled2)	2543	-0.0026	0.0154581	0.86424	1.79927e-05	1.0416e-05	1.04493e-05	0.000350189	0.480205	1312.25	0.516024	5e-05	1.8398e-05
23118	1727	Leg predicted mass (left)	Ease of skin tanning	413113	6455	XMR (dt unmodeled2)	2463	0.0002	0.00198756	0.92015	1.47565e-05	1.05054e-05	1.06204e-05	0.000348954	0.46518	1272.95	0.51683	5e-05	1.85298e-05
23119	1727	Arm fat percentage (right)	Ease of skin tanning	413107	6454	XMR (dt unmodeled2)	1833	0.0634	0.0289513	0.028619	9.19135e-06	7.46128e-07	2.40561e-06	0.000231007	0.43225	1832.69	0.999829	5e-05	1.86282e-05
23120	1727	Arm fat mass (right)	Ease of skin tanning	413080	6454	XMR (dt unmodeled2)	2017	0.0567	0.0287325	0.048561	1.23258e-05	7.14355e-07	1.89643e-06	0.000222854	0.455481	2016.64	0.99982	5e-05	1.95555e-05
23121	1727	Arm fat-free mass (right)	Ease of skin tanning	413074	6454	XMR (dt unmodeled2)	2348	-0.0143	0.0290592	0.62263	1.23499e-05	1.43277e-05	1.55518e-05	0.000370705	0.413454	1042.81	0.444127	5e-05	1.74309e-05
23122	1727	Arm predicted mass (right)	Ease of skin tanning	413067	6454	XMR (dt unmodeled2)	2407	-0.0111	0.0273652	0.68385	1.38989e-05	1.10722e-05	1.16595e-05	0.000341834	0.445052	1233.2	0.512338	5e-05	1.75861e-05
23123	1727	Arm fat percentage (left)	Ease of skin tanning	413046	6454	XMR (dt unmodeled2)	1844	0.0742	0.0289518	0.010356	9.75571e-06	5.15845e-07	1.94012e-06	0.000233211	0.436203	1843.7	0.999838	5e-05	1.8485e-05
23124	1727	Arm fat mass (left)	Ease of skin tanning	413007	6454	XMR (dt unmodeled2)	2094	0.0581	0.0284339	0.040937	1.46573e-05	4.71176e-07	1.17914e-06	0.000224831	0.473312	2093.66	0.999836	5e-05	1.95871e-05
23125	1727	Arm fat-free mass (left)	Ease of skin tanning	412998	6453	XMR (dt unmodeled2)	2368	0.0118	0.0268932	0.66022	1.45367e-05	1.04267e-05	1.14408e-05	0.000356832	0.46318	1229.95	0.519404	5e-05	1.73388e-05
23126	1727	Arm predicted mass (left)	Ease of skin tanning	412983	6453	XMR (dt unmodeled2)	2388	-0.0123	0.027625	0.65562	1.59322e-05	1.24929e-05	1.35276e-05	0.000374991	0.446589	1122.95	0.470249	5e-05	1.72076e-05
23129	1727	Trunk fat-free mass	Ease of skin tanning	412844	6451	XMR (dt unmodeled2)	2501	-0.0124	0.0284941	0.66237	2.53387e-05	1.78278e-05	1.54239e-05	0.000398384	0.437737	1049.14	0.419487	5e-05	1.74771e-05
23130	1727	Trunk predicted mass	Ease of skin tanning	412802	6451	XMR (dt unmodeled2)	2484	-0.004	0.0195185	0.83745	2.47003e-05	1.75556e-05	1.68127e-05	0.000397875	0.443451	1054.12	0.424365	5e-05	1.70557e-05
30100	1727	Mean platelet (thrombocyte) volume	Ease of skin tanning	407987	6281	XMR (dt unmodeled2)	1840	0.0724	0.0302838	0.016813	1.57059e-05	6.79184e-05	5.72156e-05	0.000529764	0.374351	654.02	0.355446	5e-05	1.83683e-05
30300	1727	High light scatter reticulocyte count	Ease of skin tanning	401345	6108	XMR (dt unmodeled2)	1500	0.0152	0.0376951	0.68723	2.44406e-05	4.1779e-05	2.79921e-05	0.000519639	0.245582	452.638	0.301759	5e-05	1.82293e-05
3062	1727	Forced vital capacity (FVC)	Ease of skin tanning	383471	5978	XMR (dt unmodeled2)	1551	-0.0636	0.0421709	0.13159	3.37909e-05	1.41924e-05	1.35073e-05	0.000417891	0.258239	584.997	0.377174	5e-05	1.82083e-05
3063	1727	Forced expiratory volume in 1-second (FEV1)	Ease of skin tanning	383471	5978	XMR (dt unmodeled2)	1392	-0.0536	0.0524888	0.30754	3.07263e-05	1.97317e-05	1.30315e-05	0.000435514	0.174461	387.284	0.278222	5e-05	1.90994e-05
3064	1727	Peak expiratory flow (PEF)	Ease of skin tanning	383471	5978	XMR (dt unmodeled2)	719	-0.2313	0.0866745	0.0076216	1.36153e-05	2.39094e-05	2.04653e-05	0.000376455	0.0550719	135.056	0.187839	5e-05	2.23702e-05
50	1727	Standing height	Ease of skin tanning	419596	6556	XMR (dt unmodeled2)	3350	-0.0582	0.0215236	0.0068165	2.13631e-05	2.19121e-05	1.90321e-05	0.000398273	0.822601	1979.74	0.590967	5e-05	1.46224e-05
51	1727	Seated height	Ease of skin tanning	419245	6554	XMR (dt unmodeled2)	2070	-0.0529	0.0341487	0.12164	1.38258e-05	2.95387e-05	2.36942e-05	0.000421909	0.331689	742.905	0.358891	5e-05	1.67521e-05
30600	1747_5	Albumin	Hair colour (natural	367192	5759	XMR (dt unmodeled2)	943	0.0658	0.04392	0.13402	1.14643e-05	3.96528e-05	4.57797e-05	0.000429754	0.136992	271.615	0.288032	5e-05	2.0173e-05
30870	1747_5	Triglycerides	Hair colour (natural	400639	6211	XMR (dt unmodeled2)	1295	0.0171	0.0384168	0.65576	1.88832e-05	5.45088e-05	4.36572e-05	0.00049204	0.164817	311.172	0.240287	5e-05	2.13954e-05
30890	1747_5	Vitamin D	Hair colour (natural	383324	6046	XMR (dt unmodeled2)	435	-0.0104	0.0707372	0.88329	2.55548e-05	7.84844e-05	8.11084e-05	0.000502397	0.041408	71.2169	0.163717	5e-05	2.2794e-05
20015	1747_5	Sitting height	Hair colour (natural	419233	6554	XMR (dt unmodeled2)	2952	-0.0017	0.010053	0.86294	1.68321e-05	2.59598e-05	1.8095e-05	0.000431809	0.583365	1306.85	0.4427	5e-05	1.53028e-05
21002	1747_5	Weight	Hair colour (natural	419316	6558	XMR (dt unmodeled2)	2435	0.0078	0.0197222	0.69265	9.58402e-06	1.63208e-06	2.34364e-06	0.000229154	0.565048	2434.47	0.999782	5e-05	1.80123e-05
23098	1747_5	Weight	Hair colour (natural	413194	6458	XMR (dt unmodeled2)	2331	0.0212	0.0211154	0.31553	5.6131e-06	1.69064e-06	2.48928e-06	0.000234837	0.555064	2330.46	0.99977	5e-05	1.8417e-05
23099	1747_5	Body fat percentage	Hair colour (natural	412960	6455	XMR (dt unmodeled2)	1917	-0.0151	0.0232861	0.51802	3.39502e-06	5.00355e-07	2.04867e-06	0.000225513	0.439194	1916.68	0.999833	5e-05	1.86239e-05
23100	1747_5	Whole body fat mass	Hair colour (natural	412524	6450	XMR (dt unmodeled2)	2235	0.004	0.0172772	0.8175	7.92828e-06	5.58672e-07	1.59871e-06	0.000220635	0.497352	2234.63	0.999836	5e-05	1.93406e-05
23101	1747_5	Whole body fat-free mass	Hair colour (natural	413158	6456	XMR (dt unmodeled2)	2627	-0.0092	0.0214341	0.66647	7.61198e-06	1.223e-05	1.28204e-05	0.000361109	0.504553	1325.09	0.504412	5e-05	1.70204e-05
23102	1747_5	Whole body water mass	Hair colour (natural	413190	6458	XMR (dt unmodeled2)	2584	0.0042	0.0177505	0.81436	8.75043e-06	1.63035e-05	1.56656e-05	0.000394419	0.457028	1099	0.425311	5e-05	1.73229e-05
23105	1747_5	Basal metabolic rate	Hair colour (natural	413178	6458	XMR (dt unmodeled2)	2581	-0.0179	0.0236398	0.44875	8.38717e-06	1.38207e-05	1.25611e-05	0.000395382	0.471511	1143.5	0.443045	5e-05	1.695e-05
23106	1747_5	Impedance of whole body	Hair colour (natural	413153	6458	XMR (dt unmodeled2)	2284	-0.0001	0.00129161	0.94475	7.32667e-06	1.67083e-06	3.68141e-06	0.000231168	0.545184	2283.49	0.999777	5e-05	1.72215e-05
23109	1747_5	Impedance of arm (right)	Hair colour (natural	413141	6458	XMR (dt unmodeled2)	2244	0.0032	0.0159673	0.84339	5.53069e-06	1.69124e-06	2.89448e-06	0.000226431	0.518797	2243.44	0.99975	5e-05	1.71108e-05
23110	1747_5	Impedance of arm (left)	Hair colour (natural	413157	6458	XMR (dt unmodeled2)	2050	0.0129	0.0221329	0.56025	8.9348e-06	1.50921e-06	2.94923e-06	0.000234923	0.492922	2049.54	0.999775	5e-05	1.71562e-05
23113	1747_5	Leg fat-free mass (right)	Hair colour (natural	413147	6458	XMR (dt unmodeled2)	2450	-0.0261	0.0235691	0.26753	1.02806e-05	9.3321e-06	1.09064e-05	0.000339888	0.494413	1375.24	0.561322	5e-05	1.76145e-05
23114	1747_5	Leg predicted mass (right)	Hair colour (natural	413146	6458	XMR (dt unmodeled2)	2490	-0.0257	0.0224206	0.25203	9.24648e-06	8.19943e-06	1.07206e-05	0.000329143	0.513464	1465.23	0.588444	5e-05	1.76023e-05
23117	1747_5	Leg fat-free mass (left)	Hair colour (natural	413118	6455	XMR (dt unmodeled2)	2543	-0.0373	0.0249404	0.1347	1.60003e-05	1.05297e-05	1.05982e-05	0.000350976	0.478368	1303	0.512389	5e-05	1.8398e-05
23118	1747_5	Leg predicted mass (left)	Hair colour (natural	413113	6455	XMR (dt unmodeled2)	2463	-0.0457	0.0251352	0.068787	1.43448e-05	1.06607e-05	1.07943e-05	0.000350263	0.462992	1261.23	0.51207	5e-05	1.85298e-05
23119	1747_5	Arm fat percentage (right)	Hair colour (natural	413107	6454	XMR (dt unmodeled2)	1833	-0.0314	0.023956	0.18999	4.24044e-06	7.27227e-07	2.38483e-06	0.000231346	0.432617	1832.69	0.999829	5e-05	1.86282e-05
23120	1747_5	Arm fat mass (right)	Hair colour (natural	413080	6454	XMR (dt unmodeled2)	2017	-0.0078	0.0217302	0.72112	6.087e-06	7.03613e-07	1.89191e-06	0.000223036	0.455681	2016.64	0.999822	5e-05	1.95555e-05
23121	1747_5	Arm fat-free mass (right)	Hair colour (natural	413074	6454	XMR (dt unmodeled2)	2348	-0.0148	0.0251462	0.55735	8.85734e-06	1.42035e-05	1.54537e-05	0.000369605	0.414613	1048.69	0.446632	5e-05	1.74309e-05
23122	1747_5	Arm predicted mass (right)	Hair colour (natural	413067	6454	XMR (dt unmodeled2)	2407	-0.0309	0.0258205	0.23216	1.34225e-05	1.12126e-05	1.18113e-05	0.000343516	0.443327	1221.66	0.507546	5e-05	1.75861e-05
23123	1747_5	Arm fat percentage (left)	Hair colour (natural	413046	6454	XMR (dt unmodeled2)	1844	0.0004	0.00403096	0.91234	5.36768e-06	5.10799e-07	1.93187e-06	0.000233397	0.436378	1843.7	0.999837	5e-05	1.8485e-05
23124	1747_5	Arm fat mass (left)	Hair colour (natural	413007	6454	XMR (dt unmodeled2)	2094	-0.0083	0.0216691	0.70235	7.60299e-06	4.71568e-07	1.18383e-06	0.000224904	0.473373	2093.66	0.999837	5e-05	1.95871e-05
23125	1747_5	Arm fat-free mass (left)	Hair colour (natural	412998	6453	XMR (dt unmodeled2)	2368	-0.0224	0.023963	0.35033	6.73799e-06	1.04424e-05	1.14719e-05	0.0003573	0.462592	1226.27	0.517851	5e-05	1.73388e-05
23126	1747_5	Arm predicted mass (left)	Hair colour (natural	412983	6453	XMR (dt unmodeled2)	2388	-0.0175	0.0241928	0.47041	7.47204e-06	1.2441e-05	1.34846e-05	0.000374576	0.447093	1125.3	0.47123	5e-05	1.72076e-05
23129	1747_5	Trunk fat-free mass	Hair colour (natural	412844	6451	XMR (dt unmodeled2)	2501	-0.0232	0.0256391	0.36562	1.55955e-05	1.77184e-05	1.53635e-05	0.000397677	0.438434	1052.57	0.420859	5e-05	1.74771e-05
23130	1747_5	Trunk predicted mass	Hair colour (natural	412802	6451	XMR (dt unmodeled2)	2484	-0.0197	0.0250836	0.43216	1.44049e-05	1.75364e-05	1.68431e-05	0.000397647	0.443055	1053.36	0.424058	5e-05	1.70557e-05
30100	1747_5	Mean platelet (thrombocyte) volume	Hair colour (natural	407987	6281	XMR (dt unmodeled2)	1840	-0.0243	0.0247589	0.32598	8.99385e-06	6.78541e-05	5.71247e-05	0.000529728	0.374418	654.321	0.355609	5e-05	1.83683e-05
30300	1747_5	High light scatter reticulocyte count	Hair colour (natural	401345	6108	XMR (dt unmodeled2)	1500	-0.023	0.0319117	0.47059	7.98165e-06	4.15629e-05	2.78443e-05	0.00051947	0.246398	454.377	0.302918	5e-05	1.82293e-05
3062	1747_5	Forced vital capacity (FVC)	Hair colour (natural	383471	5978	XMR (dt unmodeled2)	1551	-0.0171	0.0324508	0.59743	8.08348e-06	1.43366e-05	1.38155e-05	0.000420412	0.257017	578.345	0.372886	5e-05	1.82083e-05
3063	1747_5	Forced expiratory volume in 1-second (FEV1)	Hair colour (natural	383471	5978	XMR (dt unmodeled2)	1392	0.0168	0.0390222	0.66619	6.87596e-06	1.93523e-05	1.27738e-05	0.000434886	0.176234	392.178	0.281737	5e-05	1.90994e-05
3064	1747_5	Peak expiratory flow (PEF)	Hair colour (natural	383471	5978	XMR (dt unmodeled2)	719	0.0266	0.0708427	0.70755	1.06539e-05	2.36976e-05	1.97695e-05	0.000379955	0.0555762	135.708	0.188745	5e-05	2.23702e-05
50	1747_5	Standing height	Hair colour (natural	419596	6556	XMR (dt unmodeled2)	3350	-0.0037	0.0135859	0.78357	1.36953e-05	2.17774e-05	1.89366e-05	0.000397207	0.823042	1985.99	0.592832	5e-05	1.46224e-05
51	1747_5	Seated height	Hair colour (natural	419245	6554	XMR (dt unmodeled2)	2070	0.0142	0.0281133	0.61225	1.48434e-05	2.95714e-05	2.38065e-05	0.000422433	0.331673	741.848	0.358381	5e-05	1.67521e-05

## Sheet: Table S10-nc CSA results 1
Table S10	Results of negative control study in Central/South Asians across 15 methods under three IV selection thresholds (5e-5, 5e-6, 5e-7)
column description:
exposure: phecode of the exposure
outcome: phecode of the outcome
exposure_name: description of the exposure
outcome_name: description of the outcome
exp_N1: sample size of the exposure trait in the auxiliary population
exp_N2: sample size of the exposure trait in the target population
Threshold: IV selection threshold
For each of the following MR methods, its results are recorded in these columns:
method list: XMR, MRAPSS, Egger, Weighted-mode, IVW, Weighted-median, CAUSE (5e-5), MRMix, MR-Robust, MR-PRESSO, MR-Lasso, IVW_fe, cML-MA, ConMix, dIVW
nIV_method: number of IVs used in the corresponding method
beta_method: causal effect estimate by the corresponding method
beta.se_method: standard error of the causal effect estimate by the corresponding method
beta.pvalue_method: p-value of the causal effect estimate by the corresponding method
Unique columns:
Threshold_modified_XMR: modified threshold used in XMR fitting algorithm
nvalid_XMR: number of valid IVs detected by XMR
nvalid_MRAPSS: number of valid IVs detected by MRAPSS
CL_ConMix: The lower limit of the 95% confidence interval from ConMix
CU_ConMix: The upper limit of the 95% confidence interval from ConMix
exposure	outcome	exposure_name	outcome_name	exp_N1	exp_N2	Threshold	Threshold_modified_XMR	nIV_XMR	nvalid_XMR	beta_XMR	beta.se_XMR	beta.pvalue_XMR	nIV_MRAPSS	nvalid_MRAPSS	beta_MRAPSS	beta.se_MRAPSS	beta.pvalue_MRAPSS	nIV_Egger	beta_Egger	beta.se_Egger	beta.pvalue_Egger	nIV_Weighted-mode	beta_Weighted-mode	beta.se_Weighted-mode	beta.pvalue_Weighted-mode	nIV_IVW	beta_IVW	beta.se_IVW	beta.pvalue_IVW	nIV_Weighted-median	beta_Weighted-median	beta.se_Weighted-median	beta.pvalue_Weighted-median	nIV_CAUSE (5e-5)	beta_CAUSE (5e-5)	beta.se_CAUSE (5e-5)	beta.pvalue_CAUSE (5e-5)	nIV_MRMix	beta_MRMix	beta.se_MRMix	beta.pvalue_MRMix	nIV_MR-Robust	beta_MR-Robust	beta.se_MR-Robust	beta.pvalue_MR-Robust	nIV_MR-PRESSO	beta_MR-PRESSO	beta.se_MR-PRESSO	beta.pvalue_MR-PRESSO
50	1727	Standing height	Ease of skin tanning	419596	8657	5e-07	3.0042e-09	1995	446.132	-0.025	0.028696	0.38345	NA	NA	NA	NA	NA	NA	NA	NA	NA	NA	NA	NA	NA	NA	NA	NA	NA	NA	NA	NA	NA	NA	NA	NA	NA	NA	NA	NA	NA	NA	NA	NA	NA	NA	NA	NA	NA
50	1727	Standing height	Ease of skin tanning	419596	8657	5e-06	4.50433e-08	2405	467.611	-0.0247	0.0276095	0.37067	11	10.116	-0.00483624	0.693092	0.99443	11	-1.37447	1.58282	0.407752	11	-0.0815045	0.141813	0.578172	11	-0.0955021	0.0677668	0.158754	11	-0.0920268	0.0917209	0.315699	11	-0.0548048	0.12536	0.858025	11	-0.1	0.0732781	0.172359	11	-0.101139	0.062109	0.103437	11	-0.0955021	0.0617162	0.152796
50	1727	Standing height	Ease of skin tanning	419596	8657	5e-05	7.02459e-07	2983	545.801	-0.0369	0.0268044	0.16851	44	43.9916	-0.0290058	0.137812	0.8333	44	-0.26662	0.579868	0.648036	44	-0.214922	0.12242	0.0862782	44	-0.08438	0.0370324	0.022694	44	-0.113338	0.053434	0.0339145	44	-0.0509567	0.111846	0.904345	44	-0.085	0.0430387	0.0482722	44	-0.090688	0.0395201	0.0217483	44	-0.08438	0.035694	0.0226671
50	1747_5	Standing height	Hair colour (natural	419596	8657	5e-07	3.0042e-09	1995	448.109	-0.027	0.0263774	0.3057	NA	NA	NA	NA	NA	NA	NA	NA	NA	NA	NA	NA	NA	NA	NA	NA	NA	NA	NA	NA	NA	NA	NA	NA	NA	NA	NA	NA	NA	NA	NA	NA	NA	NA	NA	NA	NA
50	1747_5	Standing height	Hair colour (natural	419596	8657	5e-06	4.50433e-08	2405	469.466	-0.0286	0.0252826	0.25828	11	10.9946	-0.354345	0.644084	0.58221	11	0.4417	1.47235	0.770992	11	0.0604727	0.146829	0.689133	11	-0.0284037	0.0630371	0.652287	11	0.00976246	0.0837012	0.90715	11	-0.0171177	0.124185	0.999999	11	-0.03	0.0666306	0.652535	11	-0.0197798	0.0688137	0.773775	11	-0.0284037	0.0536604	0.60813
50	1747_5	Standing height	Hair colour (natural	419596	8657	5e-05	7.02459e-07	2983	551.136	-0.0081	0.0215153	0.70605	44	43.9936	0.124114	0.133255	0.35165	44	-0.398414	0.565273	0.484815	44	0.131876	0.113751	0.252715	44	0.0176169	0.0359083	0.623703	44	0.045032	0.0506834	0.374274	44	0.0763854	0.108698	0.743881	44	0.02	0.0394243	0.611944	44	0.0226489	0.0383587	0.554889	44	0.0176169	0.0359083	0.626197
51	1727	Seated height	Ease of skin tanning	419245	8649	5e-07	3.00347e-09	1014	187.799	-0.0473	0.0444997	0.28752	NA	NA	NA	NA	NA	NA	NA	NA	NA	NA	NA	NA	NA	NA	NA	NA	NA	NA	NA	NA	NA	NA	NA	NA	NA	NA	NA	NA	NA	NA	NA	NA	NA	NA	NA	NA	NA
51	1727	Seated height	Ease of skin tanning	419245	8649	5e-06	4.50332e-08	1321	206.486	-0.0407	0.0411599	0.32229	NA	NA	NA	NA	NA	NA	NA	NA	NA	NA	NA	NA	NA	NA	NA	NA	NA	NA	NA	NA	NA	NA	NA	NA	NA	NA	NA	NA	NA	NA	NA	NA	NA	NA	NA	NA	NA
51	1727	Seated height	Ease of skin tanning	419245	8649	5e-05	7.02315e-07	1851	215.108	-0.0211	0.0374908	0.57424	30	28.9344	-0.170951	0.334883	0.60971	30	-0.417859	0.989	0.675883	30	-0.119094	0.130378	0.368538	30	-0.104501	0.0524898	0.0464942	30	-0.0979617	0.0684949	0.152658	30	4.68028e-15	0.351863	NA	30	-0.16	0.649038	0.805281	30	-0.105198	0.0522521	0.0440845	30	-0.104501	0.0524898	0.0559911
51	1747_5	Seated height	Hair colour (natural	419245	8649	5e-07	3.00347e-09	1014	187.327	0.0168	0.0405084	0.67914	NA	NA	NA	NA	NA	NA	NA	NA	NA	NA	NA	NA	NA	NA	NA	NA	NA	NA	NA	NA	NA	NA	NA	NA	NA	NA	NA	NA	NA	NA	NA	NA	NA	NA	NA	NA	NA
51	1747_5	Seated height	Hair colour (natural	419245	8649	5e-06	4.50332e-08	1321	205.829	0.0223	0.0387154	0.56457	NA	NA	NA	NA	NA	NA	NA	NA	NA	NA	NA	NA	NA	NA	NA	NA	NA	NA	NA	NA	NA	NA	NA	NA	NA	NA	NA	NA	NA	NA	NA	NA	NA	NA	NA	NA	NA
51	1747_5	Seated height	Hair colour (natural	419245	8649	5e-05	7.02315e-07	1851	213.485	0.0202	0.0372704	0.58787	30	29.2213	0.324757	0.296633	0.2736	30	0.046477	0.806375	0.954447	30	-0.0430228	0.123484	0.730052	30	0.0302657	0.0427208	0.478663	30	0.0102192	0.0601767	0.865152	30	0.0604452	0.148527	0.969217	30	0.035	0.0721005	0.627369	30	0.0245944	0.0466346	0.597926	30	0.0302657	0.0427208	0.48432
3062	1727	Forced vital capacity (FVC)	Ease of skin tanning	383471	8080	5e-07	3.18259e-09	640	83.4104	-0.0551	0.067652	0.41563	NA	NA	NA	NA	NA	NA	NA	NA	NA	NA	NA	NA	NA	NA	NA	NA	NA	NA	NA	NA	NA	NA	NA	NA	NA	NA	NA	NA	NA	NA	NA	NA	NA	NA	NA	NA	NA
3062	1727	Forced vital capacity (FVC)	Ease of skin tanning	383471	8080	5e-06	4.75152e-08	904	87.134	-0.0775	0.0670848	0.24777	NA	NA	NA	NA	NA	NA	NA	NA	NA	NA	NA	NA	NA	NA	NA	NA	NA	NA	NA	NA	NA	NA	NA	NA	NA	NA	NA	NA	NA	NA	NA	NA	NA	NA	NA	NA	NA
3062	1727	Forced vital capacity (FVC)	Ease of skin tanning	383471	8080	5e-05	7.3755e-07	1359	100.971	-0.0534	0.0634912	0.39998	28	27.8588	0.0969406	0.661458	0.88348	28	-0.527382	1.00596	0.60454	28	-0.268002	0.156281	0.0978251	28	-0.12469	0.0474676	0.00861791	28	-0.137189	0.0669605	0.0404808	28	0.0159031	0.251534	1	28	-0.13	0.0497657	0.0089951	28	-0.125152	0.0506766	0.0135257	28	-0.12469	0.0474676	0.0140304
3062	1747_5	Forced vital capacity (FVC)	Hair colour (natural	383471	8080	5e-07	3.18259e-09	640	82.4526	0.0848	0.0694099	0.2218	NA	NA	NA	NA	NA	NA	NA	NA	NA	NA	NA	NA	NA	NA	NA	NA	NA	NA	NA	NA	NA	NA	NA	NA	NA	NA	NA	NA	NA	NA	NA	NA	NA	NA	NA	NA	NA
3062	1747_5	Forced vital capacity (FVC)	Hair colour (natural	383471	8080	5e-06	4.75152e-08	904	85.9753	0.0673	0.0675308	0.31874	NA	NA	NA	NA	NA	NA	NA	NA	NA	NA	NA	NA	NA	NA	NA	NA	NA	NA	NA	NA	NA	NA	NA	NA	NA	NA	NA	NA	NA	NA	NA	NA	NA	NA	NA	NA	NA
3062	1747_5	Forced vital capacity (FVC)	Hair colour (natural	383471	8080	5e-05	7.3755e-07	1359	99.6842	0.0763	0.0646283	0.23807	28	1.92062	-4.27371	3.83622	0.26526	28	0.434102	1.04902	0.682401	28	0.0535081	0.118624	0.65554	28	0.00594564	0.0495053	0.904403	28	0.0605188	0.0597649	0.311244	28	-0.0347577	0.446673	0.938848	28	0.03	0.0598498	0.616192	28	0.0560378	0.0580151	0.334085	28	0.00594564	0.0495053	0.905292
3063	1727	Forced expiratory volume in 1-second (FEV1)	Ease of skin tanning	383471	8080	5e-07	3.18259e-09	542	76.2059	-0.1278	0.070204	0.068667	NA	NA	NA	NA	NA	NA	NA	NA	NA	NA	NA	NA	NA	NA	NA	NA	NA	NA	NA	NA	NA	NA	NA	NA	NA	NA	NA	NA	NA	NA	NA	NA	NA	NA	NA	NA	NA
3063	1727	Forced expiratory volume in 1-second (FEV1)	Ease of skin tanning	383471	8080	5e-06	4.75152e-08	794	76.8791	-0.1559	0.0702466	0.026429	7	6.99919	-1.01607	0.601582	0.091221	7	0.543245	2.15252	0.810797	7	-0.270719	0.156782	0.134964	7	-0.297811	0.082133	0.00028789	7	-0.295396	0.112011	0.00835906	7	-0.0535943	0.244937	0.0212012	7	-0.31	0.0886097	0.000467903	7	-0.297485	0.0599038	6.83307e-07	7	-0.297811	0.0550212	0.00164413
3063	1727	Forced expiratory volume in 1-second (FEV1)	Ease of skin tanning	383471	8080	5e-05	7.3755e-07	1268	91.1171	-0.1503	0.0676982	0.026388	28	27.9946	-0.143249	0.194488	0.4614	28	-1.54323	0.687537	0.0335254	28	-0.21719	0.132222	0.112058	28	-0.142429	0.0450287	0.00156113	28	-0.144135	0.0658306	0.0285618	28	-0.0108347	0.248528	0.997204	28	-0.15	0.0524294	0.00422322	28	-0.14703	0.046606	0.00160643	28	-0.142429	0.044289	0.00336271
3063	1747_5	Forced expiratory volume in 1-second (FEV1)	Hair colour (natural	383471	8080	5e-07	3.18259e-09	542	76.6375	0.0621	0.0722835	0.38995	NA	NA	NA	NA	NA	NA	NA	NA	NA	NA	NA	NA	NA	NA	NA	NA	NA	NA	NA	NA	NA	NA	NA	NA	NA	NA	NA	NA	NA	NA	NA	NA	NA	NA	NA	NA	NA
3063	1747_5	Forced expiratory volume in 1-second (FEV1)	Hair colour (natural	383471	8080	5e-06	4.75152e-08	794	77.9092	0.0705	0.0743653	0.34328	7	0.000918766	-0.141086	21.6222	0.99479	7	1.10667	2.00228	0.604264	7	0.0438976	0.144107	0.770947	7	-0.0480911	0.0764006	0.529048	7	-0.00819064	0.0950913	0.93136	7	-0.00794166	0.148382	0.983629	7	-0.055	0.0776437	0.478719	7	-0.042075	0.074361	0.571516	7	-0.0480911	0.0536836	0.404851
3063	1747_5	Forced expiratory volume in 1-second (FEV1)	Hair colour (natural	383471	8080	5e-05	7.3755e-07	1268	92.4156	0.12	0.0702861	0.087884	28	27.9934	-0.0936516	0.168567	0.5785	28	0.545399	0.685665	0.433565	28	0.0772082	0.118547	0.520365	28	-0.0331681	0.0446686	0.457761	28	0.0489139	0.0610615	0.423097	28	-0.0579032	0.24888	0.561149	28	0.14	0.136459	0.304915	28	-0.0261518	0.0491197	0.594443	28	-0.0331681	0.0446686	0.464173
3064	1727	Peak expiratory flow (PEF)	Ease of skin tanning	383471	8080	5e-07	3.18259e-09	228	11.5345	-0.1752	0.201361	0.38423	NA	NA	NA	NA	NA	NA	NA	NA	NA	NA	NA	NA	NA	NA	NA	NA	NA	NA	NA	NA	NA	NA	NA	NA	NA	NA	NA	NA	NA	NA	NA	NA	NA	NA	NA	NA	NA
3064	1727	Peak expiratory flow (PEF)	Ease of skin tanning	383471	8080	5e-06	4.75152e-08	355	18.7149	-0.2065	0.175459	0.23932	9	8.99866	-0.0577743	0.262187	0.82559	9	0.963934	1.70976	0.590497	9	0.0210679	0.160232	0.89864	9	-0.113784	0.0712275	0.110159	9	-0.0296372	0.0929456	0.749828	9	2.24994e-15	0.186505	0.158655	9	-0.12	0.0734979	0.102532	9	-0.112654	0.0612412	0.0658394	9	-0.113784	0.0584665	0.0875118
3064	1727	Peak expiratory flow (PEF)	Ease of skin tanning	383471	8080	5e-05	7.3755e-07	666	27.4813	-0.2279	0.14995	0.1285	34	33.9909	-0.181652	0.121363	0.13445	34	0.170209	0.561126	0.763598	34	-0.251938	0.126477	0.0547036	34	-0.143496	0.0403985	0.000382292	34	-0.175649	0.0585067	0.00268031	34	5.81479e-15	0.32053	NA	34	-0.15	0.0445009	0.000749722	34	-0.144752	0.0403717	0.000336453	34	-0.143496	0.0383628	0.000698269
3064	1747_5	Peak expiratory flow (PEF)	Hair colour (natural	383471	8080	5e-07	3.18259e-09	228	11.5773	-0.041	0.13215	0.7564	NA	NA	NA	NA	NA	NA	NA	NA	NA	NA	NA	NA	NA	NA	NA	NA	NA	NA	NA	NA	NA	NA	NA	NA	NA	NA	NA	NA	NA	NA	NA	NA	NA	NA	NA	NA	NA
3064	1747_5	Peak expiratory flow (PEF)	Hair colour (natural	383471	8080	5e-06	4.75152e-08	355	18.7479	-0.0421	0.154118	0.78493	9	8.99859	-0.107308	0.220461	0.62644	9	-2.22653	1.59043	0.204254	9	-0.10942	0.140442	0.458339	9	-0.0649723	0.0662562	0.326779	9	-0.09369	0.0873033	0.283202	9	-0.055962	0.118011	0.605401	9	-0.065	0.0667719	0.330323	9	-0.0629933	0.055023	0.252269	9	-0.0649723	0.0438557	0.176751
3064	1747_5	Peak expiratory flow (PEF)	Hair colour (natural	383471	8080	5e-05	7.3755e-07	666	27.8256	-0.0446	0.145955	0.7598	34	33.9514	-0.0465454	0.100315	0.64265	34	-0.454942	0.521962	0.38992	34	-0.0606836	0.110806	0.587612	34	-0.0331299	0.0375789	0.377988	34	-0.0182658	0.050177	0.715837	34	-0.0878544	0.191539	0.956003	34	-0.04	0.0460122	0.384664	34	-0.0239067	0.0365108	0.512606	34	-0.0331299	0.0344392	0.343056
20015	1727	Sitting height	Ease of skin tanning	419233	8649	5e-07	3.00371e-09	1578	318.358	-0.0257	0.0348155	0.46124	NA	NA	NA	NA	NA	NA	NA	NA	NA	NA	NA	NA	NA	NA	NA	NA	NA	NA	NA	NA	NA	NA	NA	NA	NA	NA	NA	NA	NA	NA	NA	NA	NA	NA	NA	NA	NA
20015	1727	Sitting height	Ease of skin tanning	419233	8649	5e-06	4.50365e-08	1981	352.819	-0.0358	0.0335872	0.28619	4	3.99954	0.0358133	0.202749	0.85979	4	-1.6531	1.80209	0.455812	4	0.0393049	0.192927	0.851602	4	-0.00965908	0.107395	0.928335	4	0.00742049	0.127747	0.953679	4	0.0092967	0.0944373	0.971663	4	-0.01	0.108136	0.926319	4	-0.00753241	0.0852246	0.929572	4	-0.00965908	0.0812438	0.912877
20015	1727	Sitting height	Ease of skin tanning	419233	8649	5e-05	7.02362e-07	2620	388.188	-0.0486	0.0318451	0.12689	42	41.9844	0.304584	0.241573	0.20737	42	-0.224537	0.612071	0.715666	42	-0.010472	0.112315	0.926169	42	-0.0304291	0.0385996	0.430505	42	-0.0342747	0.0556352	0.537854	42	0.0956052	0.132258	0.775367	42	-0.025	0.145688	0.863753	42	-0.0411774	0.0440746	0.350166	42	-0.0304291	0.0385996	0.43504
20015	1747_5	Sitting height	Hair colour (natural	419233	8649	5e-07	3.00371e-09	1578	318.167	0.0056	0.0266861	0.83315	NA	NA	NA	NA	NA	NA	NA	NA	NA	NA	NA	NA	NA	NA	NA	NA	NA	NA	NA	NA	NA	NA	NA	NA	NA	NA	NA	NA	NA	NA	NA	NA	NA	NA	NA	NA	NA
20015	1747_5	Sitting height	Hair colour (natural	419233	8649	5e-06	4.50365e-08	1981	353.562	0.0017	0.0132432	0.89817	4	3.99939	0.131883	0.192999	0.4944	4	0.310049	1.92829	0.887032	4	-0.0134242	0.17542	0.943818	4	0.0476332	0.099899	0.633495	4	-0.00103115	0.116693	0.99295	4	0.0454624	0.14049	0.980702	4	0.055	0.107415	0.608628	4	0.0318415	0.135057	0.813616	4	0.0476332	0.0942628	0.648119
20015	1747_5	Sitting height	Hair colour (natural	419233	8649	5e-05	7.02362e-07	2620	388.505	-0.0099	0.02641	0.70699	42	14.7599	0.154482	0.257185	0.54806	42	-0.112327	0.563098	0.842898	42	-0.0308253	0.116612	0.792841	42	-0.014804	0.0358749	0.679859	42	-0.00922708	0.0521996	0.859693	42	0.00750311	0.112872	1	42	-0.01	0.0514077	0.845766	42	-0.0196259	0.0377481	0.603121	42	-0.014804	0.0354798	0.678671
21002	1727	Weight	Ease of skin tanning	419316	8771	5e-07	3.11979e-09	1081	92.2374	0.027	0.0638267	0.67232	NA	NA	NA	NA	NA	NA	NA	NA	NA	NA	NA	NA	NA	NA	NA	NA	NA	NA	NA	NA	NA	NA	NA	NA	NA	NA	NA	NA	NA	NA	NA	NA	NA	NA	NA	NA	NA
21002	1727	Weight	Ease of skin tanning	419316	8771	5e-06	4.66463e-08	1492	112.627	0.0163	0.0524994	0.75608	5	4.99854	-5.00503	7.9086	0.52683	5	7.55452	8.79474	0.45351	5	-0.189842	0.186236	0.365667	5	-0.126588	0.109993	0.249786	5	-0.199849	0.136039	0.141818	5	-0.0291516	0.186388	0.477885	5	-0.12	0.183397	0.512907	5	-0.186039	0.194073	0.337759	5	-0.126588	0.109993	0.313903
21002	1727	Weight	Ease of skin tanning	419316	8771	5e-05	7.25233e-07	2143	145.221	0.0198	0.0525211	0.7068	37	36.9951	0.0701936	0.754935	0.92592	37	-0.64949	1.00223	0.521184	37	-0.144712	0.154096	0.353937	37	-0.0110771	0.0486965	0.820056	37	-0.0375042	0.0622437	0.546816	37	0.00701125	0.303569	1	37	2.00936e-17	0.0663554	1	37	-0.0136417	0.0515836	0.791426	37	-0.0110771	0.0486965	0.821343
21002	1747_5	Weight	Hair colour (natural	419316	8771	5e-07	3.11979e-09	1081	90.9852	0.0621	0.0605627	0.30492	NA	NA	NA	NA	NA	NA	NA	NA	NA	NA	NA	NA	NA	NA	NA	NA	NA	NA	NA	NA	NA	NA	NA	NA	NA	NA	NA	NA	NA	NA	NA	NA	NA	NA	NA	NA	NA
21002	1747_5	Weight	Hair colour (natural	419316	8771	5e-06	4.66463e-08	1492	109.488	0.0342	0.0564745	0.54493	5	4.99944	-1.05232	1.91224	0.58211	5	-3.86641	7.453	0.639758	5	-0.164941	0.158594	0.357063	5	-0.102656	0.0961042	0.28544	5	-0.115364	0.122097	0.344733	5	-0.00792124	0.102958	0.691846	5	-0.11	0.0951984	0.247893	5	-0.103272	0.0660515	0.117932	5	-0.102656	0.0436679	0.0784432
21002	1747_5	Weight	Hair colour (natural	419316	8771	5e-05	7.25233e-07	2143	142.286	0.0328	0.0466986	0.48209	37	36.8485	-0.505554	0.466276	0.27826	37	-0.83692	0.787402	0.295112	37	-0.00428996	0.115118	0.970479	37	-0.0410348	0.0385776	0.287468	37	-0.0137543	0.0534123	0.796784	37	-0.0549987	0.233485	0.966708	37	-0.04	0.0445077	0.368802	37	-0.0449865	0.0379118	0.235381	37	-0.0410348	0.0366248	0.269959
23098	1727	Weight	Ease of skin tanning	413194	8658	5e-07	3.13467e-09	1031	93.1087	0.0393	0.0693196	0.57095	NA	NA	NA	NA	NA	NA	NA	NA	NA	NA	NA	NA	NA	NA	NA	NA	NA	NA	NA	NA	NA	NA	NA	NA	NA	NA	NA	NA	NA	NA	NA	NA	NA	NA	NA	NA	NA
23098	1727	Weight	Ease of skin tanning	413194	8658	5e-06	4.68523e-08	1463	115.156	0.0046	0.0282968	0.87163	NA	NA	NA	NA	NA	NA	NA	NA	NA	NA	NA	NA	NA	NA	NA	NA	NA	NA	NA	NA	NA	NA	NA	NA	NA	NA	NA	NA	NA	NA	NA	NA	NA	NA	NA	NA	NA
23098	1727	Weight	Ease of skin tanning	413194	8658	5e-05	7.28155e-07	2052	147.174	0.0017	0.0117914	0.88583	34	33.9937	-0.22678	0.571251	0.69138	34	-0.0202928	1.11055	0.985535	34	-0.181145	0.141276	0.208707	34	-0.0369549	0.0507016	0.466081	34	-0.101332	0.0638201	0.112338	34	-0.0652932	0.306781	0.807759	34	-0.21	0.176026	0.232866	34	-0.046254	0.0568559	0.415914	34	-0.0369549	0.0507016	0.471223
23098	1747_5	Weight	Hair colour (natural	413194	8658	5e-07	3.13467e-09	1031	91.5129	0.0665	0.0565424	0.23938	NA	NA	NA	NA	NA	NA	NA	NA	NA	NA	NA	NA	NA	NA	NA	NA	NA	NA	NA	NA	NA	NA	NA	NA	NA	NA	NA	NA	NA	NA	NA	NA	NA	NA	NA	NA	NA
23098	1747_5	Weight	Hair colour (natural	413194	8658	5e-06	4.68523e-08	1463	111.747	0.0444	0.0507187	0.38139	NA	NA	NA	NA	NA	NA	NA	NA	NA	NA	NA	NA	NA	NA	NA	NA	NA	NA	NA	NA	NA	NA	NA	NA	NA	NA	NA	NA	NA	NA	NA	NA	NA	NA	NA	NA	NA
23098	1747_5	Weight	Hair colour (natural	413194	8658	5e-05	7.28155e-07	2052	143.11	0.0316	0.048073	0.51135	34	33.6469	-0.369459	0.362616	0.30826	34	-0.976289	0.86058	0.265031	34	-0.00536586	0.109902	0.961354	34	-0.0388943	0.0398984	0.329643	34	-0.0148324	0.0568912	0.794312	34	-0.0437886	0.224623	0.992677	34	-0.04	0.0477504	0.402205	34	-0.0463627	0.0414935	0.263845	34	-0.0388943	0.0379371	0.312711
23099	1727	Body fat percentage	Ease of skin tanning	412960	8654	5e-07	3.13556e-09	778	52.1673	0.1739	0.09369	0.063473	NA	NA	NA	NA	NA	NA	NA	NA	NA	NA	NA	NA	NA	NA	NA	NA	NA	NA	NA	NA	NA	NA	NA	NA	NA	NA	NA	NA	NA	NA	NA	NA	NA	NA	NA	NA	NA
23099	1727	Body fat percentage	Ease of skin tanning	412960	8654	5e-06	4.68646e-08	1122	68.319	0.1613	0.0794185	0.042293	5	4.99809	6.97579	17.3523	0.68768	5	4.50374	3.79595	0.320839	5	0.136795	0.196896	0.525451	5	0.0589759	0.120228	0.623755	5	0.056435	0.137094	0.680594	5	0.00647255	0.187049	0.711748	5	0.17	0.318252	0.593225	5	0.0714218	0.121421	0.556387	5	0.0589759	0.120228	0.649447
23099	1727	Body fat percentage	Ease of skin tanning	412960	8654	5e-05	7.28331e-07	1677	88.9912	0.155	0.0725019	0.032558	31	30.6821	-0.0898371	0.352663	0.79892	31	1.42066	0.921181	0.133864	31	0.0846344	0.123564	0.49864	31	0.00307749	0.0481714	0.949061	31	0.0327734	0.0636777	0.606779	31	-0.0135434	0.304943	0.990099	31	0.09	0.248048	0.71673	31	0.0106743	0.0491877	0.8282	31	0.00307749	0.0481714	0.949485
23099	1747_5	Body fat percentage	Hair colour (natural	412960	8654	5e-07	3.13556e-09	778	51.9152	-0.0421	0.0907906	0.64257	NA	NA	NA	NA	NA	NA	NA	NA	NA	NA	NA	NA	NA	NA	NA	NA	NA	NA	NA	NA	NA	NA	NA	NA	NA	NA	NA	NA	NA	NA	NA	NA	NA	NA	NA	NA	NA
23099	1747_5	Body fat percentage	Hair colour (natural	412960	8654	5e-06	4.68646e-08	1122	68.039	-0.0952	0.0806855	0.23793	5	3.06424	-4.73795	2.87447	0.099294	5	5.34992	5.38488	0.393696	5	-0.0913785	0.153552	0.58381	5	-0.337239	0.165487	0.0415648	5	-0.128485	0.134075	0.337908	5	-0.403478	0.403607	0.0625008	5	-0.11	0.240437	0.647311	5	-0.320425	0.202509	0.113587	5	-0.337239	0.165487	0.111215
23099	1747_5	Body fat percentage	Hair colour (natural	412960	8654	5e-05	7.28331e-07	1677	86.8582	-0.1071	0.0715592	0.1344	31	2.91509	-1.08293	0.579914	0.061845	31	-1.17077	0.870661	0.189147	31	-0.0676229	0.116778	0.566865	31	-0.122018	0.0448573	0.00652569	31	-0.108521	0.0584492	0.0633582	31	-0.414092	0.356601	0.0968651	31	-0.11	0.106844	0.303225	31	-0.0918033	0.0425756	0.0310648	31	-0.122018	0.0448573	0.0107499
23100	1727	Whole body fat mass	Ease of skin tanning	412524	8645	5e-07	3.1357e-09	923	57.317	0.1777	0.0829677	0.032254	NA	NA	NA	NA	NA	NA	NA	NA	NA	NA	NA	NA	NA	NA	NA	NA	NA	NA	NA	NA	NA	NA	NA	NA	NA	NA	NA	NA	NA	NA	NA	NA	NA	NA	NA	NA	NA
23100	1727	Whole body fat mass	Ease of skin tanning	412524	8645	5e-06	4.68665e-08	1376	66.0809	0.1077	0.0760685	0.15665	4	3.99913	-2.35915	2.83006	0.4045	4	1.153	8.91386	0.908917	4	0.126367	0.279824	0.682211	4	-0.117378	0.185576	0.527054	4	-0.0693309	0.145308	0.63327	4	-0.0317812	0.268318	0.348926	4	0.25	0.166537	0.133313	4	-0.116965	0.168887	0.488585	4	-0.117378	0.185576	0.571973
23100	1727	Whole body fat mass	Ease of skin tanning	412524	8645	5e-05	7.28357e-07	2006	88.305	0.078	0.0639166	0.22233	23	22.9955	0.391912	1.07415	0.71522	23	-1.41178	1.16441	0.238805	23	0.115308	0.165732	0.493873	23	0.0348574	0.06838	0.610219	23	0.106889	0.079009	0.176095	23	0.0523107	0.320217	0.650972	23	2.00936e-17	0.0973766	1	23	0.0375554	0.0733598	0.608697	23	0.0348574	0.06838	0.615295
23100	1747_5	Whole body fat mass	Hair colour (natural	412524	8645	5e-07	3.1357e-09	923	56.4532	0.0241	0.0518832	0.64198	NA	NA	NA	NA	NA	NA	NA	NA	NA	NA	NA	NA	NA	NA	NA	NA	NA	NA	NA	NA	NA	NA	NA	NA	NA	NA	NA	NA	NA	NA	NA	NA	NA	NA	NA	NA	NA
23100	1747_5	Whole body fat mass	Hair colour (natural	412524	8645	5e-06	4.68665e-08	1376	66.2613	0.0295	0.0531277	0.57899	4	3.99955	-0.704189	0.571163	0.21761	4	5.4077	4.08943	0.317012	4	-0.0323069	0.169769	0.861224	4	-0.151321	0.103745	0.144681	4	-0.102731	0.126436	0.416496	4	-0.0161481	0.175343	0.421068	4	-0.16	0.107099	0.13519	4	-0.150443	0.0774958	0.0522214	4	-0.151321	0.0839549	0.169272
23100	1747_5	Whole body fat mass	Hair colour (natural	412524	8645	5e-05	7.28357e-07	2006	88.3097	-0.0141	0.0606408	0.81673	23	5.55307	-0.27264	0.468903	0.56094	23	-0.503764	0.833104	0.551868	23	0.0733925	0.130497	0.579525	23	-0.0520501	0.0483251	0.281444	23	-0.0127136	0.0687676	0.853325	23	-0.018608	0.195901	0.905855	23	-0.055	0.0514604	0.285168	23	-0.048653	0.0485795	0.316578	23	-0.0520501	0.0441617	0.251138
23101	1727	Whole body fat-free mass	Ease of skin tanning	413158	8658	5e-07	3.13542e-09	1312	172.42	0.0849	0.0529396	0.10888	NA	NA	NA	NA	NA	NA	NA	NA	NA	NA	NA	NA	NA	NA	NA	NA	NA	NA	NA	NA	NA	NA	NA	NA	NA	NA	NA	NA	NA	NA	NA	NA	NA	NA	NA	NA	NA
23101	1727	Whole body fat-free mass	Ease of skin tanning	413158	8658	5e-06	4.68626e-08	1702	190.996	0.0769	0.0507155	0.12942	6	5.99935	0.251159	0.340818	0.46117	6	-2.48487	2.21954	0.325592	6	-0.0826127	0.172797	0.652757	6	0.0415675	0.0905461	0.646179	6	-0.0215122	0.115047	0.851672	6	0.0261208	0.16274	0.944391	6	0.045	0.095235	0.636559	6	0.0311349	0.130845	0.811918	6	0.0415675	0.0839496	0.641485
23101	1727	Whole body fat-free mass	Ease of skin tanning	413158	8658	5e-05	7.28302e-07	2315	210.722	0.0861	0.0482038	0.074218	32	31.9938	0.146126	0.158791	0.35745	32	-0.029177	0.686634	0.966387	32	-0.0253461	0.136366	0.853759	32	0.0131348	0.0436201	0.763324	32	-0.00204292	0.060778	0.973186	32	0.0438605	0.15883	0.933128	32	0.01	0.0462054	0.828657	32	0.0112608	0.0414647	0.785949	32	0.0131348	0.0387598	0.736987
23101	1747_5	Whole body fat-free mass	Hair colour (natural	413158	8658	5e-07	3.13542e-09	1312	174.138	0.0264	0.0452154	0.55988	NA	NA	NA	NA	NA	NA	NA	NA	NA	NA	NA	NA	NA	NA	NA	NA	NA	NA	NA	NA	NA	NA	NA	NA	NA	NA	NA	NA	NA	NA	NA	NA	NA	NA	NA	NA	NA
23101	1747_5	Whole body fat-free mass	Hair colour (natural	413158	8658	5e-06	4.68626e-08	1702	190.649	0.0251	0.0424815	0.55533	6	5.99932	-0.24446	0.295984	0.40885	6	-1.33689	2.06463	0.552581	6	-0.101636	0.154651	0.540096	6	-0.05161	0.0842265	0.54004	6	-0.0678708	0.103756	0.513024	6	-0.0204529	0.12901	0.960763	6	-0.05	0.0874184	0.567348	6	-0.0556092	0.0690188	0.42041	6	-0.05161	0.0721606	0.506476
23101	1747_5	Whole body fat-free mass	Hair colour (natural	413158	8658	5e-05	7.28302e-07	2315	208.192	0.0038	0.018519	0.83624	32	31.9931	-0.132235	0.149146	0.37529	32	0.103772	0.655627	0.875297	32	-0.0026087	0.11336	0.981788	32	-0.0231088	0.0409986	0.572994	32	-0.0111214	0.0572649	0.846012	32	-0.0577464	0.204097	0.986745	32	-0.03	0.213729	0.888372	32	-0.0166912	0.0413435	0.686419	32	-0.0231088	0.0409986	0.577049
23102	1727	Whole body water mass	Ease of skin tanning	413190	8658	5e-07	3.13475e-09	1293	174.018	0.0788	0.0529381	0.13678	NA	NA	NA	NA	NA	NA	NA	NA	NA	NA	NA	NA	NA	NA	NA	NA	NA	NA	NA	NA	NA	NA	NA	NA	NA	NA	NA	NA	NA	NA	NA	NA	NA	NA	NA	NA	NA
23102	1727	Whole body water mass	Ease of skin tanning	413190	8658	5e-06	4.68534e-08	1679	193.757	0.0633	0.0504192	0.20899	5	4.99945	0.210707	0.276239	0.4456	5	-3.87646	2.92411	0.27685	5	-0.0981698	0.197676	0.645511	5	0.0553426	0.100095	0.580333	5	-0.0235832	0.131078	0.857218	5	0.0320464	0.163214	0.862176	5	0.06	0.103674	0.562768	5	0.052907	0.0966326	0.584031	5	0.0553426	0.100095	0.609777
23102	1727	Whole body water mass	Ease of skin tanning	413190	8658	5e-05	7.28171e-07	2269	215.297	0.0838	0.0482168	0.082079	32	31.9939	0.185585	0.167295	0.26729	32	0.0124087	0.681735	0.985598	32	-0.0409381	0.128871	0.752868	32	0.0194997	0.0436964	0.655413	32	0.00159027	0.0620149	0.979542	32	0.0737164	0.171486	0.813835	32	0.02	0.0465289	0.667312	32	0.0197459	0.041408	0.633461	32	0.0194997	0.0394445	0.624539
23102	1747_5	Whole body water mass	Hair colour (natural	413190	8658	5e-07	3.13475e-09	1293	176.203	0.0509	0.0448722	0.25692	NA	NA	NA	NA	NA	NA	NA	NA	NA	NA	NA	NA	NA	NA	NA	NA	NA	NA	NA	NA	NA	NA	NA	NA	NA	NA	NA	NA	NA	NA	NA	NA	NA	NA	NA	NA	NA
23102	1747_5	Whole body water mass	Hair colour (natural	413190	8658	5e-06	4.68534e-08	1679	193.846	0.0326	0.0421835	0.43998	5	4.99946	-0.24908	0.234026	0.28718	5	0.537516	2.72003	0.855979	5	-0.123194	0.145289	0.444239	5	-0.103492	0.091148	0.256198	5	-0.105912	0.118947	0.373246	5	-0.0368373	0.128692	0.446608	5	-0.11	0.0916393	0.23	5	-0.103803	0.0621049	0.0946399	5	-0.103492	0.0559481	0.138025
23102	1747_5	Whole body water mass	Hair colour (natural	413190	8658	5e-05	7.28171e-07	2269	211.778	0.0212	0.0362651	0.55906	32	31.9935	-0.114361	0.166555	0.49232	32	-0.160374	0.65604	0.80854	32	-0.00723182	0.11709	0.951148	32	-0.0147299	0.0413998	0.721993	32	-0.011142	0.0578372	0.847237	32	-0.0370121	0.212767	0.99997	32	-0.02	0.194895	0.918265	32	-0.00666243	0.0423726	0.87506	32	-0.0147299	0.0413998	0.724403
23105	1727	Basal metabolic rate	Ease of skin tanning	413178	8658	5e-07	3.135e-09	1228	160.833	0.0422	0.0538145	0.43339	NA	NA	NA	NA	NA	NA	NA	NA	NA	NA	NA	NA	NA	NA	NA	NA	NA	NA	NA	NA	NA	NA	NA	NA	NA	NA	NA	NA	NA	NA	NA	NA	NA	NA	NA	NA	NA
23105	1727	Basal metabolic rate	Ease of skin tanning	413178	8658	5e-06	4.68568e-08	1664	175.194	0.0501	0.0532061	0.34608	7	6.99911	0.255727	0.409516	0.53232	7	-0.38563	1.82259	0.840786	7	-0.100797	0.167561	0.569487	7	0.0164071	0.0842448	0.845585	7	-0.0351286	0.113747	0.757449	7	0.0160686	0.162257	0.990432	7	0.02	0.0901109	0.824354	7	-0.00887582	0.171199	0.958652	7	0.0164071	0.0765562	0.8374
23105	1727	Basal metabolic rate	Ease of skin tanning	413178	8658	5e-05	7.2822e-07	2278	212.392	0.0645	0.0503388	0.2004	36	35.871	0.023168	0.224484	0.9178	36	0.103651	0.712712	0.885229	36	-0.0564402	0.13063	0.668346	36	-0.0148274	0.0449662	0.741592	36	-0.0214436	0.0594992	0.718547	36	0.0115185	0.264891	1	36	0.08	0.174832	0.647253	36	-0.00870872	0.0443185	0.844216	36	-0.0148274	0.0449662	0.743558
23105	1747_5	Basal metabolic rate	Hair colour (natural	413178	8658	5e-07	3.135e-09	1228	160.535	0.0421	0.0448123	0.34727	NA	NA	NA	NA	NA	NA	NA	NA	NA	NA	NA	NA	NA	NA	NA	NA	NA	NA	NA	NA	NA	NA	NA	NA	NA	NA	NA	NA	NA	NA	NA	NA	NA	NA	NA	NA	NA
23105	1747_5	Basal metabolic rate	Hair colour (natural	413178	8658	5e-06	4.68568e-08	1664	174.16	0.0455	0.0425787	0.28548	7	6.99896	-0.176028	0.358247	0.62317	7	-2.57719	1.69539	0.188956	7	-0.0991266	0.168218	0.577176	7	-0.00699643	0.078365	0.928859	7	-0.0362845	0.108435	0.737912	7	-0.00351914	0.148568	1	7	-0.01	0.0840378	0.90528	7	-0.00999249	0.0774578	0.897353	7	-0.00699643	0.078113	0.931545
23105	1747_5	Basal metabolic rate	Hair colour (natural	413178	8658	5e-05	7.2822e-07	2278	210.519	0.0263	0.039473	0.50599	36	22.6615	-0.0261686	0.190065	0.89049	36	-0.370696	0.601199	0.54161	36	-0.00671343	0.114758	0.953682	36	0.000434131	0.0384687	0.990996	36	-0.0131573	0.0547756	0.810172	36	0.0260141	0.190236	0.999178	36	0.005	0.0449407	0.911412	36	-0.00208587	0.0390033	0.95735	36	0.000434131	0.0373596	0.990795
23106	1727	Impedance of whole body	Ease of skin tanning	413153	8654	5e-07	3.13156e-09	1044	128.393	-0.0775	0.0571692	0.17496	NA	NA	NA	NA	NA	NA	NA	NA	NA	NA	NA	NA	NA	NA	NA	NA	NA	NA	NA	NA	NA	NA	NA	NA	NA	NA	NA	NA	NA	NA	NA	NA	NA	NA	NA	NA	NA
23106	1727	Impedance of whole body	Ease of skin tanning	413153	8654	5e-06	4.68093e-08	1431	149.833	-0.0781	0.0546829	0.1533	6	5.99922	-0.0808485	0.207872	0.69732	6	-0.908372	2.45024	0.729638	6	0.0324359	0.157296	0.844761	6	-0.0496467	0.0890129	0.577018	6	-0.0258617	0.111671	0.816858	6	-0.00186639	0.113965	0.946825	6	-0.05	0.0878219	0.569129	6	-0.047407	0.0710026	0.504338	6	-0.0496467	0.048275	0.350911
23106	1727	Impedance of whole body	Ease of skin tanning	413153	8654	5e-05	7.27545e-07	2007	181.338	-0.0747	0.0513688	0.1458	32	3.6666	-0.0752966	0.20971	0.71956	32	-0.321747	0.628184	0.612271	32	-0.0434533	0.112584	0.70216	32	-0.0269755	0.0436181	0.536281	32	-0.0482001	0.0577039	0.403549	32	-0.00127451	0.272566	1	32	-0.025	0.0479021	0.601741	32	-0.0348682	0.0409583	0.394597	32	-0.0269755	0.0362929	0.462913
23106	1747_5	Impedance of whole body	Hair colour (natural	413153	8654	5e-07	3.13156e-09	1044	128.568	-0.0718	0.0513725	0.16231	NA	NA	NA	NA	NA	NA	NA	NA	NA	NA	NA	NA	NA	NA	NA	NA	NA	NA	NA	NA	NA	NA	NA	NA	NA	NA	NA	NA	NA	NA	NA	NA	NA	NA	NA	NA	NA
23106	1747_5	Impedance of whole body	Hair colour (natural	413153	8654	5e-06	4.68093e-08	1431	150.165	-0.0682	0.0506818	0.17825	6	5.9993	0.28139	0.200439	0.16036	6	-3.41799	2.27923	0.208091	6	0.00598721	0.153593	0.970414	6	0.119868	0.0828003	0.147707	6	0.0378445	0.108735	0.727807	6	0.0336225	0.202143	0.204032	6	0.125	0.0879481	0.155232	6	0.114558	0.085707	0.181347	6	0.119868	0.0780282	0.185085
23106	1747_5	Impedance of whole body	Hair colour (natural	413153	8654	5e-05	7.27545e-07	2007	180.807	-0.0646	0.0442643	0.14451	32	5.51241	0.212888	0.245092	0.38506	32	0.487129	0.58434	0.411072	32	0.00834928	0.112303	0.941213	32	0.0279542	0.0405738	0.49084	32	0.0090026	0.0589347	0.878591	32	0.065884	0.191999	0.697818	32	0.03	0.0462602	0.516658	32	0.025699	0.0419611	0.540241	32	0.0279542	0.0402484	0.492515
23109	1727	Impedance of arm (right)	Ease of skin tanning	413141	8658	5e-07	3.13577e-09	1026	108.04	0.0248	0.0516224	0.63149	NA	NA	NA	NA	NA	NA	NA	NA	NA	NA	NA	NA	NA	NA	NA	NA	NA	NA	NA	NA	NA	NA	NA	NA	NA	NA	NA	NA	NA	NA	NA	NA	NA	NA	NA	NA	NA
23109	1727	Impedance of arm (right)	Ease of skin tanning	413141	8658	5e-06	4.68675e-08	1369	136.003	0.0351	0.0484997	0.46891	5	1.28027	0.143707	0.352787	0.68375	5	0.0542415	1.71367	0.976737	5	0.175515	0.188817	0.405221	5	0.0476318	0.0992456	0.631271	5	0.0853109	0.132885	0.52088	5	0.00720423	0.135455	0.883491	5	0.05	0.102771	0.626599	5	0.0493523	0.0883245	0.576325	5	0.0476318	0.0944992	0.640727
23109	1727	Impedance of arm (right)	Ease of skin tanning	413141	8658	5e-05	7.28371e-07	1967	173.673	0.0177	0.0344575	0.6084	19	18.9955	-0.0535058	0.166634	0.74814	19	0.944175	0.762615	0.232514	19	0.128393	0.142549	0.379646	19	-0.0428862	0.0561931	0.445348	19	0.0386987	0.0798294	0.627842	19	-0.0249091	0.290888	0.82109	19	-0.05	0.0769401	0.515785	19	-0.0366219	0.0584533	0.530977	19	-0.0428862	0.0559135	0.453019
23109	1747_5	Impedance of arm (right)	Hair colour (natural	413141	8658	5e-07	3.13577e-09	1026	108.183	-0.0888	0.0578026	0.12451	NA	NA	NA	NA	NA	NA	NA	NA	NA	NA	NA	NA	NA	NA	NA	NA	NA	NA	NA	NA	NA	NA	NA	NA	NA	NA	NA	NA	NA	NA	NA	NA	NA	NA	NA	NA	NA
23109	1747_5	Impedance of arm (right)	Hair colour (natural	413141	8658	5e-06	4.68675e-08	1369	135.776	-0.0658	0.0509073	0.19592	5	1.07349	0.111845	0.295852	0.7054	5	0.687091	1.44984	0.667921	5	0.0806558	0.149936	0.619157	5	0.0135012	0.0923188	0.883728	5	0.0445704	0.116493	0.702015	5	0.00441861	0.0781373	0.94523	5	0.01	0.0910805	0.912574	5	0.0162072	0.0812999	0.841989	5	0.0135012	0.0523262	0.809123
23109	1747_5	Impedance of arm (right)	Hair colour (natural	413141	8658	5e-05	7.28371e-07	1967	171.917	-0.0592	0.0466392	0.20416	19	18.9954	0.0245659	0.155988	0.87486	19	0.552054	0.712236	0.448928	19	0.0246874	0.126648	0.847632	19	-0.0281093	0.0522712	0.590743	19	-0.00618733	0.0723556	0.931854	19	0.00651717	0.240736	0.924304	19	-0.03	0.0588824	0.610409	19	-0.0275173	0.0514968	0.593099	19	-0.0281093	0.0519934	0.595389
23110	1727	Impedance of arm (left)	Ease of skin tanning	413157	8658	5e-07	3.13544e-09	927	115.17	-0.0186	0.0565039	0.74171	NA	NA	NA	NA	NA	NA	NA	NA	NA	NA	NA	NA	NA	NA	NA	NA	NA	NA	NA	NA	NA	NA	NA	NA	NA	NA	NA	NA	NA	NA	NA	NA	NA	NA	NA	NA	NA
23110	1727	Impedance of arm (left)	Ease of skin tanning	413157	8658	5e-06	4.68629e-08	1292	150.634	-0.0143	0.0496134	0.77325	NA	NA	NA	NA	NA	NA	NA	NA	NA	NA	NA	NA	NA	NA	NA	NA	NA	NA	NA	NA	NA	NA	NA	NA	NA	NA	NA	NA	NA	NA	NA	NA	NA	NA	NA	NA	NA
23110	1727	Impedance of arm (left)	Ease of skin tanning	413157	8658	5e-05	7.28306e-07	1822	192.549	-0.0031	0.0242012	0.89702	22	0.00286985	-0.106316	14.3541	0.99409	22	-0.311683	1.07512	0.774874	22	0.0622148	0.140405	0.662218	22	-0.0447987	0.0534327	0.401799	22	-0.0133879	0.0737047	0.855864	22	-0.017559	0.255737	0.989262	22	-0.05	0.0600717	0.405218	22	-0.045843	0.0522111	0.379927	22	-0.0447987	0.051665	0.395688
23110	1747_5	Impedance of arm (left)	Hair colour (natural	413157	8658	5e-07	3.13544e-09	927	114.373	-0.1167	0.0578221	0.04349	NA	NA	NA	NA	NA	NA	NA	NA	NA	NA	NA	NA	NA	NA	NA	NA	NA	NA	NA	NA	NA	NA	NA	NA	NA	NA	NA	NA	NA	NA	NA	NA	NA	NA	NA	NA	NA
23110	1747_5	Impedance of arm (left)	Hair colour (natural	413157	8658	5e-06	4.68629e-08	1292	149.236	-0.1175	0.0472498	0.012857	NA	NA	NA	NA	NA	NA	NA	NA	NA	NA	NA	NA	NA	NA	NA	NA	NA	NA	NA	NA	NA	NA	NA	NA	NA	NA	NA	NA	NA	NA	NA	NA	NA	NA	NA	NA	NA
23110	1747_5	Impedance of arm (left)	Hair colour (natural	413157	8658	5e-05	7.28306e-07	1822	190.622	-0.1088	0.0434439	0.012239	22	1.0542	0.35083	0.908883	0.6995	22	1.34462	1.00009	0.193838	22	-0.0165108	0.127243	0.897993	22	0.0203444	0.0497034	0.682307	22	0.000149925	0.0669851	0.998214	22	0.0173278	0.199362	0.85337	22	0.025	0.0516041	0.628061	22	0.00913646	0.051554	0.859335	22	0.0203444	0.0339094	0.55495
23113	1727	Leg fat-free mass (right)	Ease of skin tanning	413147	8658	5e-07	3.13564e-09	1161	148.405	0.0899	0.0547274	0.10048	NA	NA	NA	NA	NA	NA	NA	NA	NA	NA	NA	NA	NA	NA	NA	NA	NA	NA	NA	NA	NA	NA	NA	NA	NA	NA	NA	NA	NA	NA	NA	NA	NA	NA	NA	NA	NA
23113	1727	Leg fat-free mass (right)	Ease of skin tanning	413147	8658	5e-06	4.68657e-08	1570	161.743	0.0903	0.0544605	0.097166	7	6.99897	0.289055	0.36009	0.42213	7	-0.927854	2.04283	0.668721	7	-0.123873	0.190818	0.540268	7	0.0519016	0.0957538	0.587797	7	-0.0222692	0.121308	0.854346	7	-2.40866e-15	0.179096	NA	7	2.00936e-17	0.229388	1	7	0.0509128	0.0942757	0.589168	7	0.0519016	0.0957538	0.607324
23113	1727	Leg fat-free mass (right)	Ease of skin tanning	413147	8658	5e-05	7.28346e-07	2200	198.287	0.0899	0.050765	0.076472	35	22.4854	-0.0675446	0.222593	0.76155	35	0.0246397	0.646186	0.969813	35	-0.0607767	0.130935	0.645481	35	-0.014604	0.0445802	0.743222	35	-0.0263171	0.0592956	0.657167	35	4.00721e-15	0.36562	0.924425	35	0.03	0.20998	0.886392	35	-0.00722551	0.0438615	0.869153	35	-0.014604	0.0445802	0.74523
23113	1747_5	Leg fat-free mass (right)	Hair colour (natural	413147	8658	5e-07	3.13564e-09	1161	146.8	0.0089	0.0371488	0.81059	NA	NA	NA	NA	NA	NA	NA	NA	NA	NA	NA	NA	NA	NA	NA	NA	NA	NA	NA	NA	NA	NA	NA	NA	NA	NA	NA	NA	NA	NA	NA	NA	NA	NA	NA	NA	NA
23113	1747_5	Leg fat-free mass (right)	Hair colour (natural	413147	8658	5e-06	4.68657e-08	1570	158.933	0.0233	0.0401283	0.56173	7	6.99852	-0.260654	0.255769	0.30816	7	-0.937512	1.54455	0.57037	7	-0.142897	0.143224	0.356939	7	-0.0819131	0.0775403	0.290788	7	-0.113462	0.100718	0.259941	7	-0.0391408	0.123895	0.505065	7	-0.085	0.0778344	0.274806	7	-0.0833321	0.0593414	0.160235	7	-0.0819131	0.0500109	0.152555
23113	1747_5	Leg fat-free mass (right)	Hair colour (natural	413147	8658	5e-05	7.28346e-07	2200	193.739	-0.0002	0.00230849	0.94257	35	16.0541	-0.117145	0.178821	0.51241	35	-0.511257	0.556508	0.364926	35	-0.0513925	0.109031	0.640396	35	-0.0185824	0.0389685	0.633465	35	-0.0154445	0.0548276	0.77818	35	-0.0491258	0.22146	0.989855	35	-0.02	0.0444214	0.652542	35	-0.0227815	0.0417935	0.585687	35	-0.0185824	0.0366835	0.615733
23114	1727	Leg predicted mass (right)	Ease of skin tanning	413146	8658	5e-07	3.13567e-09	1167	155.62	0.0894	0.0557006	0.10853	NA	NA	NA	NA	NA	NA	NA	NA	NA	NA	NA	NA	NA	NA	NA	NA	NA	NA	NA	NA	NA	NA	NA	NA	NA	NA	NA	NA	NA	NA	NA	NA	NA	NA	NA	NA	NA
23114	1727	Leg predicted mass (right)	Ease of skin tanning	413146	8658	5e-06	4.6866e-08	1582	166.982	0.0958	0.0546625	0.07973	7	6.99899	0.231723	0.301964	0.44285	7	-1.30121	2.03615	0.55091	7	-0.1222	0.193622	0.551229	7	0.0508822	0.0954618	0.594026	7	-0.0235337	0.118075	0.842019	7	2.83714e-15	0.178123	NA	7	2.00936e-17	0.22619	1	7	0.0498379	0.0938224	0.595284	7	0.0508822	0.0954618	0.613181
23114	1727	Leg predicted mass (right)	Ease of skin tanning	413146	8658	5e-05	7.2835e-07	2230	208.659	0.0876	0.0504581	0.082697	37	36.5403	-0.0690194	0.182638	0.7055	37	-0.0483077	0.638988	0.940168	37	-0.0918157	0.115091	0.430238	37	-0.0153898	0.0441084	0.727157	37	-0.0314567	0.0582119	0.588933	37	-1.57513e-15	0.356977	0.924253	37	0.05	0.0738056	0.498117	37	-0.0129136	0.0446583	0.772455	37	-0.0153898	0.0441084	0.72919
23114	1747_5	Leg predicted mass (right)	Hair colour (natural	413146	8658	5e-07	3.13567e-09	1167	153.722	0.0163	0.0429436	0.70405	NA	NA	NA	NA	NA	NA	NA	NA	NA	NA	NA	NA	NA	NA	NA	NA	NA	NA	NA	NA	NA	NA	NA	NA	NA	NA	NA	NA	NA	NA	NA	NA	NA	NA	NA	NA	NA
23114	1747_5	Leg predicted mass (right)	Hair colour (natural	413146	8658	5e-06	4.6866e-08	1582	163.413	0.0161	0.0355463	0.65075	7	6.99878	-0.230088	0.225674	0.30794	7	-0.568539	1.56911	0.731914	7	-0.138634	0.149827	0.390512	7	-0.0806283	0.0772443	0.296574	7	-0.111093	0.0986113	0.259924	7	-0.0368753	0.125828	0.519177	7	-0.085	0.0776932	0.273934	7	-0.0819307	0.0585755	0.161897	7	-0.0806283	0.0500831	0.158547
23114	1747_5	Leg predicted mass (right)	Hair colour (natural	413146	8658	5e-05	7.2835e-07	2230	204.737	0.0033	0.0168714	0.84276	37	36.6076	-0.104654	0.150264	0.48614	37	-0.242724	0.540482	0.656136	37	-0.0754275	0.109223	0.494255	37	-0.0268932	0.0378364	0.477224	37	-0.0264132	0.0535297	0.621709	37	-0.0741716	0.203399	0.962498	37	-0.03	0.0432742	0.48815	37	-0.0281613	0.0361628	0.436134	37	-0.0268932	0.0366011	0.467242
23117	1727	Leg fat-free mass (left)	Ease of skin tanning	413118	8658	5e-07	3.13625e-09	1200	135.127	0.0867	0.0585778	0.13899	NA	NA	NA	NA	NA	NA	NA	NA	NA	NA	NA	NA	NA	NA	NA	NA	NA	NA	NA	NA	NA	NA	NA	NA	NA	NA	NA	NA	NA	NA	NA	NA	NA	NA	NA	NA	NA
23117	1727	Leg fat-free mass (left)	Ease of skin tanning	413118	8658	5e-06	4.68741e-08	1610	162.857	0.0828	0.0560745	0.13979	5	4.9989	0.618401	0.85267	0.4683	5	-2.39868	3.19799	0.507685	5	-0.0830181	0.197304	0.695552	5	0.0654529	0.103848	0.528514	5	-0.0041948	0.131411	0.974535	5	0.0295647	0.177047	0.80684	5	0.07	0.106297	0.510196	5	0.0631001	0.0988534	0.523265	5	0.0654529	0.103848	0.562727
23117	1727	Leg fat-free mass (left)	Ease of skin tanning	413118	8658	5e-05	7.28464e-07	2237	200.594	0.0796	0.0523861	0.12868	33	32.9839	0.066624	0.261862	0.79917	33	0.30468	0.875986	0.730331	33	-0.0493024	0.123919	0.693375	33	0.0144628	0.0491627	0.768618	33	0.00821738	0.0641606	0.898089	33	0.0998613	0.279207	0.914617	33	0.1	0.17752	0.573219	33	0.0234413	0.0488815	0.631545	33	0.0144628	0.0491627	0.770518
23117	1747_5	Leg fat-free mass (left)	Hair colour (natural	413118	8658	5e-07	3.13625e-09	1200	133.628	0.0094	0.0379355	0.80415	NA	NA	NA	NA	NA	NA	NA	NA	NA	NA	NA	NA	NA	NA	NA	NA	NA	NA	NA	NA	NA	NA	NA	NA	NA	NA	NA	NA	NA	NA	NA	NA	NA	NA	NA	NA	NA
23117	1747_5	Leg fat-free mass (left)	Hair colour (natural	413118	8658	5e-06	4.68741e-08	1610	159.901	0.0121	0.0353104	0.73158	5	4.99944	-0.374174	0.574124	0.51458	5	-0.118456	2.70348	0.967804	5	-0.142484	0.144159	0.37892	5	-0.0835256	0.0926104	0.367108	5	-0.107805	0.121134	0.373483	5	-0.0111145	0.0977452	0.832805	5	-0.09	0.091801	0.326898	5	-0.0846659	0.06723	0.207905	5	-0.0835256	0.0460899	0.144173
23117	1747_5	Leg fat-free mass (left)	Hair colour (natural	413118	8658	5e-05	7.28464e-07	2237	196.401	-0.0164	0.0403391	0.68401	33	32.9946	-0.114893	0.203427	0.57222	33	-0.466665	0.735773	0.530569	33	-0.00860016	0.109117	0.93767	33	-0.0221811	0.0414631	0.592678	33	-0.0112559	0.0552287	0.838506	33	-0.0402092	0.233877	0.993123	33	-0.02	0.743424	0.978537	33	-0.0227902	0.040899	0.57737	33	-0.0221811	0.0414631	0.596376
23118	1727	Leg predicted mass (left)	Ease of skin tanning	413113	8658	5e-07	3.13635e-09	1141	128.032	0.1066	0.0585302	0.06861	NA	NA	NA	NA	NA	NA	NA	NA	NA	NA	NA	NA	NA	NA	NA	NA	NA	NA	NA	NA	NA	NA	NA	NA	NA	NA	NA	NA	NA	NA	NA	NA	NA	NA	NA	NA	NA
23118	1727	Leg predicted mass (left)	Ease of skin tanning	413113	8658	5e-06	4.68755e-08	1542	149.609	0.0937	0.0554708	0.091251	4	3.99954	0.432699	0.368285	0.24003	4	-4.69141	3.36926	0.298406	4	-0.0117287	0.206632	0.958304	4	0.114667	0.114928	0.318413	4	0.107768	0.130853	0.410177	4	0.0388899	0.176781	0.563035	4	0.12	0.115521	0.298909	4	0.115462	0.104864	0.27087	4	0.114667	0.114928	0.391944
23118	1727	Leg predicted mass (left)	Ease of skin tanning	413113	8658	5e-05	7.28485e-07	2150	188.312	0.1004	0.0521771	0.054444	31	30.9533	-0.0275923	0.238358	0.90784	31	0.632375	0.880998	0.478627	31	-0.0624248	0.13053	0.635946	31	-0.00909085	0.0498955	0.855427	31	-0.0206406	0.0647256	0.749807	31	0.00701008	0.276365	1	31	0.08	0.114814	0.485939	31	-0.00193948	0.0488295	0.968317	31	-0.00909085	0.0498955	0.856653
23118	1747_5	Leg predicted mass (left)	Hair colour (natural	413113	8658	5e-07	3.13635e-09	1141	126.925	-0.0042	0.0344331	0.90329	NA	NA	NA	NA	NA	NA	NA	NA	NA	NA	NA	NA	NA	NA	NA	NA	NA	NA	NA	NA	NA	NA	NA	NA	NA	NA	NA	NA	NA	NA	NA	NA	NA	NA	NA	NA	NA
23118	1747_5	Leg predicted mass (left)	Hair colour (natural	413113	8658	5e-06	4.68755e-08	1542	147.189	-0.0107	0.0435267	0.80597	4	3.9996	-0.292386	0.284702	0.30442	4	1.1639	3.13411	0.746017	4	-0.153171	0.152955	0.39042	4	-0.115271	0.102235	0.259531	4	-0.130378	0.116471	0.262969	4	-0.0124416	0.0981262	0.662024	4	-0.12	0.100897	0.23431	4	-0.118124	0.104066	0.256336	4	-0.115271	0.0401283	0.0639167
23118	1747_5	Leg predicted mass (left)	Hair colour (natural	413113	8658	5e-05	7.28485e-07	2150	185.043	-0.0251	0.0422184	0.55272	31	30.9652	-0.0816411	0.18657	0.66168	31	-0.496259	0.72346	0.498191	31	-0.00837497	0.114802	0.942329	31	-0.0146771	0.0412967	0.722286	31	-0.0112045	0.0588819	0.849084	31	-0.0154858	0.226717	1	31	-0.02	0.0481554	0.677906	31	-0.014893	0.0397714	0.708058	31	-0.0146771	0.0405681	0.720047
23119	1727	Arm fat percentage (right)	Ease of skin tanning	413107	8658	5e-07	3.13647e-09	729	59.7409	0.202	0.0877325	0.021292	NA	NA	NA	NA	NA	NA	NA	NA	NA	NA	NA	NA	NA	NA	NA	NA	NA	NA	NA	NA	NA	NA	NA	NA	NA	NA	NA	NA	NA	NA	NA	NA	NA	NA	NA	NA	NA
23119	1727	Arm fat percentage (right)	Ease of skin tanning	413107	8658	5e-06	4.68772e-08	1064	67.6165	0.2057	0.0822039	0.012335	NA	NA	NA	NA	NA	NA	NA	NA	NA	NA	NA	NA	NA	NA	NA	NA	NA	NA	NA	NA	NA	NA	NA	NA	NA	NA	NA	NA	NA	NA	NA	NA	NA	NA	NA	NA	NA
23119	1727	Arm fat percentage (right)	Ease of skin tanning	413107	8658	5e-05	7.28509e-07	1636	81.0821	0.1614	0.0748235	0.030962	27	26.9266	0.787188	0.64794	0.2244	27	-0.645551	1.11062	0.566273	27	0.189592	0.131879	0.16247	27	0.123762	0.0481778	0.0102032	27	0.128088	0.0695743	0.0656178	27	0.115118	0.290267	0.174459	27	0.13	0.0546901	0.0174527	27	0.13369	0.0529804	0.011623	27	0.123762	0.0432752	0.00824684
23119	1747_5	Arm fat percentage (right)	Hair colour (natural	413107	8658	5e-07	3.13647e-09	729	59.4529	-0.1123	0.0780765	0.15043	NA	NA	NA	NA	NA	NA	NA	NA	NA	NA	NA	NA	NA	NA	NA	NA	NA	NA	NA	NA	NA	NA	NA	NA	NA	NA	NA	NA	NA	NA	NA	NA	NA	NA	NA	NA	NA
23119	1747_5	Arm fat percentage (right)	Hair colour (natural	413107	8658	5e-06	4.68772e-08	1064	66.9323	-0.1197	0.0732489	0.10224	NA	NA	NA	NA	NA	NA	NA	NA	NA	NA	NA	NA	NA	NA	NA	NA	NA	NA	NA	NA	NA	NA	NA	NA	NA	NA	NA	NA	NA	NA	NA	NA	NA	NA	NA	NA	NA
23119	1747_5	Arm fat percentage (right)	Hair colour (natural	413107	8658	5e-05	7.28509e-07	1636	80.8368	-0.0979	0.0642877	0.12798	27	3.57431	-1.59681	1.01135	0.11436	27	-1.25322	1.26604	0.331719	27	-0.0216903	0.122892	0.86127	27	-0.112506	0.0547223	0.0397871	27	-0.0486614	0.0650364	0.454328	27	-0.386979	0.343233	0.186397	27	-0.06	0.0588979	0.308339	27	-0.0867697	0.055922	0.120753	27	-0.112506	0.0547223	0.0499562
23120	1727	Arm fat mass (right)	Ease of skin tanning	413080	8658	5e-07	3.13703e-09	817	48.9579	0.1074	0.0825373	0.19325	NA	NA	NA	NA	NA	NA	NA	NA	NA	NA	NA	NA	NA	NA	NA	NA	NA	NA	NA	NA	NA	NA	NA	NA	NA	NA	NA	NA	NA	NA	NA	NA	NA	NA	NA	NA	NA
23120	1727	Arm fat mass (right)	Ease of skin tanning	413080	8658	5e-06	4.6885e-08	1187	62.3878	0.1207	0.0802841	0.1327	5	4.99944	32.8825	181.559	0.85628	5	5.34484	12.0976	0.688534	5	0.28284	0.274825	0.361562	5	0.0682906	0.164325	0.677715	5	0.113372	0.173483	0.51343	5	-3.27516e-15	0.236417	NA	5	0.4	0.181941	0.0279123	5	0.0702504	0.157591	0.655758	5	0.0682906	0.164325	0.699041
23120	1727	Arm fat mass (right)	Ease of skin tanning	413080	8658	5e-05	7.28619e-07	1800	81.0659	0.1075	0.0748557	0.15099	32	31.9926	4.93187	6.07265	0.41671	32	1.11694	1.13394	0.332498	32	-0.0856961	0.161445	0.599335	32	0.0660931	0.0553983	0.232848	32	0.0075293	0.0666881	0.910107	32	-9.53057e-15	0.385331	NA	32	2.00936e-17	0.0827682	1	32	0.0641108	0.0583709	0.272059	32	0.0660931	0.0553983	0.2419
23120	1747_5	Arm fat mass (right)	Hair colour (natural	413080	8658	5e-07	3.13703e-09	817	48.5722	-0.0124	0.0693061	0.85848	NA	NA	NA	NA	NA	NA	NA	NA	NA	NA	NA	NA	NA	NA	NA	NA	NA	NA	NA	NA	NA	NA	NA	NA	NA	NA	NA	NA	NA	NA	NA	NA	NA	NA	NA	NA	NA
23120	1747_5	Arm fat mass (right)	Hair colour (natural	413080	8658	5e-06	4.6885e-08	1187	61.9402	0.0065	0.0339277	0.84824	5	4.99873	-1.48535	2.54685	0.55975	5	7.7605	6.28121	0.304571	5	-0.00545419	0.157121	0.973972	5	-0.0928277	0.0955349	0.331218	5	-0.0185597	0.124864	0.881838	5	-0.0131533	0.18134	0.997171	5	-0.105	0.0990429	0.289078	5	-0.0548548	0.225063	0.80744	5	-0.0928277	0.0687805	0.248461
23120	1747_5	Arm fat mass (right)	Hair colour (natural	413080	8658	5e-05	7.28619e-07	1800	81.2373	-0.0108	0.0617171	0.86145	32	0.00455699	-0.157849	12.0297	0.98953	32	-0.141434	0.84192	0.867719	32	-0.0102181	0.107309	0.924752	32	-0.0449718	0.0412243	0.275315	32	-0.0231187	0.0590645	0.69549	32	-0.0334266	0.238077	0.976747	32	-0.04	0.0503226	0.426689	32	-0.0573879	0.0417822	0.169597	32	-0.0449718	0.0381907	0.247934
23121	1727	Arm fat-free mass (right)	Ease of skin tanning	413074	8658	5e-07	3.13716e-09	1134	129.049	0.0669	0.0638665	0.29476	NA	NA	NA	NA	NA	NA	NA	NA	NA	NA	NA	NA	NA	NA	NA	NA	NA	NA	NA	NA	NA	NA	NA	NA	NA	NA	NA	NA	NA	NA	NA	NA	NA	NA	NA	NA	NA
23121	1727	Arm fat-free mass (right)	Ease of skin tanning	413074	8658	5e-06	4.68867e-08	1513	157.21	0.0675	0.058003	0.24445	NA	NA	NA	NA	NA	NA	NA	NA	NA	NA	NA	NA	NA	NA	NA	NA	NA	NA	NA	NA	NA	NA	NA	NA	NA	NA	NA	NA	NA	NA	NA	NA	NA	NA	NA	NA	NA
23121	1727	Arm fat-free mass (right)	Ease of skin tanning	413074	8658	5e-05	7.28644e-07	2082	184.331	0.0491	0.0491233	0.31777	28	27.9858	-0.0900886	0.234636	0.70101	28	0.760578	0.913517	0.412663	28	-0.18034	0.15316	0.249288	28	-0.0565616	0.0479709	0.238366	28	-0.134212	0.067926	0.0481708	28	-0.0629376	0.209349	0.889076	28	-0.055	0.188037	0.769908	28	-0.0610564	0.0537724	0.256183	28	-0.0565616	0.0479709	0.248652
23121	1747_5	Arm fat-free mass (right)	Hair colour (natural	413074	8658	5e-07	3.13716e-09	1134	129.078	0.0722	0.0496221	0.14582	NA	NA	NA	NA	NA	NA	NA	NA	NA	NA	NA	NA	NA	NA	NA	NA	NA	NA	NA	NA	NA	NA	NA	NA	NA	NA	NA	NA	NA	NA	NA	NA	NA	NA	NA	NA	NA
23121	1747_5	Arm fat-free mass (right)	Hair colour (natural	413074	8658	5e-06	4.68867e-08	1513	157.84	0.084	0.0457126	0.066144	NA	NA	NA	NA	NA	NA	NA	NA	NA	NA	NA	NA	NA	NA	NA	NA	NA	NA	NA	NA	NA	NA	NA	NA	NA	NA	NA	NA	NA	NA	NA	NA	NA	NA	NA	NA	NA
23121	1747_5	Arm fat-free mass (right)	Hair colour (natural	413074	8658	5e-05	7.28644e-07	2082	181.642	0.0494	0.0406278	0.22388	28	27.9828	-0.266048	0.194295	0.1709	28	-0.332281	0.825583	0.690621	28	-0.00320706	0.112313	0.97743	28	-0.0613495	0.0435128	0.158564	28	-0.040443	0.0596974	0.498109	28	-0.127978	0.198509	0.395749	28	-0.065	0.0466217	0.163257	28	-0.0630595	0.041444	0.12812	28	-0.0613495	0.0366693	0.105867
23122	1727	Arm predicted mass (right)	Ease of skin tanning	413067	8657	5e-07	3.13631e-09	1122	130.656	0.0433	0.0602872	0.47256	NA	NA	NA	NA	NA	NA	NA	NA	NA	NA	NA	NA	NA	NA	NA	NA	NA	NA	NA	NA	NA	NA	NA	NA	NA	NA	NA	NA	NA	NA	NA	NA	NA	NA	NA	NA	NA
23122	1727	Arm predicted mass (right)	Ease of skin tanning	413067	8657	5e-06	4.6875e-08	1541	149.17	0.0783	0.0543276	0.14967	NA	NA	NA	NA	NA	NA	NA	NA	NA	NA	NA	NA	NA	NA	NA	NA	NA	NA	NA	NA	NA	NA	NA	NA	NA	NA	NA	NA	NA	NA	NA	NA	NA	NA	NA	NA	NA
23122	1727	Arm predicted mass (right)	Ease of skin tanning	413067	8657	5e-05	7.28478e-07	2077	174.117	0.0709	0.0486915	0.1451	31	0.00363435	-0.0822713	13.4782	0.99513	31	0.252713	1.02692	0.807347	31	-0.115174	0.133227	0.394178	31	-0.0541677	0.04546	0.23344	31	-0.0673742	0.06559	0.304325	31	-0.0581113	0.23573	0.881643	31	-0.055	0.0507567	0.278542	31	-0.0572412	0.0475325	0.228491	31	-0.0541677	0.0441575	0.229479
23122	1747_5	Arm predicted mass (right)	Hair colour (natural	413067	8657	5e-07	3.13631e-09	1122	130.994	0.0654	0.0525477	0.21325	NA	NA	NA	NA	NA	NA	NA	NA	NA	NA	NA	NA	NA	NA	NA	NA	NA	NA	NA	NA	NA	NA	NA	NA	NA	NA	NA	NA	NA	NA	NA	NA	NA	NA	NA	NA	NA
23122	1747_5	Arm predicted mass (right)	Hair colour (natural	413067	8657	5e-06	4.6875e-08	1541	149.778	0.0723	0.04863	0.13693	NA	NA	NA	NA	NA	NA	NA	NA	NA	NA	NA	NA	NA	NA	NA	NA	NA	NA	NA	NA	NA	NA	NA	NA	NA	NA	NA	NA	NA	NA	NA	NA	NA	NA	NA	NA	NA
23122	1747_5	Arm predicted mass (right)	Hair colour (natural	413067	8657	5e-05	7.28478e-07	2077	172.956	0.0392	0.043739	0.37026	31	0.00378424	-0.143	12.5947	0.99094	31	-0.251991	0.955246	0.793802	31	-0.021671	0.123236	0.861594	31	-0.00401978	0.0422872	0.924268	31	-0.011553	0.0586221	0.843768	31	-0.00305195	0.167197	1	31	-0.005	0.0445332	0.910605	31	-0.00643526	0.0446879	0.885497	31	-0.00401978	0.0350543	0.909469
23123	1727	Arm fat percentage (left)	Ease of skin tanning	413046	8657	5e-07	3.13675e-09	726	55.5349	0.1428	0.0881949	0.10544	NA	NA	NA	NA	NA	NA	NA	NA	NA	NA	NA	NA	NA	NA	NA	NA	NA	NA	NA	NA	NA	NA	NA	NA	NA	NA	NA	NA	NA	NA	NA	NA	NA	NA	NA	NA	NA
23123	1727	Arm fat percentage (left)	Ease of skin tanning	413046	8657	5e-06	4.6881e-08	1061	69.7145	0.135	0.0816641	0.098224	NA	NA	NA	NA	NA	NA	NA	NA	NA	NA	NA	NA	NA	NA	NA	NA	NA	NA	NA	NA	NA	NA	NA	NA	NA	NA	NA	NA	NA	NA	NA	NA	NA	NA	NA	NA	NA
23123	1727	Arm fat percentage (left)	Ease of skin tanning	413046	8657	5e-05	7.28563e-07	1640	84.8435	0.1403	0.0751503	0.06196	26	2.88512	1.04795	0.853938	0.21975	26	2.14075	1.26609	0.103816	26	0.0606611	0.118219	0.612369	26	0.0869039	0.0529984	0.101058	26	0.0673637	0.067609	0.319069	26	0.248728	0.302809	0.286956	26	0.1	0.140819	0.477623	26	0.0716319	0.062306	0.250276	26	0.0869039	0.0529984	0.113582
23123	1747_5	Arm fat percentage (left)	Hair colour (natural	413046	8657	5e-07	3.13675e-09	726	55.2213	-0.0879	0.0795679	0.2691	NA	NA	NA	NA	NA	NA	NA	NA	NA	NA	NA	NA	NA	NA	NA	NA	NA	NA	NA	NA	NA	NA	NA	NA	NA	NA	NA	NA	NA	NA	NA	NA	NA	NA	NA	NA	NA
23123	1747_5	Arm fat percentage (left)	Hair colour (natural	413046	8657	5e-06	4.6881e-08	1061	69.2873	-0.0989	0.0734992	0.17827	NA	NA	NA	NA	NA	NA	NA	NA	NA	NA	NA	NA	NA	NA	NA	NA	NA	NA	NA	NA	NA	NA	NA	NA	NA	NA	NA	NA	NA	NA	NA	NA	NA	NA	NA	NA	NA
23123	1747_5	Arm fat percentage (left)	Hair colour (natural	413046	8657	5e-05	7.28563e-07	1640	84.4528	-0.0877	0.067911	0.19636	26	2.9476	-2.91503	1.86499	0.11805	26	0.199704	1.26714	0.876089	26	-0.0627855	0.130965	0.635816	26	-0.155995	0.0504322	0.00198033	26	-0.116464	0.0659778	0.0775296	26	-0.468004	0.350375	0.0735067	26	-0.12	0.170328	0.481106	26	-0.135005	0.0463609	0.00359063	26	-0.155995	0.0504322	0.00482183
23124	1727	Arm fat mass (left)	Ease of skin tanning	413007	8656	5e-07	3.13657e-09	848	54.1137	0.1411	0.0824257	0.086891	NA	NA	NA	NA	NA	NA	NA	NA	NA	NA	NA	NA	NA	NA	NA	NA	NA	NA	NA	NA	NA	NA	NA	NA	NA	NA	NA	NA	NA	NA	NA	NA	NA	NA	NA	NA	NA
23124	1727	Arm fat mass (left)	Ease of skin tanning	413007	8656	5e-06	4.68785e-08	1212	66.8521	0.1199	0.0766636	0.11785	5	4.99923	8.15337	6.62576	0.21849	5	-4.04281	15.6626	0.81301	5	0.296957	0.233738	0.272784	5	0.239438	0.178733	0.180363	5	0.24424	0.160864	0.128939	5	0.323762	0.315935	0.164987	5	0.46	0.130463	0.000422045	5	0.252971	0.178471	0.156355	5	0.393598	0.121284	0.0476602
23124	1727	Arm fat mass (left)	Ease of skin tanning	413007	8656	5e-05	7.28528e-07	1827	88.2726	0.1156	0.0697466	0.09752	26	25.993	4.88909	5.55166	0.37851	26	1.90107	1.32644	0.164698	26	0.160911	0.168852	0.349728	26	0.0794494	0.0645125	0.218123	26	0.0873654	0.075397	0.246563	26	-5.7801e-15	0.349714	NA	26	0.26	0.259702	0.316755	26	0.082031	0.0683239	0.229898	26	0.0794494	0.0645125	0.229583
23124	1747_5	Arm fat mass (left)	Hair colour (natural	413007	8656	5e-07	3.13657e-09	848	53.2315	-0.0075	0.0640402	0.90735	NA	NA	NA	NA	NA	NA	NA	NA	NA	NA	NA	NA	NA	NA	NA	NA	NA	NA	NA	NA	NA	NA	NA	NA	NA	NA	NA	NA	NA	NA	NA	NA	NA	NA	NA	NA	NA
23124	1747_5	Arm fat mass (left)	Hair colour (natural	413007	8656	5e-06	4.68785e-08	1212	66.3482	0.0015	0.0101698	0.88048	5	0.000588737	-0.924549	123.583	0.99403	5	-4.82773	7.36839	0.5591	5	-0.0213569	0.146993	0.891507	5	-0.0787881	0.0959044	0.411345	5	-0.0191678	0.126414	0.879481	5	-0.012215	0.173257	0.954433	5	-0.085	0.0987384	0.389315	5	-0.0114902	0.0588643	0.845238	5	-0.0787881	0.0676859	0.30911
23124	1747_5	Arm fat mass (left)	Hair colour (natural	413007	8656	5e-05	7.28528e-07	1827	88.243	-0.0187	0.0639715	0.77051	26	0.00360645	-0.14042	14.8023	0.99243	26	-0.397872	1.00334	0.695205	26	-0.0254855	0.131429	0.847813	26	-0.0386895	0.0471085	0.411484	26	-0.0247127	0.0654842	0.705888	26	-0.0191553	0.240367	0.999806	26	-0.04	0.207419	0.847079	26	-0.0510684	0.0531045	0.336221	26	-0.0386895	0.0471085	0.419247
23125	1727	Arm fat-free mass (left)	Ease of skin tanning	412998	8655	5e-07	3.13577e-09	1130	137.085	0.0432	0.0608148	0.47763	NA	NA	NA	NA	NA	NA	NA	NA	NA	NA	NA	NA	NA	NA	NA	NA	NA	NA	NA	NA	NA	NA	NA	NA	NA	NA	NA	NA	NA	NA	NA	NA	NA	NA	NA	NA	NA
23125	1727	Arm fat-free mass (left)	Ease of skin tanning	412998	8655	5e-06	4.68674e-08	1527	154.759	0.0497	0.0584513	0.39517	NA	NA	NA	NA	NA	NA	NA	NA	NA	NA	NA	NA	NA	NA	NA	NA	NA	NA	NA	NA	NA	NA	NA	NA	NA	NA	NA	NA	NA	NA	NA	NA	NA	NA	NA	NA	NA
23125	1727	Arm fat-free mass (left)	Ease of skin tanning	412998	8655	5e-05	7.2837e-07	2099	179.611	0.0666	0.0528647	0.20751	26	25.9486	0.261105	0.436975	0.55015	26	-0.363582	0.933421	0.70033	26	-0.0869167	0.134733	0.524738	26	-0.017929	0.0486861	0.712682	26	-0.0250482	0.0684868	0.714561	26	-0.0048048	0.247566	1	26	-0.015	0.0574062	0.793865	26	-0.0193169	0.0495998	0.69694	26	-0.017929	0.0483686	0.714003
23125	1747_5	Arm fat-free mass (left)	Hair colour (natural	412998	8655	5e-07	3.13577e-09	1130	137.929	0.0963	0.0520845	0.064422	NA	NA	NA	NA	NA	NA	NA	NA	NA	NA	NA	NA	NA	NA	NA	NA	NA	NA	NA	NA	NA	NA	NA	NA	NA	NA	NA	NA	NA	NA	NA	NA	NA	NA	NA	NA	NA
23125	1747_5	Arm fat-free mass (left)	Hair colour (natural	412998	8655	5e-06	4.68674e-08	1527	155.057	0.0779	0.0508194	0.12527	NA	NA	NA	NA	NA	NA	NA	NA	NA	NA	NA	NA	NA	NA	NA	NA	NA	NA	NA	NA	NA	NA	NA	NA	NA	NA	NA	NA	NA	NA	NA	NA	NA	NA	NA	NA	NA
23125	1747_5	Arm fat-free mass (left)	Hair colour (natural	412998	8655	5e-05	7.2837e-07	2099	179.508	0.0522	0.0452841	0.24888	26	25.9575	-0.22013	0.445683	0.62136	26	-1.12219	0.884778	0.216847	26	-0.0367316	0.129237	0.778584	26	-0.0060807	0.0472126	0.897521	26	-0.0127767	0.0662388	0.847046	26	-0.00664843	0.284619	1	26	0.05	1.88524	0.978841	26	-0.00110195	0.0469453	0.981273	26	-0.0060807	0.0472126	0.898551
23126	1727	Arm predicted mass (left)	Ease of skin tanning	412983	8654	5e-07	3.13509e-09	1134	129.206	0.0366	0.0550325	0.50605	NA	NA	NA	NA	NA	NA	NA	NA	NA	NA	NA	NA	NA	NA	NA	NA	NA	NA	NA	NA	NA	NA	NA	NA	NA	NA	NA	NA	NA	NA	NA	NA	NA	NA	NA	NA	NA
23126	1727	Arm predicted mass (left)	Ease of skin tanning	412983	8654	5e-06	4.6858e-08	1524	152.48	0.0543	0.0555189	0.32813	4	3.99952	-0.212381	0.431544	0.62262	4	-0.517766	3.02095	0.879688	4	-0.126099	0.169694	0.511324	4	-0.0628578	0.111742	0.573759	4	-0.0759718	0.128574	0.554602	4	-0.00233246	0.0713036	0.999822	4	-0.065	0.108838	0.550363	4	-0.0630978	0.0709061	0.373531	4	-0.0628578	0.0447897	0.255095
23126	1727	Arm predicted mass (left)	Ease of skin tanning	412983	8654	5e-05	7.28237e-07	2116	168.704	0.022	0.0458933	0.63091	32	31.92	0.162984	0.347365	0.63893	32	-0.776468	0.850315	0.368442	32	-0.133402	0.132588	0.32214	32	-0.0183353	0.0438698	0.675984	32	-0.0447296	0.0653623	0.493765	32	-0.0206706	0.217539	1	32	-0.02	0.0486889	0.68124	32	-0.0195941	0.0459743	0.669964	32	-0.0183353	0.0432353	0.674434
23126	1747_5	Arm predicted mass (left)	Hair colour (natural	412983	8654	5e-07	3.13509e-09	1134	130.303	0.0675	0.0496352	0.17365	NA	NA	NA	NA	NA	NA	NA	NA	NA	NA	NA	NA	NA	NA	NA	NA	NA	NA	NA	NA	NA	NA	NA	NA	NA	NA	NA	NA	NA	NA	NA	NA	NA	NA	NA	NA	NA
23126	1747_5	Arm predicted mass (left)	Hair colour (natural	412983	8654	5e-06	4.6858e-08	1524	153.677	0.0744	0.0482857	0.12348	4	3.99956	-0.380229	0.371685	0.30631	4	0.240465	2.81011	0.939602	4	-0.0422072	0.170105	0.820052	4	-0.124678	0.103943	0.230341	4	-0.0962089	0.121368	0.427952	4	-0.0256429	0.135794	0.403185	4	-0.13	0.104055	0.211542	4	-0.124098	0.0657674	0.0591713	4	-0.124678	0.0616884	0.136512
23126	1747_5	Arm predicted mass (left)	Hair colour (natural	412983	8654	5e-05	7.28237e-07	2116	167.555	0.0504	0.0429333	0.24055	32	31.9953	0.160174	0.308746	0.60391	32	-1.6038	0.792698	0.0520407	32	0.0212051	0.119115	0.859864	32	0.0367281	0.0430155	0.393197	32	0.025097	0.0595353	0.673354	32	0.131543	0.259164	0.666296	32	0.06	0.115821	0.604429	32	0.0423353	0.0423066	0.316982	32	0.0367281	0.0430155	0.399747
23129	1727	Trunk fat-free mass	Ease of skin tanning	412844	8652	5e-07	3.13599e-09	1247	161.342	0.0434	0.048925	0.37481	NA	NA	NA	NA	NA	NA	NA	NA	NA	NA	NA	NA	NA	NA	NA	NA	NA	NA	NA	NA	NA	NA	NA	NA	NA	NA	NA	NA	NA	NA	NA	NA	NA	NA	NA	NA	NA
23129	1727	Trunk fat-free mass	Ease of skin tanning	412844	8652	5e-06	4.68705e-08	1613	182.4	0.0475	0.0485567	0.3284	5	4.99946	-0.465274	0.523575	0.37419	5	-0.382681	2.2125	0.873692	5	-0.140188	0.151598	0.407441	5	-0.123435	0.101388	0.223432	5	-0.137205	0.122744	0.263647	5	-0.00946316	0.0822752	1	5	-0.13	0.0993447	0.190678	5	-0.144895	0.0574387	0.0116492	5	-0.123435	0.0230308	0.00584799
23129	1727	Trunk fat-free mass	Ease of skin tanning	412844	8652	5e-05	7.28414e-07	2183	194.025	0.0563	0.0473622	0.23466	28	27.9964	0.24905	0.18912	0.18788	28	-0.805301	0.867513	0.361797	28	-0.116234	0.140927	0.41672	28	0.0285243	0.0465713	0.540216	28	0.0294832	0.0643593	0.646878	28	0.0594499	0.167891	0.597108	28	0.03	0.049131	0.541456	28	0.0288884	0.0440871	0.512302	28	0.0285243	0.0416088	0.49885
23129	1747_5	Trunk fat-free mass	Hair colour (natural	412844	8652	5e-07	3.13599e-09	1247	162.66	0.0606	0.0439436	0.16811	NA	NA	NA	NA	NA	NA	NA	NA	NA	NA	NA	NA	NA	NA	NA	NA	NA	NA	NA	NA	NA	NA	NA	NA	NA	NA	NA	NA	NA	NA	NA	NA	NA	NA	NA	NA	NA
23129	1747_5	Trunk fat-free mass	Hair colour (natural	412844	8652	5e-06	4.68705e-08	1613	182.614	0.0506	0.0403841	0.20987	5	4.99931	0.109657	0.628276	0.86144	5	-0.246958	2.82213	0.935782	5	0.160817	0.190799	0.446757	5	0.0232564	0.11217	0.835751	5	0.0413634	0.135794	0.760668	5	0.00836379	0.151913	0.991296	5	2.00936e-17	0.221098	1	5	0.0241222	0.104142	0.816827	5	0.0232564	0.11217	0.845878
23129	1747_5	Trunk fat-free mass	Hair colour (natural	412844	8652	5e-05	7.28414e-07	2183	192.393	0.0219	0.0374686	0.55882	28	27.9952	-0.0860385	0.201256	0.66901	28	-0.518274	0.924783	0.579985	28	-0.0748606	0.124435	0.552457	28	-0.00939715	0.0490014	0.84792	28	-0.0182857	0.0635296	0.773477	28	-0.00875452	0.276247	1	28	2.00936e-17	0.0711757	1	28	-0.00640925	0.0496247	0.897235	28	-0.00939715	0.0490014	0.849355
23130	1727	Trunk predicted mass	Ease of skin tanning	412802	8649	5e-07	3.13389e-09	1232	169.76	0.0551	0.0493476	0.264	NA	NA	NA	NA	NA	NA	NA	NA	NA	NA	NA	NA	NA	NA	NA	NA	NA	NA	NA	NA	NA	NA	NA	NA	NA	NA	NA	NA	NA	NA	NA	NA	NA	NA	NA	NA	NA
23130	1727	Trunk predicted mass	Ease of skin tanning	412802	8649	5e-06	4.68415e-08	1611	183.769	0.0523	0.0495378	0.2908	NA	NA	NA	NA	NA	NA	NA	NA	NA	NA	NA	NA	NA	NA	NA	NA	NA	NA	NA	NA	NA	NA	NA	NA	NA	NA	NA	NA	NA	NA	NA	NA	NA	NA	NA	NA	NA
23130	1727	Trunk predicted mass	Ease of skin tanning	412802	8649	5e-05	7.28002e-07	2170	192.52	0.0564	0.0479156	0.23933	29	28.9963	0.381811	0.234937	0.10413	29	-0.911338	0.833483	0.283874	29	-0.116493	0.143847	0.424864	29	0.0394438	0.0459926	0.391107	29	0.0513848	0.0653774	0.431884	29	0.0748185	0.175215	0.470175	29	0.04	0.0487605	0.412025	29	0.0403201	0.0446419	0.366425	29	0.0394438	0.0419273	0.354871
23130	1747_5	Trunk predicted mass	Hair colour (natural	412802	8649	5e-07	3.13389e-09	1232	170.958	0.0519	0.043221	0.22995	NA	NA	NA	NA	NA	NA	NA	NA	NA	NA	NA	NA	NA	NA	NA	NA	NA	NA	NA	NA	NA	NA	NA	NA	NA	NA	NA	NA	NA	NA	NA	NA	NA	NA	NA	NA	NA
23130	1747_5	Trunk predicted mass	Hair colour (natural	412802	8649	5e-06	4.68415e-08	1611	184.098	0.0401	0.0407403	0.32556	NA	NA	NA	NA	NA	NA	NA	NA	NA	NA	NA	NA	NA	NA	NA	NA	NA	NA	NA	NA	NA	NA	NA	NA	NA	NA	NA	NA	NA	NA	NA	NA	NA	NA	NA	NA	NA
23130	1747_5	Trunk predicted mass	Hair colour (natural	412802	8649	5e-05	7.28002e-07	2170	190.852	0.0163	0.0357403	0.64925	29	28.9591	-0.101998	0.250738	0.68416	29	-0.592951	0.872063	0.502331	29	-0.055637	0.128835	0.66916	29	-0.00627214	0.04765	0.895277	29	-0.0126962	0.0617817	0.837181	29	-0.00751073	0.257	1	29	2.00936e-17	0.0672173	1	29	-0.00253019	0.0481346	0.958079	29	-0.00627214	0.04765	0.896219
30100	1727	Mean platelet (thrombocyte) volume	Ease of skin tanning	407987	8532	5e-07	3.11776e-09	954	292.403	0.0001	0.00271782	0.96377	16	12.9204	-0.0525161	0.0713846	0.46193	16	-0.124608	0.336604	0.716781	16	-0.0286949	0.103208	0.784786	16	-0.0429236	0.053709	0.424181	16	-0.00842003	0.0637321	0.894893	16	-0.05075	0.0627687	0.76427	16	2.00936e-17	0.0888697	1	16	-0.0405768	0.0520969	0.436055	16	-0.0429236	0.053709	0.436654
30100	1727	Mean platelet (thrombocyte) volume	Ease of skin tanning	407987	8532	5e-06	4.66182e-08	1216	299.317	-0.0097	0.0286344	0.7361	24	20.8903	-0.0634564	0.0623488	0.30879	24	-0.0520239	0.272045	0.850097	24	-0.0308511	0.0914095	0.738798	24	-0.0518764	0.0476904	0.276695	24	-0.00561594	0.0572137	0.921807	24	-0.0643317	0.0636793	0.593755	24	2.00936e-17	0.077833	1	24	-0.049241	0.0471166	0.295983	24	-0.0518764	0.0476904	0.287963
30100	1727	Mean platelet (thrombocyte) volume	Ease of skin tanning	407987	8532	5e-05	7.24835e-07	1651	299.418	-0.0074	0.0271131	0.78496	52	37.0399	-0.0514911	0.0486302	0.28968	52	-0.102317	0.16759	0.544282	52	-0.0208509	0.0864509	0.810377	52	-0.0311707	0.0315764	0.323567	52	-0.00521286	0.0455172	0.908822	52	-0.0444759	0.0519752	0.716109	52	0.1	0.159536	0.530778	52	-0.023716	0.0345386	0.492302	52	-0.0311707	0.0315764	0.328228
30100	1747_5	Mean platelet (thrombocyte) volume	Hair colour (natural	407987	8532	5e-07	3.11776e-09	954	291.617	-0.0344	0.0276457	0.21299	16	12.2874	-0.0496328	0.074711	0.50648	16	-0.250464	0.331664	0.46266	16	-0.0348765	0.0861492	0.691311	16	-0.0422831	0.0535651	0.429891	16	-0.0177144	0.0586421	0.762594	16	-0.0753509	0.0608163	0.510785	16	-0.1	0.0495183	0.0434397	16	-0.0579027	0.0436839	0.185007	16	-0.075924	0.0404026	0.0811977
30100	1747_5	Mean platelet (thrombocyte) volume	Hair colour (natural	407987	8532	5e-06	4.66182e-08	1216	298.104	-0.0255	0.0267156	0.34059	24	22.3414	-0.0890987	0.0592048	0.13234	24	0.00214595	0.256394	0.993397	24	-0.0459144	0.09054	0.6169	24	-0.0750275	0.0450423	0.0957704	24	-0.0601541	0.0519435	0.246837	24	-0.111992	0.0562381	0.233115	24	-0.13	0.0470517	0.00572868	24	-0.0886305	0.0388181	0.0224171	24	-0.101859	0.0368807	0.0113781
30100	1747_5	Mean platelet (thrombocyte) volume	Hair colour (natural	407987	8532	5e-05	7.24835e-07	1651	298.767	-0.0244	0.0265417	0.35889	52	37.9811	-0.0862287	0.0511444	0.091799	52	-0.0734518	0.170903	0.669197	52	-0.0378539	0.0796181	0.636501	52	-0.0639027	0.0321415	0.0467932	52	-0.0438531	0.0403582	0.277215	52	-0.108348	0.0472987	0.197837	52	-0.11	0.0402954	0.00633646	52	-0.0777416	0.0303808	0.0105002	52	-0.0794224	0.0295006	0.00963047
30300	1727	High light scatter reticulocyte count	Ease of skin tanning	401345	8315	5e-07	3.03884e-09	634	128.523	0.0149	0.0468304	0.7501	NA	NA	NA	NA	NA	NA	NA	NA	NA	NA	NA	NA	NA	NA	NA	NA	NA	NA	NA	NA	NA	NA	NA	NA	NA	NA	NA	NA	NA	NA	NA	NA	NA	NA	NA	NA	NA
30300	1727	High light scatter reticulocyte count	Ease of skin tanning	401345	8315	5e-06	4.55242e-08	903	139.958	0.0149	0.0474704	0.75435	4	3.4856	-0.143292	0.119187	0.22927	4	-1.01313	0.899084	0.376832	4	-0.162606	0.147512	0.350816	4	-0.106819	0.0930153	0.250801	4	-0.128057	0.111198	0.249481	4	-0.0679416	0.0994085	0.255661	4	-0.11	0.0943987	0.24391	4	-0.108383	0.0606109	0.0737481	4	-0.106819	0.0717209	0.233149
30300	1727	High light scatter reticulocyte count	Ease of skin tanning	401345	8315	5e-05	7.09298e-07	1337	154.442	-0.0148	0.0459099	0.74651	31	4.56808	-0.15119	0.108817	0.16471	31	-0.355835	0.352553	0.321174	31	-0.134004	0.110929	0.236481	31	-0.0537741	0.0427503	0.208441	31	-0.0781552	0.0589413	0.184845	31	-0.12501	0.112299	0.140008	31	-0.055	0.0441227	0.212572	31	-0.060837	0.046071	0.186666	31	-0.0537741	0.0308772	0.0918343
30300	1747_5	High light scatter reticulocyte count	Hair colour (natural	401345	8315	5e-07	3.03884e-09	634	128.518	0.0338	0.0482395	0.4836	NA	NA	NA	NA	NA	NA	NA	NA	NA	NA	NA	NA	NA	NA	NA	NA	NA	NA	NA	NA	NA	NA	NA	NA	NA	NA	NA	NA	NA	NA	NA	NA	NA	NA	NA	NA	NA
30300	1747_5	High light scatter reticulocyte count	Hair colour (natural	401345	8315	5e-06	4.55242e-08	903	139.91	0.046	0.0491653	0.34944	4	3.9996	-0.153733	0.120451	0.20185	4	1.27152	0.836333	0.267796	4	-0.0869702	0.122414	0.528669	4	-0.130017	0.104295	0.212533	4	-0.100073	0.108674	0.35713	4	-0.103387	0.121521	0.603155	4	-0.04	0.12214	0.743295	4	-0.121376	0.0917129	0.185691	4	-0.130017	0.104295	0.301002
30300	1747_5	High light scatter reticulocyte count	Hair colour (natural	401345	8315	5e-05	7.09298e-07	1337	154.913	0.0579	0.0466298	0.21429	31	4.63331	-0.0555555	0.113717	0.62517	31	-0.315985	0.327947	0.34325	31	0.0835198	0.100423	0.412161	31	0.013755	0.0397666	0.729424	31	0.0594367	0.0535765	0.267266	31	-0.019438	0.105596	0.997959	31	0.005	0.0463172	0.914034	31	0.0382785	0.0588466	0.515383	31	0.013755	0.0327974	0.677918
30600	1727	Albumin	Ease of skin tanning	367192	7694	5e-07	3.13458e-09	384	74.6154	0.0408	0.062574	0.5146	NA	NA	NA	NA	NA	NA	NA	NA	NA	NA	NA	NA	NA	NA	NA	NA	NA	NA	NA	NA	NA	NA	NA	NA	NA	NA	NA	NA	NA	NA	NA	NA	NA	NA	NA	NA	NA
30600	1727	Albumin	Ease of skin tanning	367192	7694	5e-06	4.6851e-08	539	85.1633	0.046	0.0579692	0.42715	6	1.83236	0.194388	0.154842	0.20934	6	0.298086	0.621092	0.656336	6	0.182376	0.14688	0.269428	6	0.121967	0.0790159	0.122692	6	0.127607	0.0925409	0.167919	6	0.111027	0.119709	0.272641	6	0.125	0.0807885	0.121803	6	0.122375	0.0584682	0.0363476	6	0.121967	0.0624182	0.108112
30600	1727	Albumin	Ease of skin tanning	367192	7694	5e-05	7.28137e-07	885	91.4782	0.0131	0.0451612	0.77182	41	1.89338	0.184174	0.153733	0.23091	41	0.550733	0.387463	0.163154	41	0.126989	0.112433	0.26543	41	0.00472755	0.039163	0.903917	41	0.0536733	0.0513125	0.295558	41	0.0698446	0.181308	0.986039	41	2.00936e-17	0.0589318	1	41	0.0100279	0.0416794	0.809868	41	0.00472755	0.039163	0.904521
30600	1747_5	Albumin	Hair colour (natural	367192	7694	5e-07	3.13458e-09	384	74.8883	-0.0149	0.0523786	0.77547	NA	NA	NA	NA	NA	NA	NA	NA	NA	NA	NA	NA	NA	NA	NA	NA	NA	NA	NA	NA	NA	NA	NA	NA	NA	NA	NA	NA	NA	NA	NA	NA	NA	NA	NA	NA	NA
30600	1747_5	Albumin	Hair colour (natural	367192	7694	5e-06	4.6851e-08	539	85.6265	-0.0017	0.0191974	0.93003	6	1.87276	0.0226826	0.328869	0.94501	6	-0.0543452	0.796495	0.948877	6	-0.00880326	0.131765	0.949322	6	0.0467778	0.0908186	0.606505	6	-0.0199147	0.100779	0.843352	6	0.0330976	0.131724	0.874065	6	2.00936e-17	0.118481	1	6	0.0431608	0.083606	0.605687	6	0.0467778	0.0908186	0.628459
30600	1747_5	Albumin	Hair colour (natural	367192	7694	5e-05	7.28137e-07	885	91.9031	-0.0136	0.0537877	0.8001	41	1.99393	0.0173246	0.202907	0.93196	41	0.0326451	0.33428	0.922704	41	0.00450572	0.0964431	0.96297	41	0.0410574	0.0333705	0.218567	41	0.0312099	0.0468126	0.504964	41	0.0827066	0.15639	0.757452	41	0.04	0.036637	0.274925	41	0.041884	0.0335896	0.212422	41	0.0410574	0.0303836	0.184193
30870	1727	Triglycerides	Ease of skin tanning	400639	8415	5e-07	3.15518e-09	528	92.4998	0.0276	0.0529528	0.60217	9	8.99867	0.0208636	0.0540279	0.69938	9	-0.323877	0.260894	0.254436	9	-0.034065	0.086982	0.705554	9	0.0216299	0.0500574	0.665668	9	-0.0180243	0.0627657	0.773983	9	0.0157303	0.0484921	0.976499	9	0.025	0.0503069	0.619224	9	0.0190766	0.0418305	0.648358	9	0.0216299	0.0338727	0.540952
30870	1727	Triglycerides	Ease of skin tanning	400639	8415	5e-06	4.71361e-08	747	98.6201	0.0209	0.0504002	0.67824	11	10.9872	0.0251688	0.0513072	0.62374	11	-0.231699	0.215491	0.310257	11	-0.0309948	0.0837497	0.719035	11	0.0256355	0.0477043	0.591003	11	-0.00977641	0.0612944	0.873276	11	0.0190461	0.0471745	0.95802	11	0.025	0.0477016	0.600215	11	0.0233618	0.0435047	0.591271	11	0.0256355	0.0292193	0.400885
30870	1727	Triglycerides	Ease of skin tanning	400639	8415	5e-05	7.32179e-07	1157	108.603	0.0097	0.0419745	0.81647	37	13.4829	0.00253515	0.0526947	0.96163	37	0.113462	0.133283	0.400398	37	-0.0239582	0.0751212	0.751625	37	-0.040823	0.0350933	0.24472	37	-0.0339532	0.0499617	0.496767	37	-0.035109	0.0509224	0.800842	37	-0.04	0.037072	0.280596	37	-0.0403086	0.0310961	0.194887	37	-0.040823	0.0350933	0.252373
30870	1747_5	Triglycerides	Hair colour (natural	400639	8415	5e-07	3.15518e-09	528	92.6981	-0.0153	0.0508325	0.76295	9	8.99862	-0.0286831	0.0502659	0.56825	9	0.521188	0.242685	0.0688579	9	0.0429403	0.0824647	0.616669	9	-0.0312476	0.0470801	0.506875	9	0.0231656	0.0623811	0.710373	9	-0.0261262	0.0514287	0.923149	9	-0.03	0.0485372	0.536521	9	-0.0301227	0.0452053	0.505185	9	-0.0312476	0.0470801	0.525537
30870	1747_5	Triglycerides	Hair colour (natural	400639	8415	5e-06	4.71361e-08	747	98.8792	-0.0226	0.0497852	0.65045	11	10.991	-0.0386917	0.0485757	0.42573	11	0.397011	0.200451	0.0789844	11	0.0455135	0.0752678	0.558856	11	-0.0401133	0.0453048	0.375935	11	0.0234798	0.0596981	0.694092	11	-0.0352814	0.051502	0.813668	11	-0.045	0.0547221	0.410885	11	-0.0388739	0.0450381	0.388064	11	-0.0401133	0.0453048	0.396726
30870	1747_5	Triglycerides	Hair colour (natural	400639	8415	5e-05	7.32179e-07	1157	109.53	-0.0337	0.050305	0.50337	37	13.2831	-0.0207065	0.0499933	0.67874	37	0.00524799	0.129177	0.967825	37	0.0264457	0.0694713	0.705684	37	-0.00564415	0.0333377	0.865559	37	0.0163349	0.0481555	0.734451	37	-0.00543929	0.0493585	0.999984	37	-0.01	0.0388054	0.796641	37	-0.00890282	0.0321072	0.781562	37	-0.00564415	0.0333377	0.866507
30890	1727	Vitamin D	Ease of skin tanning	383324	7380	5e-07	2.4731e-09	115	17.6056	-0.0684	0.11387	0.5479	NA	NA	NA	NA	NA	NA	NA	NA	NA	NA	NA	NA	NA	NA	NA	NA	NA	NA	NA	NA	NA	NA	NA	NA	NA	NA	NA	NA	NA	NA	NA	NA	NA	NA	NA	NA	NA
30890	1727	Vitamin D	Ease of skin tanning	383324	7380	5e-06	3.7615e-08	195	20.791	-0.0451	0.117079	0.70015	4	3.99935	0.0770419	0.137433	0.57508	4	-1.1789	1.08113	0.389382	4	-0.0188758	0.158215	0.912575	4	0.028663	0.0959629	0.765178	4	0.0214257	0.11528	0.852556	4	0.00186068	0.0806545	0.983017	4	0.03	0.0954562	0.753308	4	0.029168	0.0642661	0.649928	4	0.028663	0.0630436	0.680241
30890	1727	Vitamin D	Ease of skin tanning	383324	7380	5e-05	5.95911e-07	420	25.3626	-0.0461	0.111712	0.68015	23	5.6864	-0.0365503	0.152004	0.80998	23	0.471275	0.496385	0.353209	23	0.0543184	0.121995	0.660487	23	-0.112163	0.047681	0.0186546	23	-0.0958789	0.0698991	0.170164	23	-0.0344771	0.147127	0.959983	23	-0.125	0.094773	0.187189	23	-0.106787	0.0491075	0.029664	23	-0.112163	0.047681	0.0280135
30890	1747_5	Vitamin D	Hair colour (natural	383324	7380	5e-07	2.4731e-09	115	17.6987	-0.0409	0.109858	0.70936	NA	NA	NA	NA	NA	NA	NA	NA	NA	NA	NA	NA	NA	NA	NA	NA	NA	NA	NA	NA	NA	NA	NA	NA	NA	NA	NA	NA	NA	NA	NA	NA	NA	NA	NA	NA	NA
30890	1747_5	Vitamin D	Hair colour (natural	383324	7380	5e-06	3.7615e-08	195	20.8498	0.0341	0.094047	0.71711	4	3.99916	-0.108488	0.167895	0.51817	4	1.20837	1.00567	0.352518	4	-0.185244	0.161986	0.335782	4	-0.0708991	0.0900991	0.43134	4	-0.0847517	0.109023	0.436938	4	-0.00404283	0.099357	0.982666	4	-0.07	0.0940241	0.45658	4	-0.0731965	0.0826438	0.375787	4	-0.0708991	0.0900991	0.488777
30890	1747_5	Vitamin D	Hair colour (natural	383324	7380	5e-05	5.95911e-07	420	25.3699	-0.0385	0.0893016	0.66599	23	6.33107	-0.0416654	0.145224	0.77418	23	0.0518491	0.460621	0.911446	23	0.00844475	0.110607	0.939831	23	-0.0328813	0.0438546	0.453386	23	-0.0285273	0.0610907	0.640524	23	-0.0110071	0.117761	0.961524	23	-0.035	0.0467403	0.453967	23	-0.0307779	0.0418078	0.461624	23	-0.0328813	0.0397226	0.416688
[truncated: 21 more columns]

## Sheet: Table S11-nc CSA results 2-TEMR
Table S11	Results of negative control study in Central/South Asians by TEMR under three IV selection thresholds (5e-7, 5e-8, 5e-9)
column description:
exposure: phecode of the exposure
outcome: phecode of the outcome
exposure_name: description of the exposure
outcome_name: description of the outcome
Threshold: IV selection threshold
nIV: number of IVs used
beta: causal effect estimate by TEMR
beta.se: standard error of the causal effect estimate by TEMR
beta.pvalue: p-value of the causal effect estimate by TEMR
stat: statistics from the likelihood difference of the causal effect estimate returned by TEMR
exposure	outcome	exposure_name	outcome_name	Threshold	nIV	beta	beta.se	beta.pvalue	stat
30600	1727	Albumin	Ease of skin tanning	5e-07	386	0.0679127	0.0174286	9.75447e-05	-15.1836
30870	1727	Triglycerides	Ease of skin tanning	5e-07	519	-0.0063244	0.018373	0.730679	-0.118489
30890	1727	Vitamin D	Ease of skin tanning	5e-07	120	-0.0343434	0.0234273	0.14266	-2.14902
20015	1727	Sitting height	Ease of skin tanning	5e-07	1580	-0.0403606	0.0117392	0.000585831	-11.8205
21002	1727	Weight	Ease of skin tanning	5e-07	1064	-0.0117449	0.0134895	0.383933	-0.758071
23098	1727	Weight	Ease of skin tanning	5e-07	1013	0.00300026	0.0137198	0.826899	-0.047821
23099	1727	Body fat percentage	Ease of skin tanning	5e-07	765	0.0377193	0.0163566	0.0211074	-5.3179
23100	1727	Whole body fat mass	Ease of skin tanning	5e-07	904	0.00252888	0.0152234	0.868064	-0.0275952
23101	1727	Whole body fat-free mass	Ease of skin tanning	5e-07	1282	-0.0427816	0.012647	0.000717664	-11.4429
23102	1727	Whole body water mass	Ease of skin tanning	5e-07	1263	-0.0320341	0.0127051	0.0116904	-6.35722
23105	1727	Basal metabolic rate	Ease of skin tanning	5e-07	1212	-0.0521896	0.013004	5.98592e-05	-16.1071
23106	1727	Impedance of whole body	Ease of skin tanning	5e-07	1035	-0.0448284	0.0140006	0.00136522	-10.2522
23109	1727	Impedance of arm (right)	Ease of skin tanning	5e-07	1006	0.00805463	0.0151861	0.595839	-0.281317
23110	1727	Impedance of arm (left)	Ease of skin tanning	5e-07	890	-0.0516176	0.0160545	0.00130378	-10.3372
23113	1727	Leg fat-free mass (right)	Ease of skin tanning	5e-07	1153	0.00450403	0.0126115	0.72099	-0.127546
23114	1727	Leg predicted mass (right)	Ease of skin tanning	5e-07	1162	0.00200661	0.0123271	0.870692	-0.0264972
23117	1727	Leg fat-free mass (left)	Ease of skin tanning	5e-07	1184	-0.0352929	0.0126711	0.00534785	-7.75789
23118	1727	Leg predicted mass (left)	Ease of skin tanning	5e-07	1138	-0.0215824	0.0129499	0.095592	-2.77759
23119	1727	Arm fat percentage (right)	Ease of skin tanning	5e-07	718	0.0783178	0.0164106	1.8204e-06	-22.7758
23120	1727	Arm fat mass (right)	Ease of skin tanning	5e-07	812	0.0226158	0.0158784	0.154356	-2.02866
23121	1727	Arm fat-free mass (right)	Ease of skin tanning	5e-07	1080	-0.0533031	0.0139741	0.000136494	-14.5499
23122	1727	Arm predicted mass (right)	Ease of skin tanning	5e-07	1107	-0.056299	0.0136122	3.53553e-05	-17.1057
23123	1727	Arm fat percentage (left)	Ease of skin tanning	5e-07	711	0.0837142	0.0164179	3.4153e-07	-25.9994
23124	1727	Arm fat mass (left)	Ease of skin tanning	5e-07	822	0.0224067	0.0153902	0.14542	-2.11965
23125	1727	Arm fat-free mass (left)	Ease of skin tanning	5e-07	1093	-0.0461671	0.0135812	0.000675494	-11.5555
23126	1727	Arm predicted mass (left)	Ease of skin tanning	5e-07	1102	-0.0601325	0.013986	1.71196e-05	-18.4856
23129	1727	Trunk fat-free mass	Ease of skin tanning	5e-07	1205	-0.0328126	0.0130722	0.0120693	-6.30066
23130	1727	Trunk predicted mass	Ease of skin tanning	5e-07	1194	-0.0434726	0.0131784	0.000971054	-10.882
30100	1727	Mean platelet (thrombocyte) volume	Ease of skin tanning	5e-07	947	0.02392	0.0130599	0.067017	-3.35461
30300	1727	High light scatter reticulocyte count	Ease of skin tanning	5e-07	635	-0.0251501	0.0175946	0.152883	-2.04324
3062	1727	Forced vital capacity (FVC)	Ease of skin tanning	5e-07	621	-0.0789263	0.0179462	1.09283e-05	-19.3419
3063	1727	Forced expiratory volume in 1-second (FEV1)	Ease of skin tanning	5e-07	538	-0.178757	0.0167154	1.08441e-26	-114.364
3064	1727	Peak expiratory flow (PEF)	Ease of skin tanning	5e-07	234	-0.0525095	0.0195604	0.00726438	-7.20641
50	1727	Standing height	Ease of skin tanning	5e-07	1976	-0.0406246	0.0106398	0.000134435	-14.5786
51	1727	Seated height	Ease of skin tanning	5e-07	995	-0.0842213	0.0148247	1.33796e-08	-32.2754
30600	1747_5	Albumin	Hair colour (natural	5e-07	387	0.0572097	0.0154374	0.000210623	-13.7339
30870	1747_5	Triglycerides	Hair colour (natural	5e-07	520	-0.0695894	0.0163222	2.01272e-05	-18.1772
30890	1747_5	Vitamin D	Hair colour (natural	5e-07	120	-0.0108834	0.0211031	0.606047	-0.265972
20015	1747_5	Sitting height	Hair colour (natural	5e-07	1580	-0.00732094	0.0101296	0.469846	-0.522338
21002	1747_5	Weight	Hair colour (natural	5e-07	1068	-0.0217009	0.0116675	0.0628947	-3.45936
23098	1747_5	Weight	Hair colour (natural	5e-07	1016	-0.0168356	0.0118025	0.15374	-2.03474
23099	1747_5	Body fat percentage	Hair colour (natural	5e-07	766	-0.000471903	0.0142563	0.973594	-0.0010957
23100	1747_5	Whole body fat mass	Hair colour (natural	5e-07	904	-0.0205585	0.0133188	0.122693	-2.38261
23101	1747_5	Whole body fat-free mass	Hair colour (natural	5e-07	1282	0.00198772	0.0110212	0.856874	-0.0325278
23102	1747_5	Whole body water mass	Hair colour (natural	5e-07	1263	-0.00165572	0.0110302	0.88068	-0.0225322
23105	1747_5	Basal metabolic rate	Hair colour (natural	5e-07	1213	0.00867062	0.0112771	0.44197	-0.591161
23106	1747_5	Impedance of whole body	Hair colour (natural	5e-07	1035	-0.0327897	0.0120217	0.00638108	-7.43941
23109	1747_5	Impedance of arm (right)	Hair colour (natural	5e-07	1007	-0.0350651	0.0131914	0.00785645	-7.06591
23110	1747_5	Impedance of arm (left)	Hair colour (natural	5e-07	891	-0.0647652	0.013985	3.63847e-06	-21.4465
23113	1747_5	Leg fat-free mass (right)	Hair colour (natural	5e-07	1154	0.00309815	0.0110155	0.778516	-0.0791033
23114	1747_5	Leg predicted mass (right)	Hair colour (natural	5e-07	1162	0.00488422	0.0107242	0.648792	-0.207426
23117	1747_5	Leg fat-free mass (left)	Hair colour (natural	5e-07	1184	-0.00983061	0.0108073	0.36302	-0.82742
23118	1747_5	Leg predicted mass (left)	Hair colour (natural	5e-07	1140	-0.012323	0.0110069	0.262897	-1.25344
23119	1747_5	Arm fat percentage (right)	Hair colour (natural	5e-07	718	-0.0135511	0.0143093	0.343631	-0.896838
23120	1747_5	Arm fat mass (right)	Hair colour (natural	5e-07	812	-0.0092873	0.0138736	0.503226	-0.448126
23121	1747_5	Arm fat-free mass (right)	Hair colour (natural	5e-07	1082	0.012775	0.0122071	0.295322	-1.0952
23122	1747_5	Arm predicted mass (right)	Hair colour (natural	5e-07	1108	0.0313672	0.0118702	0.00822944	-6.98285
23123	1747_5	Arm fat percentage (left)	Hair colour (natural	5e-07	711	-0.0315172	0.0141427	0.0258462	-4.96628
23124	1747_5	Arm fat mass (left)	Hair colour (natural	5e-07	823	-0.0246203	0.0135763	0.0697584	-3.28869
23125	1747_5	Arm fat-free mass (left)	Hair colour (natural	5e-07	1095	0.0318223	0.0118011	0.00700614	-7.2714
23126	1747_5	Arm predicted mass (left)	Hair colour (natural	5e-07	1104	0.0141312	0.0122327	0.24801	-1.33448
23129	1747_5	Trunk fat-free mass	Hair colour (natural	5e-07	1207	0.0122884	0.0113243	0.277864	-1.17751
23130	1747_5	Trunk predicted mass	Hair colour (natural	5e-07	1196	0.00691111	0.0114767	0.547049	-0.36263
30100	1747_5	Mean platelet (thrombocyte) volume	Hair colour (natural	5e-07	948	-0.0397014	0.0110964	0.000346411	-12.8011
30300	1747_5	High light scatter reticulocyte count	Hair colour (natural	5e-07	637	-0.0381989	0.0148234	0.00996813	-6.64058
3062	1747_5	Forced vital capacity (FVC)	Hair colour (natural	5e-07	621	0.0367707	0.0153574	0.016651	-5.73279
3063	1747_5	Forced expiratory volume in 1-second (FEV1)	Hair colour (natural	5e-07	538	0.0394855	0.0140308	0.00488969	-7.91979
3064	1747_5	Peak expiratory flow (PEF)	Hair colour (natural	5e-07	233	-0.106395	0.0170081	3.96164e-10	-39.1317
50	1747_5	Standing height	Hair colour (natural	5e-07	1977	-0.0153981	0.0092659	0.0965523	-2.76159
51	1747_5	Seated height	Hair colour (natural	5e-07	998	0.0260768	0.0127465	0.0407761	-4.1853
30600	1727	Albumin	Ease of skin tanning	5e-08	292	0.0457032	0.0191977	0.0172817	-5.66754
30870	1727	Triglycerides	Ease of skin tanning	5e-08	398	0.000478639	0.0197859	0.9807	-0.000585199
30890	1727	Vitamin D	Ease of skin tanning	5e-08	76	-0.0749197	0.0378027	0.047495	-3.92777
20015	1727	Sitting height	Ease of skin tanning	5e-08	1295	-0.0352831	0.0131932	0.00748781	-7.15206
21002	1727	Weight	Ease of skin tanning	5e-08	777	0.000757813	0.0154128	0.960786	-0.00241746
23098	1727	Weight	Ease of skin tanning	5e-08	743	0.00932706	0.0155411	0.548403	-0.360186
23099	1727	Body fat percentage	Ease of skin tanning	5e-08	534	0.0435563	0.019166	0.0230517	-5.1646
23100	1727	Whole body fat mass	Ease of skin tanning	5e-08	657	0.00817921	0.0175855	0.641852	-0.216328
23101	1727	Whole body fat-free mass	Ease of skin tanning	5e-08	989	-0.0330655	0.0142377	0.0202119	-5.3935
23102	1727	Whole body water mass	Ease of skin tanning	5e-08	968	-0.0342508	0.014425	0.0175773	-5.6378
23105	1727	Basal metabolic rate	Ease of skin tanning	5e-08	947	-0.0489157	0.0143537	0.000654711	-11.6136
23106	1727	Impedance of whole body	Ease of skin tanning	5e-08	801	-0.0731385	0.0176644	3.46624e-05	-17.1433
23109	1727	Impedance of arm (right)	Ease of skin tanning	5e-08	748	0.00111559	0.018	0.950581	-0.00384116
23110	1727	Impedance of arm (left)	Ease of skin tanning	5e-08	678	-0.0147437	0.0177793	0.406954	-0.687681
23113	1727	Leg fat-free mass (right)	Ease of skin tanning	5e-08	882	-0.0146237	0.0139453	0.294342	-1.09965
23114	1727	Leg predicted mass (right)	Ease of skin tanning	5e-08	895	-0.0161372	0.0136686	0.23776	-1.39383
23117	1727	Leg fat-free mass (left)	Ease of skin tanning	5e-08	915	-0.0162086	0.0141186	0.250955	-1.31798
23118	1727	Leg predicted mass (left)	Ease of skin tanning	5e-08	882	-0.00343821	0.0145244	0.812875	-0.0560359
23119	1727	Arm fat percentage (right)	Ease of skin tanning	5e-08	500	0.0852702	0.018917	6.55658e-06	-20.3184
23120	1727	Arm fat mass (right)	Ease of skin tanning	5e-08	563	0.0247541	0.0188726	0.189641	-1.72041
23121	1727	Arm fat-free mass (right)	Ease of skin tanning	5e-08	823	0.00428213	0.013982	0.759407	-0.0937952
23122	1727	Arm predicted mass (right)	Ease of skin tanning	5e-08	847	-0.051618	0.0160294	0.00128094	-10.3698
23123	1727	Arm fat percentage (left)	Ease of skin tanning	5e-08	508	0.102957	0.0198713	2.20503e-07	-26.8445
23124	1727	Arm fat mass (left)	Ease of skin tanning	5e-08	598	0.0335816	0.0182298	0.0654562	-3.39344
23125	1727	Arm fat-free mass (left)	Ease of skin tanning	5e-08	830	-0.0335204	0.015354	0.0290227	-4.76627
23126	1727	Arm predicted mass (left)	Ease of skin tanning	5e-08	826	-0.0484839	0.0155314	0.00179822	-9.74489
23129	1727	Trunk fat-free mass	Ease of skin tanning	5e-08	950	-0.0505011	0.0150084	0.000765819	-11.3223
23130	1727	Trunk predicted mass	Ease of skin tanning	5e-08	944	-0.0554891	0.0149869	0.000213483	-13.7085
30100	1727	Mean platelet (thrombocyte) volume	Ease of skin tanning	5e-08	796	0.0130452	0.0139541	0.34986	-0.873964
30300	1727	High light scatter reticulocyte count	Ease of skin tanning	5e-08	504	-0.0375914	0.0195063	0.0539621	-3.71387
3062	1727	Forced vital capacity (FVC)	Ease of skin tanning	5e-08	447	-0.0707225	0.021152	0.000827191	-11.1792
3063	1727	Forced expiratory volume in 1-second (FEV1)	Ease of skin tanning	5e-08	389	-0.165581	0.0202833	3.25712e-16	-66.6412
3064	1727	Peak expiratory flow (PEF)	Ease of skin tanning	5e-08	156	-0.0579236	0.0414971	0.162761	-1.94839
50	1727	Standing height	Ease of skin tanning	5e-08	1696	-0.0261217	0.0114641	0.022693	-5.19185
51	1727	Seated height	Ease of skin tanning	5e-08	826	-0.0654927	0.0166434	8.31799e-05	-15.4846
30600	1747_5	Albumin	Hair colour (natural	5e-08	292	0.0799989	0.0169847	2.47639e-06	-22.1847
30870	1747_5	Triglycerides	Hair colour (natural	5e-08	398	-0.0925153	0.0176359	1.5556e-07	-27.519
30890	1747_5	Vitamin D	Hair colour (natural	5e-08	76	-0.222896	0.0347533	1.42069e-10	-41.135
20015	1747_5	Sitting height	Hair colour (natural	5e-08	1296	-0.018421	0.0114196	0.106723	-2.60209
21002	1747_5	Weight	Hair colour (natural	5e-08	780	-0.0195654	0.0132311	0.139211	-2.18666
23098	1747_5	Weight	Hair colour (natural	5e-08	745	-0.0149669	0.01329	0.260089	-1.26828
23099	1747_5	Body fat percentage	Hair colour (natural	5e-08	535	0.00293798	0.0165999	0.859518	-0.0313248
23100	1747_5	Whole body fat mass	Hair colour (natural	5e-08	659	-0.0552446	0.0154709	0.000355801	-12.7511
23101	1747_5	Whole body fat-free mass	Hair colour (natural	5e-08	989	-0.00464569	0.01244	0.708815	-0.139464
23102	1747_5	Whole body water mass	Hair colour (natural	5e-08	968	-0.00749854	0.0126165	0.552283	-0.353244
23105	1747_5	Basal metabolic rate	Hair colour (natural	5e-08	948	-0.00251364	0.0125484	0.841234	-0.0401263
23106	1747_5	Impedance of whole body	Hair colour (natural	5e-08	800	-0.0592572	0.0150278	8.0407e-05	-15.5487
23109	1747_5	Impedance of arm (right)	Hair colour (natural	5e-08	749	-0.0301391	0.0155455	0.0525305	-3.75879
23110	1747_5	Impedance of arm (left)	Hair colour (natural	5e-08	679	-0.0500613	0.0155502	0.00128492	-10.3641
23113	1747_5	Leg fat-free mass (right)	Hair colour (natural	5e-08	883	0.00877862	0.0121435	0.469738	-0.522592
23114	1747_5	Leg predicted mass (right)	Hair colour (natural	5e-08	896	0.0118535	0.0118579	0.317492	-0.999249
23117	1747_5	Leg fat-free mass (left)	Hair colour (natural	5e-08	915	-0.0208138	0.0120537	0.0842113	-2.98169
23118	1747_5	Leg predicted mass (left)	Hair colour (natural	5e-08	884	0.0029546	0.0125345	0.813651	-0.055563
23119	1747_5	Arm fat percentage (right)	Hair colour (natural	5e-08	500	-0.0273344	0.0164246	0.096066	-2.76967
23120	1747_5	Arm fat mass (right)	Hair colour (natural	5e-08	563	-0.0243582	0.0164768	0.139318	-2.18548
23121	1747_5	Arm fat-free mass (right)	Hair colour (natural	5e-08	825	0.0252663	0.013762	0.0663647	-3.37072
23122	1747_5	Arm predicted mass (right)	Hair colour (natural	5e-08	848	0.0386415	0.0142358	0.00663986	-7.36789
23123	1747_5	Arm fat percentage (left)	Hair colour (natural	5e-08	508	-0.0306563	0.0169593	0.0706619	-3.26758
23124	1747_5	Arm fat mass (left)	Hair colour (natural	5e-08	599	-0.0468423	0.0159352	0.0032869	-8.64095
23125	1747_5	Arm fat-free mass (left)	Hair colour (natural	5e-08	832	0.0132562	0.0134754	0.325246	-0.967736
23126	1747_5	Arm predicted mass (left)	Hair colour (natural	5e-08	827	0.00731028	0.0138826	0.598488	-0.277283
23129	1747_5	Trunk fat-free mass	Hair colour (natural	5e-08	951	-0.0169208	0.0131256	0.197347	-1.6619
23130	1747_5	Trunk predicted mass	Hair colour (natural	5e-08	945	-0.0215979	0.0131287	0.0999508	-2.70633
30100	1747_5	Mean platelet (thrombocyte) volume	Hair colour (natural	5e-08	796	-0.0365564	0.0118253	0.00199223	-9.55668
30300	1747_5	High light scatter reticulocyte count	Hair colour (natural	5e-08	506	-0.0514466	0.0163675	0.00167107	-9.87976
3062	1747_5	Forced vital capacity (FVC)	Hair colour (natural	5e-08	447	0.0614165	0.0183708	0.000828322	-11.1767
3063	1747_5	Forced expiratory volume in 1-second (FEV1)	Hair colour (natural	5e-08	389	0.0495301	0.017285	0.00416359	-8.21105
3064	1747_5	Peak expiratory flow (PEF)	Hair colour (natural	5e-08	155	-0.0574195	0.0355363	0.106138	-2.61081
50	1747_5	Standing height	Hair colour (natural	5e-08	1697	-0.0248296	0.00998479	0.012892	-6.18387
51	1747_5	Seated height	Hair colour (natural	5e-08	829	0.0368647	0.014271	0.0097892	-6.67286
30600	1727	Albumin	Ease of skin tanning	5e-09	231	0.0548879	0.0214296	0.0104279	-6.5603
30870	1727	Triglycerides	Ease of skin tanning	5e-09	289	-0.00475317	0.0220416	0.829265	-0.0465027
30890	1727	Vitamin D	Ease of skin tanning	5e-09	57	-0.0695043	0.0368985	0.0596106	-3.54819
20015	1727	Sitting height	Ease of skin tanning	5e-09	1098	-0.0227332	0.014579	0.118922	-2.43147
21002	1727	Weight	Ease of skin tanning	5e-09	614	0.00219358	0.0174375	0.899893	-0.0158249
23098	1727	Weight	Ease of skin tanning	5e-09	582	0.0262414	0.0179734	0.144286	-2.13165
23099	1727	Body fat percentage	Ease of skin tanning	5e-09	390	0.0588488	0.0228846	0.0101246	-6.61284
23100	1727	Whole body fat mass	Ease of skin tanning	5e-09	499	0.0505483	0.0211478	0.0168371	-5.71327
23101	1727	Whole body fat-free mass	Ease of skin tanning	5e-09	794	-0.0428308	0.0157216	0.00644308	-7.42201
23102	1727	Whole body water mass	Ease of skin tanning	5e-09	769	-0.0410393	0.0161533	0.0110657	-6.45473
23105	1727	Basal metabolic rate	Ease of skin tanning	5e-09	745	-0.0509327	0.0160587	0.00151575	-10.0594
23106	1727	Impedance of whole body	Ease of skin tanning	5e-09	621	-0.0858022	0.019883	1.59342e-05	-18.6223
23109	1727	Impedance of arm (right)	Ease of skin tanning	5e-09	567	0.0160273	0.0205378	0.435166	-0.608996
23110	1727	Impedance of arm (left)	Ease of skin tanning	5e-09	510	-0.0134528	0.0206457	0.514658	-0.424585
23113	1727	Leg fat-free mass (right)	Ease of skin tanning	5e-09	691	-0.00181297	0.0146324	0.901393	-0.0153516
23114	1727	Leg predicted mass (right)	Ease of skin tanning	5e-09	706	0.00717212	0.0161156	0.656289	-0.198063
23117	1727	Leg fat-free mass (left)	Ease of skin tanning	5e-09	717	-0.00315665	0.0166778	0.849879	-0.035824
23118	1727	Leg predicted mass (left)	Ease of skin tanning	5e-09	670	0.0118026	0.0169646	0.486604	-0.484026
23119	1727	Arm fat percentage (right)	Ease of skin tanning	5e-09	354	0.0848211	0.0220041	0.00011583	-14.8594
23120	1727	Arm fat mass (right)	Ease of skin tanning	5e-09	421	0.0241564	0.0214921	0.261028	-1.2633
23121	1727	Arm fat-free mass (right)	Ease of skin tanning	5e-09	667	-0.060718	0.0181456	0.000819423	-11.1967
23122	1727	Arm predicted mass (right)	Ease of skin tanning	5e-09	680	-0.0684843	0.0184028	0.000198121	-13.8488
23123	1727	Arm fat percentage (left)	Ease of skin tanning	5e-09	363	0.110424	0.0223148	7.47975e-07	-24.4874
23124	1727	Arm fat mass (left)	Ease of skin tanning	5e-09	443	0.0156646	0.0216431	0.469209	-0.523839
23125	1727	Arm fat-free mass (left)	Ease of skin tanning	5e-09	655	-0.0610401	0.0173865	0.000446807	-12.3255
23126	1727	Arm predicted mass (left)	Ease of skin tanning	5e-09	656	-0.0585079	0.0178662	0.00105744	-10.7242
23129	1727	Trunk fat-free mass	Ease of skin tanning	5e-09	789	-0.0410204	0.0163371	0.0120435	-6.30445
23130	1727	Trunk predicted mass	Ease of skin tanning	5e-09	783	-0.0402629	0.0165198	0.0147996	-5.94017
30100	1727	Mean platelet (thrombocyte) volume	Ease of skin tanning	5e-09	706	0.00589076	0.0145553	0.685687	-0.163794
30300	1727	High light scatter reticulocyte count	Ease of skin tanning	5e-09	409	-0.0232797	0.0204236	0.254351	-1.29924
3062	1727	Forced vital capacity (FVC)	Ease of skin tanning	5e-09	358	-0.0587992	0.0230976	0.0109064	-6.48051
3063	1727	Forced expiratory volume in 1-second (FEV1)	Ease of skin tanning	5e-09	292	-0.116026	0.0252946	4.49637e-06	-21.0407
3064	1727	Peak expiratory flow (PEF)	Ease of skin tanning	5e-09	109	-0.0651623	0.0476002	0.171015	-1.87403
50	1727	Standing height	Ease of skin tanning	5e-09	1483	-0.0353153	0.0123927	0.00437626	-8.1207
51	1727	Seated height	Ease of skin tanning	5e-09	686	-0.000805863	0.0154214	0.958325	-0.00273071
30600	1747_5	Albumin	Hair colour (natural	5e-09	231	0.1019	0.0188239	6.18697e-08	-29.3039
30870	1747_5	Triglycerides	Hair colour (natural	5e-09	289	-0.0653233	0.0192889	0.000707699	-11.4689
30890	1747_5	Vitamin D	Hair colour (natural	5e-09	57	-0.201615	0.0347365	6.47101e-09	-33.6877
20015	1747_5	Sitting height	Hair colour (natural	5e-09	1100	-0.0365632	0.0126263	0.0037821	-8.38558
21002	1747_5	Weight	Hair colour (natural	5e-09	618	-0.0109616	0.0149687	0.463987	-0.53626
23098	1747_5	Weight	Hair colour (natural	5e-09	585	-0.0127167	0.0154586	0.410719	-0.676718
23099	1747_5	Body fat percentage	Hair colour (natural	5e-09	391	-0.035494	0.0202442	0.0795518	-3.07404
23100	1747_5	Whole body fat mass	Hair colour (natural	5e-09	500	-0.0528177	0.0184759	0.00425335	-8.17236
23101	1747_5	Whole body fat-free mass	Hair colour (natural	5e-09	794	-0.0199132	0.0139741	0.154155	-2.03064
23102	1747_5	Whole body water mass	Hair colour (natural	5e-09	769	-0.0201764	0.0142927	0.158051	-1.99278
23105	1747_5	Basal metabolic rate	Hair colour (natural	5e-09	746	-0.00576721	0.0140969	0.682458	-0.167373
23106	1747_5	Impedance of whole body	Hair colour (natural	5e-09	621	-0.0804127	0.0168774	1.89308e-06	-22.7006
23109	1747_5	Impedance of arm (right)	Hair colour (natural	5e-09	568	-0.0457145	0.0176061	0.00941764	-6.74186
23110	1747_5	Impedance of arm (left)	Hair colour (natural	5e-09	510	-0.0600598	0.0178456	0.000763999	-11.3267
23113	1747_5	Leg fat-free mass (right)	Hair colour (natural	5e-09	692	0.00927291	0.0142656	0.515681	-0.422523
23114	1747_5	Leg predicted mass (right)	Hair colour (natural	5e-09	707	0.00704042	0.0141357	0.618443	-0.248062
23117	1747_5	Leg fat-free mass (left)	Hair colour (natural	5e-09	717	0.0238379	0.0145551	0.10147	-2.68229
23118	1747_5	Leg predicted mass (left)	Hair colour (natural	5e-09	672	0.0188228	0.0147595	0.202202	-1.6264
23119	1747_5	Arm fat percentage (right)	Hair colour (natural	5e-09	354	-0.0482982	0.0191224	0.0115457	-6.37933
23120	1747_5	Arm fat mass (right)	Hair colour (natural	5e-09	421	-0.04914	0.018985	0.00964338	-6.69961
23121	1747_5	Arm fat-free mass (right)	Hair colour (natural	5e-09	668	0.0207555	0.0160047	0.194688	-1.68178
23122	1747_5	Arm predicted mass (right)	Hair colour (natural	5e-09	681	0.0339787	0.0162679	0.0367352	-4.36265
23123	1747_5	Arm fat percentage (left)	Hair colour (natural	5e-09	363	-0.0512972	0.0192928	0.00784027	-7.0696
23124	1747_5	Arm fat mass (left)	Hair colour (natural	5e-09	442	-0.0285184	0.0189583	0.132511	-2.26283
23125	1747_5	Arm fat-free mass (left)	Hair colour (natural	5e-09	657	0.0231107	0.015441	0.134467	-2.24016
23126	1747_5	Arm predicted mass (left)	Hair colour (natural	5e-09	657	0.0108029	0.0158738	0.496156	-0.463149
23129	1747_5	Trunk fat-free mass	Hair colour (natural	5e-09	790	-0.024111	0.0144236	0.0945965	-2.79436
23130	1747_5	Trunk predicted mass	Hair colour (natural	5e-09	785	-0.0344923	0.0147017	0.0189688	-5.50439
30100	1747_5	Mean platelet (thrombocyte) volume	Hair colour (natural	5e-09	706	-0.0385292	0.0123568	0.00182042	-9.72234
30300	1747_5	High light scatter reticulocyte count	Hair colour (natural	5e-09	412	-0.047121	0.0170087	0.00559861	-7.67516
3062	1747_5	Forced vital capacity (FVC)	Hair colour (natural	5e-09	359	0.0813228	0.0204022	6.72017e-05	-15.888
3063	1747_5	Forced expiratory volume in 1-second (FEV1)	Hair colour (natural	5e-09	292	0.0629212	0.0224307	0.00502961	-7.86876
3064	1747_5	Peak expiratory flow (PEF)	Hair colour (natural	5e-09	109	-0.0678235	0.0411885	0.0996273	-2.7115
50	1747_5	Standing height	Hair colour (natural	5e-09	1484	-0.0252663	0.0107473	0.0187261	-5.52692
51	1747_5	Seated height	Hair colour (natural	5e-09	689	0.0368561	0.0152324	0.0155379	-5.85443

## Sheet: Table S12-nc CSA results 3
Table S12	Results of negative control study in Central/South Asians across three XMR variants (Omega=0, C=I, not correct selection bias) under the IV selection threshold 5e-5
column description:
exposure: phecode of the exposure
outcome: phecode of the outcome
exposure_name: description of the exposure
outcome_name: description of the outcome
exp_N1: sample size of the exposure trait in the auxiliary population
exp_N2: sample size of the exposure trait in the target population
method: specify the correponding XMR variant
nIV: number of IVs used
beta: causal effect estimate
beta.se: standard error of the causal effect estimate
beta.pvalue: p-value of the causal effect estimate
tau.sq: the (3,3) element in the estimated covariance of the causal inference mudule; variance of SNP's direct effect on outcome alpha_j
sigmax11: the (1,1) element in the estimated covariance of the causal inference mudule; variance of SNP's latent true effect on the auxiliary exposure gamma_1,j
sigmax12: the (1,2) element in the estimated covariance of the causal inference mudule; covariance of gamma_1,j and gamma_2,j
sigmax22: the (2,2) element in the estimated covariance of the causal inference mudule; variance of SNP's latent true effect on the target exposure gamma_2,j
IVsignal.sum: total IV strength
nvalid: number of valid IVs detected by the XMR variant
pi0: The probability of IVs to be valid
Threshold: IV selection threshold
Threshold_modified: modified threshold used in the fitting algorithm
exposure	outcome	exposure_name	outcome_name	exp_N1	exp_N2	method	nIV	beta	beta.se	beta.pvalue	tau.sq	sigmax11	sigmax12	sigmax22	IVsignal.sum	nvalid	pi0	Threshold	Threshold_modified
30600	1727	Albumin	Ease of skin tanning	367192	7694	XMR (Omega=0)	885	0.0133	0.0446661	0.76671	1.25464e-05	6.39999e-05	9.43472e-05	0.000353988	0.0634368	114.497	0.129375	5e-05	7.28137e-07
30870	1727	Triglycerides	Ease of skin tanning	400639	8415	XMR (Omega=0)	1157	0.0091	0.0338389	0.78696	2.1643e-05	8.79013e-05	0.000131616	0.000384201	0.0845597	141.09	0.121945	5e-05	7.32179e-07
30890	1727	Vitamin D	Ease of skin tanning	383324	7380	XMR (Omega=0)	420	-0.029	0.0918216	0.75215	2.95965e-05	8.48087e-05	0.000104359	0.000342111	0.0154802	31.3853	0.0747269	5e-05	5.95911e-07
20015	1727	Sitting height	Ease of skin tanning	419233	8649	XMR (Omega=0)	2620	-0.0436	0.0281527	0.12112	1.44777e-05	7.46153e-05	9.76958e-05	0.000334368	0.241918	502.175	0.19167	5e-05	7.02362e-07
21002	1727	Weight	Ease of skin tanning	419316	8771	XMR (Omega=0)	2143	0.0457	0.0443442	0.30294	3.9413e-05	3.86474e-05	6.24516e-05	0.000250186	0.110881	256.19	0.119547	5e-05	7.25233e-07
23098	1727	Weight	Ease of skin tanning	413194	8658	XMR (Omega=0)	2052	0.0396	0.0465352	0.39422	4.59856e-05	3.81389e-05	6.03149e-05	0.000232286	0.105748	259.022	0.126229	5e-05	7.28155e-07
23099	1727	Body fat percentage	Ease of skin tanning	412960	8654	XMR (Omega=0)	1677	0.1114	0.0526064	0.034195	1.3617e-05	2.81303e-05	5.19074e-05	0.000173286	0.0672914	170.719	0.1018	5e-05	7.28331e-07
23100	1727	Whole body fat mass	Ease of skin tanning	412524	8645	XMR (Omega=0)	2006	0.0393	0.0506999	0.43784	2.18162e-05	3.39969e-05	4.93897e-05	0.00024676	0.077076	197.528	0.0984688	5e-05	7.28357e-07
23101	1727	Whole body fat-free mass	Ease of skin tanning	413158	8658	XMR (Omega=0)	2315	0.0568	0.0387678	0.14324	3.90722e-05	4.85097e-05	7.18837e-05	0.00028554	0.151654	336.084	0.145177	5e-05	7.28302e-07
23102	1727	Whole body water mass	Ease of skin tanning	413190	8658	XMR (Omega=0)	2269	0.0559	0.0389809	0.15165	4.02073e-05	4.67183e-05	7.0165e-05	0.000275679	0.151412	341.034	0.150302	5e-05	7.28171e-07
23105	1727	Basal metabolic rate	Ease of skin tanning	413178	8658	XMR (Omega=0)	2278	0.0457	0.0384912	0.23502	4.2704e-05	4.33707e-05	6.35649e-05	0.000276588	0.150651	347.744	0.152653	5e-05	7.2822e-07
23106	1727	Impedance of whole body	Ease of skin tanning	413153	8654	XMR (Omega=0)	2007	-0.0884	0.0426687	0.038377	1.9046e-05	4.23725e-05	6.79783e-05	0.000214037	0.108111	268.373	0.133719	5e-05	7.27545e-07
23109	1727	Impedance of arm (right)	Ease of skin tanning	413141	8658	XMR (Omega=0)	1967	-0.0144	0.0415691	0.72849	2.48806e-05	3.617e-05	6.26092e-05	0.000212435	0.103556	246.44	0.125287	5e-05	7.28371e-07
23110	1727	Impedance of arm (left)	Ease of skin tanning	413157	8658	XMR (Omega=0)	1822	-0.0098	0.0406349	0.81029	1.86868e-05	3.48205e-05	5.88064e-05	0.000192374	0.0941193	242.282	0.132976	5e-05	7.28306e-07
23113	1727	Leg fat-free mass (right)	Ease of skin tanning	413147	8658	XMR (Omega=0)	2200	0.0974	0.0389703	0.012466	3.58191e-05	4.42013e-05	6.75139e-05	0.000293294	0.147805	317.81	0.144459	5e-05	7.28346e-07
23114	1727	Leg predicted mass (right)	Ease of skin tanning	413146	8658	XMR (Omega=0)	2230	0.0926	0.0394978	0.01902	4.16559e-05	4.34901e-05	6.41134e-05	0.000294078	0.15126	333.983	0.149768	5e-05	7.2835e-07
23117	1727	Leg fat-free mass (left)	Ease of skin tanning	413118	8658	XMR (Omega=0)	2237	0.0754	0.0393307	0.055256	4.08845e-05	4.29008e-05	6.59508e-05	0.000280103	0.144791	320.458	0.143253	5e-05	7.28464e-07
23118	1727	Leg predicted mass (left)	Ease of skin tanning	413113	8658	XMR (Omega=0)	2150	0.0912	0.0393765	0.020576	3.24086e-05	4.39593e-05	6.85439e-05	0.00026572	0.138287	310.858	0.144585	5e-05	7.28485e-07
23119	1727	Arm fat percentage (right)	Ease of skin tanning	413107	8658	XMR (Omega=0)	1636	0.1653	0.0536769	0.0020671	1.98735e-05	3.18166e-05	5.53542e-05	0.00022459	0.0662574	153.952	0.0941024	5e-05	7.28509e-07
23120	1727	Arm fat mass (right)	Ease of skin tanning	413080	8658	XMR (Omega=0)	1800	0.087	0.0507387	0.086545	1.93379e-05	3.5614e-05	5.46622e-05	0.000229455	0.0715385	181.624	0.100902	5e-05	7.28619e-07
23121	1727	Arm fat-free mass (right)	Ease of skin tanning	413074	8658	XMR (Omega=0)	2082	0.0551	0.0397839	0.16569	3.03559e-05	4.06901e-05	6.28828e-05	0.000262157	0.126108	290.936	0.139739	5e-05	7.28644e-07
23122	1727	Arm predicted mass (right)	Ease of skin tanning	413067	8657	XMR (Omega=0)	2077	0.0655	0.0403687	0.1047	2.96233e-05	4.7404e-05	7.101e-05	0.000242823	0.118646	287.66	0.138498	5e-05	7.28478e-07
23123	1727	Arm fat percentage (left)	Ease of skin tanning	413046	8657	XMR (Omega=0)	1640	0.1522	0.0512291	0.0029693	1.4048e-05	3.31675e-05	6.02801e-05	0.000197125	0.0668304	157.473	0.0960202	5e-05	7.28563e-07
23124	1727	Arm fat mass (left)	Ease of skin tanning	413007	8656	XMR (Omega=0)	1827	0.101	0.0527539	0.055657	3.20556e-05	3.51904e-05	5.56373e-05	0.000225178	0.0757018	190.085	0.104042	5e-05	7.28528e-07
23125	1727	Arm fat-free mass (left)	Ease of skin tanning	412998	8655	XMR (Omega=0)	2099	0.0698	0.041368	0.091511	3.03332e-05	4.52252e-05	6.63138e-05	0.000239564	0.119424	298.838	0.142372	5e-05	7.2837e-07
23126	1727	Arm predicted mass (left)	Ease of skin tanning	412983	8654	XMR (Omega=0)	2116	0.0296	0.0411631	0.47148	2.11313e-05	4.41584e-05	6.51007e-05	0.00024747	0.114667	281.03	0.132812	5e-05	7.28237e-07
23129	1727	Trunk fat-free mass	Ease of skin tanning	412844	8652	XMR (Omega=0)	2183	0.0359	0.037233	0.33499	3.14398e-05	5.2461e-05	7.66406e-05	0.000267768	0.144537	333.328	0.152693	5e-05	7.28414e-07
23130	1727	Trunk predicted mass	Ease of skin tanning	412802	8649	XMR (Omega=0)	2170	0.0348	0.0375858	0.35463	3.00948e-05	5.30481e-05	7.78771e-05	0.000266865	0.143348	329.491	0.151839	5e-05	7.28002e-07
30100	1727	Mean platelet (thrombocyte) volume	Ease of skin tanning	407987	8532	XMR (Omega=0)	1651	-0.0046	0.0218586	0.83447	1.39949e-05	0.000117824	0.000164049	0.00039628	0.227344	381.232	0.23091	5e-05	7.24835e-07
30300	1727	High light scatter reticulocyte count	Ease of skin tanning	401345	8315	XMR (Omega=0)	1337	-0.007	0.0331093	0.83231	2.55692e-05	9.11956e-05	0.000114672	0.000317854	0.0979914	208.085	0.155636	5e-05	7.09298e-07
3062	1727	Forced vital capacity (FVC)	Ease of skin tanning	383471	8080	XMR (Omega=0)	1359	-0.015	0.0428638	0.72663	1.32485e-05	4.28447e-05	5.54413e-05	0.000248681	0.0631122	165.508	0.121787	5e-05	7.3755e-07
3063	1727	Forced expiratory volume in 1-second (FEV1)	Ease of skin tanning	383471	8080	XMR (Omega=0)	1268	-0.1404	0.0568832	0.013606	1.99468e-05	4.03757e-05	6.17397e-05	0.000234618	0.0593662	142.435	0.112331	5e-05	7.3755e-07
3064	1727	Peak expiratory flow (PEF)	Ease of skin tanning	383471	8080	XMR (Omega=0)	666	-0.232	0.102686	0.023848	1.4559e-05	2.72685e-05	4.4281e-05	0.000138285	0.016709	52.1634	0.0783235	5e-05	7.3755e-07
50	1727	Standing height	Ease of skin tanning	419596	8657	XMR (Omega=0)	2983	-0.0544	0.0236788	0.021629	1.26052e-05	7.92461e-05	0.000103074	0.00032809	0.34162	718.81	0.240969	5e-05	7.02459e-07
51	1727	Seated height	Ease of skin tanning	419245	8649	XMR (Omega=0)	1851	-0.0091	0.031296	0.77039	1.6105e-05	6.44659e-05	8.11187e-05	0.000333848	0.143489	308.11	0.166456	5e-05	7.02315e-07
30600	1747_5	Albumin	Hair colour (natural	367192	7694	XMR (Omega=0)	885	0.0024	0.0286876	0.93308	2.28292e-05	6.40741e-05	9.42204e-05	0.000355136	0.0634112	114.428	0.129297	5e-05	7.28137e-07
30870	1747_5	Triglycerides	Hair colour (natural	400639	8415	XMR (Omega=0)	1157	-0.0295	0.0473511	0.53291	3.99655e-05	8.75467e-05	0.000131171	0.000383298	0.0848774	141.813	0.122569	5e-05	7.32179e-07
30890	1747_5	Vitamin D	Hair colour (natural	383324	7380	XMR (Omega=0)	420	-0.0172	0.0738822	0.81639	1.23696e-05	8.5199e-05	0.000107085	0.000334688	0.0153494	31.1575	0.0741846	5e-05	5.95911e-07
20015	1747_5	Sitting height	Hair colour (natural	419233	8649	XMR (Omega=0)	2620	-0.0077	0.0236236	0.74439	1.35963e-05	7.44356e-05	9.73215e-05	0.000337125	0.243149	503.081	0.192016	5e-05	7.02362e-07
21002	1747_5	Weight	Hair colour (natural	419316	8771	XMR (Omega=0)	2143	0.0124	0.0325845	0.70269	1.68258e-05	3.85619e-05	6.22543e-05	0.000247985	0.110604	256.657	0.119765	5e-05	7.25233e-07
23098	1747_5	Weight	Hair colour (natural	413194	8658	XMR (Omega=0)	2052	0.0123	0.0323118	0.70348	1.36208e-05	3.82457e-05	6.03712e-05	0.000228203	0.104474	258.065	0.125763	5e-05	7.28155e-07
23099	1747_5	Body fat percentage	Hair colour (natural	412960	8654	XMR (Omega=0)	1677	-0.0899	0.0530258	0.090149	2.25867e-05	2.80616e-05	5.14867e-05	0.000176279	0.0677145	171.729	0.102402	5e-05	7.28331e-07
23100	1747_5	Whole body fat mass	Hair colour (natural	412524	8645	XMR (Omega=0)	2006	-0.0587	0.0469855	0.21163	1.58176e-05	3.40662e-05	4.95821e-05	0.00024611	0.0769298	197.011	0.098211	5e-05	7.28357e-07
23101	1747_5	Whole body fat-free mass	Hair colour (natural	413158	8658	XMR (Omega=0)	2315	0.0009	0.0062154	0.89105	1.59685e-05	4.87233e-05	7.21547e-05	0.000281589	0.14991	334.689	0.144574	5e-05	7.28302e-07
23102	1747_5	Whole body water mass	Hair colour (natural	413190	8658	XMR (Omega=0)	2269	0.022	0.0322415	0.49451	1.33305e-05	4.69639e-05	7.05938e-05	0.000271608	0.149594	339.238	0.14951	5e-05	7.28171e-07
23105	1747_5	Basal metabolic rate	Hair colour (natural	413178	8658	XMR (Omega=0)	2278	0.0215	0.0320982	0.50232	1.44091e-05	4.33642e-05	6.37871e-05	0.000272468	0.149842	348.009	0.152769	5e-05	7.2822e-07
23106	1747_5	Impedance of whole body	Hair colour (natural	413153	8654	XMR (Omega=0)	2007	-0.051	0.0374753	0.1733	9.33974e-06	4.23739e-05	6.80122e-05	0.000213635	0.107782	267.724	0.133395	5e-05	7.27545e-07
23109	1747_5	Impedance of arm (right)	Hair colour (natural	413141	8658	XMR (Omega=0)	1967	-0.0918	0.0389449	0.018428	1.41551e-05	3.63578e-05	6.2789e-05	0.000210103	0.102413	245.26	0.124687	5e-05	7.28371e-07
23110	1747_5	Impedance of arm (left)	Hair colour (natural	413157	8658	XMR (Omega=0)	1822	-0.0962	0.0408013	0.018389	1.44985e-05	3.49479e-05	5.89393e-05	0.000191142	0.0934198	241.389	0.132485	5e-05	7.28306e-07
23113	1747_5	Leg fat-free mass (right)	Hair colour (natural	413147	8658	XMR (Omega=0)	2200	-0.0024	0.0181214	0.8964	8.59822e-06	4.44861e-05	6.74477e-05	0.000293981	0.146575	315.945	0.143612	5e-05	7.28346e-07
23114	1747_5	Leg predicted mass (right)	Hair colour (natural	413146	8658	XMR (Omega=0)	2230	0.0024	0.012908	0.85298	8.09256e-06	4.37437e-05	6.39974e-05	0.000294544	0.150031	332.251	0.148992	5e-05	7.2835e-07
23117	1747_5	Leg fat-free mass (left)	Hair colour (natural	413118	8658	XMR (Omega=0)	2237	-0.0116	0.0313831	0.71065	8.42451e-06	4.30237e-05	6.5777e-05	0.000277686	0.143521	320.192	0.143134	5e-05	7.28464e-07
23118	1747_5	Leg predicted mass (left)	Hair colour (natural	413113	8658	XMR (Omega=0)	2150	-0.0101	0.0309867	0.74518	1.02453e-05	4.41169e-05	6.84755e-05	0.000264452	0.137316	310.312	0.144331	5e-05	7.28485e-07
23119	1747_5	Arm fat percentage (right)	Hair colour (natural	413107	8658	XMR (Omega=0)	1636	-0.086	0.0501738	0.086514	2.36269e-05	3.19468e-05	5.54282e-05	0.000226941	0.0661181	153.395	0.0937623	5e-05	7.28509e-07
23120	1747_5	Arm fat mass (right)	Hair colour (natural	413080	8658	XMR (Omega=0)	1800	-0.0694	0.0509013	0.17262	2.44881e-05	3.56252e-05	5.45841e-05	0.000229614	0.0715103	181.7	0.100944	5e-05	7.28619e-07
23121	1747_5	Arm fat-free mass (right)	Hair colour (natural	413074	8658	XMR (Omega=0)	2082	0.0339	0.0358227	0.34441	1.54081e-05	4.06988e-05	6.2926e-05	0.000261217	0.126038	291.116	0.139825	5e-05	7.28644e-07
23122	1747_5	Arm predicted mass (right)	Hair colour (natural	413067	8657	XMR (Omega=0)	2077	0.0301	0.0375321	0.42298	2.16181e-05	4.72088e-05	7.09091e-05	0.000242758	0.11943	288.975	0.139131	5e-05	7.28478e-07
23123	1747_5	Arm fat percentage (left)	Hair colour (natural	413046	8657	XMR (Omega=0)	1640	-0.0919	0.0484994	0.058203	2.05241e-05	3.33462e-05	6.0256e-05	0.000200889	0.0666951	156.692	0.0955438	5e-05	7.28563e-07
23124	1747_5	Arm fat mass (left)	Hair colour (natural	413007	8656	XMR (Omega=0)	1827	-0.0858	0.0488986	0.079276	1.98395e-05	3.52831e-05	5.58966e-05	0.000223437	0.0754174	189.69	0.103826	5e-05	7.28528e-07
23125	1747_5	Arm fat-free mass (left)	Hair colour (natural	412998	8655	XMR (Omega=0)	2099	0.0462	0.0374942	0.21757	2.07199e-05	4.51661e-05	6.64135e-05	0.000238082	0.119405	299.186	0.142537	5e-05	7.2837e-07
23126	1747_5	Arm predicted mass (left)	Hair colour (natural	412983	8654	XMR (Omega=0)	2116	0.0307	0.037419	0.41176	2.27137e-05	4.41947e-05	6.51922e-05	0.000246625	0.114398	280.819	0.132712	5e-05	7.28237e-07
23129	1747_5	Trunk fat-free mass	Hair colour (natural	412844	8652	XMR (Omega=0)	2183	0.0249	0.0337864	0.46058	1.41849e-05	5.25717e-05	7.70469e-05	0.00026414	0.14364	332.935	0.152513	5e-05	7.28414e-07
23130	1747_5	Trunk predicted mass	Hair colour (natural	412802	8649	XMR (Omega=0)	2170	0.0186	0.0336243	0.58043	1.32048e-05	5.32348e-05	7.83372e-05	0.000263411	0.142269	328.633	0.151444	5e-05	7.28002e-07
30100	1747_5	Mean platelet (thrombocyte) volume	Hair colour (natural	407987	8532	XMR (Omega=0)	1651	-0.0189	0.0243034	0.4379	8.5365e-06	0.000117883	0.000163985	0.000395745	0.226954	381.105	0.230833	5e-05	7.24835e-07
30300	1747_5	High light scatter reticulocyte count	Hair colour (natural	401345	8315	XMR (Omega=0)	1337	0.0569	0.0406661	0.16154	2.03787e-05	9.0981e-05	0.000115229	0.0003157	0.0981252	208.516	0.155958	5e-05	7.09298e-07
3062	1747_5	Forced vital capacity (FVC)	Hair colour (natural	383471	8080	XMR (Omega=0)	1359	0.0929	0.0529341	0.079317	2.4318e-05	4.30474e-05	5.56178e-05	0.00025042	0.0629004	164.629	0.12114	5e-05	7.3755e-07
3063	1747_5	Forced expiratory volume in 1-second (FEV1)	Hair colour (natural	383471	8080	XMR (Omega=0)	1268	0.1298	0.0575545	0.024163	4.10667e-05	4.0453e-05	6.15638e-05	0.000242657	0.0600285	142.151	0.112107	5e-05	7.3755e-07
3064	1747_5	Peak expiratory flow (PEF)	Hair colour (natural	383471	8080	XMR (Omega=0)	666	0.0017	0.0186099	0.92588	2.66261e-05	2.71601e-05	4.38266e-05	0.000147309	0.0170966	52.4096	0.0786931	5e-05	7.3755e-07
50	1747_5	Standing height	Hair colour (natural	419596	8657	XMR (Omega=0)	2983	-0.0136	0.0200662	0.49867	1.00767e-05	7.88385e-05	0.000102685	0.00032918	0.343494	721.549	0.241887	5e-05	7.02459e-07
51	1747_5	Seated height	Hair colour (natural	419245	8649	XMR (Omega=0)	1851	0.0275	0.0328276	0.4026	8.88865e-06	6.46961e-05	8.1293e-05	0.000335084	0.143247	307.079	0.165899	5e-05	7.02315e-07
30600	1727	Albumin	Ease of skin tanning	367192	7694	XMR (C=I)	885	0.0155	0.0459707	0.73621	1.47367e-05	6.99097e-05	0.000106484	0.000393916	0.0596138	98.3517	0.111132	5e-05	7.28137e-07
30870	1727	Triglycerides	Ease of skin tanning	400639	8415	XMR (C=I)	1157	0.0202	0.0465202	0.66473	2.63939e-05	0.000100098	0.000157105	0.000424603	0.0770419	116.272	0.100495	5e-05	7.32179e-07
30890	1727	Vitamin D	Ease of skin tanning	383324	7380	XMR (C=I)	420	-0.0563	0.111218	0.61296	1.05627e-05	9.77779e-05	0.000136641	0.000315377	0.0134357	26.0719	0.0620759	5e-05	5.95911e-07
20015	1727	Sitting height	Ease of skin tanning	419233	8649	XMR (C=I)	2620	-0.0865	0.0307983	0.0049606	1.75584e-05	7.55096e-05	0.000108607	0.000371918	0.224061	419.467	0.160102	5e-05	7.02362e-07
21002	1727	Weight	Ease of skin tanning	419316	8771	XMR (C=I)	2143	0.0012	0.00931844	0.89976	4.36324e-05	4.16472e-05	8.36227e-05	0.00027593	0.0846732	162.016	0.0756024	5e-05	7.25233e-07
23098	1727	Weight	Ease of skin tanning	413194	8658	XMR (C=I)	2052	-0.0157	0.0500765	0.75349	4.52494e-05	4.07621e-05	8.23805e-05	0.000259802	0.0833809	163.142	0.079504	5e-05	7.28155e-07
23099	1727	Body fat percentage	Ease of skin tanning	412960	8654	XMR (C=I)	1677	0.1532	0.0685997	0.025515	1.83357e-05	2.772e-05	6.58506e-05	0.000214766	0.0498922	99.3951	0.0592696	5e-05	7.28331e-07
23100	1727	Whole body fat mass	Ease of skin tanning	412524	8645	XMR (C=I)	2006	0.0627	0.0594069	0.29132	2.1556e-05	3.98913e-05	7.4229e-05	0.000275105	0.0508373	104.011	0.0518498	5e-05	7.28357e-07
23101	1727	Whole body fat-free mass	Ease of skin tanning	413158	8658	XMR (C=I)	2315	0.0614	0.0455575	0.17753	4.72549e-05	5.5261e-05	9.90988e-05	0.000309034	0.122193	228.552	0.0987266	5e-05	7.28302e-07
23102	1727	Whole body water mass	Ease of skin tanning	413190	8658	XMR (C=I)	2269	0.0595	0.0455731	0.19142	4.86758e-05	5.25224e-05	9.46224e-05	0.000304932	0.123208	233.523	0.102919	5e-05	7.28171e-07
23105	1727	Basal metabolic rate	Ease of skin tanning	413178	8658	XMR (C=I)	2278	0.0432	0.047176	0.36	5.56146e-05	4.8195e-05	8.42503e-05	0.000318474	0.120476	232.025	0.101855	5e-05	7.2822e-07
23106	1727	Impedance of whole body	Ease of skin tanning	413153	8654	XMR (C=I)	2007	-0.0794	0.0480666	0.098557	2.13001e-05	4.00446e-05	8.20614e-05	0.000235299	0.0998956	203.285	0.101288	5e-05	7.27545e-07
23109	1727	Impedance of arm (right)	Ease of skin tanning	413141	8658	XMR (C=I)	1967	0.0143	0.0301213	0.6342	3.02946e-05	3.0447e-05	7.31484e-05	0.000211279	0.103284	199.013	0.101176	5e-05	7.28371e-07
23110	1727	Impedance of arm (left)	Ease of skin tanning	413157	8658	XMR (C=I)	1822	-0.0071	0.0359384	0.84365	1.84628e-05	2.49645e-05	6.29778e-05	0.000179262	0.108567	223.373	0.122598	5e-05	7.28306e-07
23113	1727	Leg fat-free mass (right)	Ease of skin tanning	413147	8658	XMR (C=I)	2200	0.0758	0.048916	0.12124	4.23596e-05	5.12359e-05	8.76389e-05	0.000335362	0.113385	211.884	0.0963111	5e-05	7.28346e-07
23114	1727	Leg predicted mass (right)	Ease of skin tanning	413146	8658	XMR (C=I)	2230	0.0721	0.048606	0.13791	4.82089e-05	4.93039e-05	8.18507e-05	0.000336541	0.117112	224.642	0.100736	5e-05	7.2835e-07
23117	1727	Leg fat-free mass (left)	Ease of skin tanning	413118	8658	XMR (C=I)	2237	0.063	0.0498127	0.20563	4.93607e-05	4.78541e-05	8.27037e-05	0.000319118	0.11171	216.638	0.0968431	5e-05	7.28464e-07
23118	1727	Leg predicted mass (left)	Ease of skin tanning	413113	8658	XMR (C=I)	2150	0.0837	0.0496078	0.091406	3.95122e-05	5.13352e-05	8.98235e-05	0.000306682	0.104978	203.405	0.0946069	5e-05	7.28485e-07
23119	1727	Arm fat percentage (right)	Ease of skin tanning	413107	8658	XMR (C=I)	1636	0.1689	0.0722733	0.019412	4.12497e-05	3.41593e-05	7.89406e-05	0.000256136	0.0490181	87.6699	0.053588	5e-05	7.28509e-07
23120	1727	Arm fat mass (right)	Ease of skin tanning	413080	8658	XMR (C=I)	1800	0.1024	0.0691344	0.13837	2.63984e-05	4.63919e-05	8.5605e-05	0.000260576	0.0448278	91.8947	0.0510526	5e-05	7.28619e-07
23121	1727	Arm fat-free mass (right)	Ease of skin tanning	413074	8658	XMR (C=I)	2082	0.03	0.0451038	0.50563	4.81113e-05	4.30275e-05	8.16473e-05	0.000297259	0.104655	199.588	0.0958637	5e-05	7.28644e-07
23122	1727	Arm predicted mass (right)	Ease of skin tanning	413067	8657	XMR (C=I)	2077	0.0568	0.0460668	0.21748	3.91861e-05	5.53041e-05	9.89828e-05	0.000274523	0.0945775	188.813	0.0909068	5e-05	7.28478e-07
23123	1727	Arm fat percentage (left)	Ease of skin tanning	413046	8657	XMR (C=I)	1640	0.1477	0.0712181	0.038127	3.01456e-05	3.77394e-05	7.90174e-05	0.000259798	0.0475335	91.0932	0.0555446	5e-05	7.28563e-07
23124	1727	Arm fat mass (left)	Ease of skin tanning	413007	8656	XMR (C=I)	1827	0.109	0.0655941	0.096448	2.91631e-05	4.32468e-05	8.45908e-05	0.000268706	0.0521374	101.21	0.0553967	5e-05	7.28528e-07
23125	1727	Arm fat-free mass (left)	Ease of skin tanning	412998	8655	XMR (C=I)	2099	0.0512	0.0487728	0.29373	3.94497e-05	5.03048e-05	8.73469e-05	0.000290142	0.100489	202.955	0.0966915	5e-05	7.2837e-07
23126	1727	Arm predicted mass (left)	Ease of skin tanning	412983	8654	XMR (C=I)	2116	0.0087	0.0340267	0.79846	3.02613e-05	4.96318e-05	8.67412e-05	0.000303841	0.0972238	190.187	0.0898805	5e-05	7.28237e-07
23129	1727	Trunk fat-free mass	Ease of skin tanning	412844	8652	XMR (C=I)	2183	0.0346	0.0426886	0.41803	3.84331e-05	6.45117e-05	0.000109474	0.00029724	0.112371	218.272	0.099987	5e-05	7.28414e-07
23130	1727	Trunk predicted mass	Ease of skin tanning	412802	8649	XMR (C=I)	2170	0.0337	0.0433199	0.43683	3.89516e-05	6.59119e-05	0.000111407	0.000300775	0.111005	214.088	0.098658	5e-05	7.28002e-07
30100	1727	Mean platelet (thrombocyte) volume	Ease of skin tanning	407987	8532	XMR (C=I)	1651	-0.0055	0.0257491	0.83051	1.42606e-05	0.000135361	0.000190537	0.000434754	0.204524	318.416	0.192862	5e-05	7.24835e-07
30300	1727	High light scatter reticulocyte count	Ease of skin tanning	401345	8315	XMR (C=I)	1337	-0.0102	0.041136	0.8044	3.22009e-05	0.000105764	0.0001384	0.000345655	0.0858858	167.354	0.125171	5e-05	7.09298e-07
3062	1727	Forced vital capacity (FVC)	Ease of skin tanning	383471	8080	XMR (C=I)	1359	-0.1238	0.0661832	0.06137	2.08987e-05	4.91033e-05	8.3299e-05	0.000271596	0.0528	109.867	0.0808443	5e-05	7.3755e-07
3063	1727	Forced expiratory volume in 1-second (FEV1)	Ease of skin tanning	383471	8080	XMR (C=I)	1268	-0.2087	0.0675025	0.0019892	2.6494e-05	4.51634e-05	8.41062e-05	0.000252739	0.0495559	99.9546	0.0788285	5e-05	7.3755e-07
3064	1727	Peak expiratory flow (PEF)	Ease of skin tanning	383471	8080	XMR (C=I)	666	-0.2701	0.142107	0.057323	2.3118e-05	3.46579e-05	6.32308e-05	0.000156706	0.0110079	29.1121	0.0437118	5e-05	7.3755e-07
50	1727	Standing height	Ease of skin tanning	419596	8657	XMR (C=I)	2983	-0.0797	0.026518	0.0026404	1.26864e-05	8.23137e-05	0.000119103	0.00036519	0.303409	573.44	0.192236	5e-05	7.02459e-07
51	1727	Seated height	Ease of skin tanning	419245	8649	XMR (C=I)	1851	-0.0495	0.0399853	0.21544	1.75725e-05	7.35429e-05	9.94976e-05	0.000386315	0.125252	234.413	0.126641	5e-05	7.02315e-07
30600	1747_5	Albumin	Hair colour (natural	367192	7694	XMR (C=I)	885	-0.0051	0.0371969	0.89036	2.5148e-05	6.97023e-05	0.000106144	0.000394924	0.0598835	98.6984	0.111524	5e-05	7.28137e-07
30870	1747_5	Triglycerides	Hair colour (natural	400639	8415	XMR (C=I)	1157	-0.0444	0.0494248	0.36867	3.98378e-05	9.92593e-05	0.000155413	0.000427201	0.0779125	117.56	0.101608	5e-05	7.32179e-07
30890	1747_5	Vitamin D	Hair colour (natural	383324	7380	XMR (C=I)	420	-0.0409	0.0893278	0.64729	1.18741e-05	9.75567e-05	0.000136307	0.000318007	0.0135229	26.1559	0.0622759	5e-05	5.95911e-07
20015	1747_5	Sitting height	Hair colour (natural	419233	8649	XMR (C=I)	2620	-0.0214	0.0281112	0.44679	1.47681e-05	7.61627e-05	0.000109254	0.000370788	0.221995	416.974	0.159151	5e-05	7.02362e-07
21002	1747_5	Weight	Hair colour (natural	419316	8771	XMR (C=I)	2143	0.0108	0.0277419	0.69814	1.81255e-05	4.1854e-05	8.36758e-05	0.000271905	0.0830896	160.441	0.0748676	5e-05	7.25233e-07
23098	1747_5	Weight	Hair colour (natural	413194	8658	XMR (C=I)	2052	0.0115	0.0285305	0.68576	1.44328e-05	4.1399e-05	8.32239e-05	0.000253791	0.0808513	160.121	0.0780318	5e-05	7.28155e-07
23099	1747_5	Body fat percentage	Hair colour (natural	412960	8654	XMR (C=I)	1677	-0.1246	0.068218	0.067849	2.59699e-05	2.85051e-05	6.66664e-05	0.000222241	0.0492384	97.7537	0.0582908	5e-05	7.28331e-07
23100	1747_5	Whole body fat mass	Hair colour (natural	412524	8645	XMR (C=I)	2006	-0.0452	0.0649768	0.48628	2.26835e-05	4.01151e-05	7.38796e-05	0.000282481	0.0513699	104.483	0.0520851	5e-05	7.28357e-07
23101	1747_5	Whole body fat-free mass	Hair colour (natural	413158	8658	XMR (C=I)	2315	-0.0057	0.0299185	0.84801	1.81697e-05	5.57751e-05	0.000100433	0.000301295	0.120468	227.148	0.0981202	5e-05	7.28302e-07
23102	1747_5	Whole body water mass	Hair colour (natural	413190	8658	XMR (C=I)	2269	0.0121	0.0303379	0.69106	1.54361e-05	5.31023e-05	9.62493e-05	0.000295655	0.121013	231.355	0.101963	5e-05	7.28171e-07
23105	1747_5	Basal metabolic rate	Hair colour (natural	413178	8658	XMR (C=I)	2278	0.013	0.0325729	0.68911	1.68142e-05	4.83242e-05	8.51477e-05	0.000307998	0.118903	231.468	0.10161	5e-05	7.2822e-07
23106	1747_5	Impedance of whole body	Hair colour (natural	413153	8654	XMR (C=I)	2007	-0.0581	0.0418458	0.16526	8.69744e-06	4.0067e-05	8.21878e-05	0.000230541	0.098616	202.212	0.100753	5e-05	7.27545e-07
23109	1747_5	Impedance of arm (right)	Hair colour (natural	413141	8658	XMR (C=I)	1967	-0.0682	0.04285	0.11154	1.41784e-05	3.07619e-05	7.35095e-05	0.000210001	0.10239	198.519	0.100925	5e-05	7.28371e-07
23110	1747_5	Impedance of arm (left)	Hair colour (natural	413157	8658	XMR (C=I)	1822	-0.114	0.0398752	0.0042628	1.31889e-05	2.49829e-05	6.29249e-05	0.000176709	0.107703	223.114	0.122456	5e-05	7.28306e-07
23113	1747_5	Leg fat-free mass (right)	Hair colour (natural	413147	8658	XMR (C=I)	2200	-0.0118	0.0367417	0.74734	1.20079e-05	5.17287e-05	8.829e-05	0.00033317	0.111985	209.701	0.0953186	5e-05	7.28346e-07
23114	1747_5	Leg predicted mass (right)	Hair colour (natural	413146	8658	XMR (C=I)	2230	-0.0096	0.0350395	0.78381	1.11409e-05	4.96804e-05	8.20462e-05	0.000336169	0.116026	222.845	0.0999307	5e-05	7.2835e-07
23117	1747_5	Leg fat-free mass (left)	Hair colour (natural	413118	8658	XMR (C=I)	2237	-0.0299	0.0402392	0.45764	1.22105e-05	4.83168e-05	8.33223e-05	0.000314807	0.110097	214.712	0.0959822	5e-05	7.28464e-07
23118	1747_5	Leg predicted mass (left)	Hair colour (natural	413113	8658	XMR (C=I)	2150	-0.0352	0.0412171	0.39344	1.30878e-05	5.17297e-05	9.04961e-05	0.00030287	0.103877	202.128	0.0940132	5e-05	7.28485e-07
23119	1747_5	Arm fat percentage (right)	Hair colour (natural	413107	8658	XMR (C=I)	1636	-0.1149	0.0655801	0.079693	2.48214e-05	3.40898e-05	7.89111e-05	0.000253062	0.0487038	87.4092	0.0534286	5e-05	7.28509e-07
23120	1747_5	Arm fat mass (right)	Hair colour (natural	413080	8658	XMR (C=I)	1800	-0.031	0.0650996	0.63364	1.61917e-05	4.62804e-05	8.52591e-05	0.000260053	0.0450154	92.5067	0.0513926	5e-05	7.28619e-07
23121	1747_5	Arm fat-free mass (right)	Hair colour (natural	413074	8658	XMR (C=I)	2082	0.0375	0.0384401	0.32956	1.48224e-05	4.3328e-05	8.25773e-05	0.000287974	0.10297	198.41	0.0952979	5e-05	7.28644e-07
23122	1747_5	Arm predicted mass (right)	Hair colour (natural	413067	8657	XMR (C=I)	2077	0.0328	0.0417223	0.4321	1.998e-05	5.53262e-05	9.93012e-05	0.000271139	0.0941461	188.567	0.0907882	5e-05	7.28478e-07
23123	1747_5	Arm fat percentage (left)	Hair colour (natural	413046	8657	XMR (C=I)	1640	-0.1093	0.0674954	0.10531	2.99805e-05	3.78393e-05	7.91166e-05	0.000260315	0.0472181	90.6028	0.0552456	5e-05	7.28563e-07
23124	1747_5	Arm fat mass (left)	Hair colour (natural	413007	8656	XMR (C=I)	1827	-0.0528	0.0655548	0.42095	1.52891e-05	4.29969e-05	8.50406e-05	0.00026442	0.0527649	102.382	0.0560383	5e-05	7.28528e-07
23125	1747_5	Arm fat-free mass (left)	Hair colour (natural	412998	8655	XMR (C=I)	2099	0.0406	0.0421459	0.33558	1.87677e-05	5.02145e-05	8.76502e-05	0.000283162	0.0999567	203.617	0.0970065	5e-05	7.2837e-07
23126	1747_5	Arm predicted mass (left)	Hair colour (natural	412983	8654	XMR (C=I)	2116	0.0347	0.0392248	0.3759	2.04633e-05	4.98087e-05	8.69139e-05	0.000300277	0.0963549	189.827	0.0897105	5e-05	7.28237e-07
23129	1747_5	Trunk fat-free mass	Hair colour (natural	412844	8652	XMR (C=I)	2183	0.0113	0.0319041	0.72264	1.89744e-05	6.49816e-05	0.000110794	0.000290406	0.110939	217.065	0.0994343	5e-05	7.28414e-07
23130	1747_5	Trunk predicted mass	Hair colour (natural	412802	8649	XMR (C=I)	2170	0.0066	0.0268715	0.80639	1.88212e-05	6.6403e-05	0.000112685	0.00029371	0.109517	212.964	0.09814	5e-05	7.28002e-07
30100	1747_5	Mean platelet (thrombocyte) volume	Hair colour (natural	407987	8532	XMR (C=I)	1651	-0.0258	0.0269206	0.33724	1.09117e-05	0.000135393	0.000190582	0.0004345	0.204375	318.427	0.192869	5e-05	7.24835e-07
30300	1747_5	High light scatter reticulocyte count	Hair colour (natural	401345	8315	XMR (C=I)	1337	0.0472	0.045272	0.29682	2.49713e-05	0.000105364	0.000138188	0.000343711	0.0860503	168.108	0.125735	5e-05	7.09298e-07
3062	1747_5	Forced vital capacity (FVC)	Hair colour (natural	383471	8080	XMR (C=I)	1359	0.0642	0.0600461	0.28534	3.49461e-05	4.93441e-05	8.34392e-05	0.000272735	0.0521398	108.77	0.0800371	5e-05	7.3755e-07
3063	1747_5	Forced expiratory volume in 1-second (FEV1)	Hair colour (natural	383471	8080	XMR (C=I)	1268	0.102	0.0673476	0.12972	4.93891e-05	4.50594e-05	8.3428e-05	0.000254842	0.0488557	98.6769	0.0778209	5e-05	7.3755e-07
3064	1747_5	Peak expiratory flow (PEF)	Hair colour (natural	383471	8080	XMR (C=I)	666	-0.0781	0.140068	0.57709	3.34368e-05	3.41539e-05	6.32091e-05	0.00016011	0.011127	28.681	0.0430645	5e-05	7.3755e-07
50	1747_5	Standing height	Hair colour (natural	419596	8657	XMR (C=I)	2983	-0.0324	0.0234825	0.16773	1.07658e-05	8.33686e-05	0.00012032	0.000365182	0.299608	566.301	0.189843	5e-05	7.02459e-07
51	1747_5	Seated height	Hair colour (natural	419245	8649	XMR (C=I)	1851	0.0203	0.0361326	0.57402	1.06684e-05	7.37395e-05	9.98719e-05	0.000387018	0.125247	233.927	0.126379	5e-05	7.02315e-07
30600	1727	Albumin	Ease of skin tanning	367192	7694	XMR (not correct selection bias)	885	0.0025	0.0229067	0.91377	3.76457e-06	6.42756e-05	6.97569e-05	0.00019486	0.172436	884.912	0.9999	5e-05	1
30870	1727	Triglycerides	Ease of skin tanning	400639	8415	XMR (not correct selection bias)	1157	-0.0503	0.0323019	0.11949	7.74457e-06	6.29408e-05	5.82603e-05	0.000175249	0.202743	1156.88	0.9999	5e-05	1
30890	1727	Vitamin D	Ease of skin tanning	383324	7380	XMR (not correct selection bias)	420	0.0171	0.0698865	0.80638	3.15046e-06	5.7046e-05	1.88214e-05	0.000112093	0.0470718	419.958	0.9999	5e-05	1
20015	1727	Sitting height	Ease of skin tanning	419233	8649	XMR (not correct selection bias)	2620	-0.052	0.0191922	0.0066935	4.69791e-06	6.43934e-05	6.27966e-05	0.000210065	0.550384	2619.74	0.9999	5e-05	1
21002	1727	Weight	Ease of skin tanning	419316	8771	XMR (not correct selection bias)	2143	-0.0049	0.0200125	0.80598	6.05045e-06	5.07871e-05	5.31407e-05	0.00017851	0.382513	2142.79	0.9999	5e-05	1
23098	1727	Weight	Ease of skin tanning	413194	8658	XMR (not correct selection bias)	2052	-0.0185	0.0232394	0.42648	5.27745e-06	5.18772e-05	5.44572e-05	0.000183362	0.37623	2051.79	0.9999	5e-05	1
23099	1727	Body fat percentage	Ease of skin tanning	412960	8654	XMR (not correct selection bias)	1677	0.0182	0.0273832	0.50605	5.16491e-06	4.89253e-05	4.6132e-05	0.000166397	0.279023	1676.83	0.9999	5e-05	1
23100	1727	Whole body fat mass	Ease of skin tanning	412524	8645	XMR (not correct selection bias)	2006	-0.001	0.00918736	0.90981	5.19535e-06	4.93202e-05	4.69788e-05	0.0001649	0.330755	2005.8	0.9999	5e-05	1
23101	1727	Whole body fat-free mass	Ease of skin tanning	413158	8658	XMR (not correct selection bias)	2315	0.0117	0.0208375	0.57548	6.60954e-06	5.52288e-05	5.66588e-05	0.000193282	0.447389	2314.77	0.9999	5e-05	1
23102	1727	Whole body water mass	Ease of skin tanning	413190	8658	XMR (not correct selection bias)	2269	0.0167	0.0214299	0.43552	8.28583e-06	5.5373e-05	5.84106e-05	0.000195232	0.442925	2268.77	0.9999	5e-05	1
23105	1727	Basal metabolic rate	Ease of skin tanning	413178	8658	XMR (not correct selection bias)	2278	0.0126	0.0212979	0.55346	9.21e-06	5.47867e-05	5.65237e-05	0.00019397	0.441811	2277.77	0.9999	5e-05	1
23106	1727	Impedance of whole body	Ease of skin tanning	413153	8654	XMR (not correct selection bias)	2007	-0.0406	0.0231638	0.079773	3.20031e-06	5.34371e-05	5.64038e-05	0.000187216	0.375708	2006.8	0.9999	5e-05	1
23109	1727	Impedance of arm (right)	Ease of skin tanning	413141	8658	XMR (not correct selection bias)	1967	-0.0432	0.0247034	0.080577	7.15895e-06	5.18502e-05	5.07426e-05	0.000177626	0.349354	1966.8	0.9999	5e-05	1
23110	1727	Impedance of arm (left)	Ease of skin tanning	413157	8658	XMR (not correct selection bias)	1822	-0.0528	0.0254826	0.038317	4.09324e-06	5.2068e-05	5.61033e-05	0.000172342	0.313975	1821.82	0.9999	5e-05	1
23113	1727	Leg fat-free mass (right)	Ease of skin tanning	413147	8658	XMR (not correct selection bias)	2200	0.0229	0.0225033	0.30965	5.9648e-06	5.43645e-05	5.18963e-05	0.000186844	0.41101	2199.78	0.9999	5e-05	1
23114	1727	Leg predicted mass (right)	Ease of skin tanning	413146	8658	XMR (not correct selection bias)	2230	0.0317	0.0222102	0.15371	4.98524e-06	5.48485e-05	5.27548e-05	0.000187516	0.418119	2229.78	0.9999	5e-05	1
23117	1727	Leg fat-free mass (left)	Ease of skin tanning	413118	8658	XMR (not correct selection bias)	2237	-0.0035	0.0172219	0.84088	6.27693e-06	5.39346e-05	5.18753e-05	0.000187846	0.420171	2236.78	0.9999	5e-05	1
23118	1727	Leg predicted mass (left)	Ease of skin tanning	413113	8658	XMR (not correct selection bias)	2150	0.0161	0.0223719	0.4723	4.98456e-06	5.44625e-05	5.57982e-05	0.000186055	0.399971	2149.78	0.9999	5e-05	1
23119	1727	Arm fat percentage (right)	Ease of skin tanning	413107	8658	XMR (not correct selection bias)	1636	0.0713	0.0281708	0.011422	4.08942e-06	4.85853e-05	4.6108e-05	0.000164388	0.268912	1635.84	0.9999	5e-05	1
23120	1727	Arm fat mass (right)	Ease of skin tanning	413080	8658	XMR (not correct selection bias)	1800	0.0406	0.0275579	0.14045	5.40562e-06	4.97143e-05	4.75621e-05	0.000158828	0.285861	1799.82	0.9999	5e-05	1
23121	1727	Arm fat-free mass (right)	Ease of skin tanning	413074	8658	XMR (not correct selection bias)	2082	-0.0017	0.0129828	0.8973	1.03334e-05	5.36612e-05	5.42616e-05	0.000188668	0.392771	2081.79	0.9999	5e-05	1
23122	1727	Arm predicted mass (right)	Ease of skin tanning	413067	8657	XMR (not correct selection bias)	2077	0.0241	0.0220242	0.27468	5.34393e-06	5.46864e-05	5.7925e-05	0.000197424	0.410005	2076.79	0.9999	5e-05	1
23123	1727	Arm fat percentage (left)	Ease of skin tanning	413046	8657	XMR (not correct selection bias)	1640	0.0805	0.0282048	0.0043093	7.68949e-06	4.88722e-05	4.8938e-05	0.000167752	0.275086	1639.84	0.9999	5e-05	1
23124	1727	Arm fat mass (left)	Ease of skin tanning	413007	8656	XMR (not correct selection bias)	1827	0.0348	0.0271452	0.19922	7.53607e-06	4.99378e-05	4.96686e-05	0.00016289	0.297579	1826.82	0.9999	5e-05	1
23125	1727	Arm fat-free mass (left)	Ease of skin tanning	412998	8655	XMR (not correct selection bias)	2099	0.0111	0.0220373	0.61444	5.94682e-06	5.49096e-05	5.72827e-05	0.000187596	0.393714	2098.79	0.9999	5e-05	1
23126	1727	Arm predicted mass (left)	Ease of skin tanning	412983	8654	XMR (not correct selection bias)	2116	0.0035	0.0175114	0.84301	5.25529e-06	5.37668e-05	5.78238e-05	0.000189992	0.40198	2115.79	0.9999	5e-05	1
23129	1727	Trunk fat-free mass	Ease of skin tanning	412844	8652	XMR (not correct selection bias)	2183	-0.009	0.0209157	0.66583	9.41478e-06	5.70864e-05	6.15026e-05	0.000198328	0.432916	2182.78	0.9999	5e-05	1
23130	1727	Trunk predicted mass	Ease of skin tanning	412802	8649	XMR (not correct selection bias)	2170	-0.0078	0.0206264	0.707	1.08232e-05	5.70519e-05	6.16845e-05	0.000199512	0.432906	2169.78	0.9999	5e-05	1
30100	1727	Mean platelet (thrombocyte) volume	Ease of skin tanning	407987	8532	XMR (not correct selection bias)	1651	0.0115	0.0214914	0.59169	4.65686e-06	8.57596e-05	8.58344e-05	0.000240575	0.397157	1650.83	0.9999	5e-05	1
30300	1727	High light scatter reticulocyte count	Ease of skin tanning	401345	8315	XMR (not correct selection bias)	1337	0.0322	0.0288688	0.26432	5.39756e-06	6.76632e-05	6.53193e-05	0.000185197	0.2476	1336.87	0.9999	5e-05	1
3062	1727	Forced vital capacity (FVC)	Ease of skin tanning	383471	8080	XMR (not correct selection bias)	1359	-0.0842	0.0299694	0.0049401	3.31205e-06	5.64712e-05	4.46981e-05	0.00017811	0.242074	1358.86	0.9999	5e-05	1
3063	1727	Forced expiratory volume in 1-second (FEV1)	Ease of skin tanning	383471	8080	XMR (not correct selection bias)	1268	-0.095	0.0318389	0.0028458	5.85743e-06	5.51218e-05	4.54552e-05	0.000174217	0.220954	1267.87	0.9999	5e-05	1
3064	1727	Peak expiratory flow (PEF)	Ease of skin tanning	383471	8080	XMR (not correct selection bias)	666	-0.1413	0.0494819	0.0043072	1.81009e-06	5.17168e-05	3.5163e-05	0.000138934	0.0925207	665.933	0.9999	5e-05	1
50	1727	Standing height	Ease of skin tanning	419596	8657	XMR (not correct selection bias)	2983	-0.0803	0.0166289	1.3675e-06	4.02492e-06	7.07181e-05	7.28042e-05	0.000236063	0.704104	2982.7	0.999899	5e-05	1
51	1727	Seated height	Ease of skin tanning	419245	8649	XMR (not correct selection bias)	1851	-0.0473	0.0239887	0.048466	4.23212e-06	6.08167e-05	5.62468e-05	0.000192767	0.356834	1850.81	0.9999	5e-05	1
30600	1747_5	Albumin	Hair colour (natural	367192	7694	XMR (not correct selection bias)	885	-0.0069	0.0295185	0.81444	4.64666e-06	6.42812e-05	6.97791e-05	0.000194837	0.172407	884.912	0.9999	5e-05	1
30870	1747_5	Triglycerides	Hair colour (natural	400639	8415	XMR (not correct selection bias)	1157	-0.0829	0.0312292	0.00793	1.33821e-05	6.29525e-05	5.83116e-05	0.000175129	0.202604	1156.88	0.9999	5e-05	1
30890	1747_5	Vitamin D	Hair colour (natural	383324	7380	XMR (not correct selection bias)	420	-0.0893	0.0685841	0.19299	1.67356e-06	5.70399e-05	1.88688e-05	0.000112291	0.0471577	419.958	0.9999	5e-05	1
20015	1747_5	Sitting height	Hair colour (natural	419233	8649	XMR (not correct selection bias)	2620	-0.0395	0.0176818	0.025447	4.13667e-06	6.43968e-05	6.27436e-05	0.000210185	0.550629	2619.74	0.9999	5e-05	1
21002	1747_5	Weight	Hair colour (natural	419316	8771	XMR (not correct selection bias)	2143	-0.0111	0.0211348	0.59853	6.61164e-06	5.07934e-05	5.31723e-05	0.000178424	0.382345	2142.79	0.9999	5e-05	1
23098	1747_5	Weight	Hair colour (natural	413194	8658	XMR (not correct selection bias)	2052	0.007	0.0202495	0.73011	6.77904e-06	5.18889e-05	5.45403e-05	0.000183279	0.376035	2051.79	0.9999	5e-05	1
23099	1747_5	Body fat percentage	Hair colour (natural	412960	8654	XMR (not correct selection bias)	1677	-0.0601	0.0258763	0.020191	5.20183e-06	4.89203e-05	4.6149e-05	0.000166387	0.279004	1676.83	0.9999	5e-05	1
23100	1747_5	Whole body fat mass	Hair colour (natural	412524	8645	XMR (not correct selection bias)	2006	-0.0289	0.0235814	0.22039	4.01406e-06	4.93201e-05	4.69804e-05	0.000164876	0.330729	2005.8	0.9999	5e-05	1
23101	1747_5	Whole body fat-free mass	Hair colour (natural	413158	8658	XMR (not correct selection bias)	2315	-0.0041	0.0167266	0.80574	4.21575e-06	5.52278e-05	5.66383e-05	0.000193314	0.447479	2314.77	0.9999	5e-05	1
23102	1747_5	Whole body water mass	Hair colour (natural	413190	8658	XMR (not correct selection bias)	2269	0.0059	0.0178407	0.74227	3.51902e-06	5.53715e-05	5.83993e-05	0.000195267	0.443012	2268.77	0.9999	5e-05	1
23105	1747_5	Basal metabolic rate	Hair colour (natural	413178	8658	XMR (not correct selection bias)	2278	0.0086	0.0189837	0.64882	4.37789e-06	5.47883e-05	5.65607e-05	0.000193957	0.441778	2277.77	0.9999	5e-05	1
23106	1747_5	Impedance of whole body	Hair colour (natural	413153	8654	XMR (not correct selection bias)	2007	-0.0181	0.0212416	0.39464	2.8644e-06	5.34326e-05	5.63959e-05	0.000187231	0.375738	2006.8	0.9999	5e-05	1
23109	1747_5	Impedance of arm (right)	Hair colour (natural	413141	8658	XMR (not correct selection bias)	1967	-0.0232	0.0223912	0.29954	2.98954e-06	5.18463e-05	5.07318e-05	0.000177629	0.349357	1966.8	0.9999	5e-05	1
23110	1747_5	Impedance of arm (left)	Hair colour (natural	413157	8658	XMR (not correct selection bias)	1822	-0.045	0.0234537	0.055101	2.69161e-06	5.20623e-05	5.61024e-05	0.00017235	0.31399	1821.82	0.9999	5e-05	1
23113	1747_5	Leg fat-free mass (right)	Hair colour (natural	413147	8658	XMR (not correct selection bias)	2200	-0.0036	0.0166616	0.82993	3.69291e-06	5.43671e-05	5.1914e-05	0.000186866	0.411069	2199.78	0.9999	5e-05	1
23114	1747_5	Leg predicted mass (right)	Hair colour (natural	413146	8658	XMR (not correct selection bias)	2230	-0.0058	0.0184205	0.75473	4.06721e-06	5.48492e-05	5.27672e-05	0.000187589	0.418286	2229.78	0.9999	5e-05	1
23117	1747_5	Leg fat-free mass (left)	Hair colour (natural	413118	8658	XMR (not correct selection bias)	2237	-0.034	0.0205288	0.097528	3.62158e-06	5.39349e-05	5.18738e-05	0.000187914	0.420323	2236.78	0.9999	5e-05	1
23118	1747_5	Leg predicted mass (left)	Hair colour (natural	413113	8658	XMR (not correct selection bias)	2150	-0.0197	0.0207889	0.34426	3.34715e-06	5.4462e-05	5.57929e-05	0.000186071	0.400027	2149.78	0.9999	5e-05	1
23119	1747_5	Arm fat percentage (right)	Hair colour (natural	413107	8658	XMR (not correct selection bias)	1636	-0.0139	0.0255066	0.58508	4.08773e-06	4.85829e-05	4.61578e-05	0.000164308	0.268794	1635.84	0.9999	5e-05	1
23120	1747_5	Arm fat mass (right)	Hair colour (natural	413080	8658	XMR (not correct selection bias)	1800	-0.0524	0.025453	0.039477	4.11112e-06	4.97184e-05	4.75237e-05	0.00015897	0.286117	1799.82	0.9999	5e-05	1
23121	1747_5	Arm fat-free mass (right)	Hair colour (natural	413074	8658	XMR (not correct selection bias)	2082	0.0132	0.0208854	0.52796	5.27975e-06	5.3661e-05	5.42235e-05	0.000188676	0.392786	2081.79	0.9999	5e-05	1
23122	1747_5	Arm predicted mass (right)	Hair colour (natural	413067	8657	XMR (not correct selection bias)	2077	0.0069	0.0193131	0.71959	6.10652e-06	5.46845e-05	5.78706e-05	0.000197408	0.409973	2076.79	0.9999	5e-05	1
23123	1747_5	Arm fat percentage (left)	Hair colour (natural	413046	8657	XMR (not correct selection bias)	1640	-0.0342	0.0259866	0.18832	5.65412e-06	4.88684e-05	4.89946e-05	0.000167737	0.275074	1639.84	0.9999	5e-05	1
23124	1747_5	Arm fat mass (left)	Hair colour (natural	413007	8656	XMR (not correct selection bias)	1827	-0.0328	0.0252351	0.19431	7.15466e-06	4.9941e-05	4.97011e-05	0.000162901	0.297616	1826.82	0.9999	5e-05	1
23125	1747_5	Arm fat-free mass (left)	Hair colour (natural	412998	8655	XMR (not correct selection bias)	2099	0.0111	0.0205773	0.58921	5.49913e-06	5.49113e-05	5.72711e-05	0.000187575	0.393673	2098.79	0.9999	5e-05	1
23126	1747_5	Arm predicted mass (left)	Hair colour (natural	412983	8654	XMR (not correct selection bias)	2116	0.0044	0.0179819	0.80767	5.97111e-06	5.37715e-05	5.78371e-05	0.000189968	0.40193	2115.79	0.9999	5e-05	1
23129	1747_5	Trunk fat-free mass	Hair colour (natural	412844	8652	XMR (not correct selection bias)	2183	0.0238	0.0198017	0.2292	3.78206e-06	5.70912e-05	6.15009e-05	0.000198381	0.433023	2182.78	0.9999	5e-05	1
23130	1747_5	Trunk predicted mass	Hair colour (natural	412802	8649	XMR (not correct selection bias)	2170	0.0257	0.019881	0.19555	4.62231e-06	5.70569e-05	6.16822e-05	0.000199563	0.433008	2169.78	0.9999	5e-05	1
30100	1747_5	Mean platelet (thrombocyte) volume	Hair colour (natural	407987	8532	XMR (not correct selection bias)	1651	-0.0147	0.0201334	0.46537	4.1412e-06	8.57719e-05	8.58574e-05	0.000240548	0.3971	1650.83	0.9999	5e-05	1
30300	1747_5	High light scatter reticulocyte count	Hair colour (natural	401345	8315	XMR (not correct selection bias)	1337	0.0314	0.0269063	0.2428	7.34904e-06	6.76701e-05	6.548e-05	0.000185012	0.247335	1336.87	0.9999	5e-05	1
3062	1747_5	Forced vital capacity (FVC)	Hair colour (natural	383471	8080	XMR (not correct selection bias)	1359	0.0623	0.0279151	0.025565	5.479e-06	5.64394e-05	4.46779e-05	0.000178178	0.24212	1358.86	0.9999	5e-05	1
3063	1747_5	Forced expiratory volume in 1-second (FEV1)	Hair colour (natural	383471	8080	XMR (not correct selection bias)	1268	0.0415	0.0299099	0.16552	1.00735e-05	5.51084e-05	4.56065e-05	0.000174253	0.220931	1267.87	0.9999	5e-05	1
3064	1747_5	Peak expiratory flow (PEF)	Hair colour (natural	383471	8080	XMR (not correct selection bias)	666	-0.0123	0.045707	0.78746	8.29015e-06	5.17212e-05	3.50534e-05	0.000139043	0.0925938	665.933	0.9999	5e-05	1
50	1747_5	Standing height	Hair colour (natural	419596	8657	XMR (not correct selection bias)	2983	0.0163	0.0152364	0.286	5.15507e-06	7.07178e-05	7.27007e-05	0.000236162	0.704399	2982.7	0.999899	5e-05	1
51	1747_5	Seated height	Hair colour (natural	419245	8649	XMR (not correct selection bias)	1851	0.017	0.0219243	0.43796	3.93796e-06	6.08177e-05	5.61894e-05	0.00019289	0.357018	1850.81	0.9999	5e-05	1

## Sheet: Table S13-nc CSA results4-CAUSE
Table S13	Results of negative control study in Central/South Asians by CAUSE under other three IV selection thresholds (1e-3, 1e-4, 1e-5)
column description:
exposure: phecode of the exposure
outcome: phecode of the outcome
exposure_name: description of the exposure
outcome_name: description of the outcome
Threshold: IV selection threshold
nIV: number of IVs used
beta: causal effect estimate by CAUSE
beta.se: standard error of the causal effect estimate by CAUSE
beta.pvalue: p-value of the causal effect estimate by CAUSE
exposure	outcome	exposure_name	outcome_name	Threshold	nIV	beta	beta.se	beta.pvalue
50	1727	Standing height	Ease of skin tanning	1e-05	14	-0.0193891	0.12345	0.999853
50	1727	Standing height	Ease of skin tanning	0.0001	79	2.70964e-15	0.278292	NA
50	1727	Standing height	Ease of skin tanning	0.001	438	-1.32845e-14	0.469111	0.00899776
50	1747_5	Standing height	Hair colour (natural	1e-05	14	-0.0254379	0.119057	0.999815
50	1747_5	Standing height	Hair colour (natural	0.0001	79	0.0998019	0.0894065	0.511166
50	1747_5	Standing height	Hair colour (natural	0.001	438	0.159657	0.0782447	0.225135
51	1727	Seated height	Ease of skin tanning	1e-05	6	-5.23886e-16	0.211786	NA
51	1727	Seated height	Ease of skin tanning	0.0001	61	-1.13798e-15	0.441346	NA
51	1727	Seated height	Ease of skin tanning	0.001	387	1.50574e-15	0.460516	0.897225
51	1747_5	Seated height	Hair colour (natural	1e-05	6	0.0121427	0.148264	1
51	1747_5	Seated height	Hair colour (natural	0.0001	61	0.0821081	0.13088	0.881326
51	1747_5	Seated height	Hair colour (natural	0.001	387	0.181167	0.113679	0.352566
3062	1727	Forced vital capacity (FVC)	Ease of skin tanning	1e-05	7	-0.00338802	0.239218	0.998503
3062	1727	Forced vital capacity (FVC)	Ease of skin tanning	0.0001	57	0.0647904	0.421359	0.907202
3062	1727	Forced vital capacity (FVC)	Ease of skin tanning	0.001	416	-0.00516678	0.309344	1
3062	1747_5	Forced vital capacity (FVC)	Hair colour (natural	1e-05	7	0.00912354	0.189284	0.786619
3062	1747_5	Forced vital capacity (FVC)	Hair colour (natural	0.0001	57	0.0697292	0.433019	0.984295
3062	1747_5	Forced vital capacity (FVC)	Hair colour (natural	0.001	416	-0.141225	0.28452	0.859343
3063	1727	Forced expiratory volume in 1-second (FEV1)	Ease of skin tanning	1e-05	9	-0.0542849	0.243924	0.049041
3063	1727	Forced expiratory volume in 1-second (FEV1)	Ease of skin tanning	0.0001	61	0.108426	0.342244	0.787947
3063	1727	Forced expiratory volume in 1-second (FEV1)	Ease of skin tanning	0.001	400	-0.150506	0.352907	0.86146
3063	1747_5	Forced expiratory volume in 1-second (FEV1)	Hair colour (natural	1e-05	9	0.0052879	0.187296	0.994989
3063	1747_5	Forced expiratory volume in 1-second (FEV1)	Hair colour (natural	0.0001	61	-0.114403	0.242449	0.212104
3063	1747_5	Forced expiratory volume in 1-second (FEV1)	Hair colour (natural	0.001	400	-0.331888	0.256493	0.261107
3064	1727	Peak expiratory flow (PEF)	Ease of skin tanning	1e-05	12	1.19002e-15	0.247829	NA
3064	1727	Peak expiratory flow (PEF)	Ease of skin tanning	0.0001	67	-0.0277126	0.170406	0.995858
3064	1727	Peak expiratory flow (PEF)	Ease of skin tanning	0.001	401	-6.4948e-15	0.545978	0.996885
3064	1747_5	Peak expiratory flow (PEF)	Hair colour (natural	1e-05	12	-0.0536877	0.113679	0.699045
3064	1747_5	Peak expiratory flow (PEF)	Hair colour (natural	0.0001	67	-0.0876065	0.154118	0.873917
3064	1747_5	Peak expiratory flow (PEF)	Hair colour (natural	0.001	401	-0.0848361	0.136207	0.848067
20015	1727	Sitting height	Ease of skin tanning	1e-05	9	2.02876e-15	0.197581	0.5
20015	1727	Sitting height	Ease of skin tanning	0.0001	72	-8.06299e-15	0.404285	NA
20015	1727	Sitting height	Ease of skin tanning	0.001	446	1.69066e-14	0.531861	0.61837
20015	1747_5	Sitting height	Hair colour (natural	1e-05	9	-0.00503573	0.127621	1
20015	1747_5	Sitting height	Hair colour (natural	0.0001	72	0.0605227	0.112294	0.885228
20015	1747_5	Sitting height	Hair colour (natural	0.001	446	0.0463542	0.0810462	0.88707
21002	1727	Weight	Ease of skin tanning	1e-05	9	-0.00713014	0.185197	1
21002	1727	Weight	Ease of skin tanning	0.0001	58	0.0682055	0.300227	0.972943
21002	1727	Weight	Ease of skin tanning	0.001	406	0.0462396	0.275847	1
21002	1747_5	Weight	Hair colour (natural	1e-05	9	-0.0128494	0.172994	0.999703
21002	1747_5	Weight	Hair colour (natural	0.0001	58	-0.0390811	0.221293	0.999975
21002	1747_5	Weight	Hair colour (natural	0.001	406	-0.130626	0.218928	0.89309
23098	1727	Weight	Ease of skin tanning	1e-05	8	0.0197367	0.247869	0.952353
23098	1727	Weight	Ease of skin tanning	0.0001	60	0.0797155	0.366406	0.952109
23098	1727	Weight	Ease of skin tanning	0.001	403	-0.0363532	0.25332	1
23098	1747_5	Weight	Hair colour (natural	1e-05	8	-0.0184623	0.138221	0.582081
23098	1747_5	Weight	Hair colour (natural	0.0001	60	-0.0616842	0.212483	0.915711
23098	1747_5	Weight	Hair colour (natural	0.001	403	-0.0706584	0.215806	0.997707
23099	1727	Body fat percentage	Ease of skin tanning	1e-05	10	0.00568924	0.186105	1
23099	1727	Body fat percentage	Ease of skin tanning	0.0001	51	-0.00670069	0.300067	0.999997
23099	1727	Body fat percentage	Ease of skin tanning	0.001	403	0.154208	0.374027	0.961419
23099	1747_5	Body fat percentage	Hair colour (natural	1e-05	10	-0.492176	0.350258	0.108993
23099	1747_5	Body fat percentage	Hair colour (natural	0.0001	51	-0.475466	0.352183	0.0809708
23099	1747_5	Body fat percentage	Hair colour (natural	0.001	403	-0.0281628	0.256077	1
23100	1727	Whole body fat mass	Ease of skin tanning	1e-05	4	-0.0307198	0.26816	0.482047
23100	1727	Whole body fat mass	Ease of skin tanning	0.0001	42	0.318487	0.422681	0.170799
23100	1727	Whole body fat mass	Ease of skin tanning	0.001	414	-0.0300793	0.357883	1
23100	1747_5	Whole body fat mass	Hair colour (natural	1e-05	4	-0.0163975	0.175135	0.334996
23100	1747_5	Whole body fat mass	Hair colour (natural	0.0001	42	-0.0788062	0.259591	0.523421
23100	1747_5	Whole body fat mass	Hair colour (natural	0.001	414	-0.344257	0.280175	0.40583
23101	1727	Whole body fat-free mass	Ease of skin tanning	1e-05	8	0.0271641	0.160947	0.958698
23101	1727	Whole body fat-free mass	Ease of skin tanning	0.0001	58	0.139893	0.177461	0.536573
23101	1727	Whole body fat-free mass	Ease of skin tanning	0.001	420	-0.132433	0.150599	0.65941
23101	1747_5	Whole body fat-free mass	Hair colour (natural	1e-05	8	-0.00741046	0.145823	1
23101	1747_5	Whole body fat-free mass	Hair colour (natural	0.0001	58	0.0321407	0.206094	1
23101	1747_5	Whole body fat-free mass	Hair colour (natural	0.001	420	0.0539459	0.131328	0.983798
23102	1727	Whole body water mass	Ease of skin tanning	1e-05	9	0.0391641	0.160856	0.752201
23102	1727	Whole body water mass	Ease of skin tanning	0.0001	58	0.113922	0.159394	0.4999
23102	1727	Whole body water mass	Ease of skin tanning	0.001	418	-0.100225	0.151928	0.793513
23102	1747_5	Whole body water mass	Hair colour (natural	1e-05	9	-0.00480517	0.145387	1
23102	1747_5	Whole body water mass	Hair colour (natural	0.0001	58	0.0984873	0.205022	0.904202
23102	1747_5	Whole body water mass	Hair colour (natural	0.001	418	0.104655	0.13015	0.763335
23105	1727	Basal metabolic rate	Ease of skin tanning	1e-05	8	0.0281906	0.159863	0.96531
23105	1727	Basal metabolic rate	Ease of skin tanning	0.0001	63	-0.114768	0.253169	0.833004
23105	1727	Basal metabolic rate	Ease of skin tanning	0.001	428	-0.138933	0.165756	0.758147
23105	1747_5	Basal metabolic rate	Hair colour (natural	1e-05	8	-0.00675693	0.145518	1
23105	1747_5	Basal metabolic rate	Hair colour (natural	0.0001	63	-0.0640569	0.191124	0.980048
23105	1747_5	Basal metabolic rate	Hair colour (natural	0.001	428	-0.0370429	0.141325	0.999815
23106	1727	Impedance of whole body	Ease of skin tanning	1e-05	7	-0.00245228	0.113884	0.87203
23106	1727	Impedance of whole body	Ease of skin tanning	0.0001	52	-0.0783766	0.28193	0.709439
23106	1727	Impedance of whole body	Ease of skin tanning	0.001	419	-0.514956	0.341632	0.234462
23106	1747_5	Impedance of whole body	Hair colour (natural	1e-05	7	0.0354969	0.201947	0.271594
23106	1747_5	Impedance of whole body	Hair colour (natural	0.0001	52	0.0244452	0.234253	0.97438
23106	1747_5	Impedance of whole body	Hair colour (natural	0.001	419	0.296017	0.250026	0.31935
23109	1727	Impedance of arm (right)	Ease of skin tanning	1e-05	5	0.00670021	0.135854	0.885346
23109	1727	Impedance of arm (right)	Ease of skin tanning	0.0001	48	0.012355	0.272113	0.98826
23109	1727	Impedance of arm (right)	Ease of skin tanning	0.001	399	-0.0364935	0.368164	1
23109	1747_5	Impedance of arm (right)	Hair colour (natural	1e-05	5	0.00391461	0.0782825	0.936979
23109	1747_5	Impedance of arm (right)	Hair colour (natural	0.0001	48	-0.00856695	0.288991	1
23109	1747_5	Impedance of arm (right)	Hair colour (natural	0.001	399	-0.246888	0.337774	0.537975
23110	1727	Impedance of arm (left)	Ease of skin tanning	1e-05	NA	NA	NA	NA
23110	1727	Impedance of arm (left)	Ease of skin tanning	0.0001	43	-0.0180237	0.285934	0.978115
23110	1727	Impedance of arm (left)	Ease of skin tanning	0.001	373	0.0290071	0.365822	1
23110	1747_5	Impedance of arm (left)	Hair colour (natural	1e-05	NA	NA	NA	NA
23110	1747_5	Impedance of arm (left)	Hair colour (natural	0.0001	43	-0.0203103	0.386351	0.977376
23110	1747_5	Impedance of arm (left)	Hair colour (natural	0.001	373	0.0872204	0.328732	0.984678
23113	1727	Leg fat-free mass (right)	Ease of skin tanning	1e-05	8	0.0336247	0.157104	0.925798
23113	1727	Leg fat-free mass (right)	Ease of skin tanning	0.0001	62	-0.0345729	0.225497	0.999996
23113	1727	Leg fat-free mass (right)	Ease of skin tanning	0.001	444	7.5287e-16	0.493119	0.0474576
23113	1747_5	Leg fat-free mass (right)	Hair colour (natural	1e-05	8	-0.0466998	0.207086	0.999679
23113	1747_5	Leg fat-free mass (right)	Hair colour (natural	0.0001	62	0.176034	0.217426	0.559299
23113	1747_5	Leg fat-free mass (right)	Hair colour (natural	0.001	444	0.0147601	0.136026	1
23114	1727	Leg predicted mass (right)	Ease of skin tanning	1e-05	9	0.0278105	0.153104	0.950947
23114	1727	Leg predicted mass (right)	Ease of skin tanning	0.0001	63	-0.059107	0.191111	0.985756
23114	1727	Leg predicted mass (right)	Ease of skin tanning	0.001	435	-0.0549849	0.167999	0.992063
23114	1747_5	Leg predicted mass (right)	Hair colour (natural	1e-05	9	-0.0236601	0.201498	1
23114	1747_5	Leg predicted mass (right)	Hair colour (natural	0.0001	63	0.049066	0.185267	0.987457
23114	1747_5	Leg predicted mass (right)	Hair colour (natural	0.001	435	0.0319471	0.146778	0.998371
23117	1727	Leg fat-free mass (left)	Ease of skin tanning	1e-05	6	0.0540104	0.176415	0.481884
23117	1727	Leg fat-free mass (left)	Ease of skin tanning	0.0001	58	-0.118651	0.26723	0.894115
23117	1727	Leg fat-free mass (left)	Ease of skin tanning	0.001	422	-0.110065	0.185587	0.890647
23117	1747_5	Leg fat-free mass (left)	Hair colour (natural	1e-05	6	-0.0302344	0.133224	0.452508
23117	1747_5	Leg fat-free mass (left)	Hair colour (natural	0.0001	58	-0.0504449	0.243241	0.998894
23117	1747_5	Leg fat-free mass (left)	Hair colour (natural	0.001	422	0.135974	0.154297	0.676119
23118	1727	Leg predicted mass (left)	Ease of skin tanning	1e-05	7	0.0515937	0.173236	0.500211
23118	1727	Leg predicted mass (left)	Ease of skin tanning	0.0001	57	-1.5786e-15	0.355337	NA
23118	1727	Leg predicted mass (left)	Ease of skin tanning	0.001	419	0.00129207	0.184833	1
23118	1747_5	Leg predicted mass (left)	Hair colour (natural	1e-05	7	-0.0208345	0.136038	0.850676
23118	1747_5	Leg predicted mass (left)	Hair colour (natural	0.0001	57	0.0565431	0.21397	0.97515
23118	1747_5	Leg predicted mass (left)	Hair colour (natural	0.001	419	0.0806417	0.152885	0.920653
23119	1727	Arm fat percentage (right)	Ease of skin tanning	1e-05	6	0.0132654	0.222973	0.721419
23119	1727	Arm fat percentage (right)	Ease of skin tanning	0.0001	49	0.298567	0.351559	0.13326
23119	1727	Arm fat percentage (right)	Ease of skin tanning	0.001	377	0.0689029	0.354127	0.994999
23119	1747_5	Arm fat percentage (right)	Hair colour (natural	1e-05	6	-0.0364507	0.202484	0.259585
23119	1747_5	Arm fat percentage (right)	Hair colour (natural	0.0001	49	-0.455922	0.324338	0.106796
23119	1747_5	Arm fat percentage (right)	Hair colour (natural	0.001	377	-0.24801	0.252834	0.472491
23120	1727	Arm fat mass (right)	Ease of skin tanning	1e-05	8	0.121505	0.30466	0.187365
23120	1727	Arm fat mass (right)	Ease of skin tanning	0.0001	51	0.370557	0.398197	0.237181
23120	1727	Arm fat mass (right)	Ease of skin tanning	0.001	391	-0.0189693	0.294393	1
23120	1747_5	Arm fat mass (right)	Hair colour (natural	1e-05	8	-0.00859845	0.180318	1
23120	1747_5	Arm fat mass (right)	Hair colour (natural	0.0001	51	-0.0794953	0.238005	0.720454
23120	1747_5	Arm fat mass (right)	Hair colour (natural	0.001	391	-0.385749	0.29525	0.445572
23121	1727	Arm fat-free mass (right)	Ease of skin tanning	1e-05	7	0.0695055	0.235938	0.574577
23121	1727	Arm fat-free mass (right)	Ease of skin tanning	0.0001	53	-0.0705177	0.191628	0.903362
23121	1727	Arm fat-free mass (right)	Ease of skin tanning	0.001	418	-0.194357	0.195279	0.618379
23121	1747_5	Arm fat-free mass (right)	Hair colour (natural	1e-05	7	-0.0286535	0.137689	0.544777
23121	1747_5	Arm fat-free mass (right)	Hair colour (natural	0.0001	53	-0.0151018	0.226763	1
23121	1747_5	Arm fat-free mass (right)	Hair colour (natural	0.001	418	0.0371284	0.16228	0.999288
23122	1727	Arm predicted mass (right)	Ease of skin tanning	1e-05	NA	NA	NA	NA
23122	1727	Arm predicted mass (right)	Ease of skin tanning	0.0001	55	1.71391e-15	0.262245	NA
23122	1727	Arm predicted mass (right)	Ease of skin tanning	0.001	406	3.97599e-15	0.491421	1
23122	1747_5	Arm predicted mass (right)	Hair colour (natural	1e-05	NA	NA	NA	NA
23122	1747_5	Arm predicted mass (right)	Hair colour (natural	0.0001	55	0.0734261	0.256815	0.974594
23122	1747_5	Arm predicted mass (right)	Hair colour (natural	0.001	406	0.0187353	0.17403	1
23123	1727	Arm fat percentage (left)	Ease of skin tanning	1e-05	NA	NA	NA	NA
23123	1727	Arm fat percentage (left)	Ease of skin tanning	0.0001	47	0.267247	0.314532	0.197694
23123	1727	Arm fat percentage (left)	Ease of skin tanning	0.001	397	0.00830365	0.278114	1
23123	1747_5	Arm fat percentage (left)	Hair colour (natural	1e-05	NA	NA	NA	NA
23123	1747_5	Arm fat percentage (left)	Hair colour (natural	0.0001	47	-0.422078	0.365242	0.128873
23123	1747_5	Arm fat percentage (left)	Hair colour (natural	0.001	397	-0.30332	0.283808	0.43254
23124	1727	Arm fat mass (left)	Ease of skin tanning	1e-05	5	0.295838	0.336726	0.158872
23124	1727	Arm fat mass (left)	Ease of skin tanning	0.0001	62	0.222143	0.291923	0.471163
23124	1727	Arm fat mass (left)	Ease of skin tanning	0.001	406	-0.0361458	0.270137	1
23124	1747_5	Arm fat mass (left)	Hair colour (natural	1e-05	5	-0.0123487	0.173255	0.93218
23124	1747_5	Arm fat mass (left)	Hair colour (natural	0.0001	62	-0.0298128	0.254824	0.998178
23124	1747_5	Arm fat mass (left)	Hair colour (natural	0.001	406	-0.343305	0.249189	0.421055
23125	1727	Arm fat-free mass (left)	Ease of skin tanning	1e-05	7	1.7061e-15	0.127924	NA
23125	1727	Arm fat-free mass (left)	Ease of skin tanning	0.0001	47	4.71498e-15	0.272041	NA
23125	1727	Arm fat-free mass (left)	Ease of skin tanning	0.001	383	-0.150056	0.217565	0.726108
23125	1747_5	Arm fat-free mass (left)	Hair colour (natural	1e-05	7	-0.0119659	0.132731	0.737482
23125	1747_5	Arm fat-free mass (left)	Hair colour (natural	0.0001	47	-0.154274	0.261472	0.558788
23125	1747_5	Arm fat-free mass (left)	Hair colour (natural	0.001	383	-0.212869	0.23171	0.659531
23126	1727	Arm predicted mass (left)	Ease of skin tanning	1e-05	8	-0.0103013	0.238995	0.999966
23126	1727	Arm predicted mass (left)	Ease of skin tanning	0.0001	65	-0.0194501	0.215538	1
23126	1727	Arm predicted mass (left)	Ease of skin tanning	0.001	426	-0.229993	0.207442	0.528306
23126	1747_5	Arm predicted mass (left)	Hair colour (natural	1e-05	8	-0.0295662	0.136613	0.407679
23126	1747_5	Arm predicted mass (left)	Hair colour (natural	0.0001	65	-0.079267	0.231991	0.959305
23126	1747_5	Arm predicted mass (left)	Hair colour (natural	0.001	426	-0.0851746	0.167334	0.909969
23129	1727	Trunk fat-free mass	Ease of skin tanning	1e-05	9	0.00767465	0.146182	0.999959
23129	1727	Trunk fat-free mass	Ease of skin tanning	0.0001	52	0.0622003	0.171098	0.661358
23129	1727	Trunk fat-free mass	Ease of skin tanning	0.001	419	-0.194474	0.184466	0.506498
23129	1747_5	Trunk fat-free mass	Hair colour (natural	1e-05	9	-0.0467471	0.204984	0.772708
23129	1747_5	Trunk fat-free mass	Hair colour (natural	0.0001	52	0.0394942	0.285633	0.999417
23129	1747_5	Trunk fat-free mass	Hair colour (natural	0.001	419	0.00719664	0.166102	1
23130	1727	Trunk predicted mass	Ease of skin tanning	1e-05	7	-0.00504895	0.1458	1
23130	1727	Trunk predicted mass	Ease of skin tanning	0.0001	51	0.0609391	0.16892	0.669478
23130	1727	Trunk predicted mass	Ease of skin tanning	0.001	422	-0.148513	0.18401	0.724749
23130	1747_5	Trunk predicted mass	Hair colour (natural	1e-05	7	-0.00314116	0.149992	1
23130	1747_5	Trunk predicted mass	Hair colour (natural	0.0001	51	-0.0170375	0.245048	1
23130	1747_5	Trunk predicted mass	Hair colour (natural	0.001	422	0.0157912	0.212796	1
30100	1727	Mean platelet (thrombocyte) volume	Ease of skin tanning	1e-05	30	-0.0329509	0.0592252	0.863113
30100	1727	Mean platelet (thrombocyte) volume	Ease of skin tanning	0.0001	83	-0.019231	0.0489073	0.983149
30100	1727	Mean platelet (thrombocyte) volume	Ease of skin tanning	0.001	426	-0.00895434	0.0485476	0.99628
30100	1747_5	Mean platelet (thrombocyte) volume	Hair colour (natural	1e-05	30	-0.111225	0.0547687	0.255842
30100	1747_5	Mean platelet (thrombocyte) volume	Hair colour (natural	0.0001	83	-0.0875997	0.045566	0.269298
30100	1747_5	Mean platelet (thrombocyte) volume	Hair colour (natural	0.001	426	-0.0731772	0.040911	0.303713
30300	1727	High light scatter reticulocyte count	Ease of skin tanning	1e-05	8	-0.0704159	0.0958576	0.216014
30300	1727	High light scatter reticulocyte count	Ease of skin tanning	0.0001	65	-0.208046	0.116563	0.116023
30300	1727	High light scatter reticulocyte count	Ease of skin tanning	0.001	399	-0.16356	0.104808	0.281791
30300	1747_5	High light scatter reticulocyte count	Hair colour (natural	1e-05	8	-0.0651378	0.121531	0.83964
30300	1747_5	High light scatter reticulocyte count	Hair colour (natural	0.0001	65	-0.0353104	0.0995726	0.98132
30300	1747_5	High light scatter reticulocyte count	Hair colour (natural	0.001	399	0.0244809	0.0908832	0.994455
30600	1727	Albumin	Ease of skin tanning	1e-05	11	0.0764721	0.126063	0.88476
30600	1727	Albumin	Ease of skin tanning	0.0001	65	0.0677108	0.132338	0.971414
30600	1727	Albumin	Ease of skin tanning	0.001	375	-0.00936626	0.135593	0.982734
30600	1747_5	Albumin	Hair colour (natural	1e-05	11	0.0792	0.106998	0.704216
30600	1747_5	Albumin	Hair colour (natural	0.0001	65	0.0739676	0.112146	0.779487
30600	1747_5	Albumin	Hair colour (natural	0.001	375	0.108811	0.12244	0.679139
30870	1727	Triglycerides	Ease of skin tanning	1e-05	14	0.0143234	0.0499185	0.998448
30870	1727	Triglycerides	Ease of skin tanning	0.0001	60	-0.035581	0.0485697	0.791152
30870	1727	Triglycerides	Ease of skin tanning	0.001	362	-0.0305867	0.0498516	0.879622
30870	1747_5	Triglycerides	Hair colour (natural	1e-05	14	-0.025804	0.0505587	0.903495
30870	1747_5	Triglycerides	Hair colour (natural	0.0001	60	-0.0113942	0.0468669	0.998763
30870	1747_5	Triglycerides	Hair colour (natural	0.001	362	-0.0168855	0.04541	0.988574
30890	1727	Vitamin D	Ease of skin tanning	1e-05	5	-0.00488404	0.119574	0.984777
30890	1727	Vitamin D	Ease of skin tanning	0.0001	47	-0.0290003	0.147983	0.964643
30890	1727	Vitamin D	Ease of skin tanning	0.001	369	-0.04873	0.156347	0.947667
30890	1747_5	Vitamin D	Hair colour (natural	1e-05	5	-0.0065602	0.0975081	0.971128
30890	1747_5	Vitamin D	Hair colour (natural	0.0001	47	-0.0175045	0.134213	0.945961
30890	1747_5	Vitamin D	Hair colour (natural	0.001	369	-0.0401901	0.144161	0.922937

[truncated: 12 more sheets: Table S14-nc CSA results 5, Table S15-EAS data, Table S16-explore BBJ results, Table S17-explore TPMI results, Table S18-EAS-paired EUR result, Table S19-BBJ & TPMI after meta, Table S20-CSA data, Table S21-explore CSA results, Table S22-CSA-paired EUR result, Table S23-AFR data, Table S24-explore AFR results, Table S25-AFR-paired EUR result]
